# Supplementary material
Source: PubMed Central journal article supplement (PMC3167544)

# Innate C–H Trifluoromethylation of Heterocycles

Yining Ji,<sup>+</sup> Tobias Brueckl,<sup>+</sup> Ryan D. Baxter, Yuta Fujiwara, Ian B. Seiple, Shun Su, Donna Blackmond, Phil S. Baran\*

*Department of Chemistry, The Scripps Research Institute, 10550 N. Torrey Pines Rd, La Jolla, CA 92037*

## SUPPORTING INFORMATION – SPECTRA

### Table of Contents

|                            |                          |               |
|----------------------------|--------------------------|---------------|
| Spectra for Compounds..... | page                     | SI-4 – SI-125 |
| Compound 1-C2              | <sup>1</sup> H-NMR.....  | page SI-4     |
| Compound 1-C2              | <sup>13</sup> C-NMR..... | page SI-5     |
| Compound 1-C2              | <sup>19</sup> F-NMR..... | page SI-6     |
| Compound 1-C3              | <sup>1</sup> H-NMR.....  | page SI-7     |
| Compound 1-C3              | <sup>13</sup> C-NMR..... | page SI-8     |
| Compound 1-C3              | <sup>19</sup> F-NMR..... | page SI-9     |
| Compound 3+5A              | <sup>1</sup> H-NMR.....  | page SI-10    |
| Compound 3+5A              | <sup>13</sup> C-NMR..... | page SI-11    |
| Compound 3+5A              | <sup>19</sup> F-NMR..... | page SI-12    |
| Compound 4A                | <sup>1</sup> H-NMR.....  | page SI-13    |
| Compound 4A                | <sup>13</sup> C-NMR..... | page SI-14    |
| Compound 4A                | <sup>19</sup> F-NMR..... | page SI-15    |
| Compound 4-C2              | <sup>1</sup> H-NMR.....  | page SI-16    |
| Compound 4-C2              | <sup>13</sup> C-NMR..... | page SI-17    |
| Compound 4-C2              | <sup>19</sup> F-NMR..... | page SI-18    |
| Compound 4-C3              | <sup>1</sup> H-NMR.....  | page SI-19    |
| Compound 4-C3              | <sup>13</sup> C-NMR..... | page SI-20    |
| Compound 4-C3              | <sup>19</sup> F-NMR..... | page SI-21    |
| Compound 5A                | <sup>1</sup> H-NMR.....  | page SI-22    |
| Compound 5A                | <sup>13</sup> C-NMR..... | page SI-23    |
| Compound 5A                | <sup>19</sup> F-NMR..... | page SI-24    |
| Compound 5-C2              | <sup>1</sup> H-NMR.....  | page SI-25    |
| Compound 5-C2              | <sup>13</sup> C-NMR..... | page SI-26    |
| Compound 5-C2              | <sup>19</sup> F-NMR..... | page SI-27    |
| Compound 5-C3              | <sup>1</sup> H-NMR.....  | page SI-28    |
| Compound 5-C3              | <sup>13</sup> C-NMR..... | page SI-29    |
| Compound 5-C3              | <sup>19</sup> F-NMR..... | page SI-30    |
| Compound 6-C2              | <sup>1</sup> H-NMR.....  | page SI-31    |
| Compound 6-C2              | <sup>13</sup> C-NMR..... | page SI-32    |
| Compound 6-C2              | <sup>19</sup> F-NMR..... | page SI-33    |
| Compound 6-C3              | <sup>1</sup> H-NMR.....  | page SI-34    |
| Compound 6-C3              | <sup>13</sup> C-NMR..... | page SI-35    |
| Compound 6-C3              | <sup>19</sup> F-NMR..... | page SI-36    |
| Compound 7                 | <sup>1</sup> H-NMR.....  | page SI-37    |
| Compound 7                 | <sup>13</sup> C-NMR..... | page SI-38    |
| Compound 7                 | <sup>19</sup> F-NMR..... | page SI-39    |
| Compound 7A                | <sup>1</sup> H-NMR.....  | page SI-40    |
| Compound 7A                | <sup>13</sup> C-NMR..... | page SI-41    |
| Compound 7A                | <sup>19</sup> F-NMR..... | page SI-42    |
| Compound 8                 | <sup>1</sup> H-NMR.....  | page SI-43    |
| Compound 8                 | <sup>13</sup> C-NMR..... | page SI-44    |
| Compound 8                 | <sup>19</sup> F-NMR..... | page SI-45    |
| Compound 9                 | <sup>1</sup> H-NMR.....  | page SI-46    |
| Compound 9                 | <sup>13</sup> C-NMR..... | page SI-47    |
| Compound 9                 | <sup>19</sup> F-NMR..... | page SI-48    |
| Compound 10                | <sup>1</sup> H-NMR.....  | page SI-49    |
| Compound 10                | <sup>13</sup> C-NMR..... | page SI-50    |
| Compound 10                | <sup>19</sup> F-NMR..... | page SI-51    |
| Compound 11                | <sup>13</sup> C-NMR..... | page SI-52    |
| Compound 11                | <sup>19</sup> F-NMR..... | page SI-53    |

|                   |                           |      |        |
|-------------------|---------------------------|------|--------|
| Compound 12-C5    | <sup>1</sup> H-NMR .....  | page | SI-54  |
| Compound 12-C5    | <sup>13</sup> C-NMR ..... | page | SI-55  |
| Compound 12-C5    | <sup>19</sup> F-NMR ..... | page | SI-56  |
| Compound 12-C4    | <sup>1</sup> H-NMR .....  | page | SI-57  |
| Compound 12-C4    | <sup>13</sup> C-NMR ..... | page | SI-58  |
| Compound 12-C4    | <sup>19</sup> F-NMR ..... | page | SI-59  |
| Compound 12A      | <sup>1</sup> H-NMR .....  | page | SI-60  |
| Compound 12A      | <sup>13</sup> C-NMR ..... | page | SI-61  |
| Compound 12A      | <sup>19</sup> F-NMR ..... | page | SI-62  |
| Compound 13       | <sup>1</sup> H-NMR .....  | page | SI-63  |
| Compound 13       | <sup>13</sup> C-NMR ..... | page | SI-64  |
| Compound 13       | <sup>19</sup> F-NMR ..... | page | SI-65  |
| Compound 13A      | <sup>1</sup> H-NMR .....  | page | SI-66  |
| Compound 13A      | <sup>13</sup> C-NMR ..... | page | SI-67  |
| Compound 13A      | <sup>19</sup> F-NMR ..... | page | SI-68  |
| Compound 14-C2    | <sup>1</sup> H-NMR .....  | page | SI-69  |
| Compound 14-C2    | <sup>13</sup> C-NMR ..... | page | SI-70  |
| Compound 14-C2    | <sup>19</sup> F-NMR ..... | page | SI-71  |
| Compound 14-C6    | <sup>1</sup> H-NMR .....  | page | SI-72  |
| Compound 14-C6    | <sup>13</sup> C-NMR ..... | page | SI-73  |
| Compound 14-C6    | <sup>19</sup> F-NMR ..... | page | SI-74  |
| Compound 15       | <sup>1</sup> H-NMR .....  | page | SI-75  |
| Compound 15       | <sup>13</sup> C-NMR ..... | page | SI-76  |
| Compound 15       | <sup>19</sup> F-NMR ..... | page | SI-77  |
| Compound 16-C4+C5 | <sup>1</sup> H-NMR .....  | page | SI-78  |
| Compound 16-C4+C5 | <sup>13</sup> C-NMR ..... | page | SI-79  |
| Compound 16-C4+C5 | <sup>19</sup> F-NMR ..... | page | SI-80  |
| Compound 17       | <sup>1</sup> H-NMR .....  | page | SI-81  |
| Compound 17       | <sup>13</sup> C-NMR ..... | page | SI-82  |
| Compound 17       | <sup>19</sup> F-NMR ..... | page | SI-83  |
| Compound 18-C5    | <sup>1</sup> H-NMR .....  | page | SI-84  |
| Compound 18-C5    | <sup>13</sup> C-NMR ..... | page | SI-85  |
| Compound 18-C5    | <sup>19</sup> F-NMR ..... | page | SI-86  |
| Compound 18-C6    | <sup>1</sup> H-NMR .....  | page | SI-87  |
| Compound 18-C6    | <sup>13</sup> C-NMR ..... | page | SI-88  |
| Compound 18-C6    | <sup>19</sup> F-NMR ..... | page | SI-89  |
| Compound 19       | <sup>1</sup> H-NMR .....  | page | SI-90  |
| Compound 19       | <sup>13</sup> C-NMR ..... | page | SI-91  |
| Compound 19       | <sup>19</sup> F-NMR ..... | page | SI-92  |
| Compound 20       | <sup>1</sup> H-NMR .....  | page | SI-93  |
| Compound 20       | <sup>13</sup> C-NMR ..... | page | SI-94  |
| Compound 20       | <sup>19</sup> F-NMR ..... | page | SI-95  |
| Compound 21       | <sup>1</sup> H-NMR .....  | page | SI-96  |
| Compound 21       | <sup>13</sup> C-NMR ..... | page | SI-97  |
| Compound 21       | <sup>19</sup> F-NMR ..... | page | SI-98  |
| Compound 22       | <sup>1</sup> H-NMR .....  | page | SI-99  |
| Compound 22       | <sup>13</sup> C-NMR ..... | page | SI-100 |
| Compound 22       | <sup>19</sup> F-NMR ..... | page | SI-101 |
| Compound 23       | <sup>1</sup> H-NMR .....  | page | SI-102 |
| Compound 23       | <sup>13</sup> C-NMR ..... | page | SI-103 |
| Compound 23       | <sup>19</sup> F-NMR ..... | page | SI-104 |
| Compound 24       | <sup>1</sup> H-NMR .....  | page | SI-105 |
| Compound 24       | <sup>13</sup> C-NMR ..... | page | SI-106 |
| Compound 24       | <sup>19</sup> F-NMR ..... | page | SI-107 |
| Compound 25       | <sup>1</sup> H-NMR .....  | page | SI-108 |
| Compound 25       | <sup>13</sup> C-NMR ..... | page | SI-109 |
| Compound 25       | <sup>19</sup> F-NMR ..... | page | SI-110 |
| Compound 26       | <sup>1</sup> H-NMR .....  | page | SI-111 |
| Compound 26       | <sup>13</sup> C-NMR ..... | page | SI-112 |
| Compound 27       | <sup>1</sup> H-NMR .....  | page | SI-113 |
| Compound 27       | <sup>13</sup> C-NMR ..... | page | SI-114 |
| Compound 28       | <sup>1</sup> H-NMR .....  | page | SI-115 |
| Compound 28       | <sup>13</sup> C-NMR ..... | page | SI-116 |
| Compound 29       | <sup>1</sup> H-NMR .....  | page | SI-117 |
| Compound 29       | <sup>13</sup> C-NMR ..... | page | SI-118 |

|                       |                           |      |        |
|-----------------------|---------------------------|------|--------|
| Compound <b>29</b>    | <sup>19</sup> F-NMR ..... | page | SI-119 |
| Compound <b>30-C5</b> | <sup>1</sup> H-NMR .....  | page | SI-120 |
| Compound <b>30-C5</b> | <sup>13</sup> C-NMR ..... | page | SI-121 |
| Compound <b>30-C5</b> | <sup>19</sup> F-NMR ..... | page | SI-122 |
| Compound <b>30-C2</b> | <sup>1</sup> H-NMR .....  | page | SI-123 |
| Compound <b>30-C2</b> | <sup>13</sup> C-NMR ..... | page | SI-124 |
| Compound <b>30-C2</b> | <sup>19</sup> F-NMR ..... | page | SI-125 |
| 2-CF3-4-tBu-pyridine  | <sup>1</sup> H-NMR .....  | page | SI-126 |
| 2-CF3-4-tBu-pyridine  | <sup>13</sup> C-NMR ..... | page | SI-127 |
| 2-CF3-4-tBu-pyridine  | <sup>19</sup> F-NMR ..... | page | SI-128 |

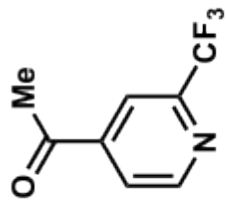

Compound 1-C2  
1H NMR, 400 MHz

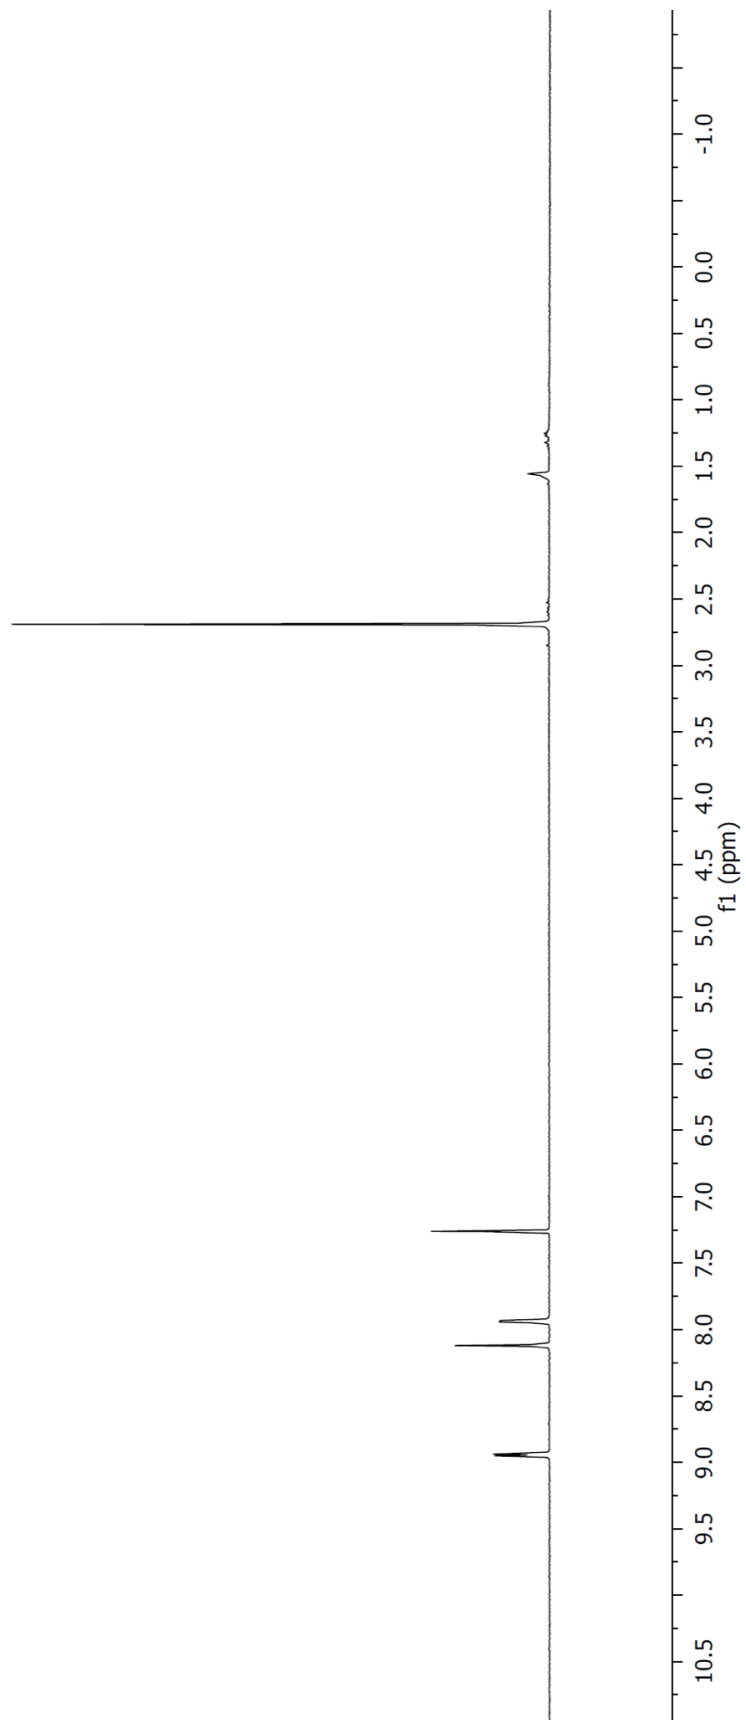

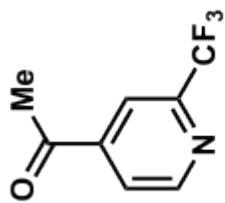

Compound 1-C2  
13C NMR, 150 MHz

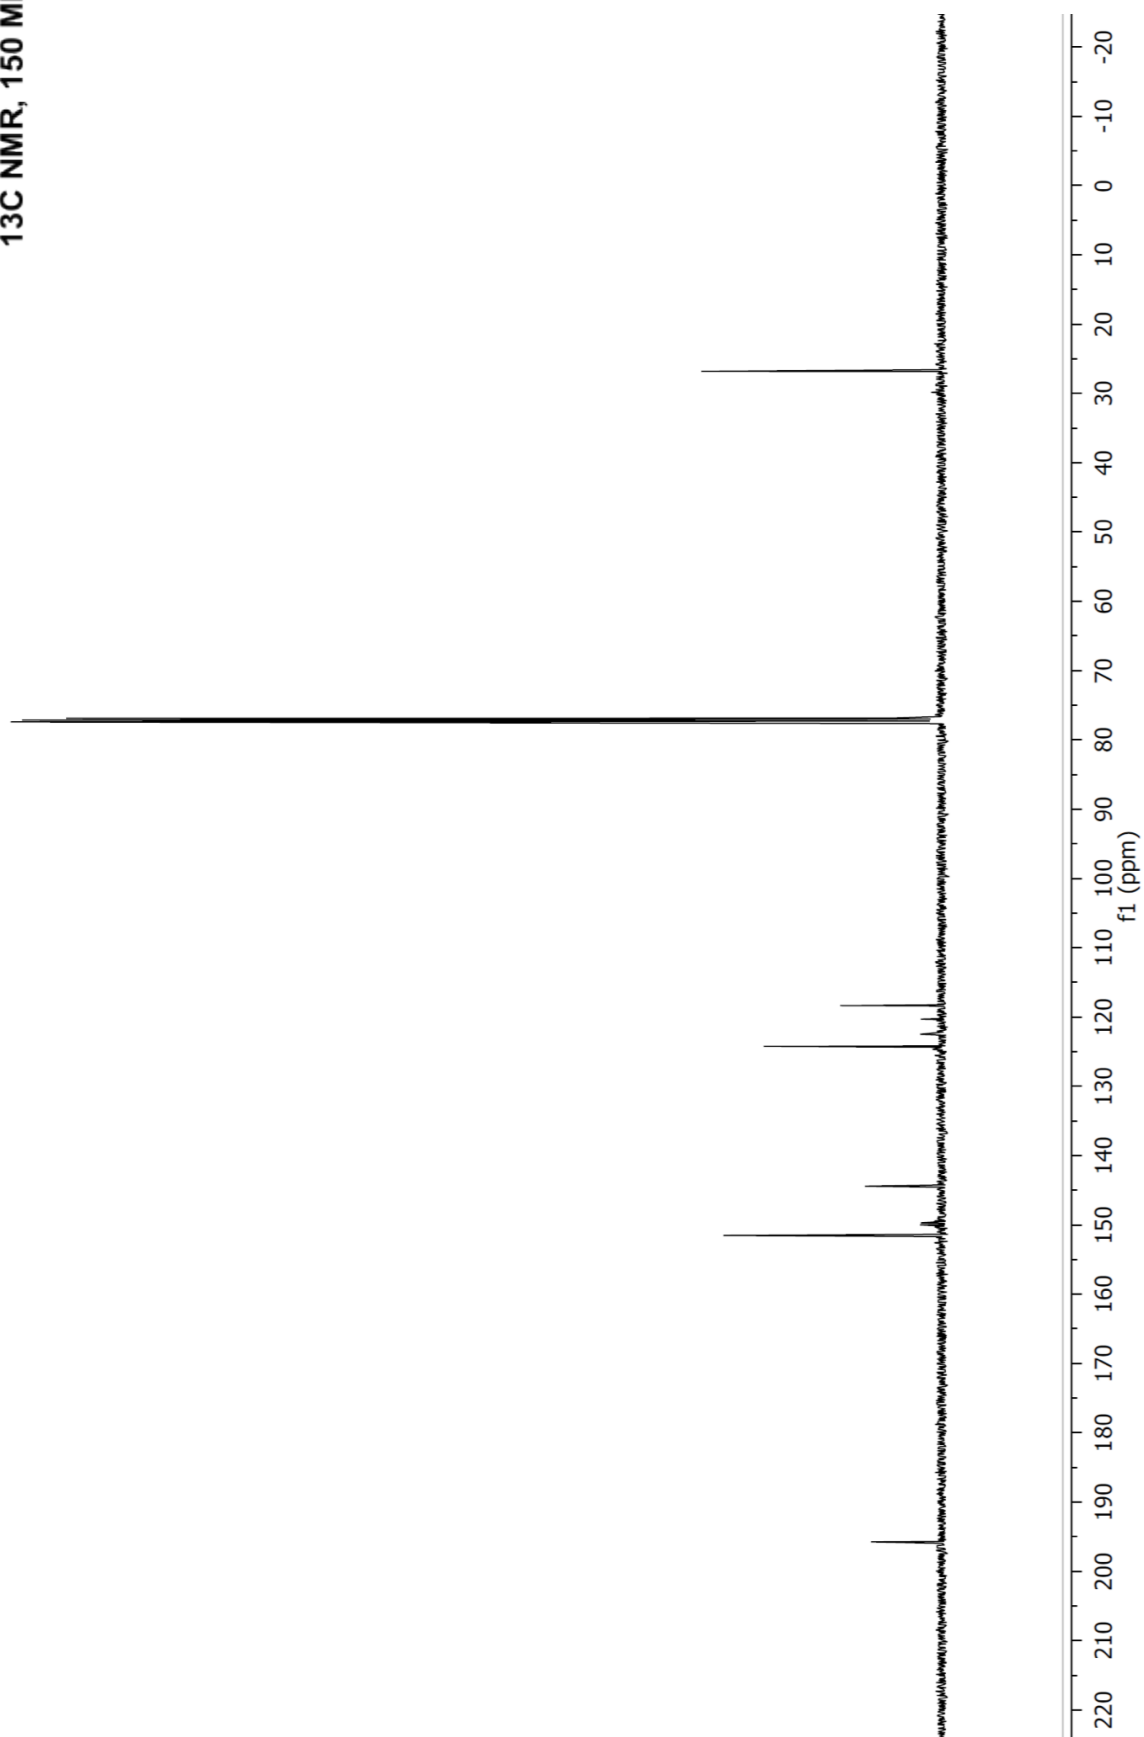

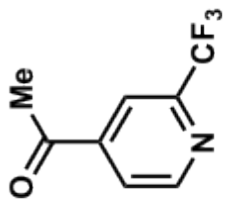

Compound 1-C2  
19F NMR, 376 MHz

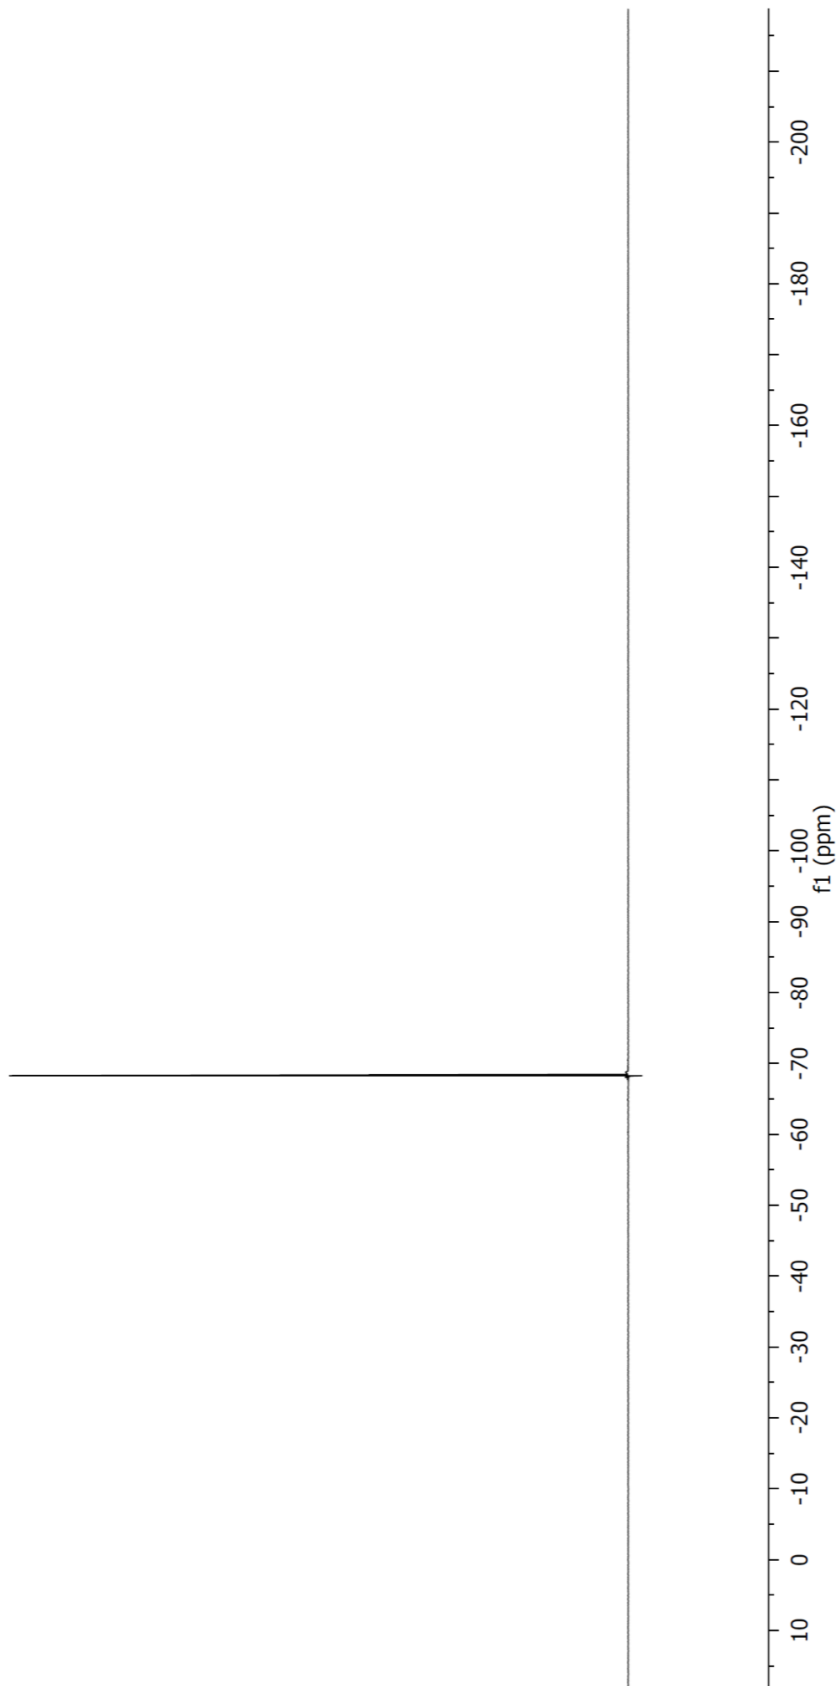

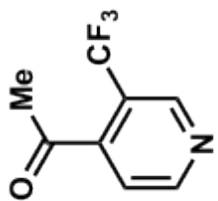

Compound 1-C3  
1H NMR, 400 MHz

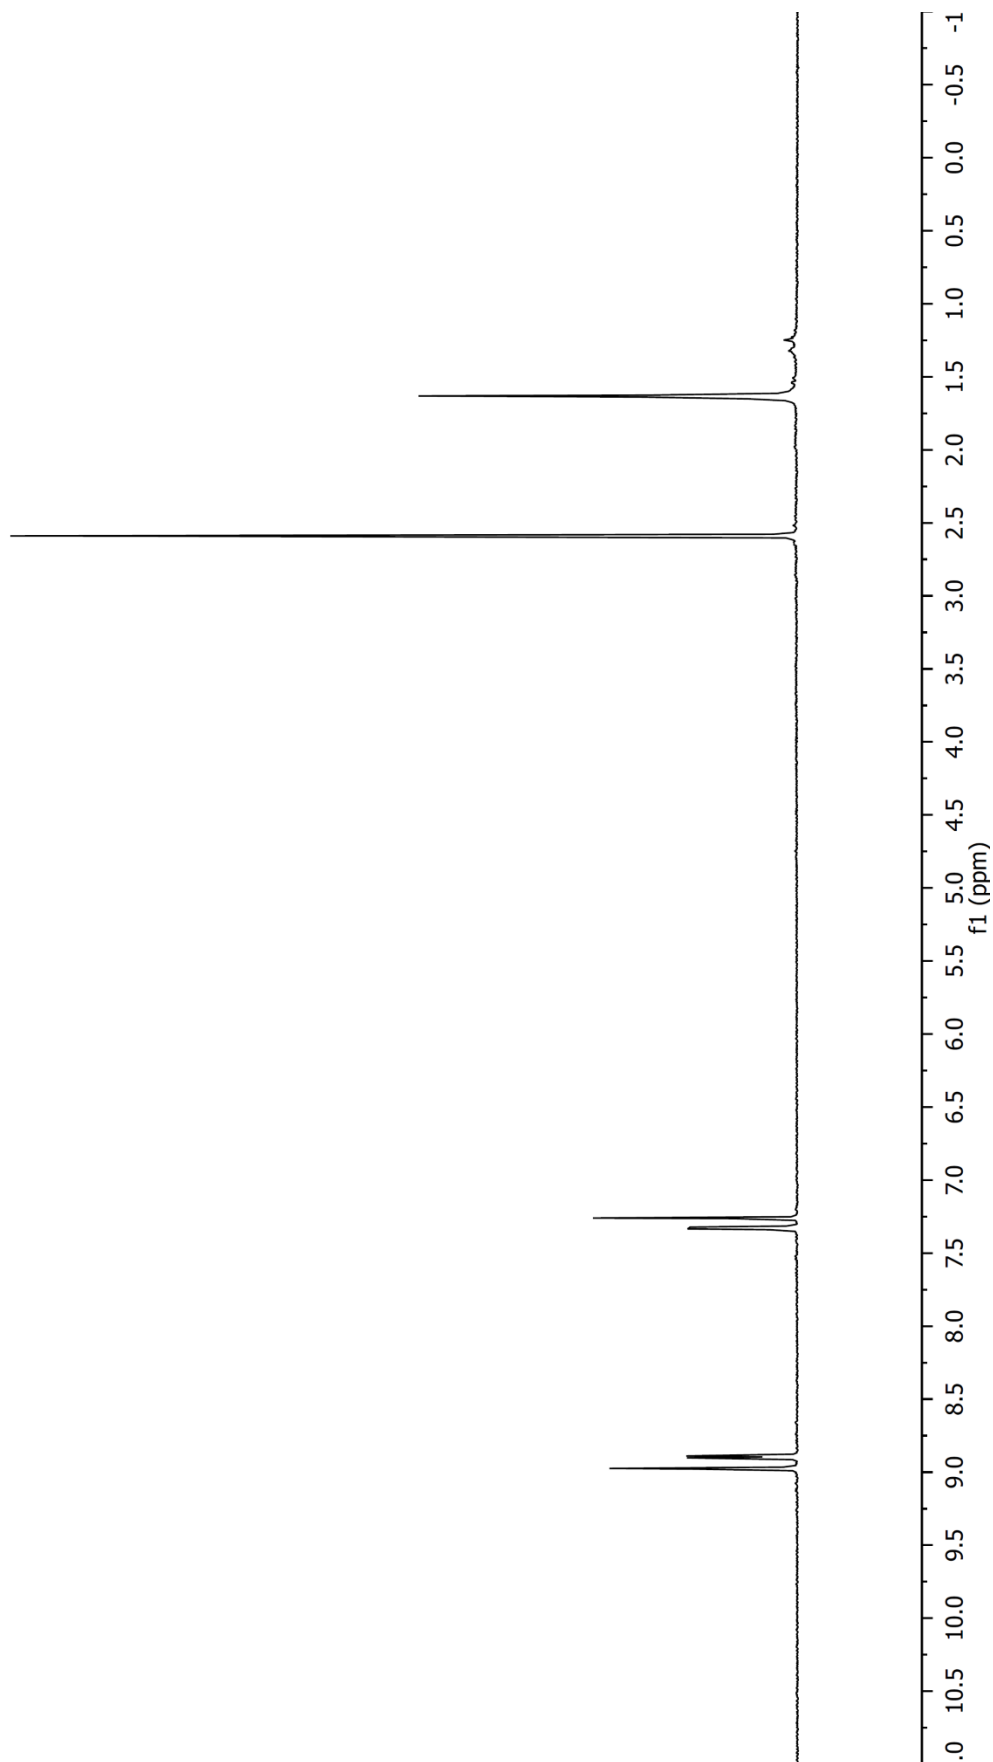

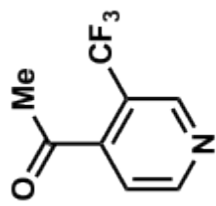

Compound 1-C3  
13C NMR, 150 MHz

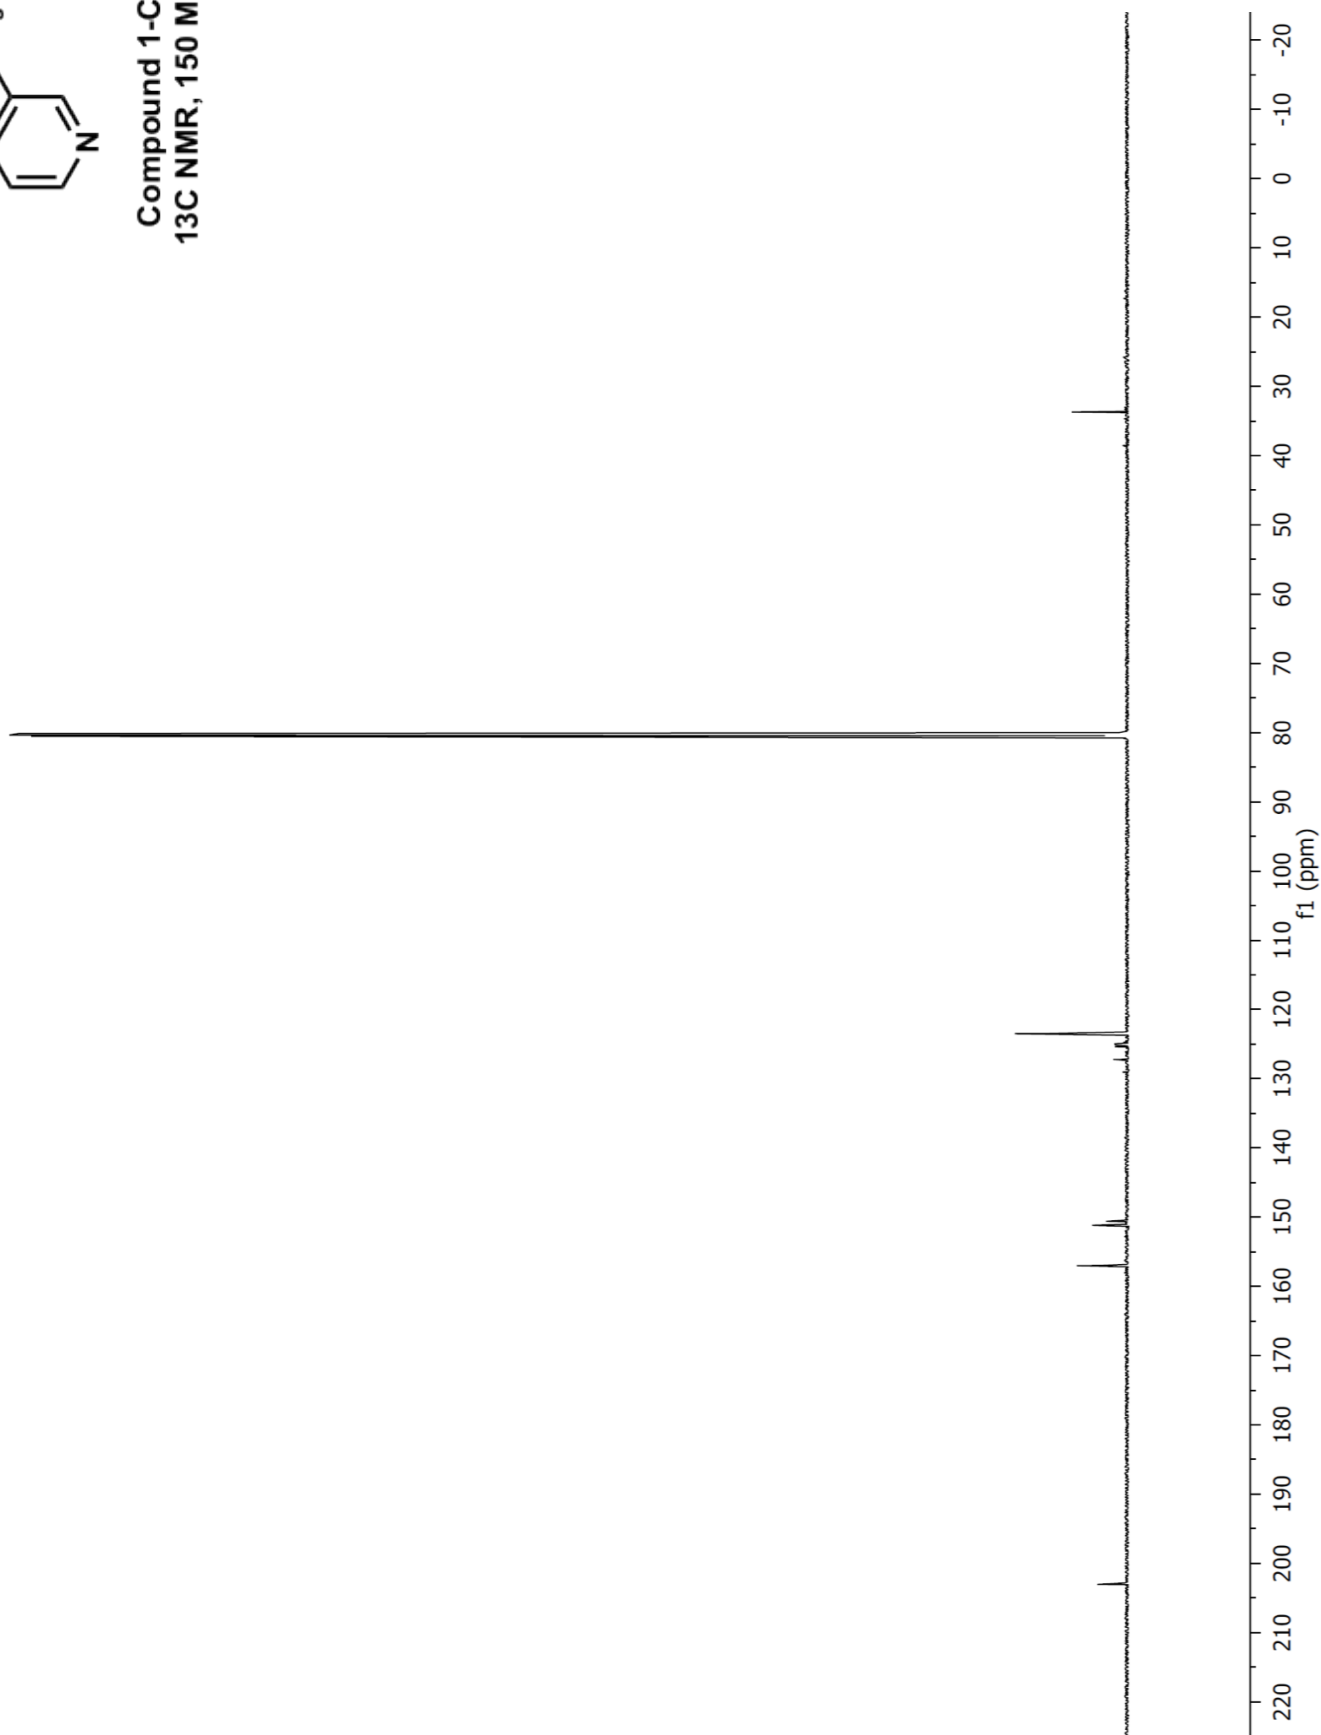



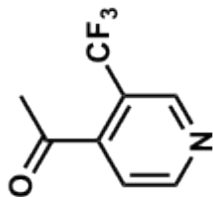

Compound 1-C3  
19F NMR, 376 MHz

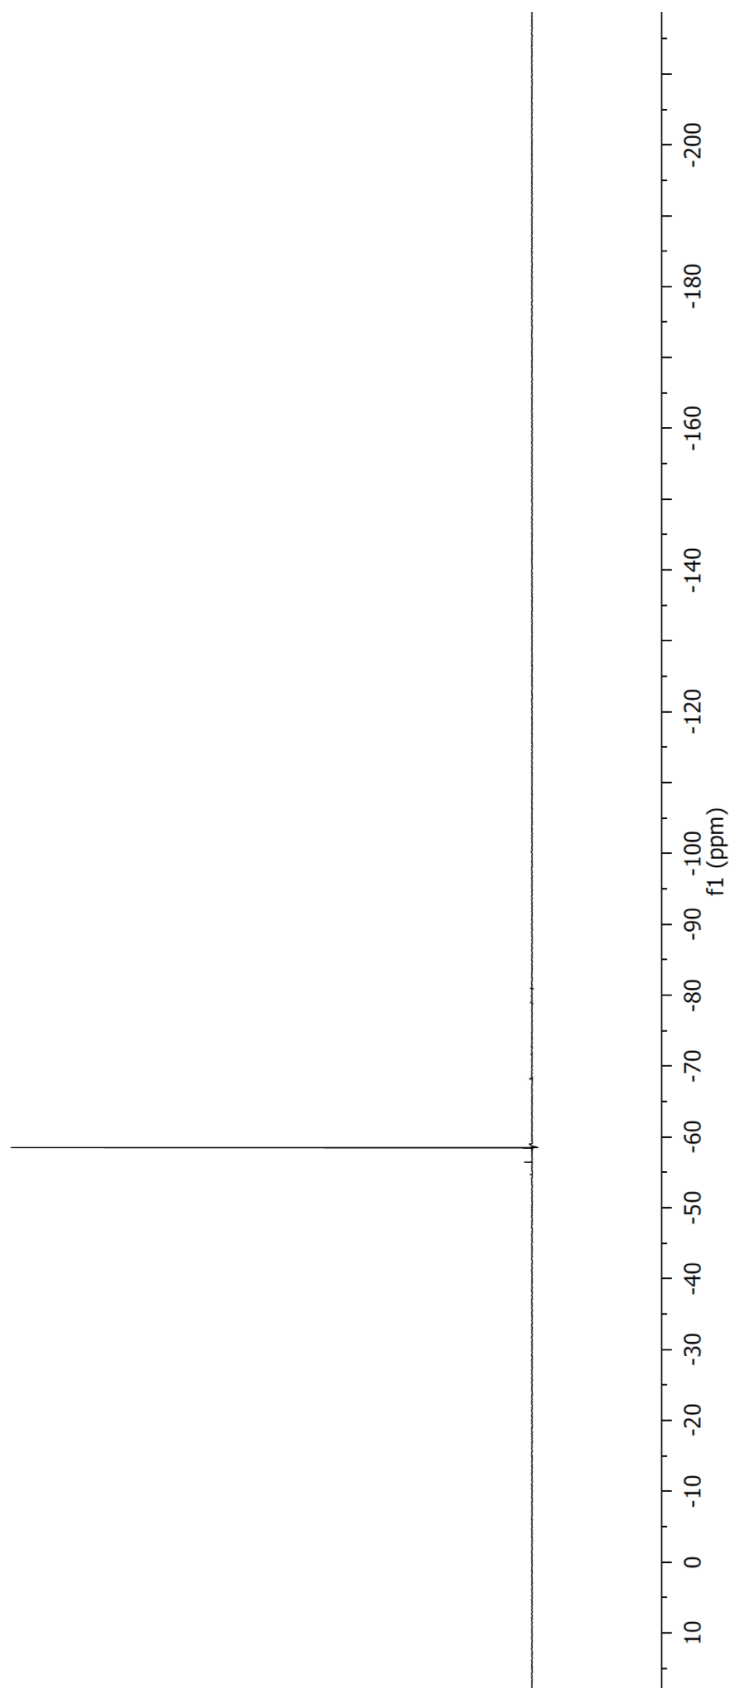

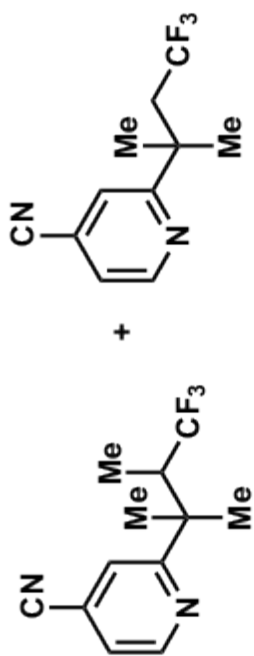

Compound 3+5A  
1H NMR, 400 MHz

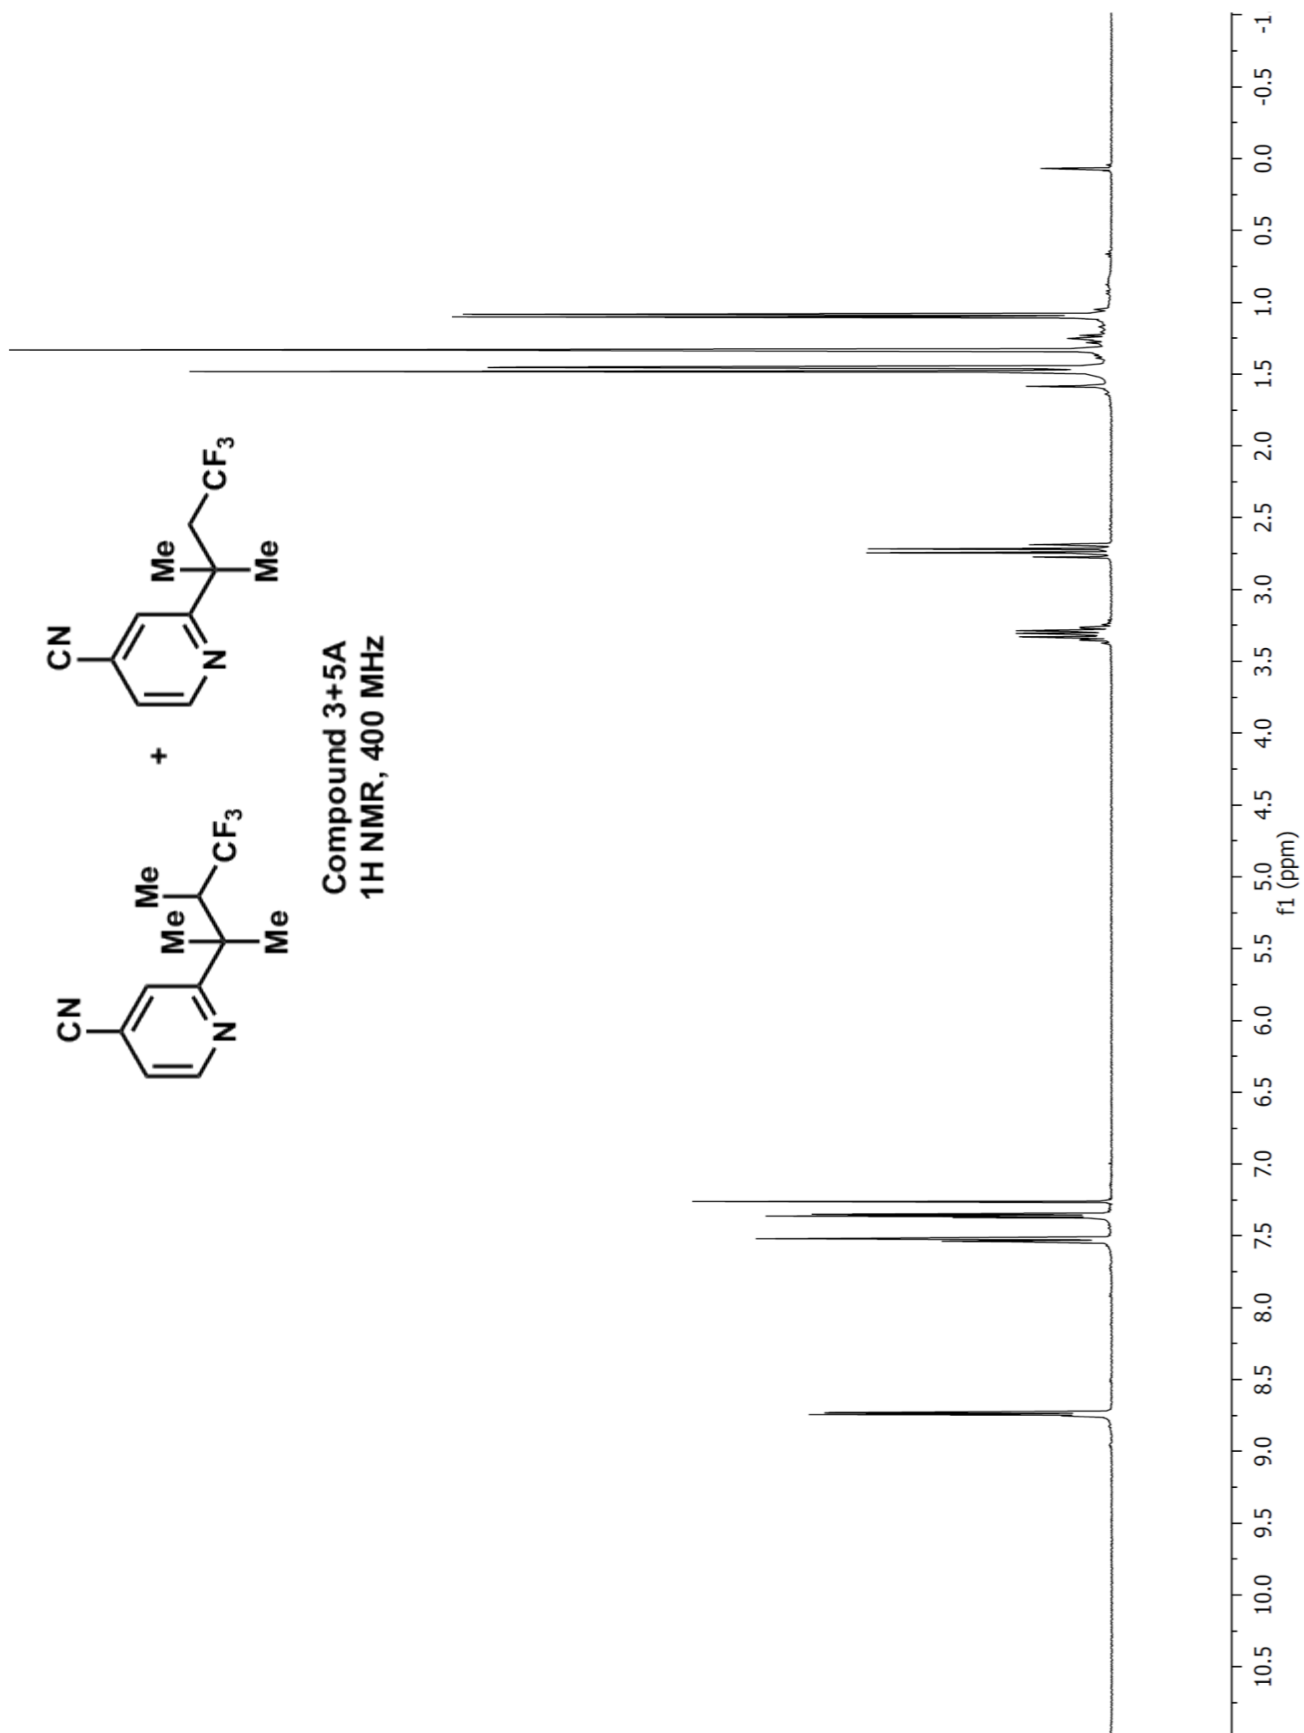

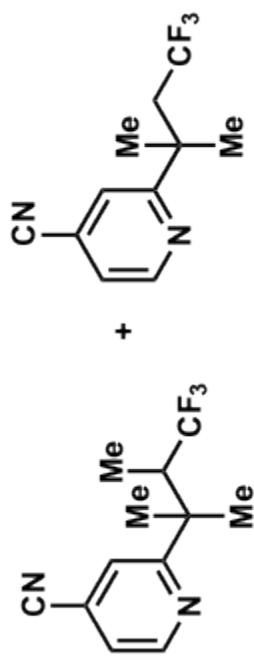

Compound 3+5A  
<sup>13</sup>C NMR, 150 MHz

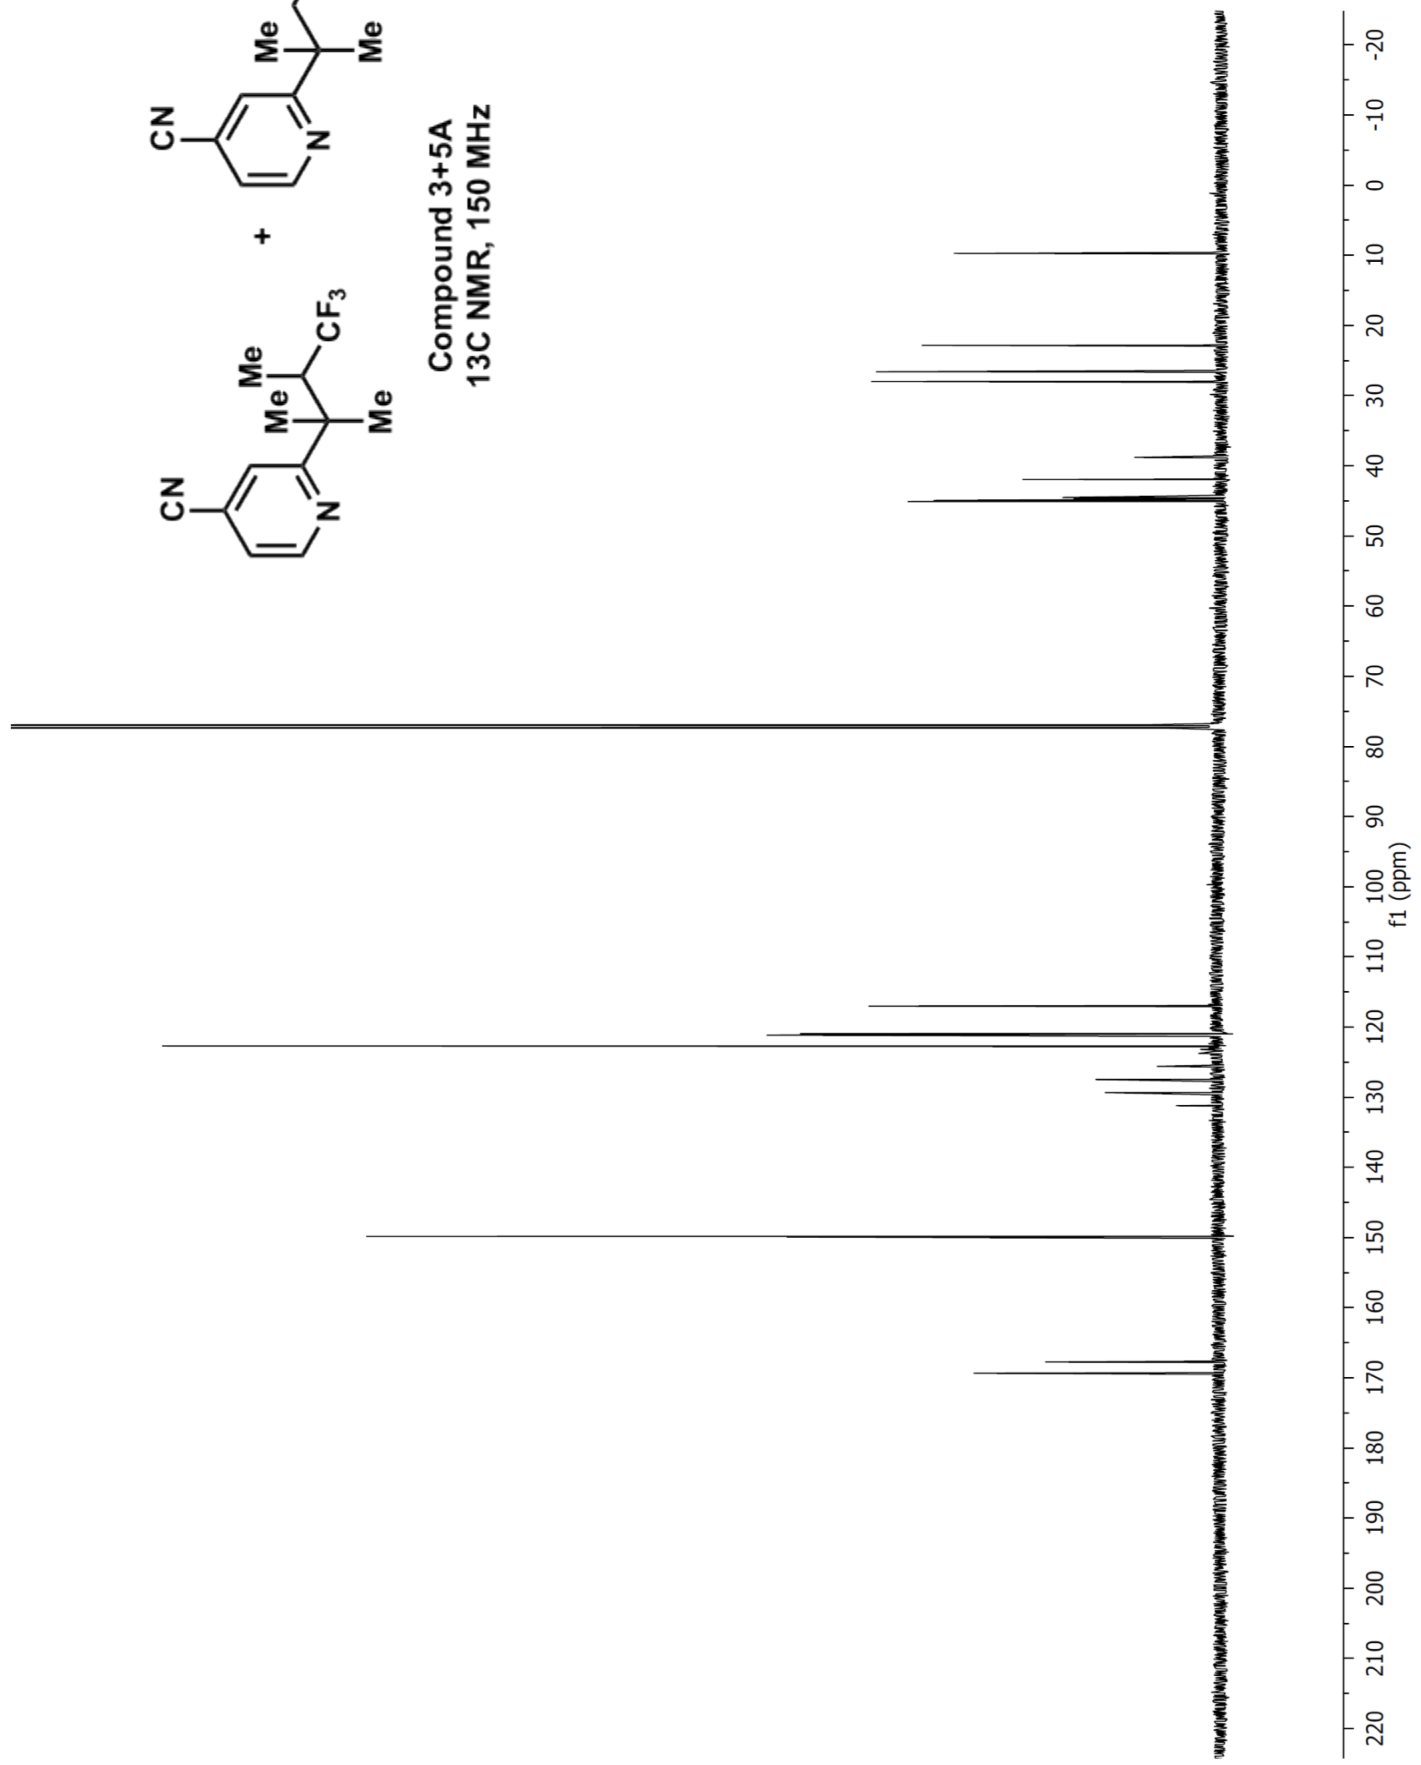

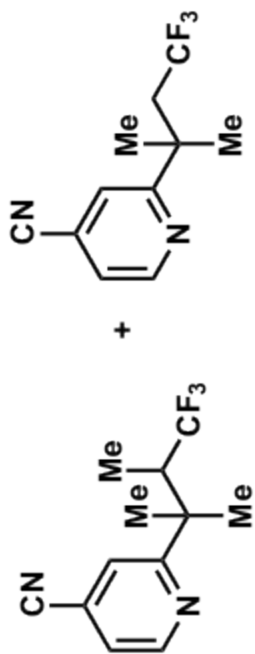

Compound 3+5A  
19F NMR, 376 MHz

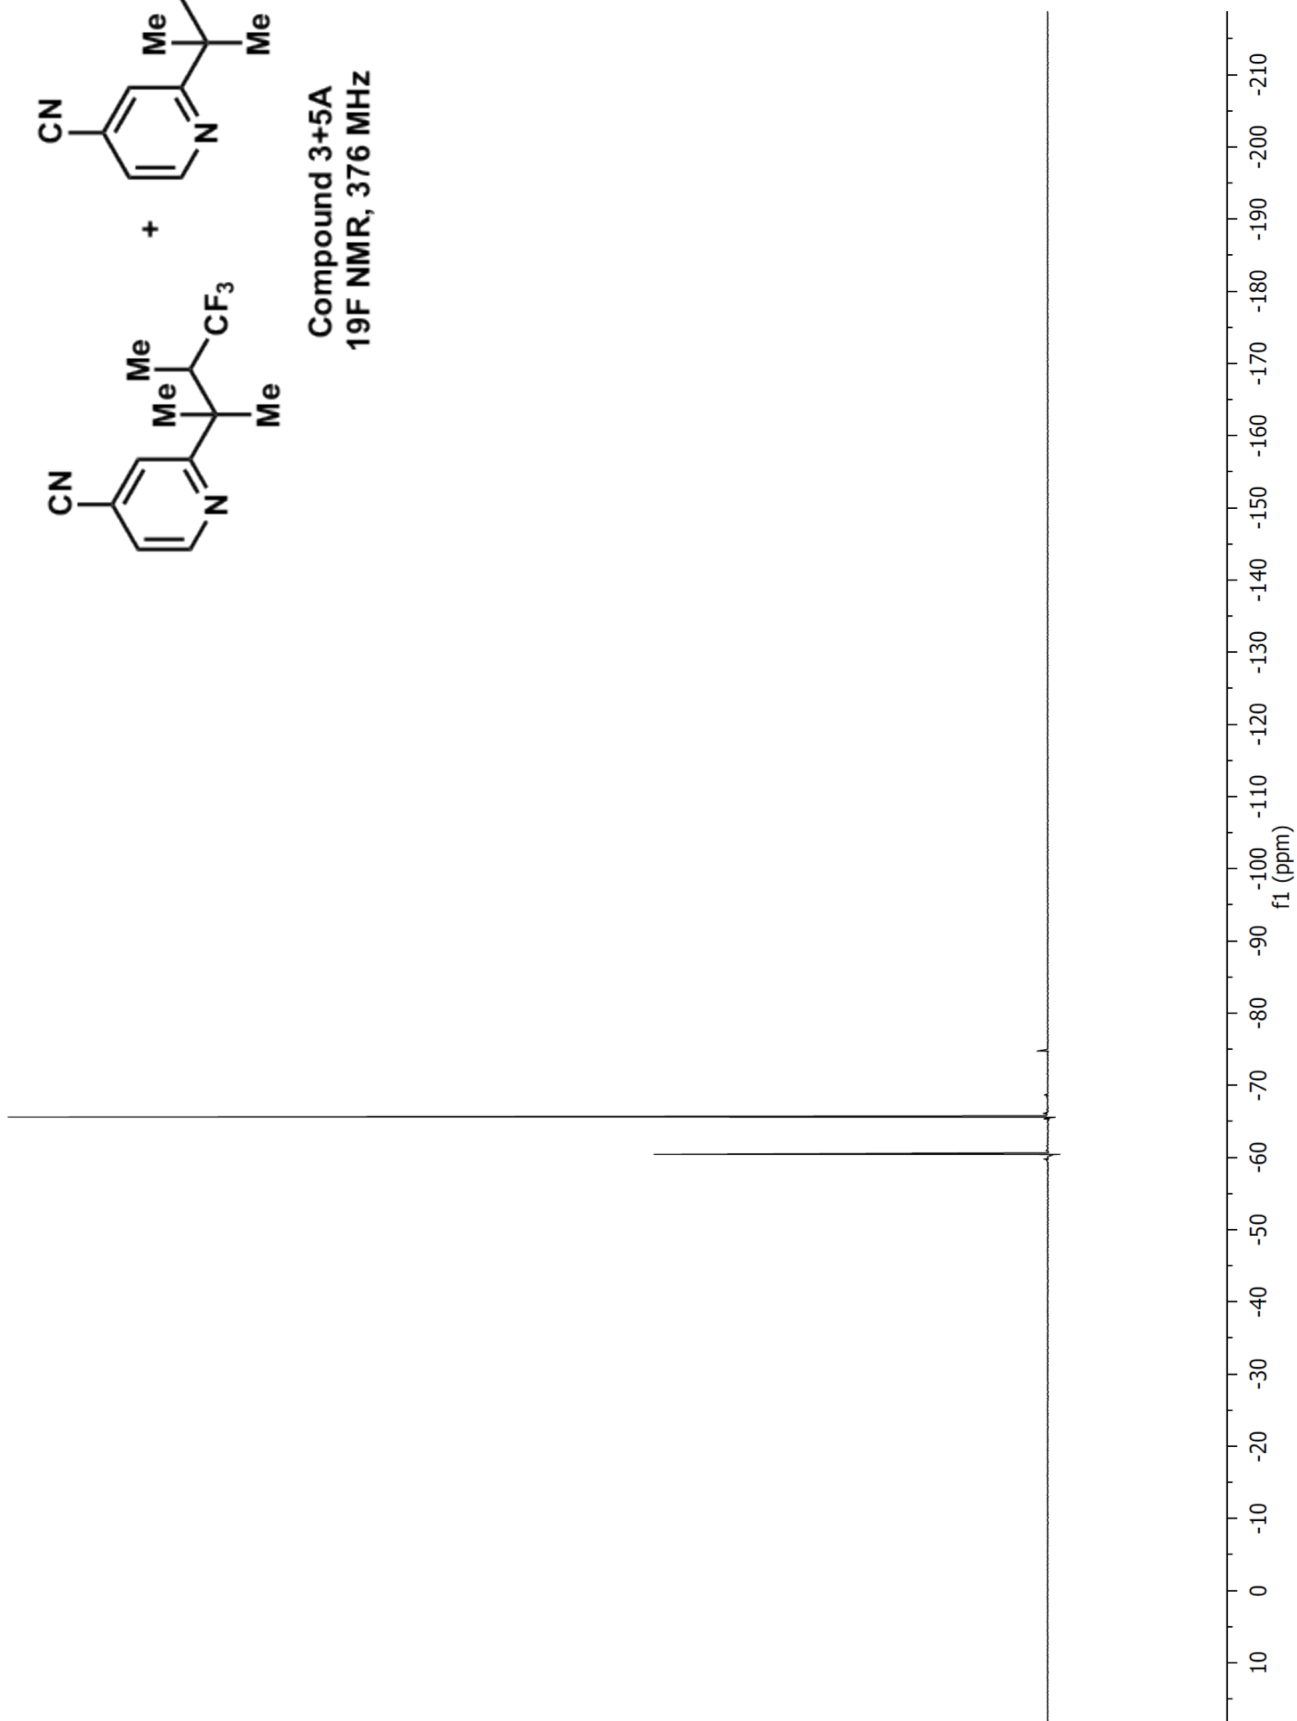

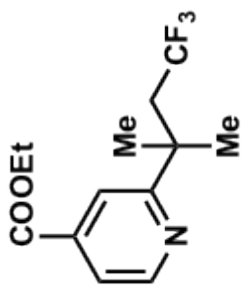

Compound 4A  
1H NMR, 400 MHz

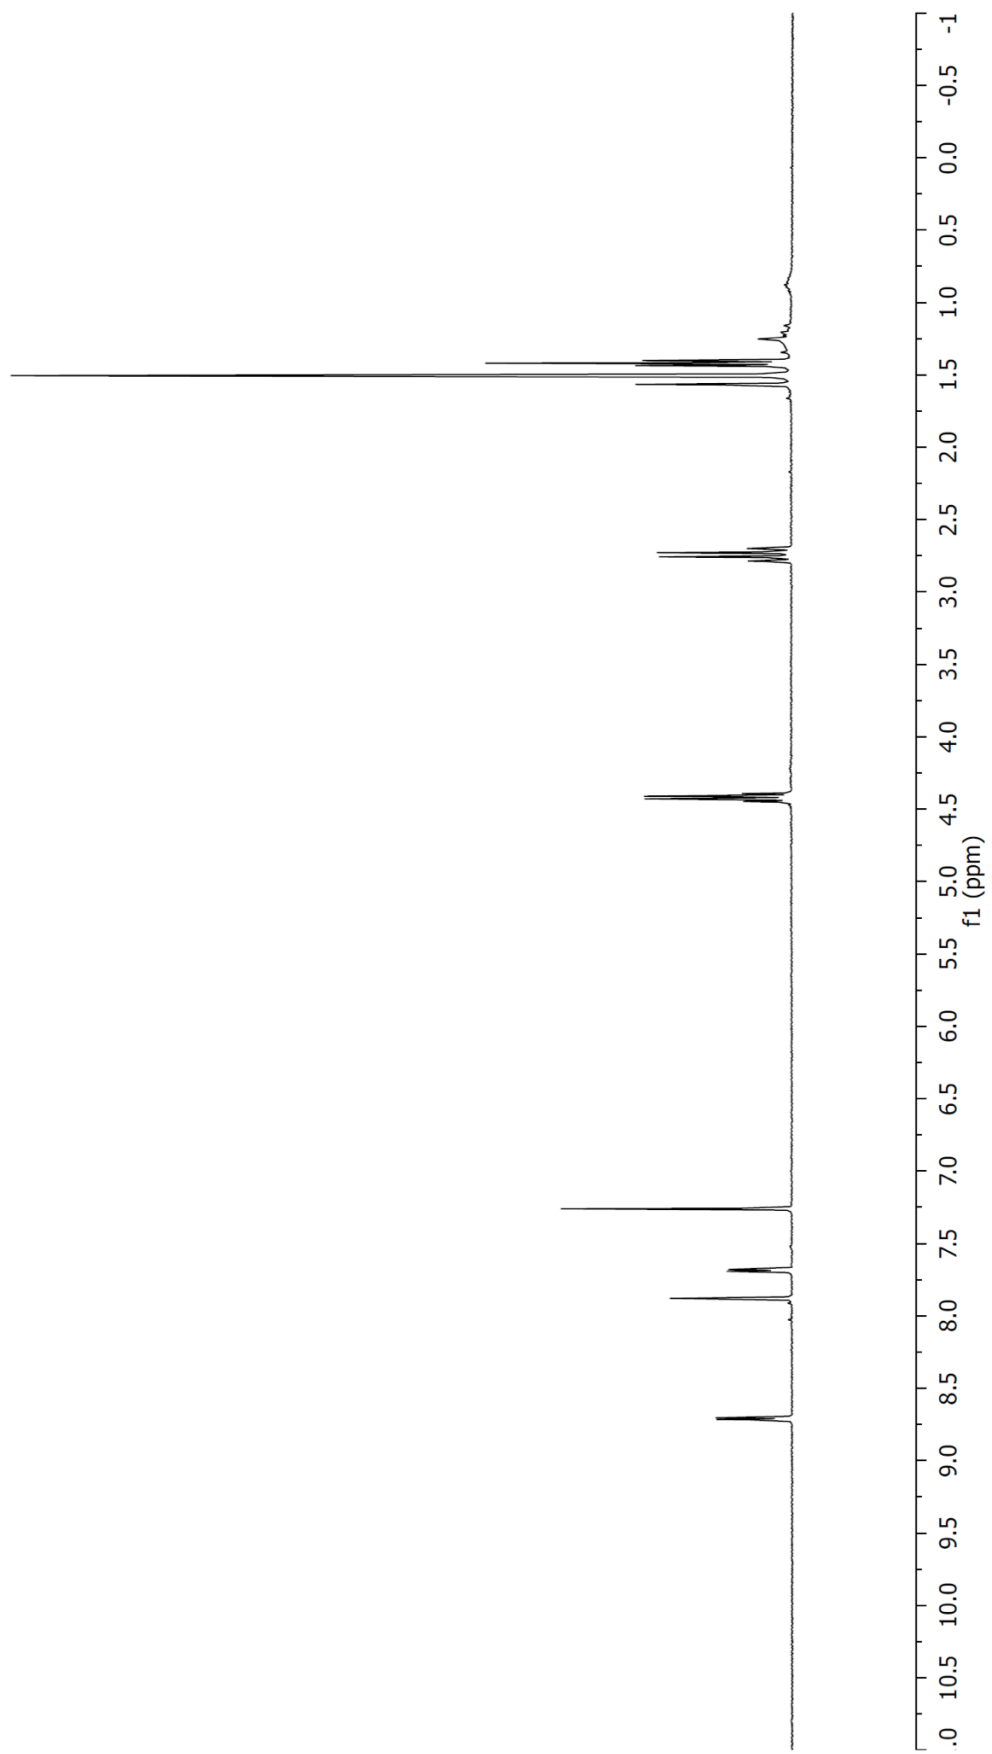

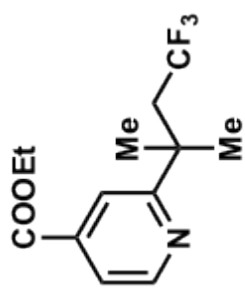

Compound 4A  
13C NMR, 150 MHz

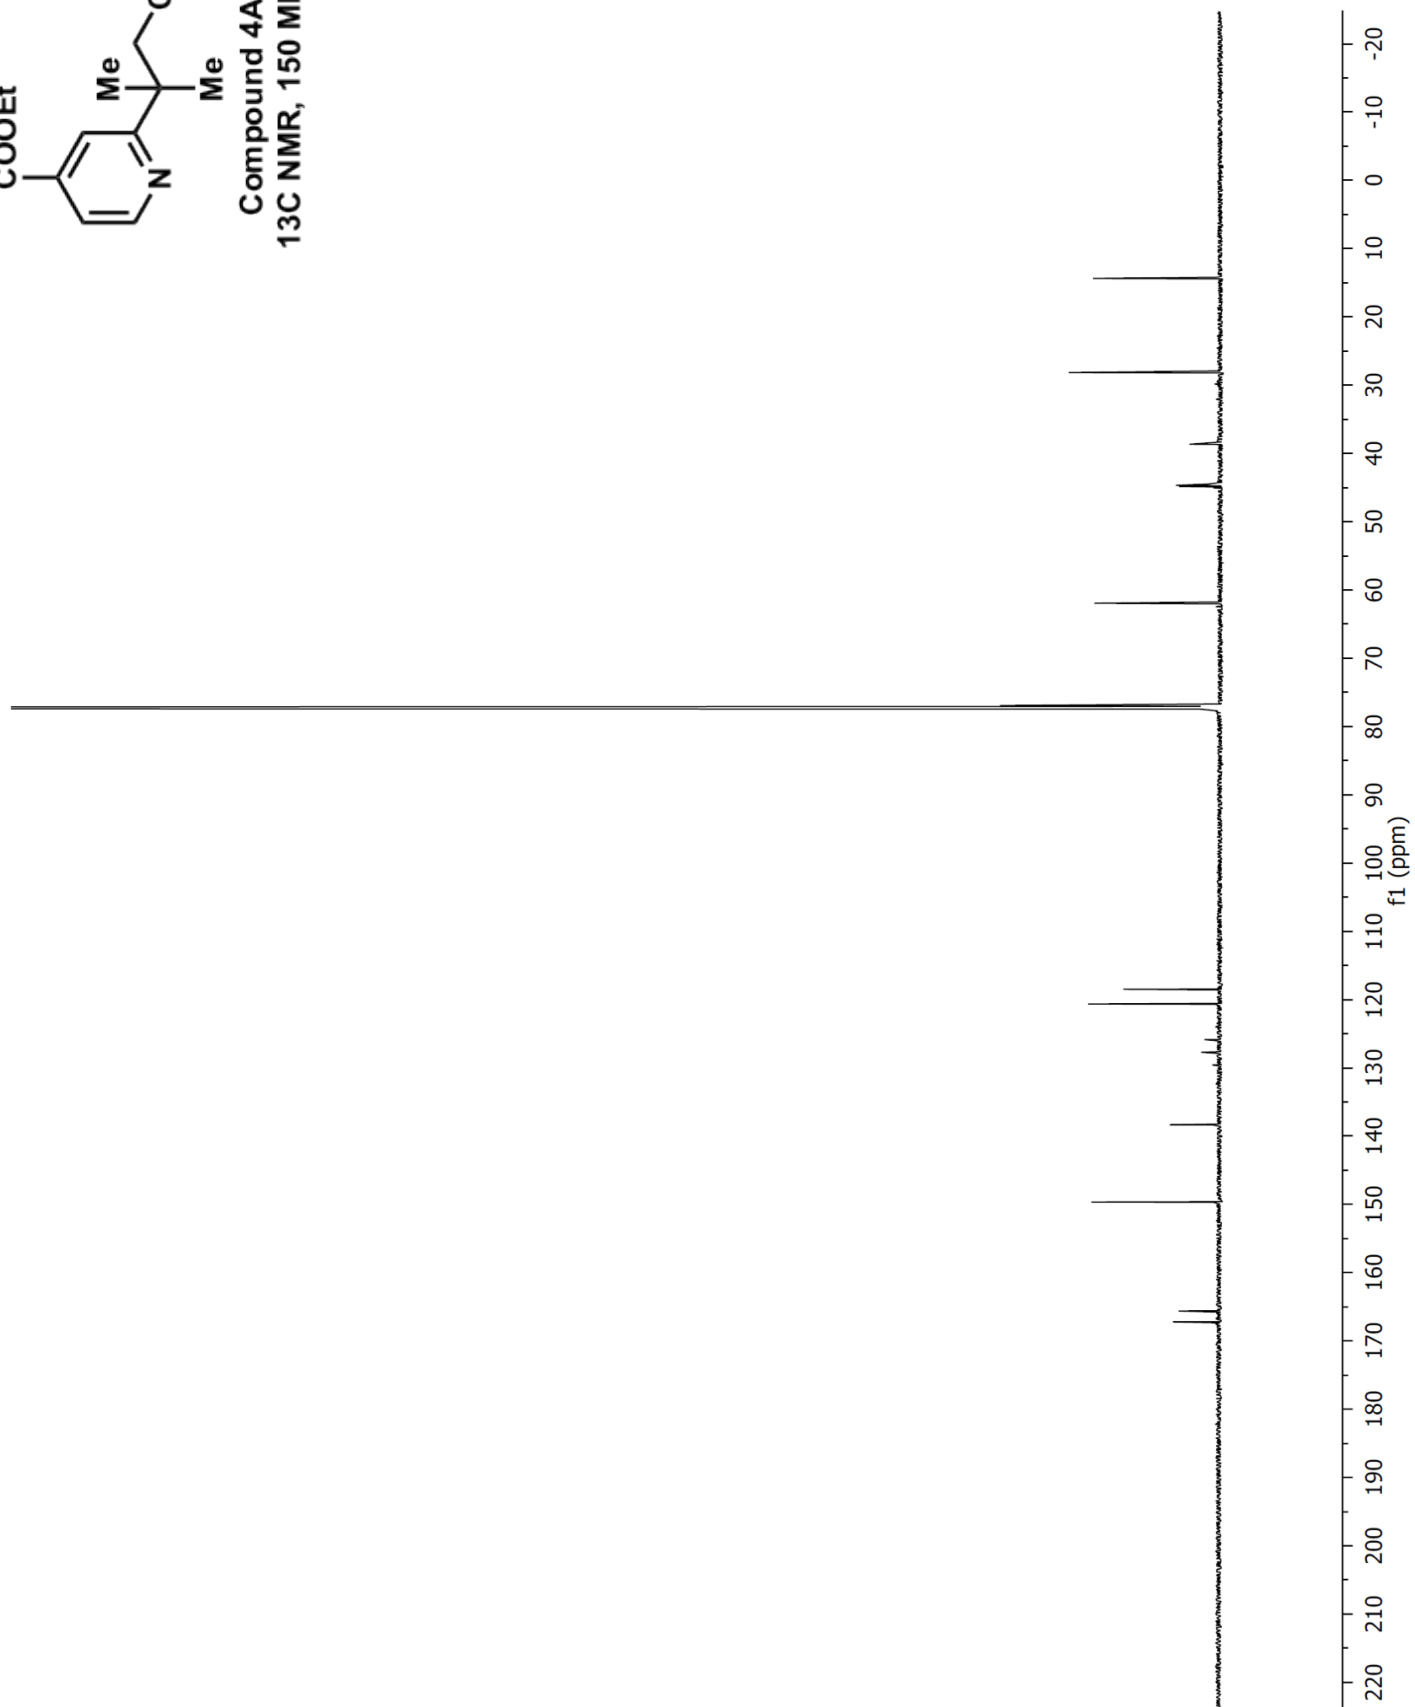

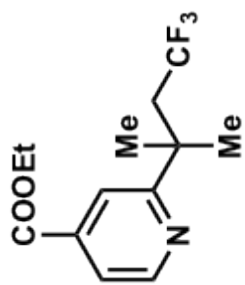

Compound 4A  
19F NMR, 376 MHz

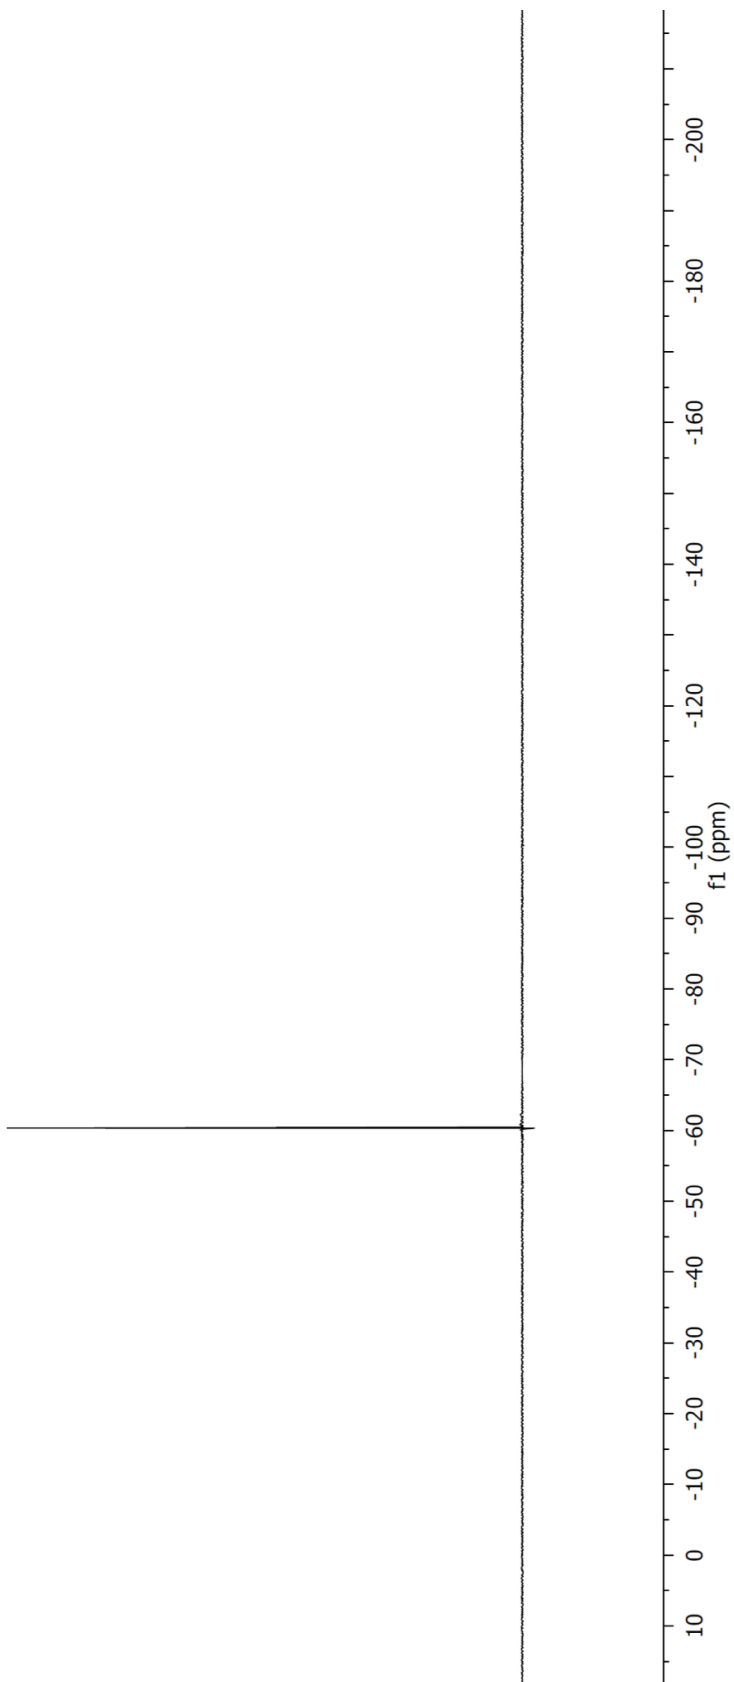

COOEt

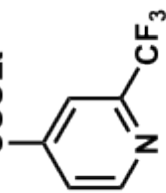

Compound 4-C2  
1H NMR, 400 MHz

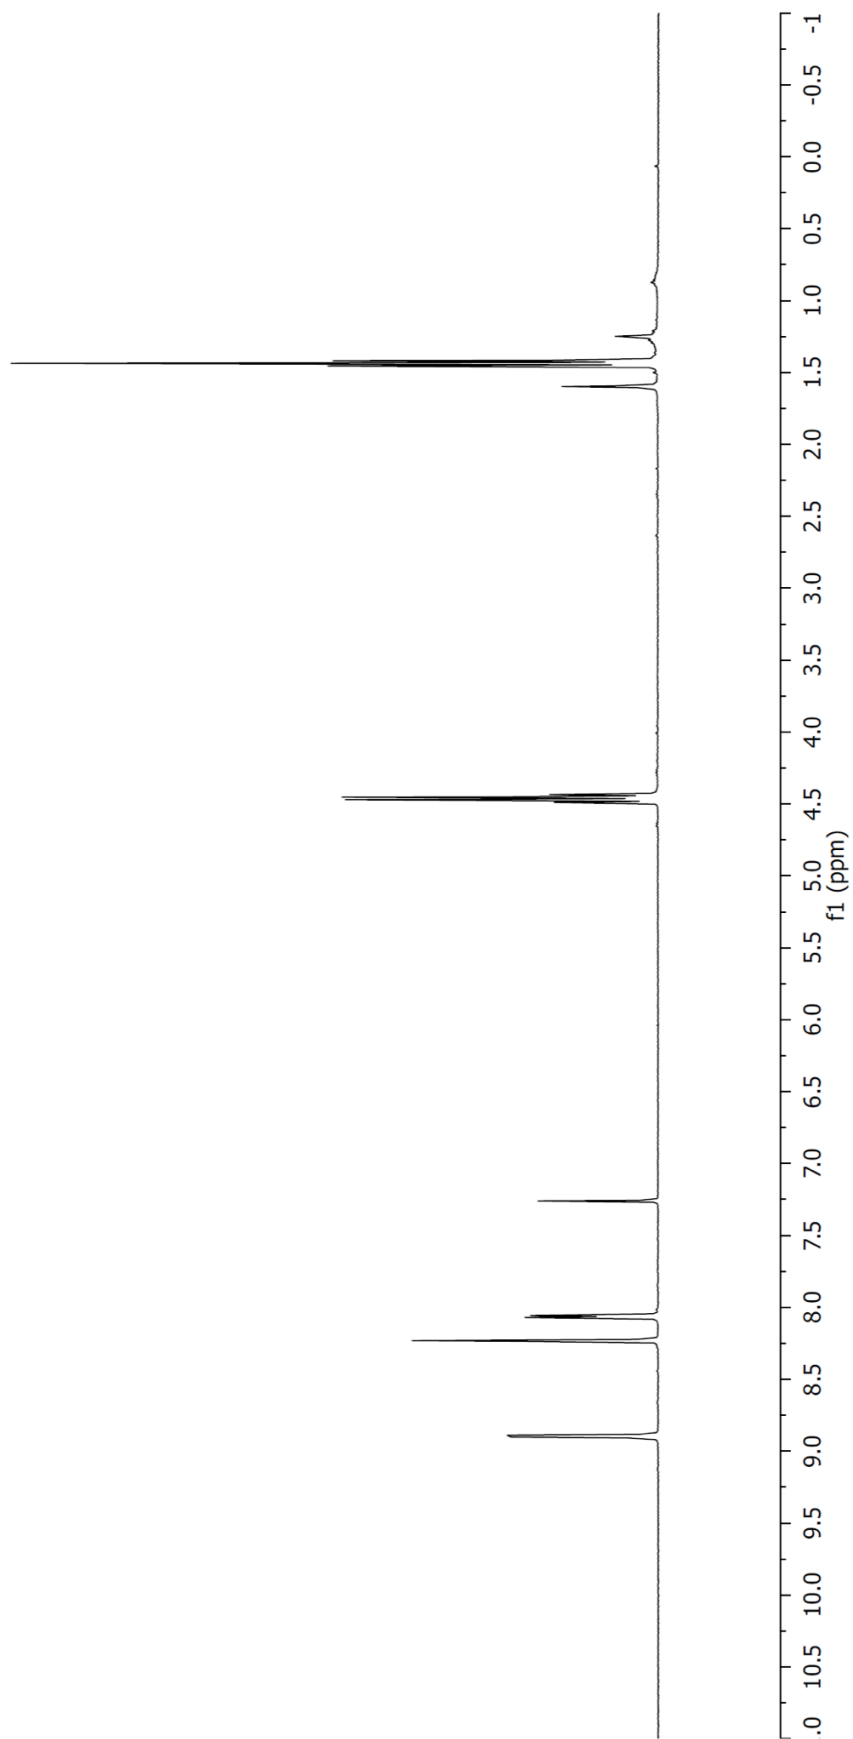



COOEt

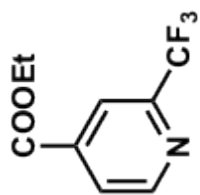

Compound 4-C2  
13C NMR, 150 MHz

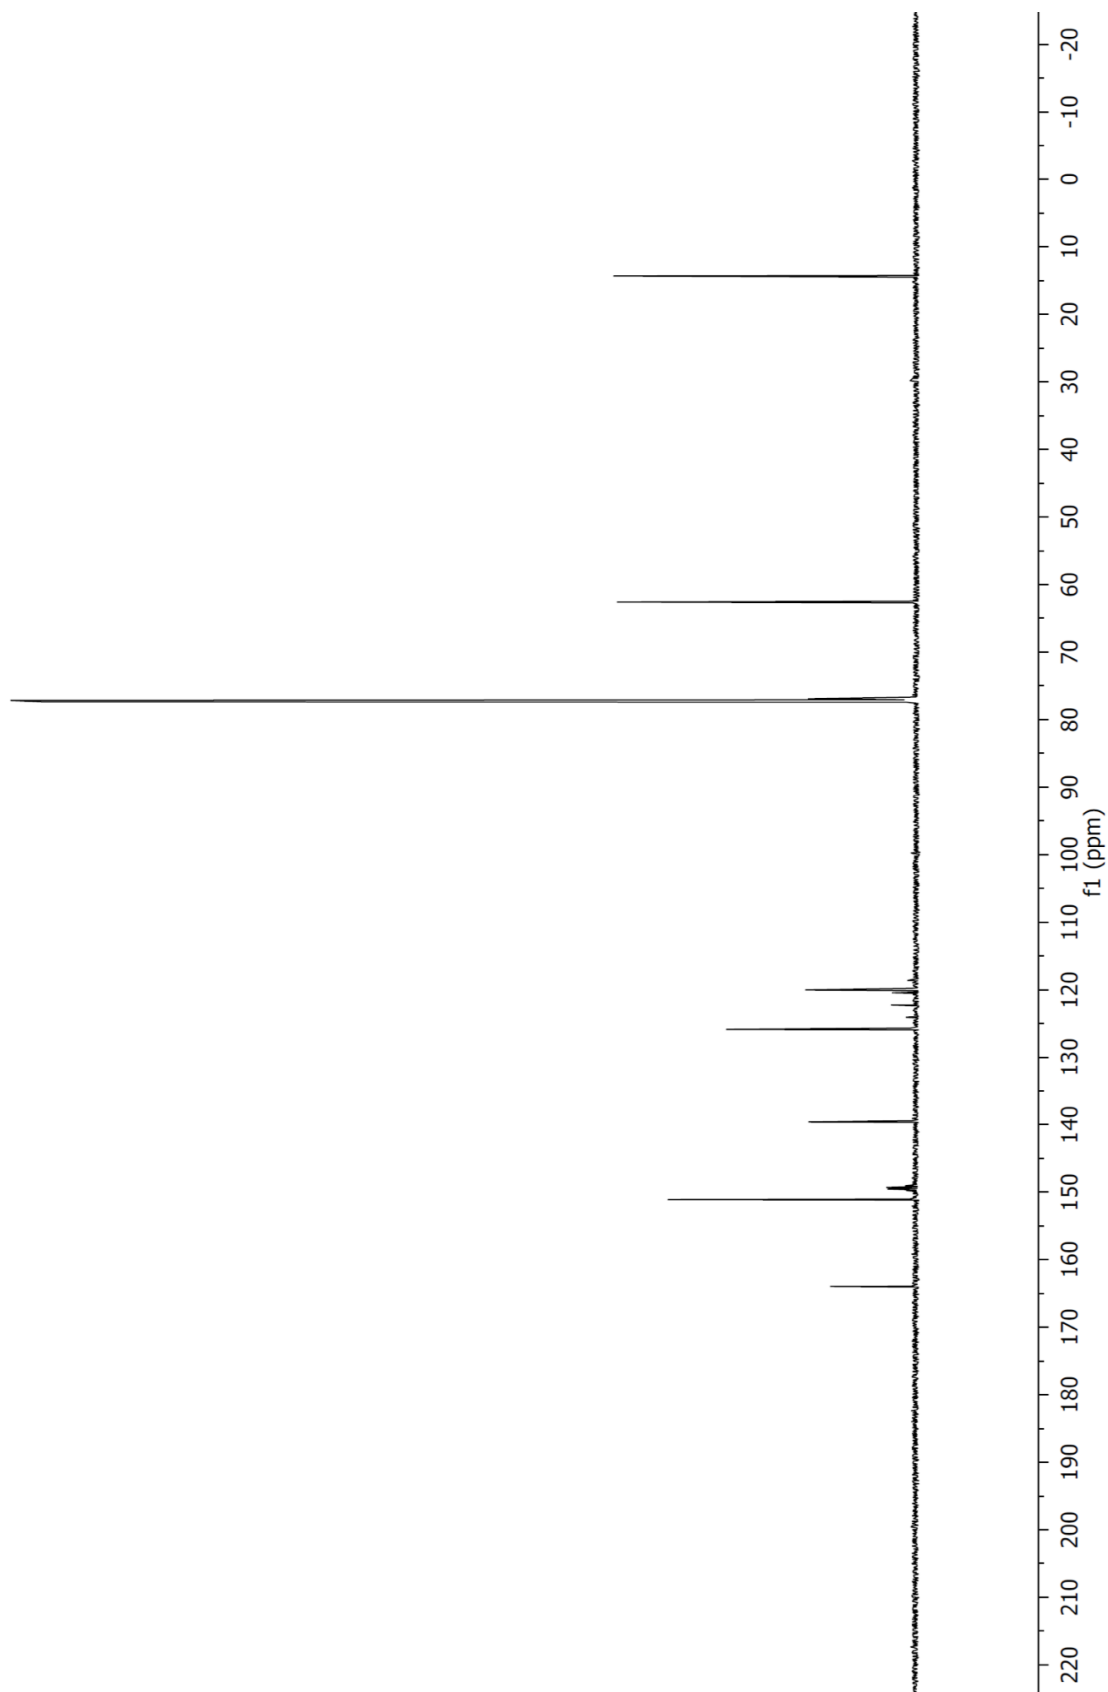

COOEt

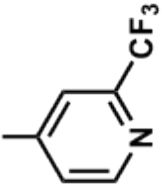

Compound 4-C2  
19F NMR, 376 MHz

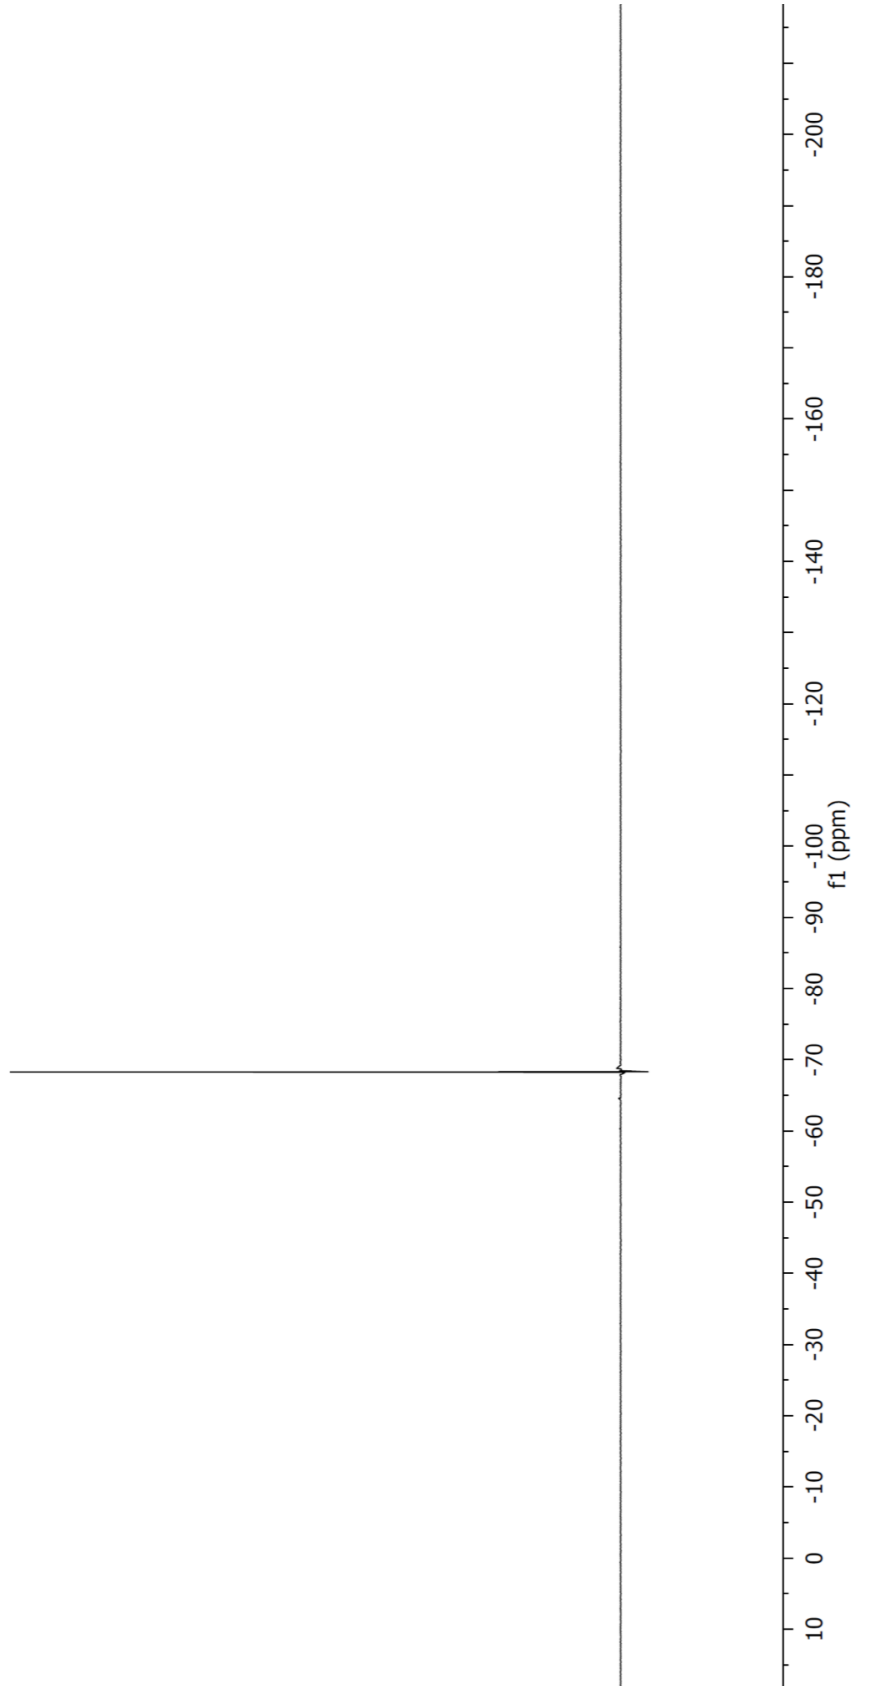

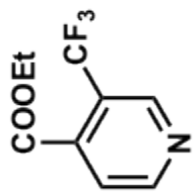

Compound 4-C3  
1H NMR, 400 MHz

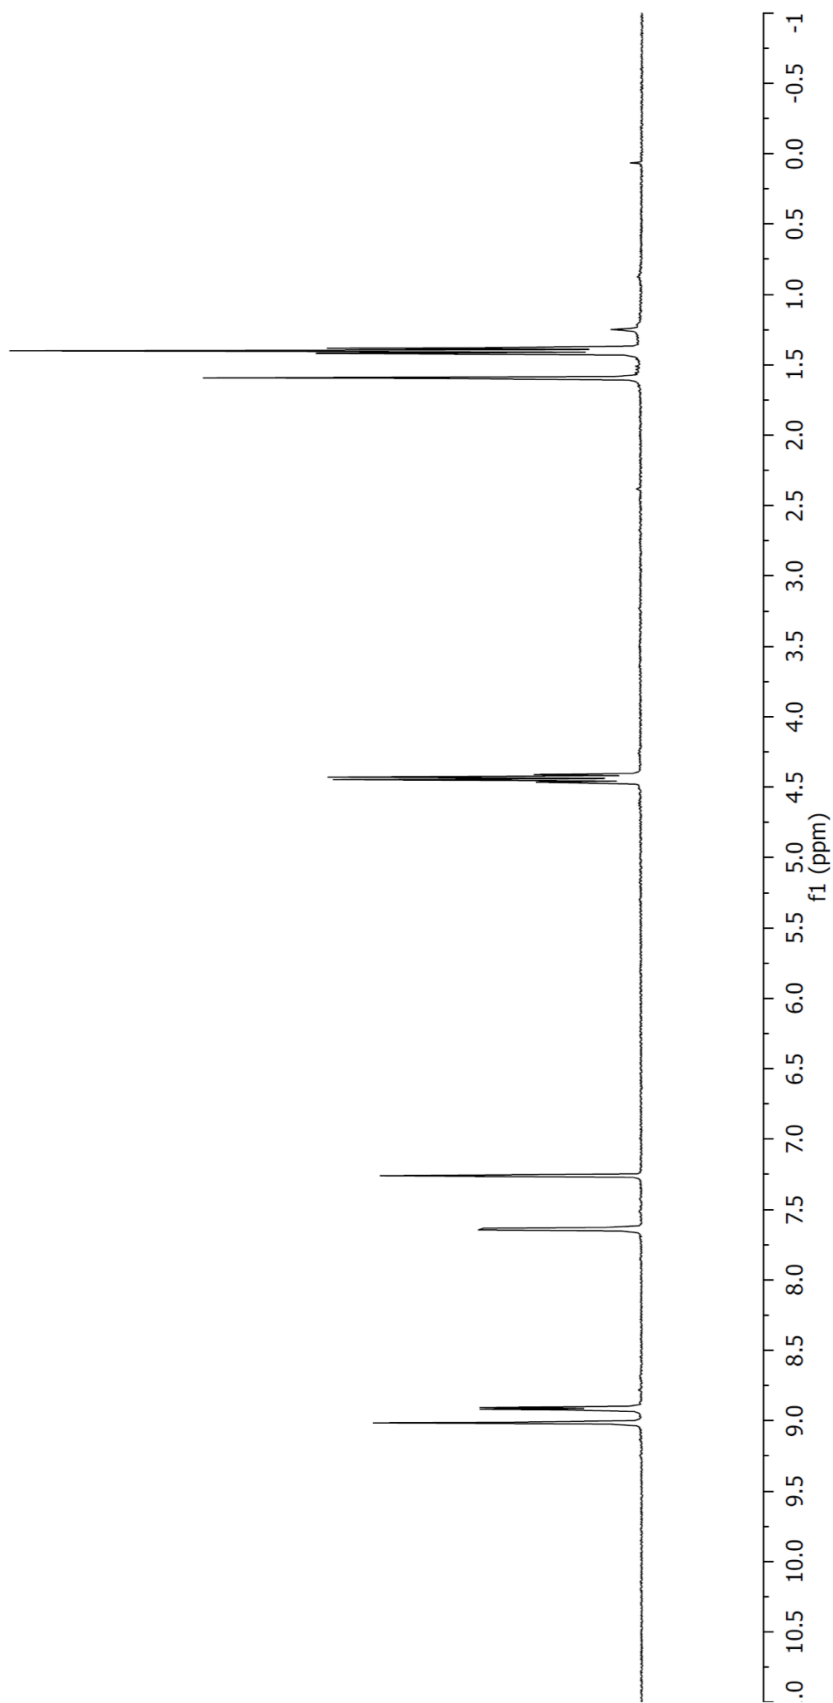

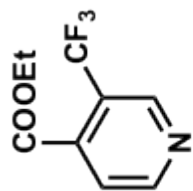

Compound 4-C3  
13C NMR, 150 MHz

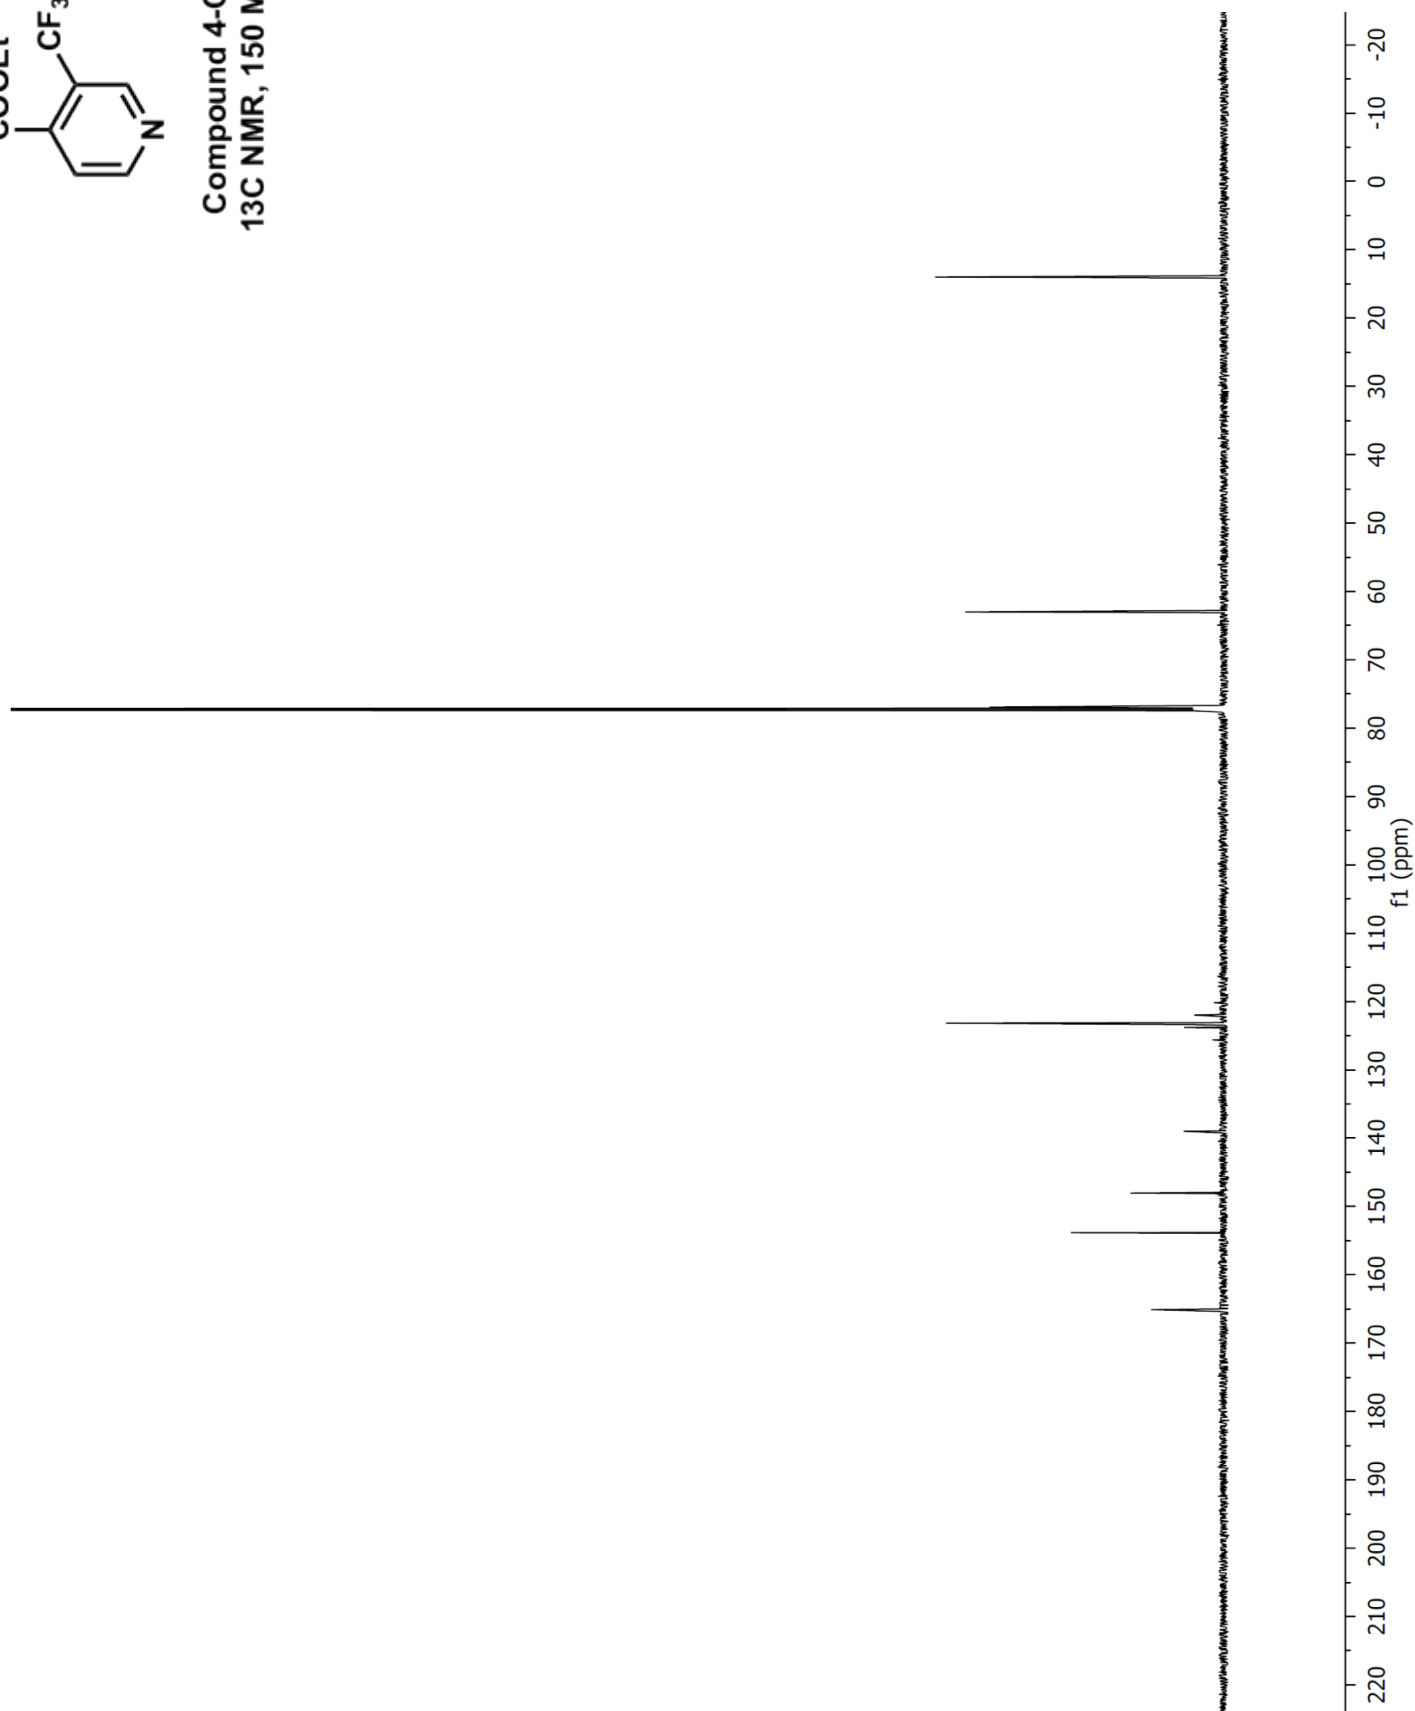

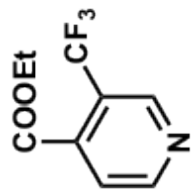

Compound 4-C3  
19F NMR, 376 MHz

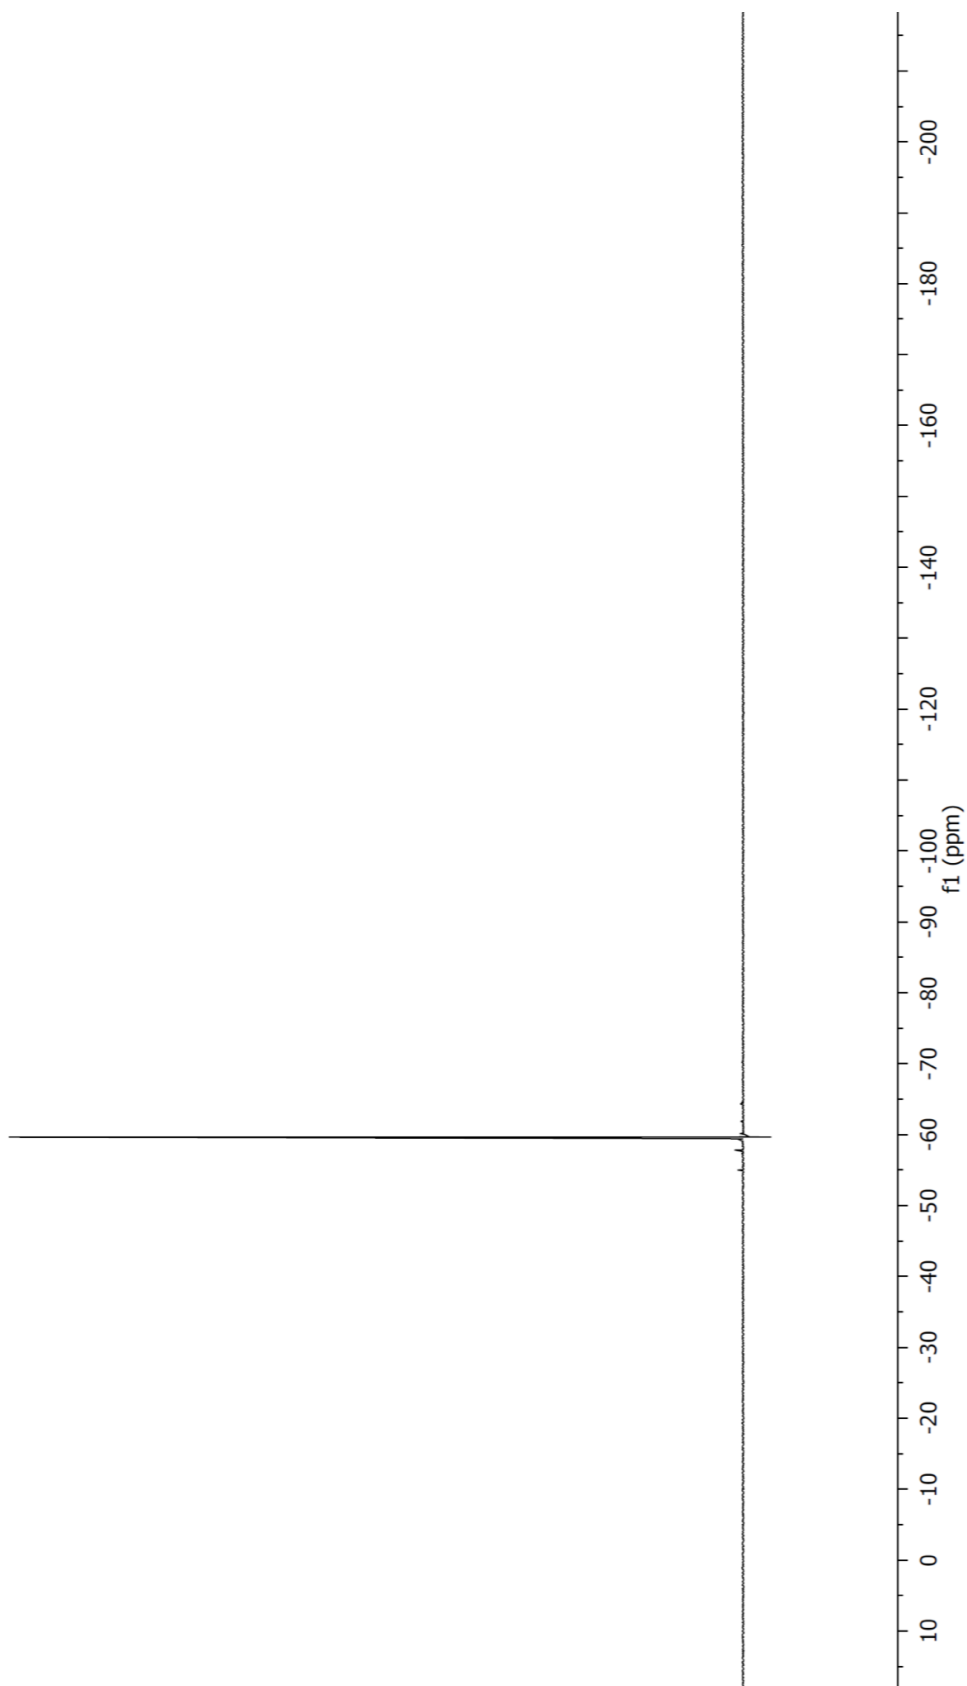

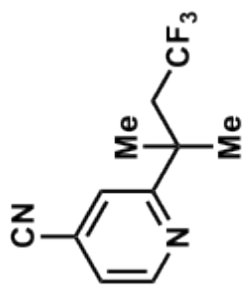

Compound 5A  
1H NMR, 400 MHz

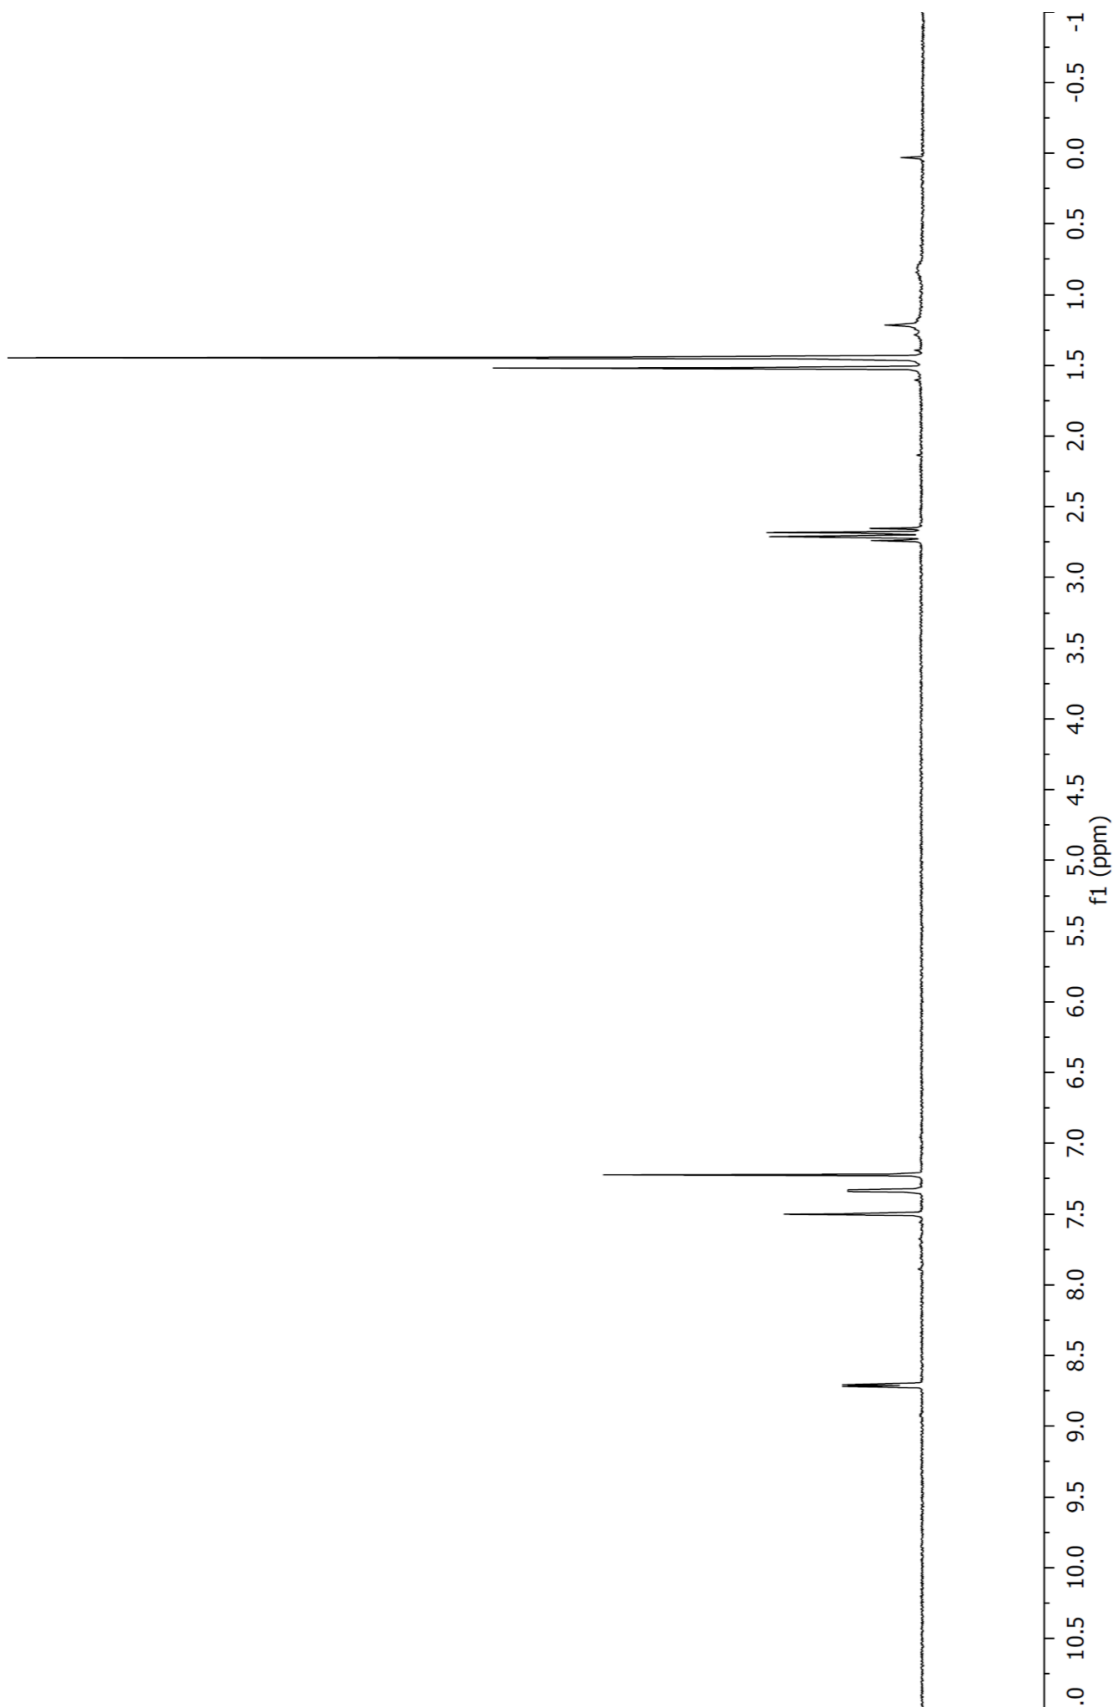

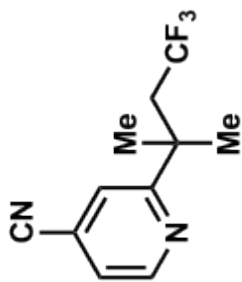

Compound 5A  
13C NMR, 150 MHz

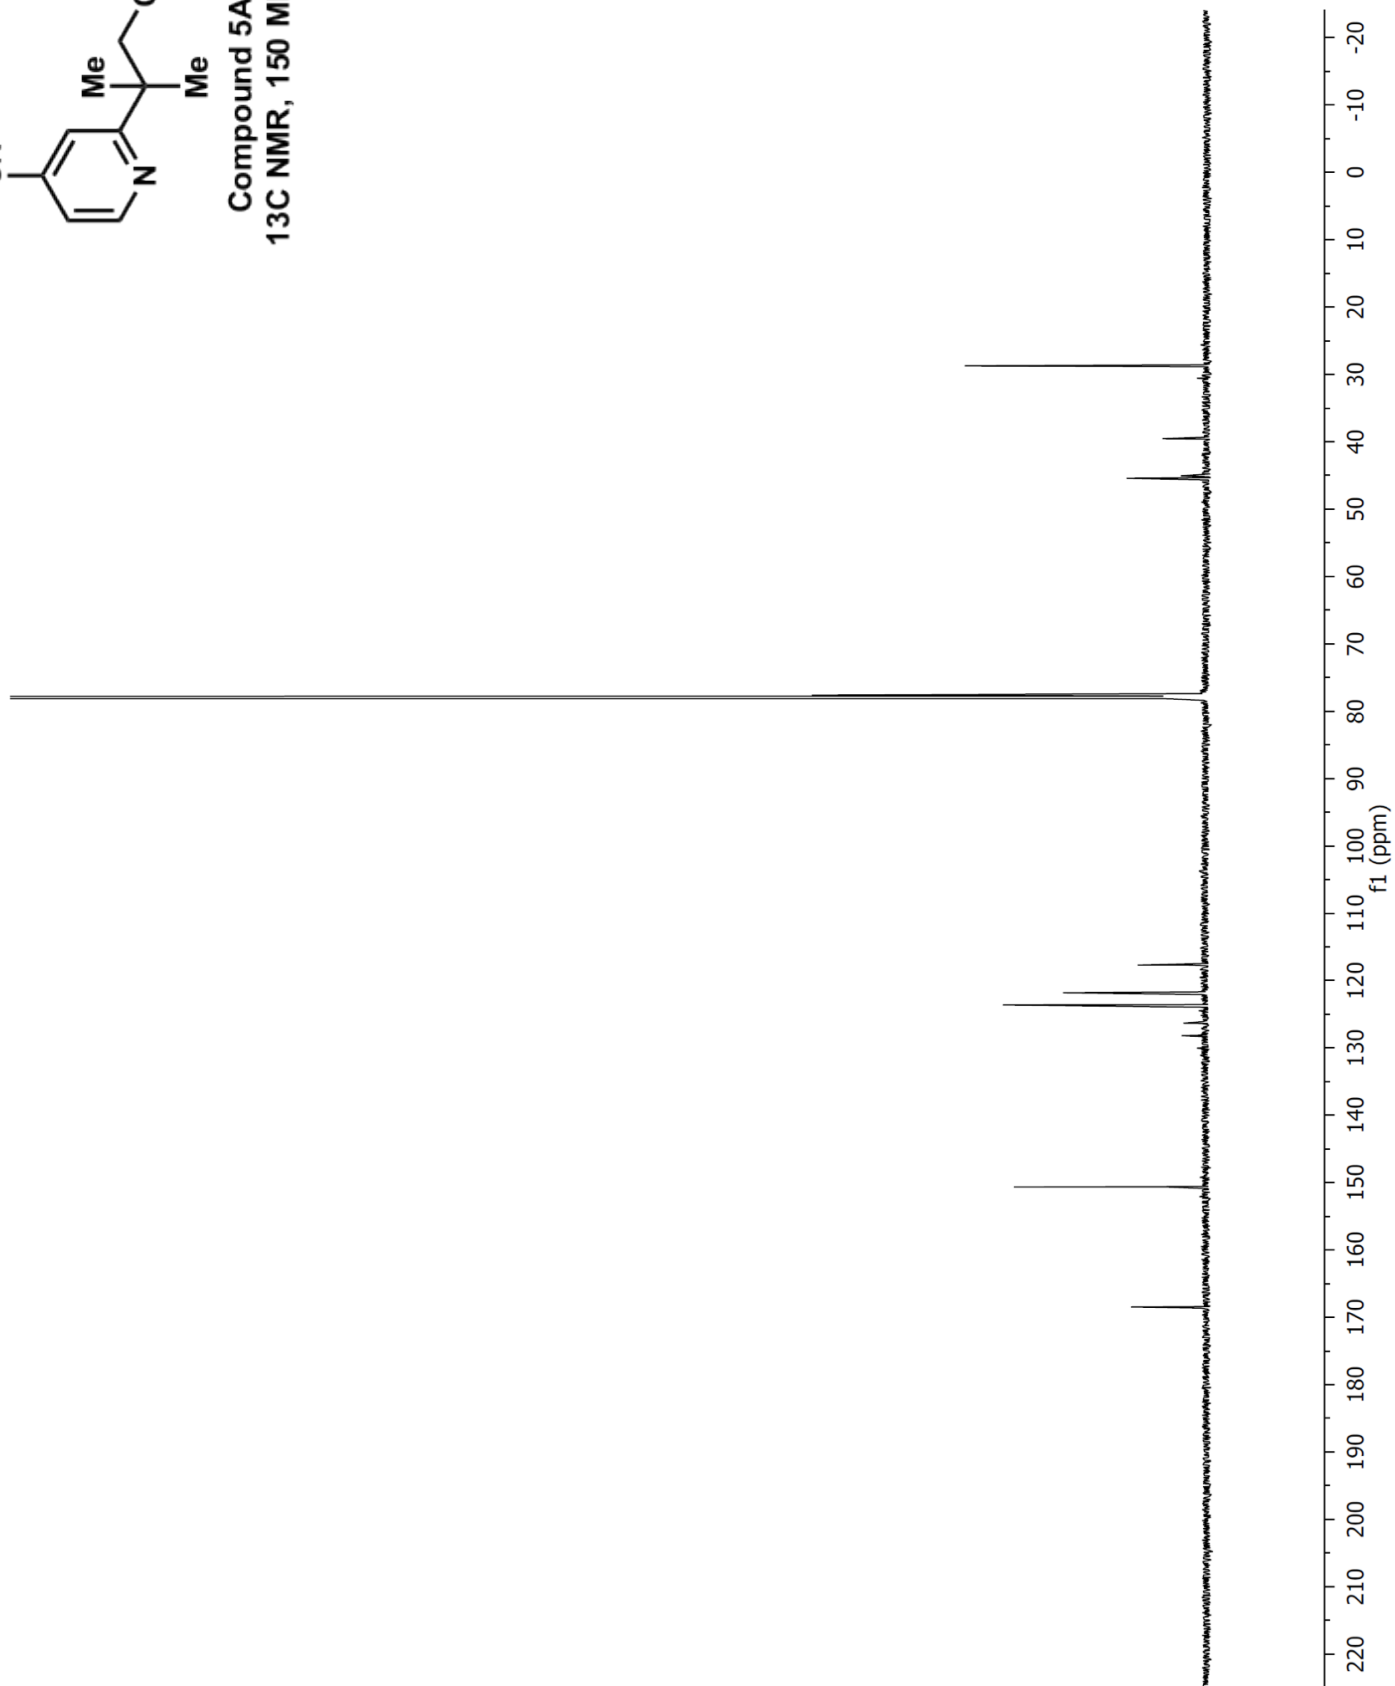

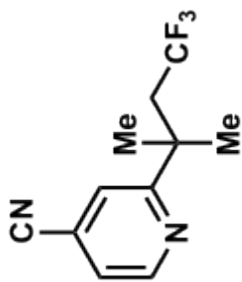

Compound 5A  
19F NMR, 376 MHz

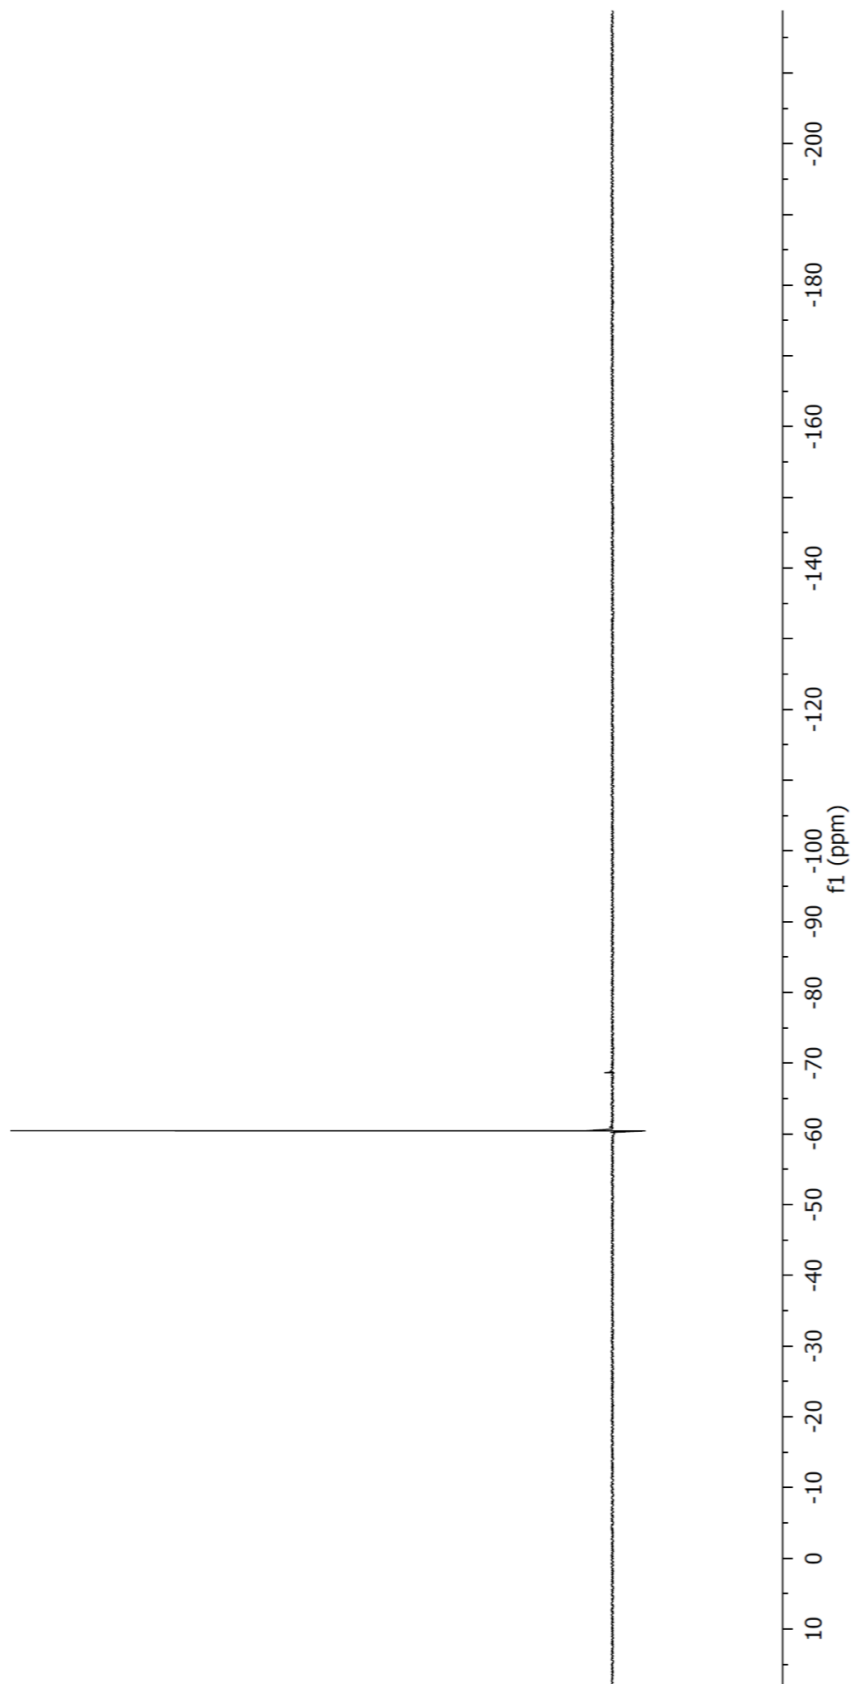



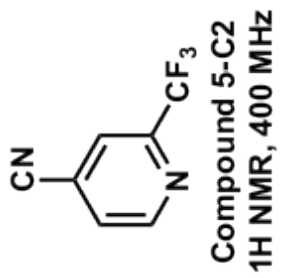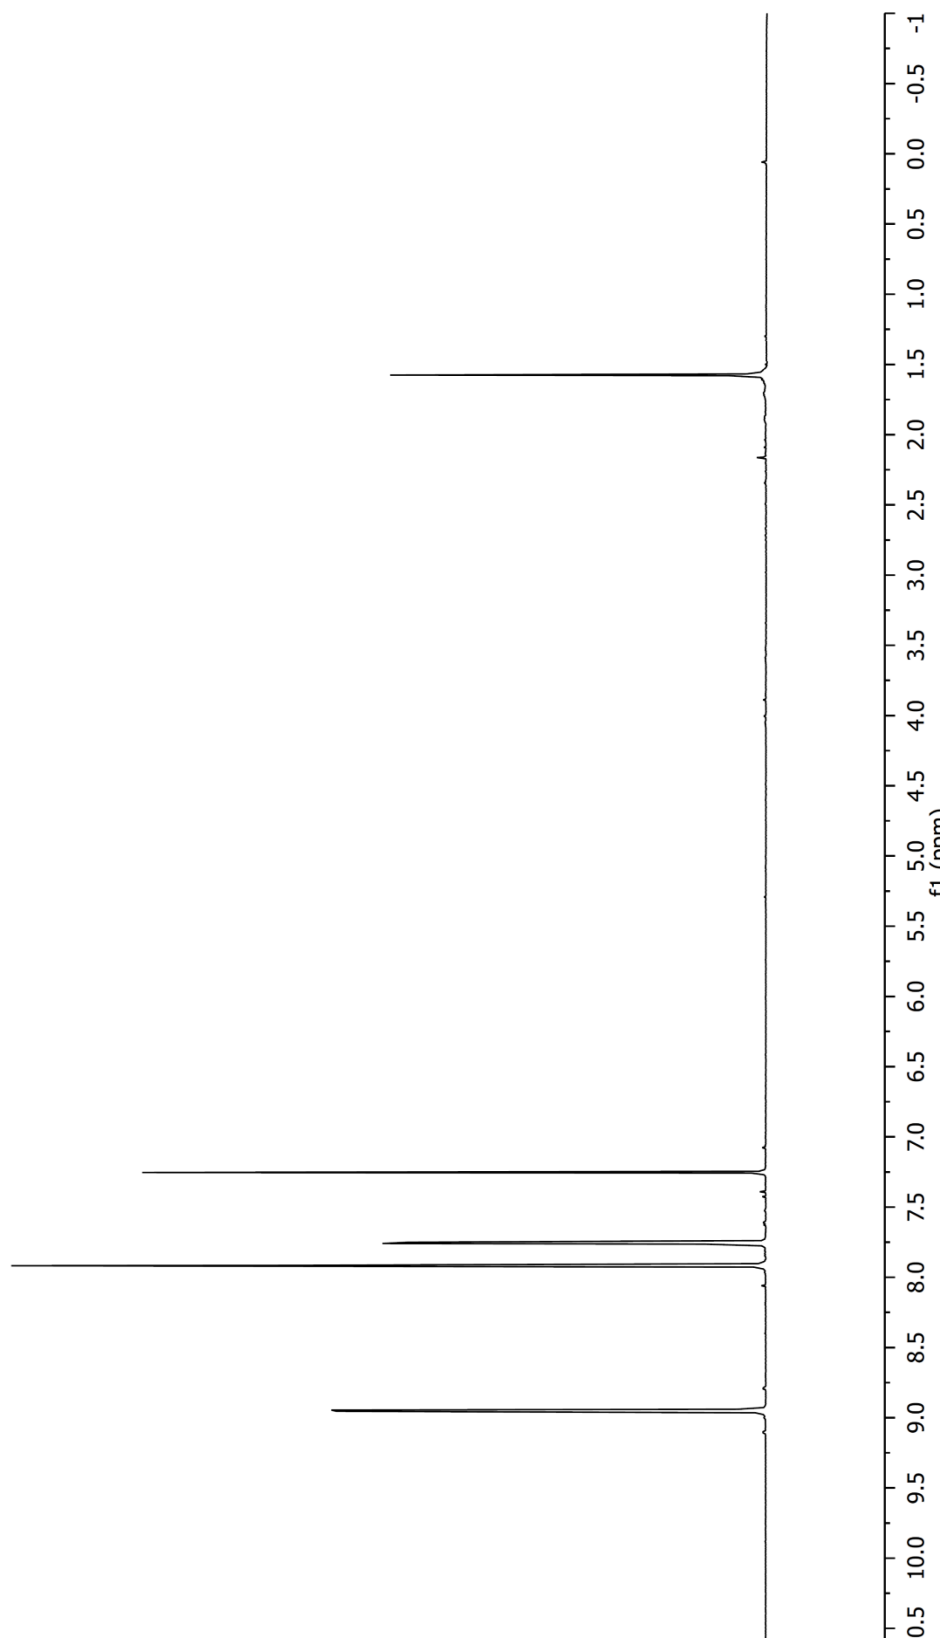

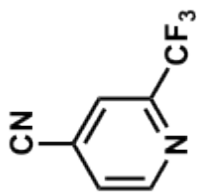

Compound 5-C2  
13C NMR, 150 MHz

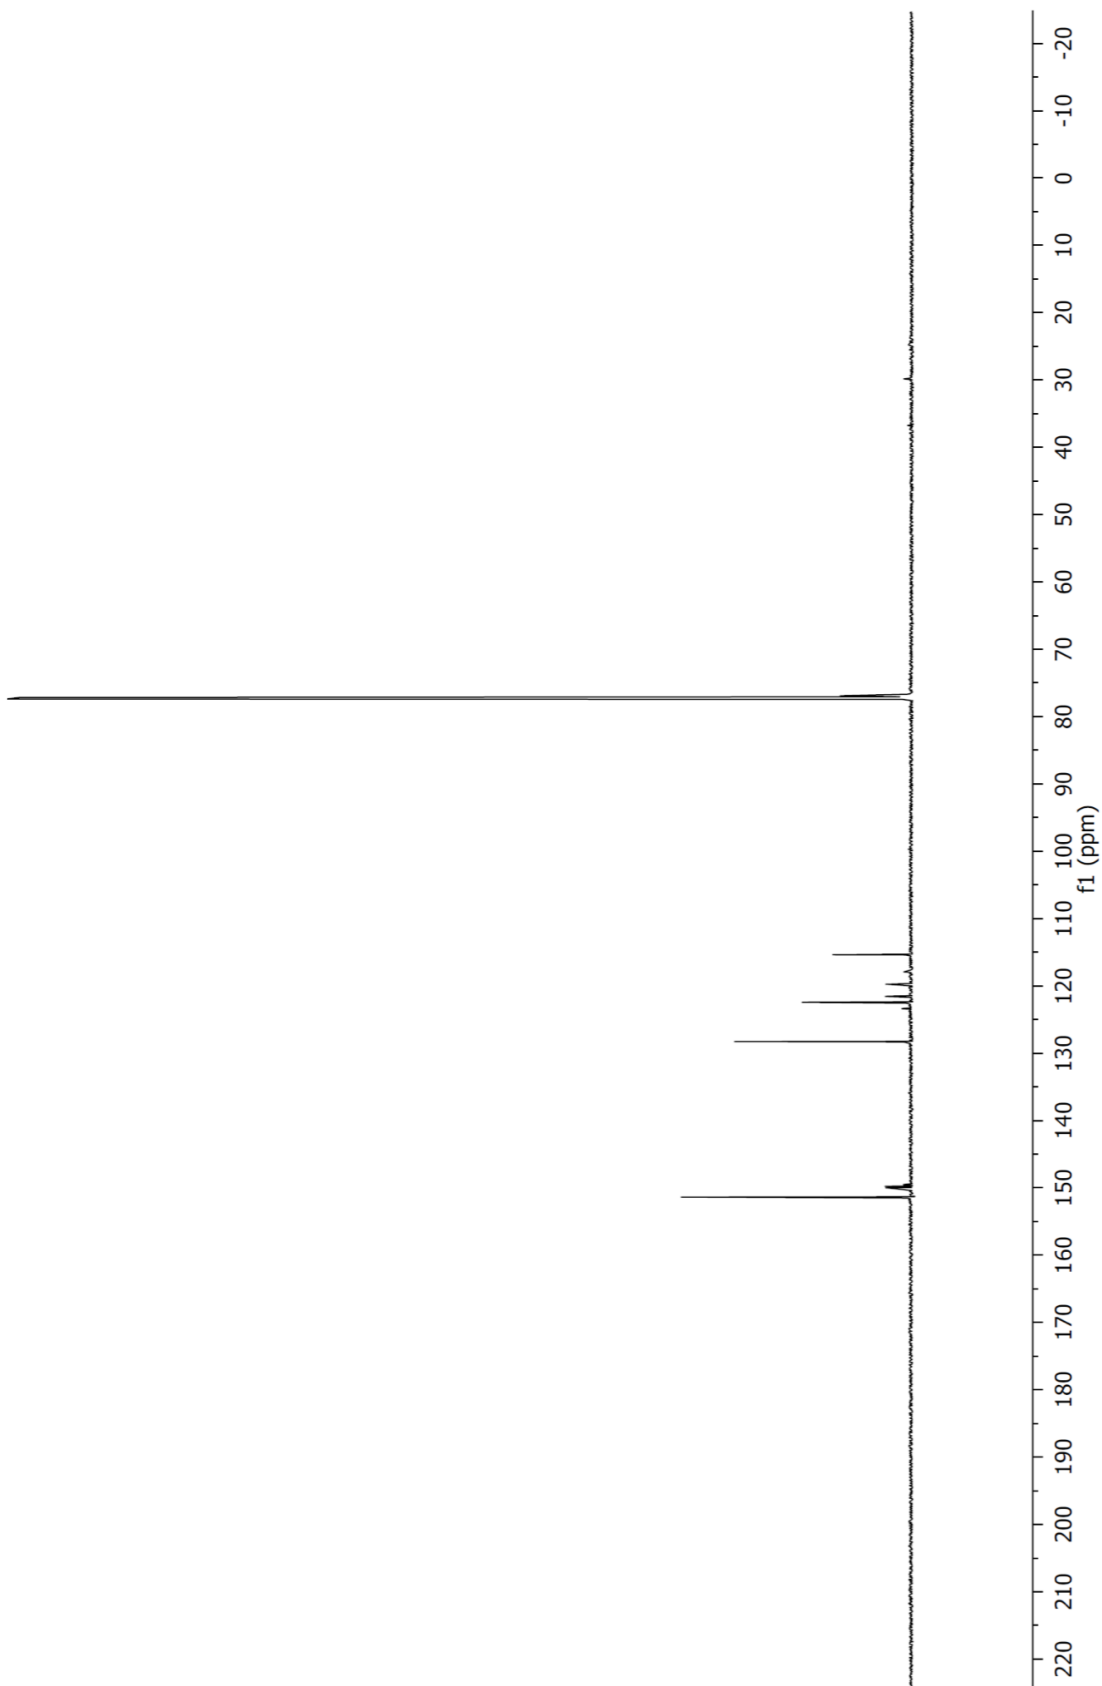

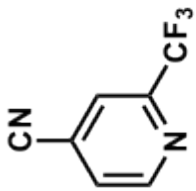

Compound 5-C2  
19F NMR, 376 MHz

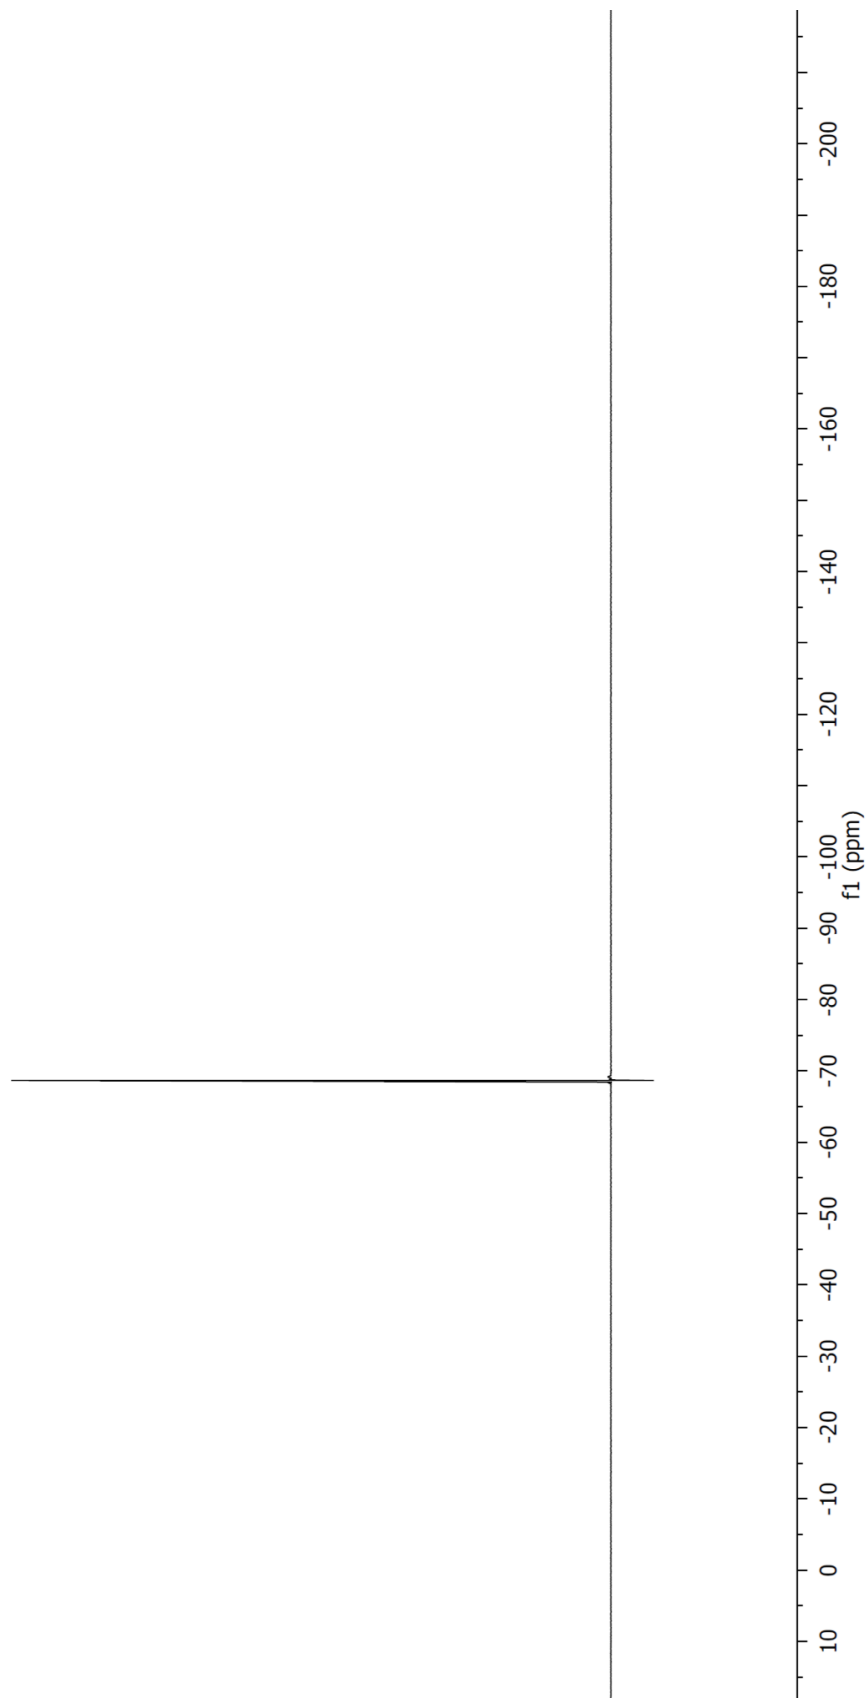

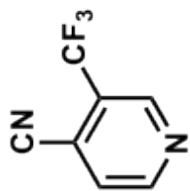

Compound 5-C3  
1H NMR, 400 MHz

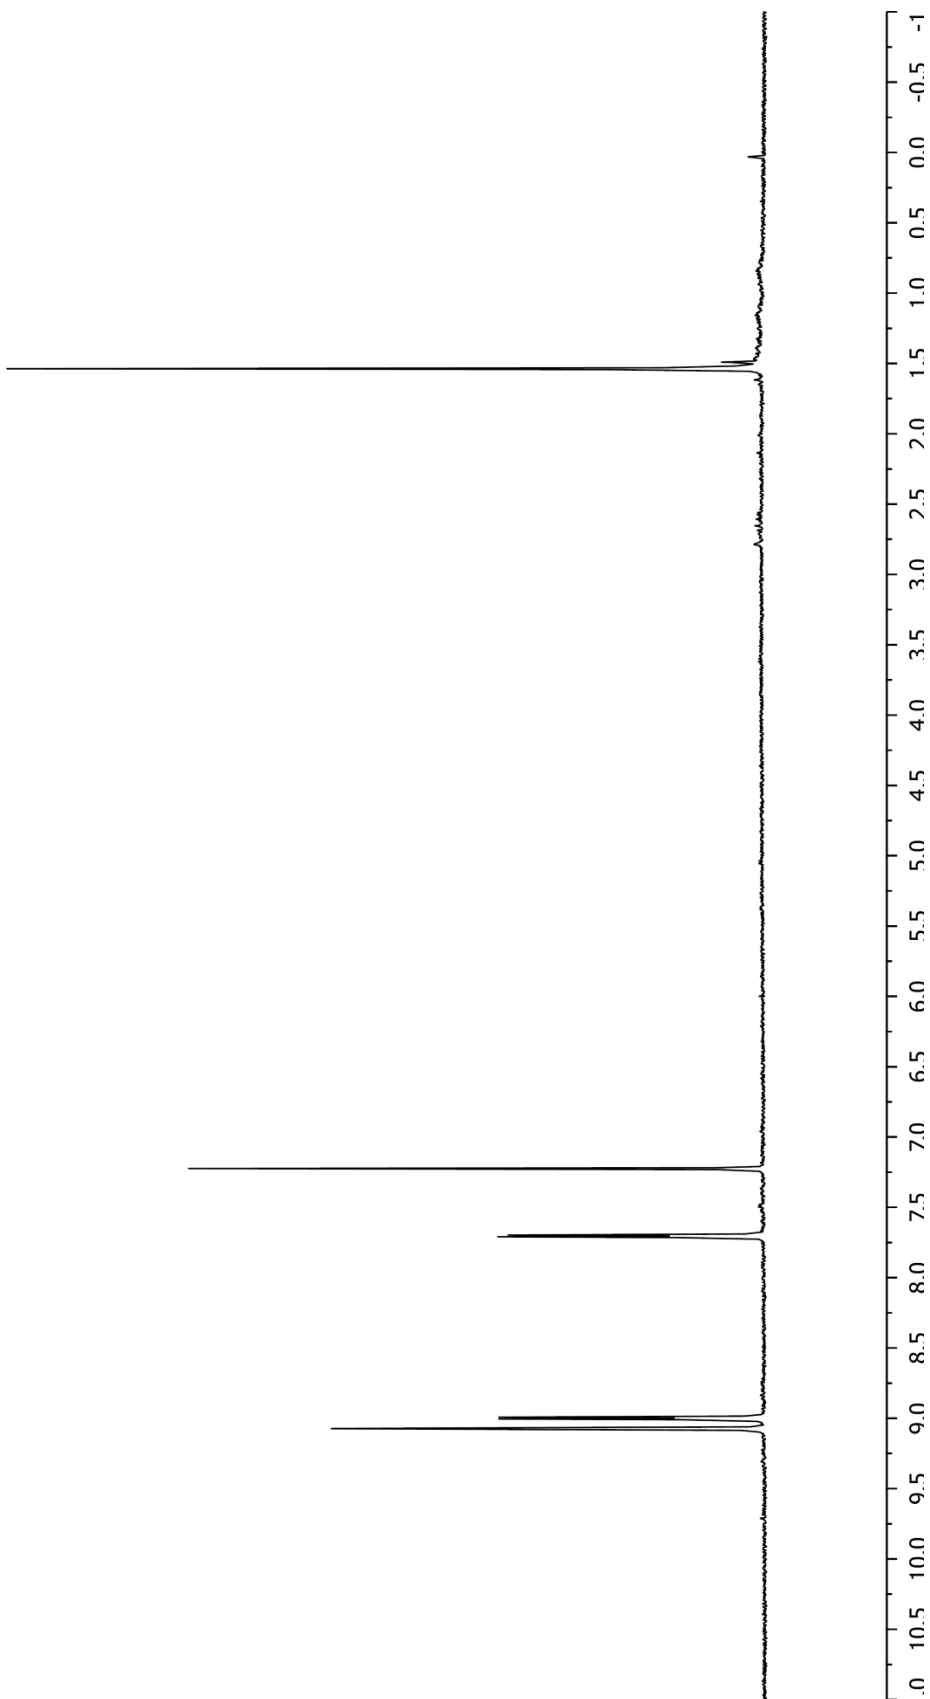

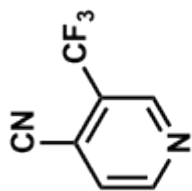

Compound 5-C3  
13C NMR, 150 MHz

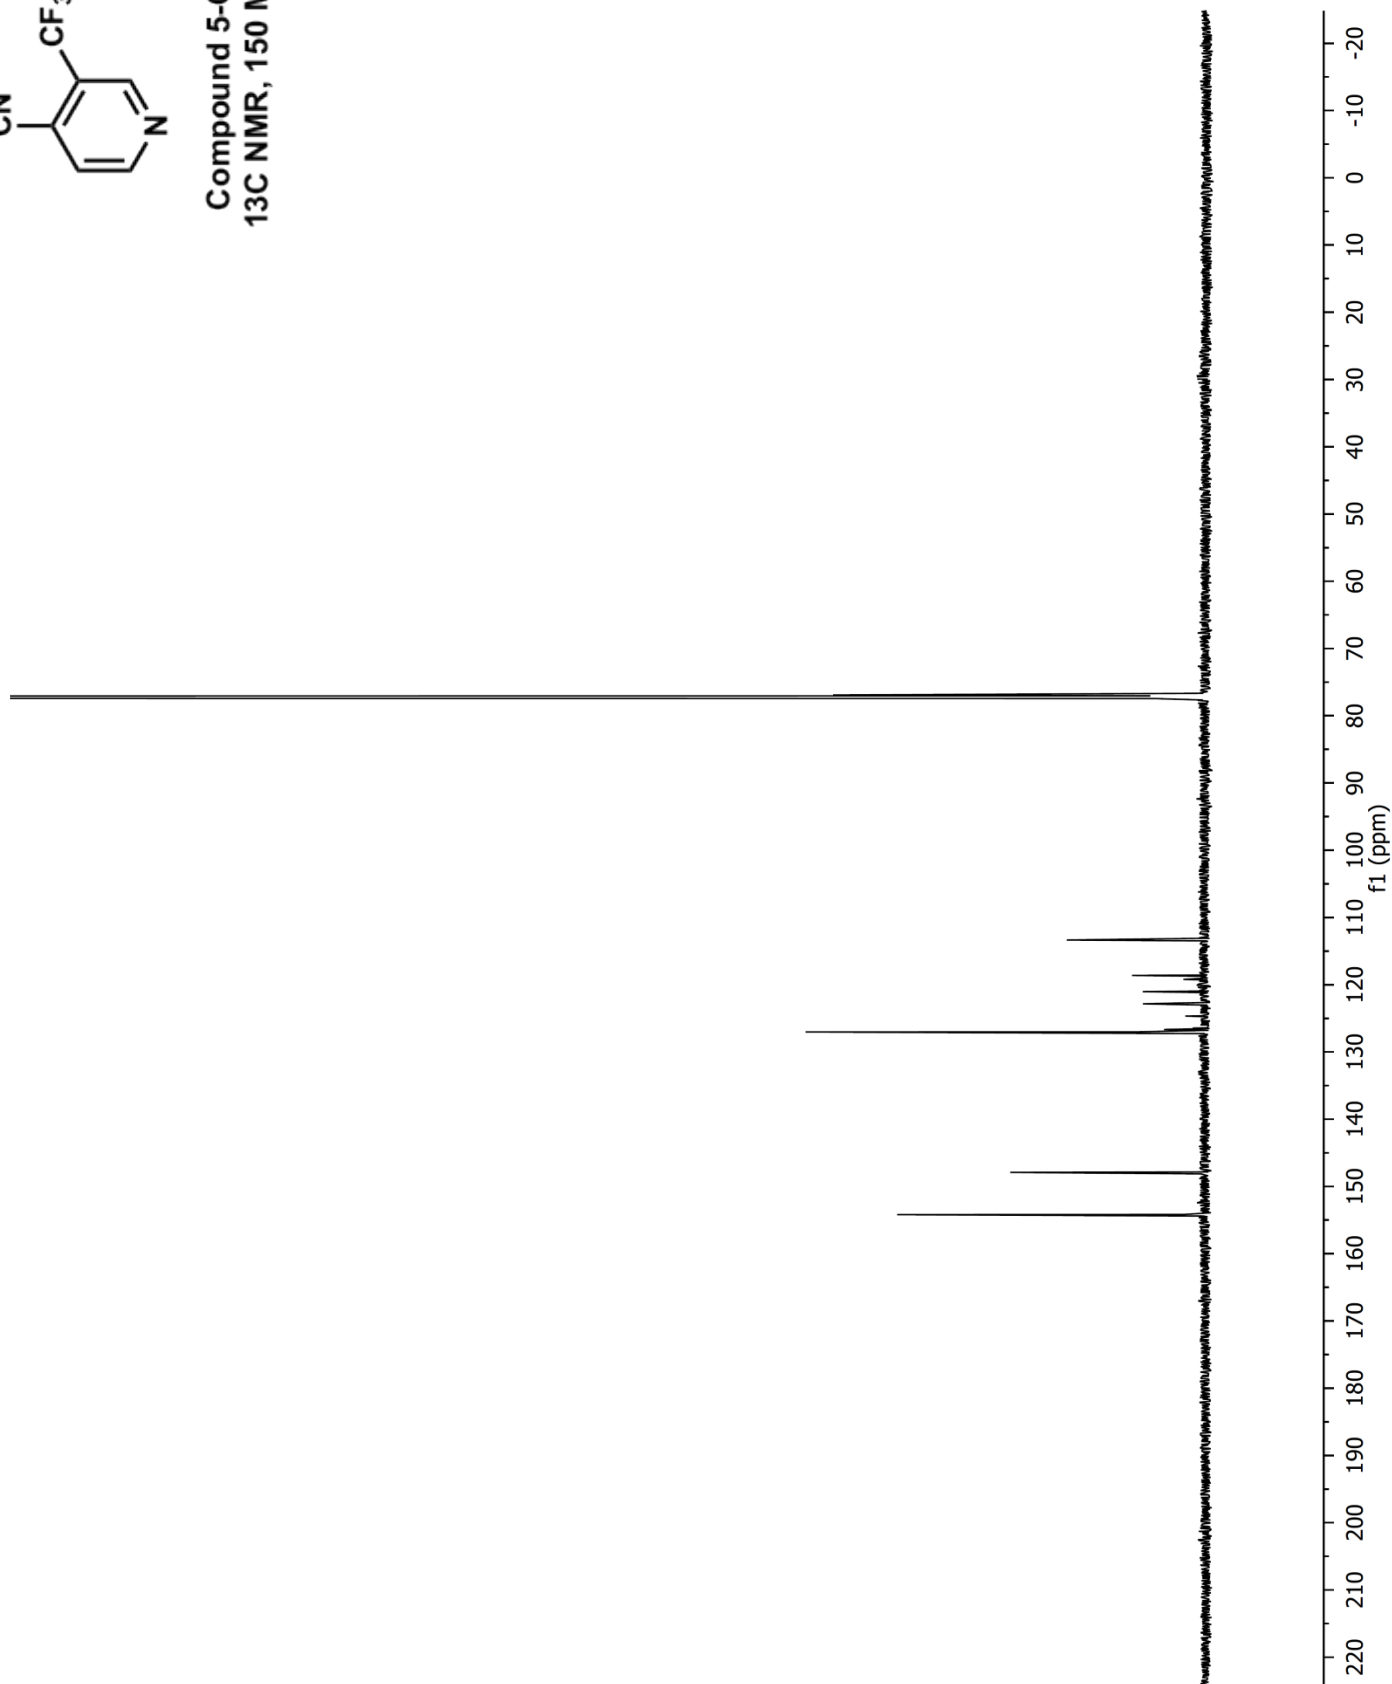

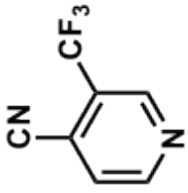

Compound 5-C3  
19F NMR, 376 MHz

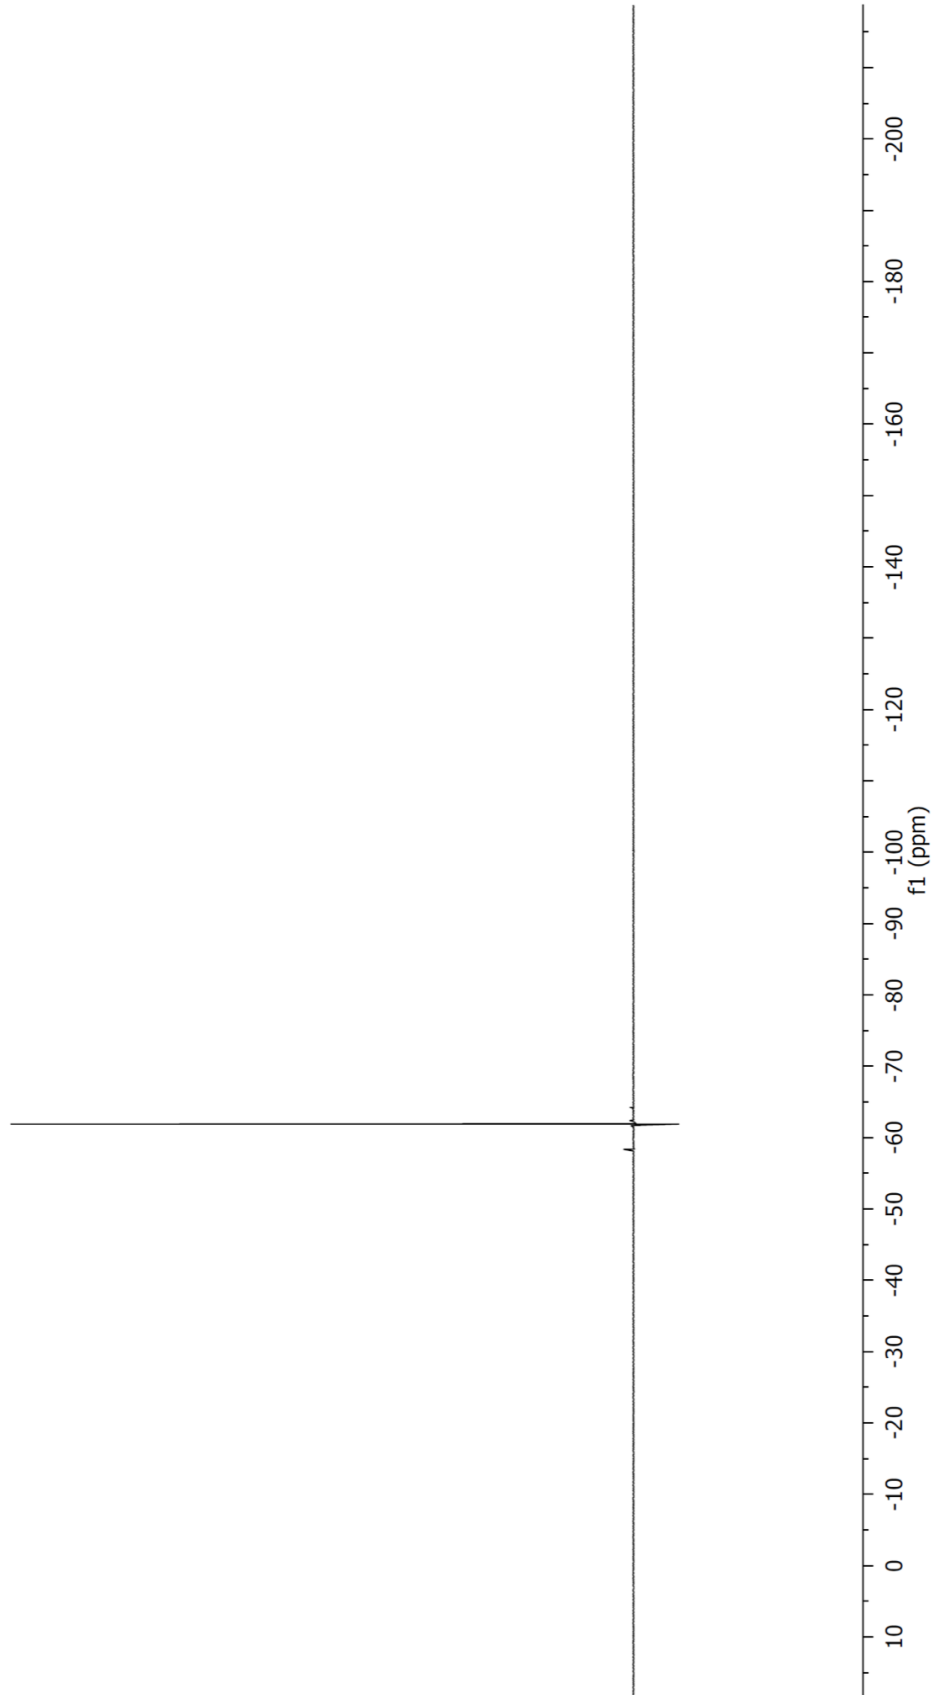

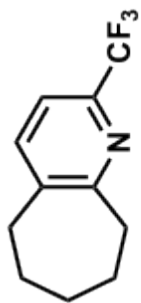

Compound 6-C2  
1H NMR, 400 MHz

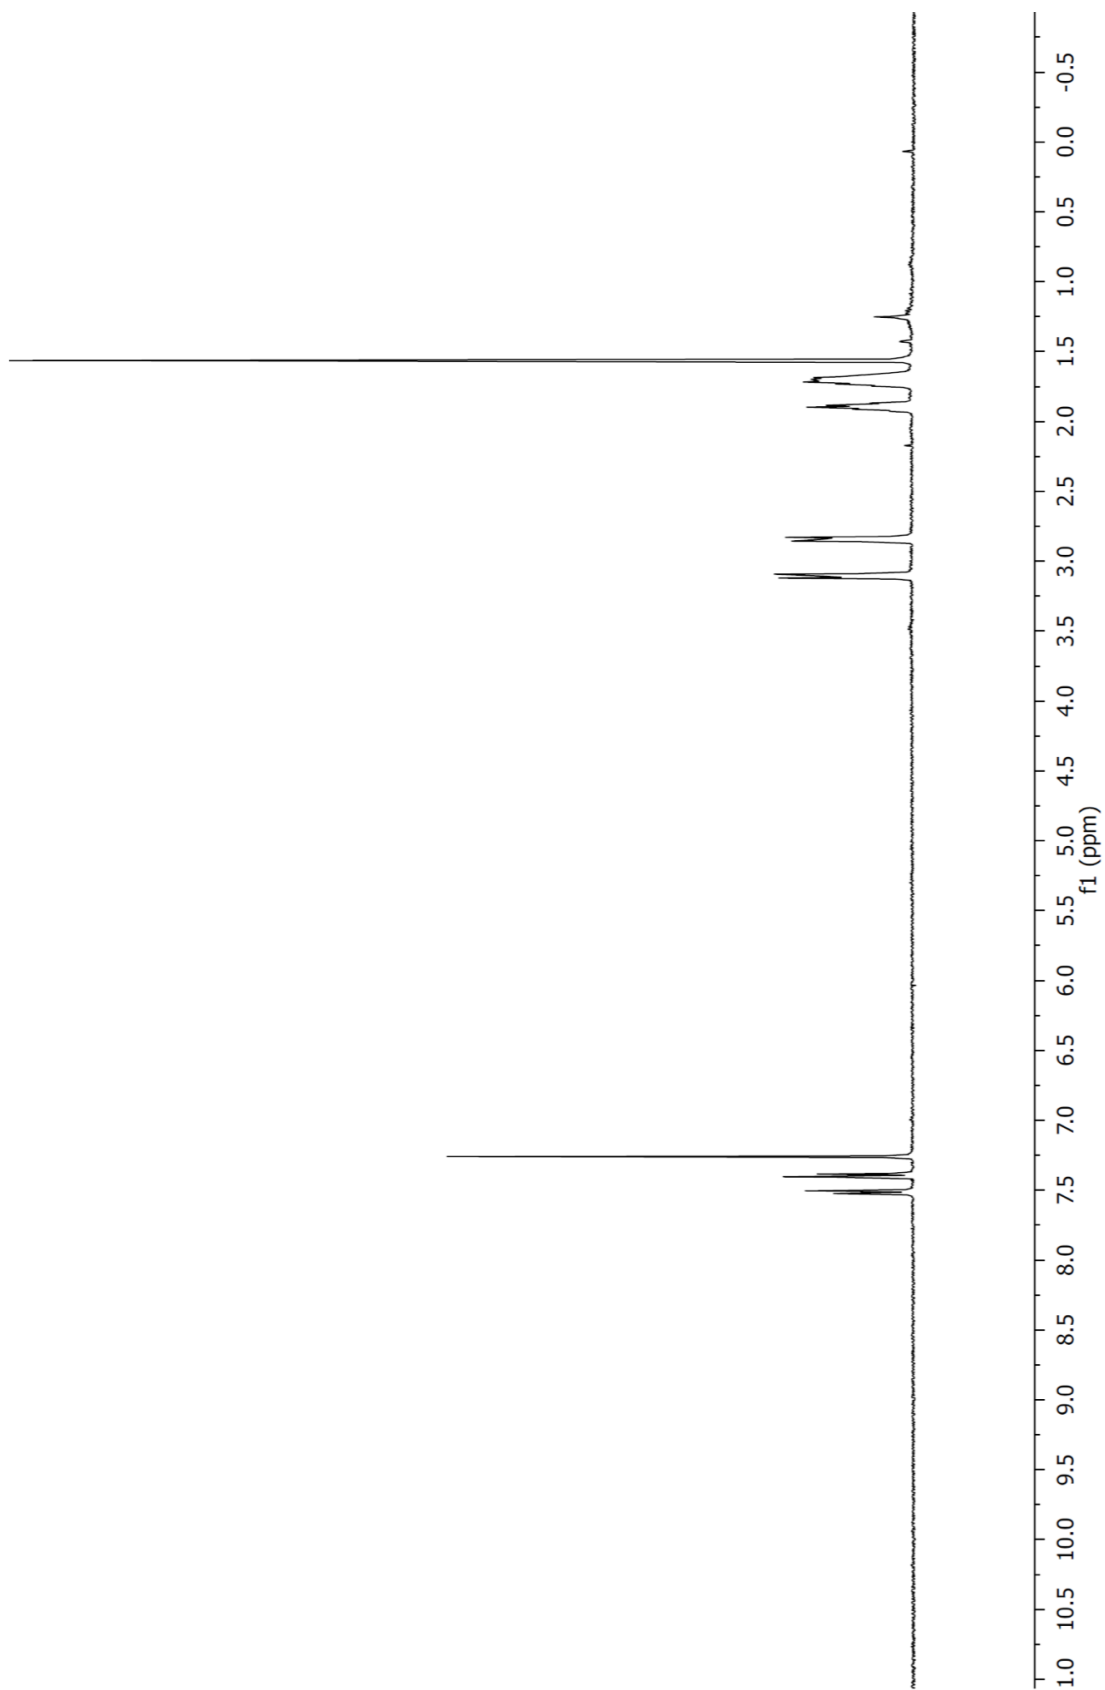

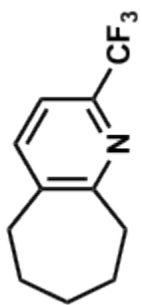

Compound 6-C2  
13C NMR, 150 MHz

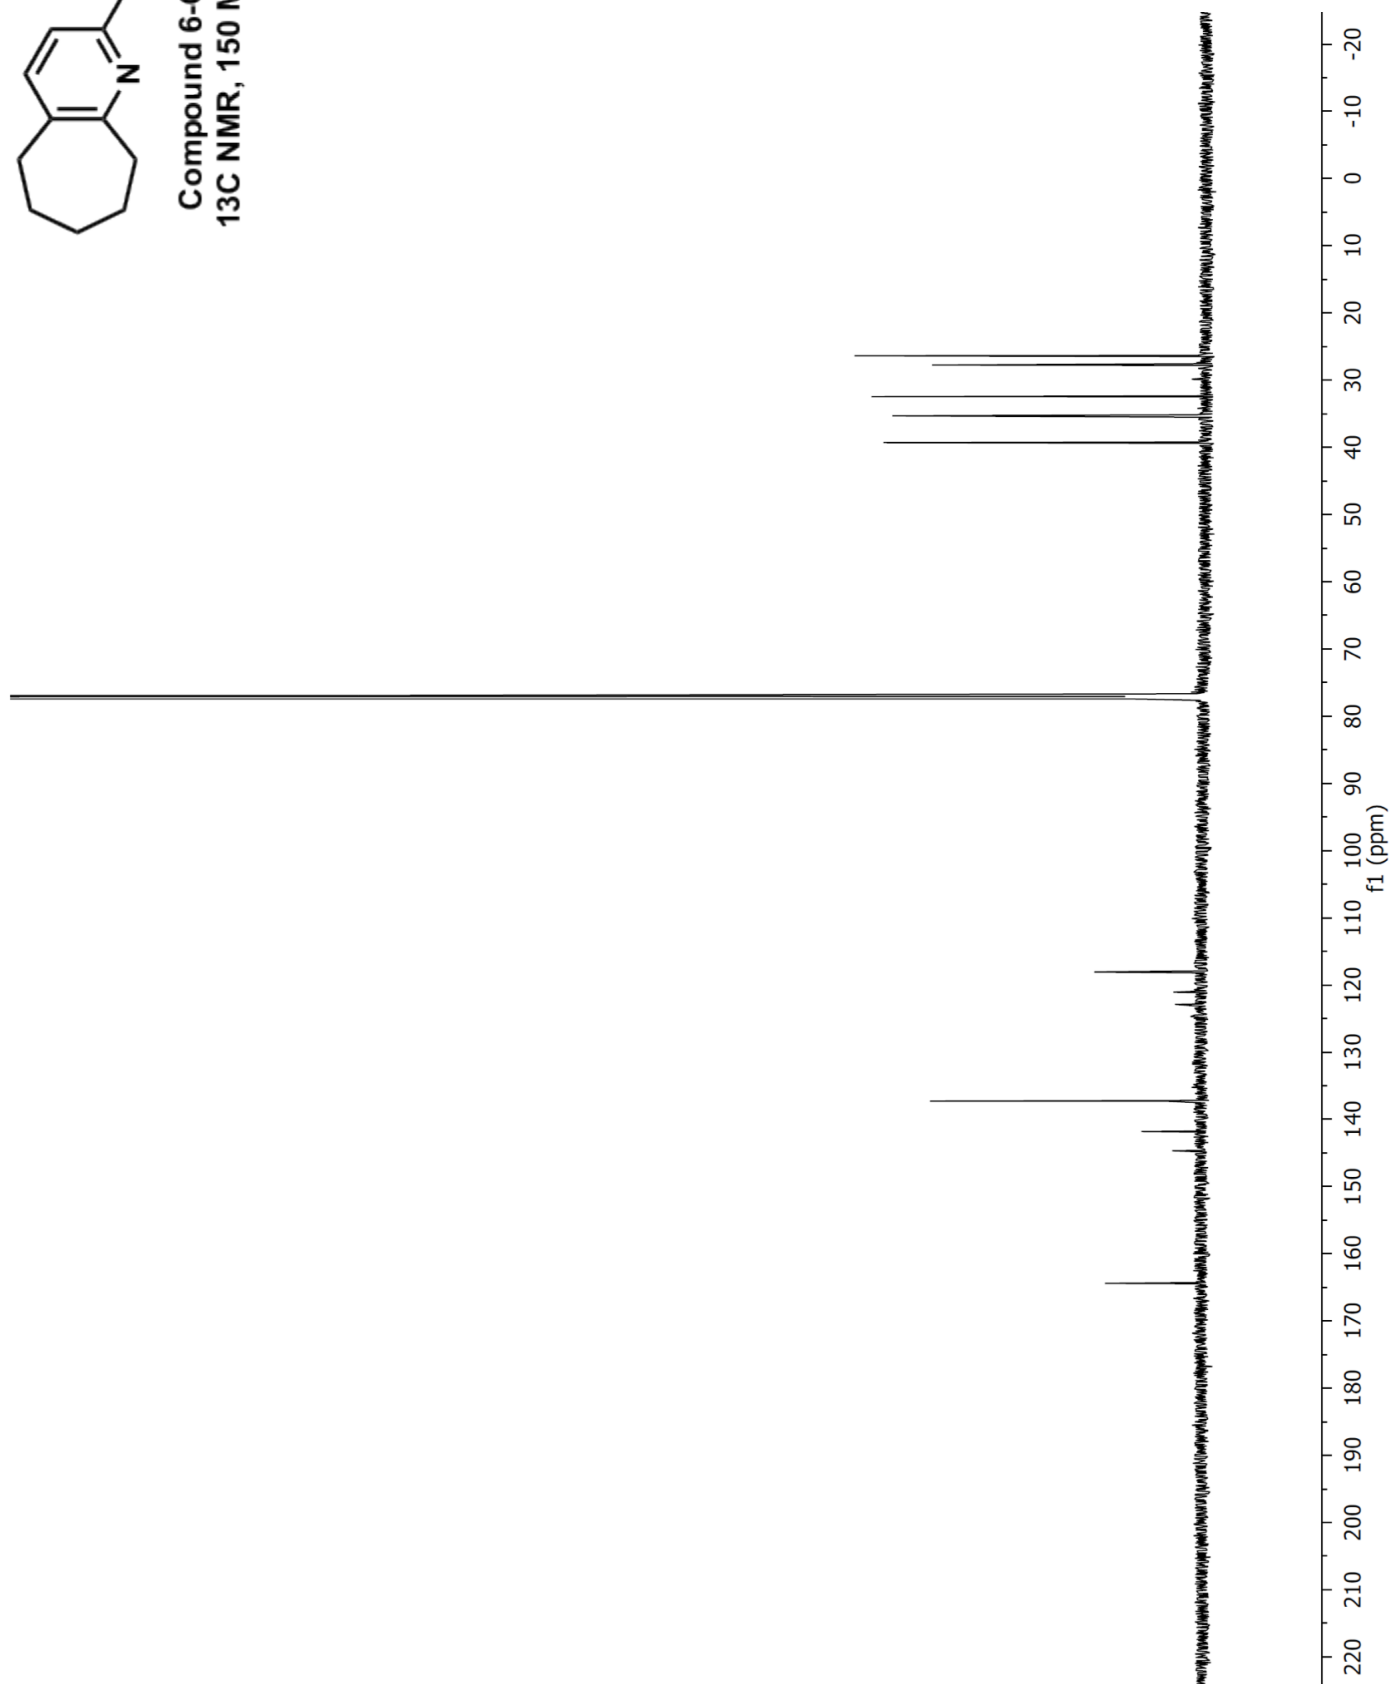



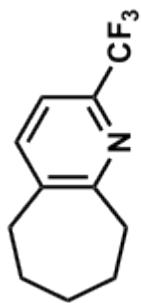

Compound 6-C2  
19F NMR, 376 MHz

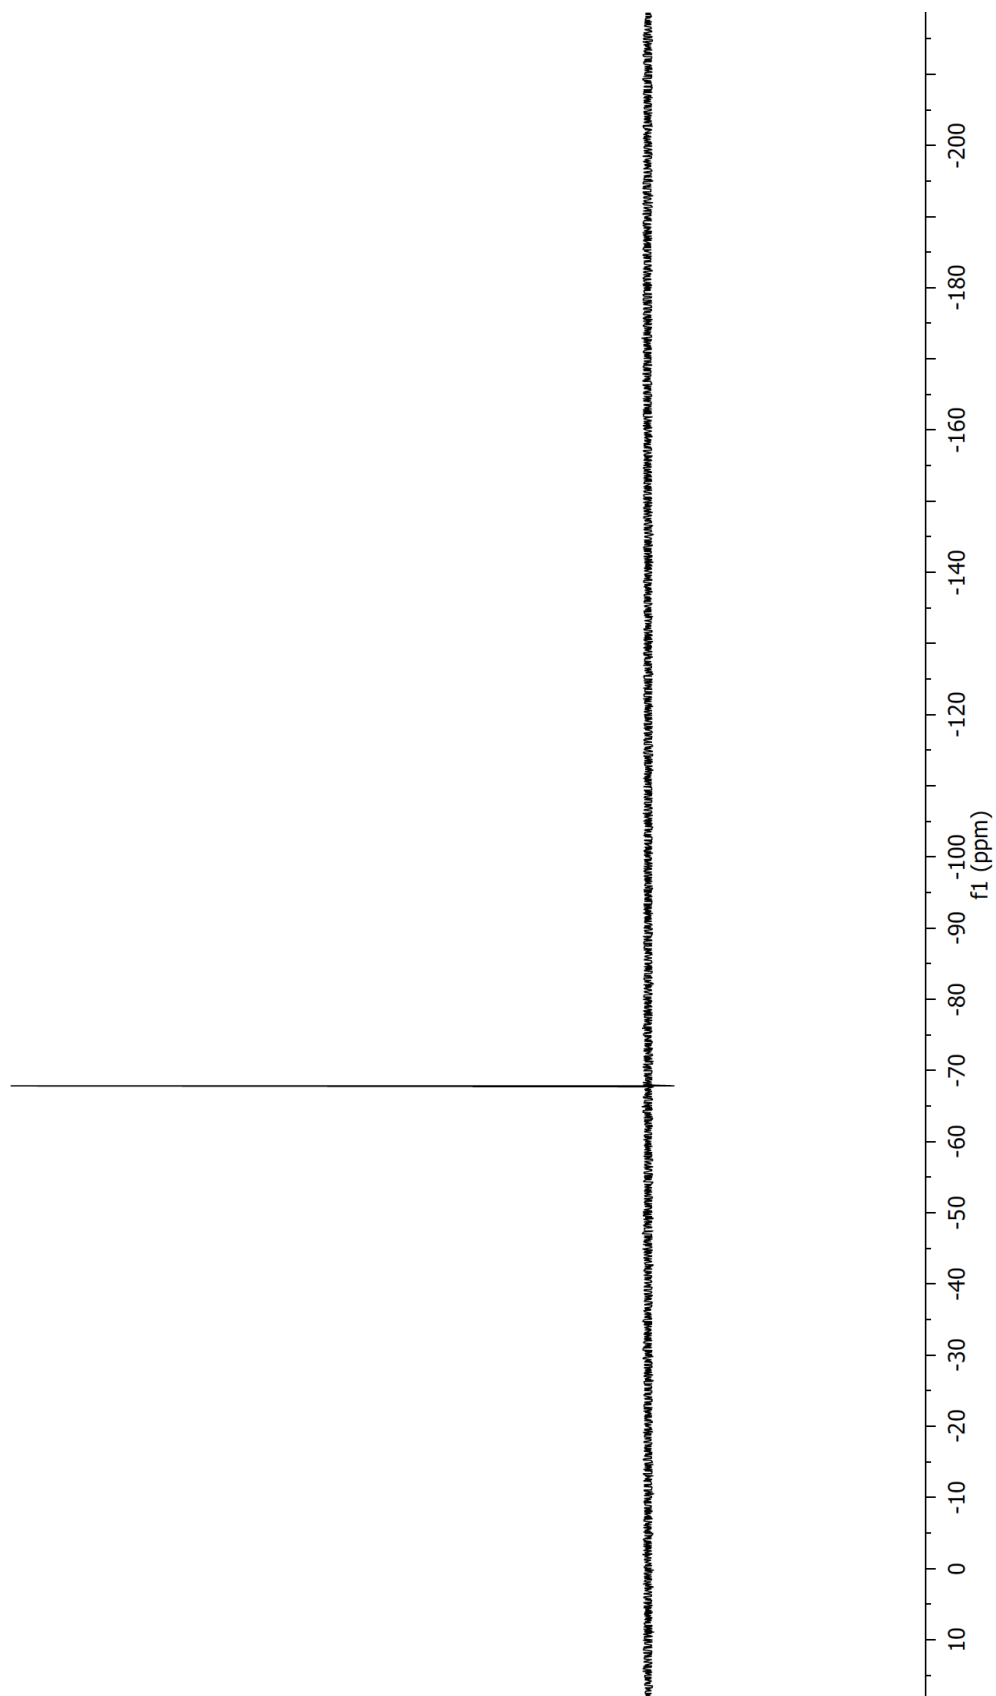

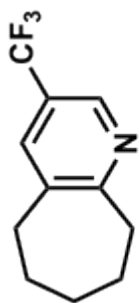

Compound 6-C3  
1H NMR, 400 MHz

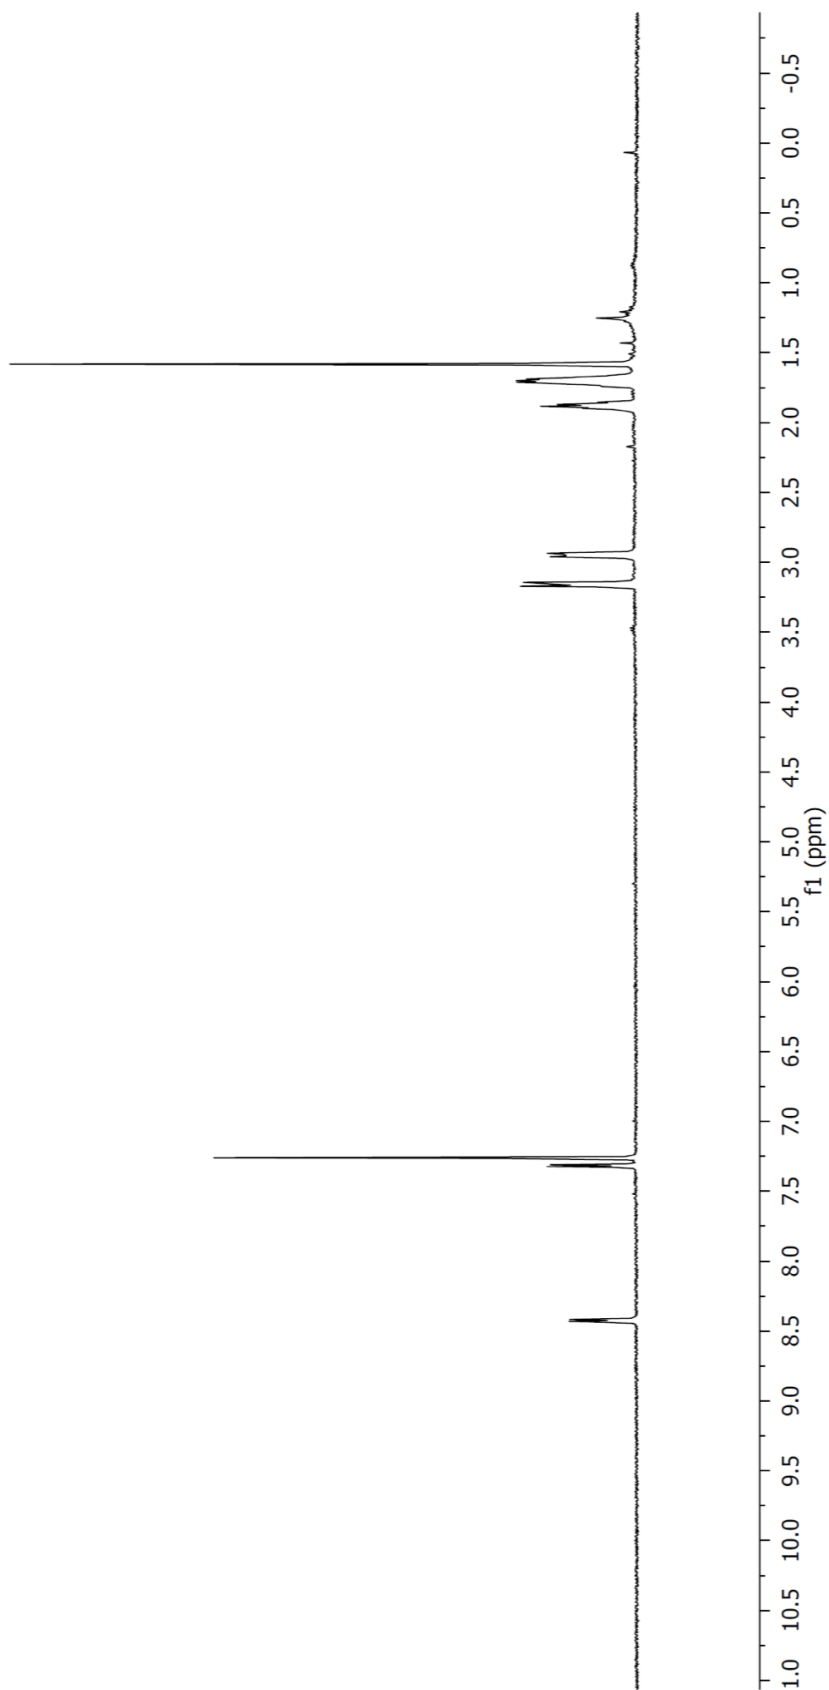

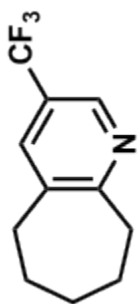

Compound 6-C3  
13C NMR, 150 MHz

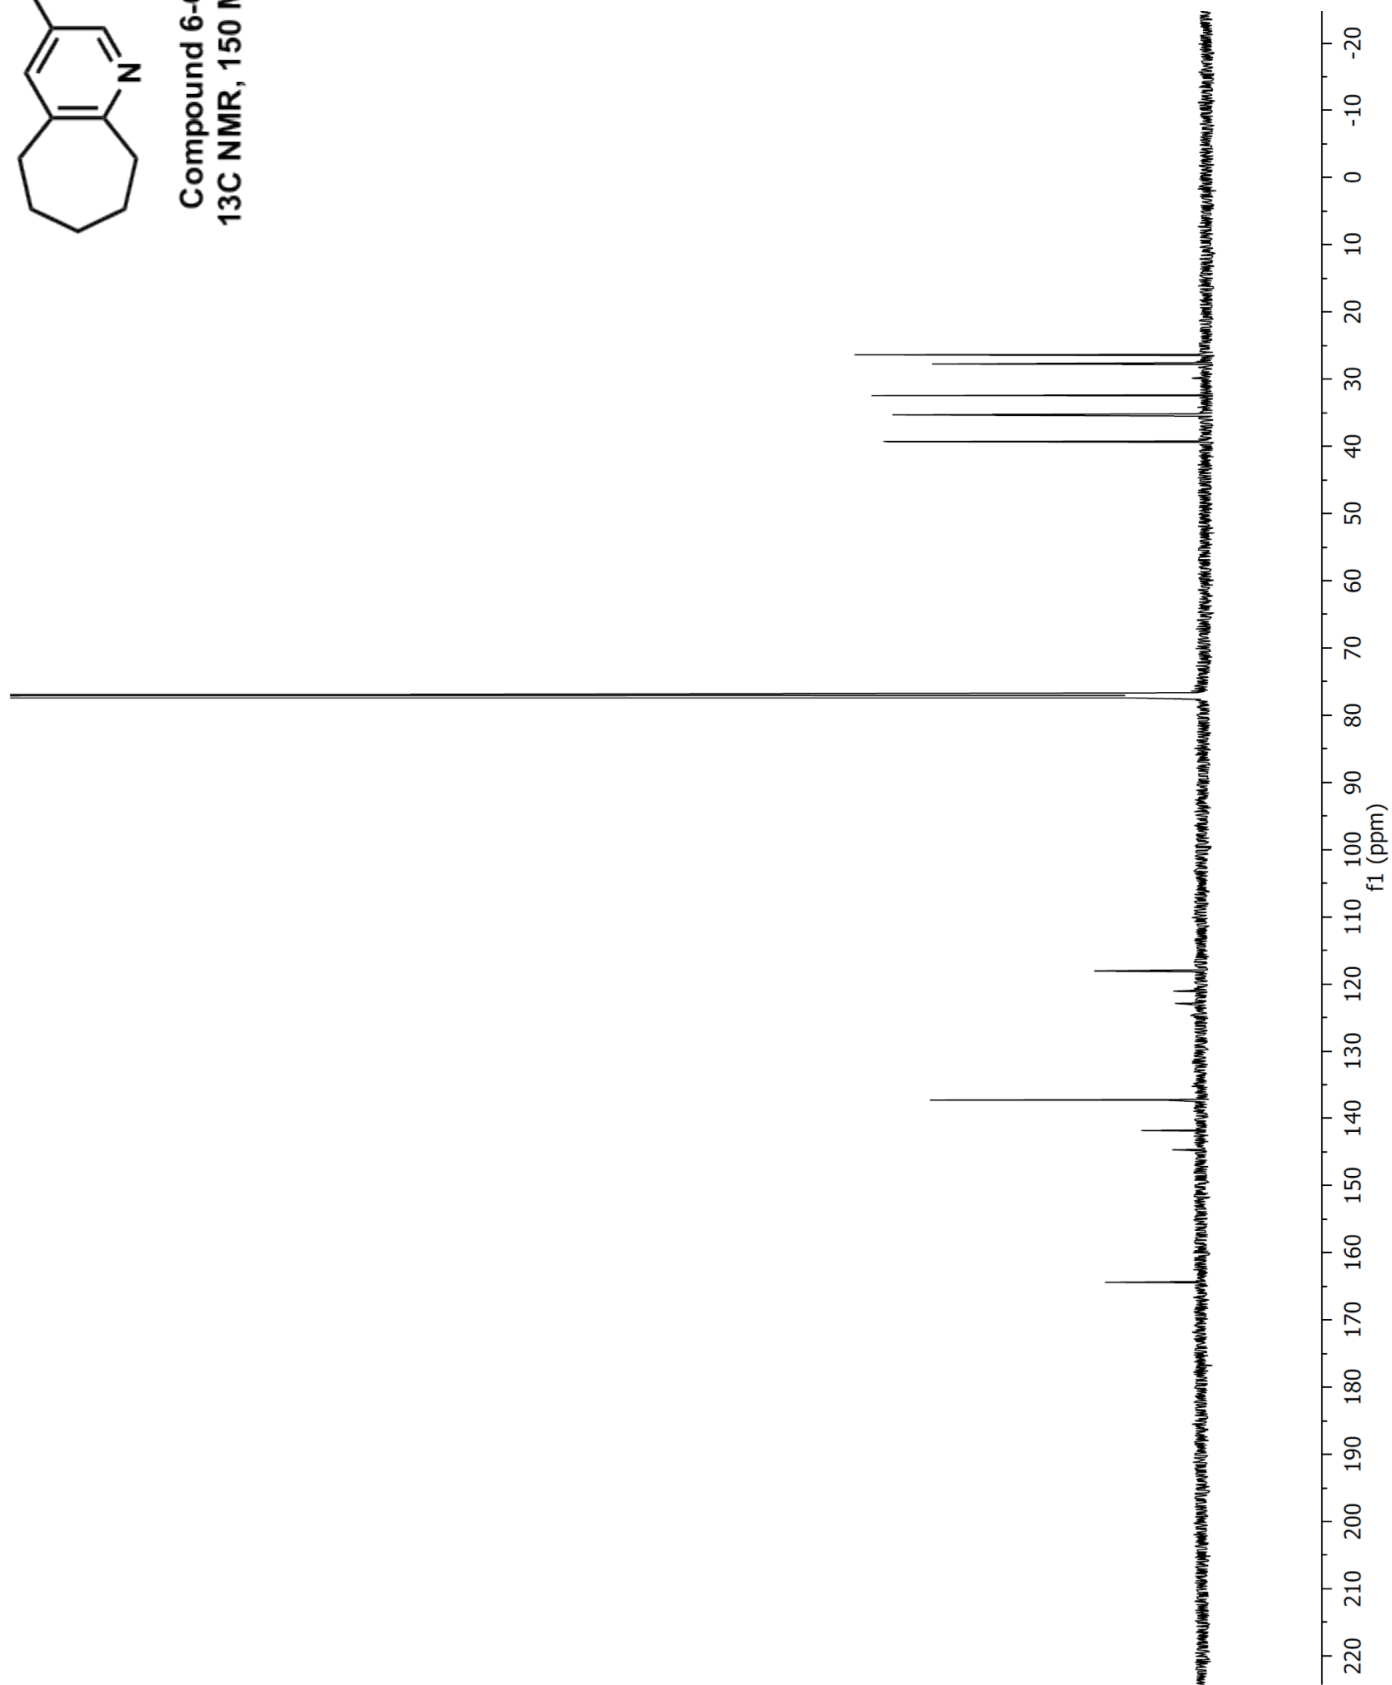

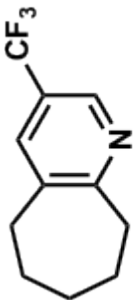

Compound 6-C3  
19F NMR, 376 MHz

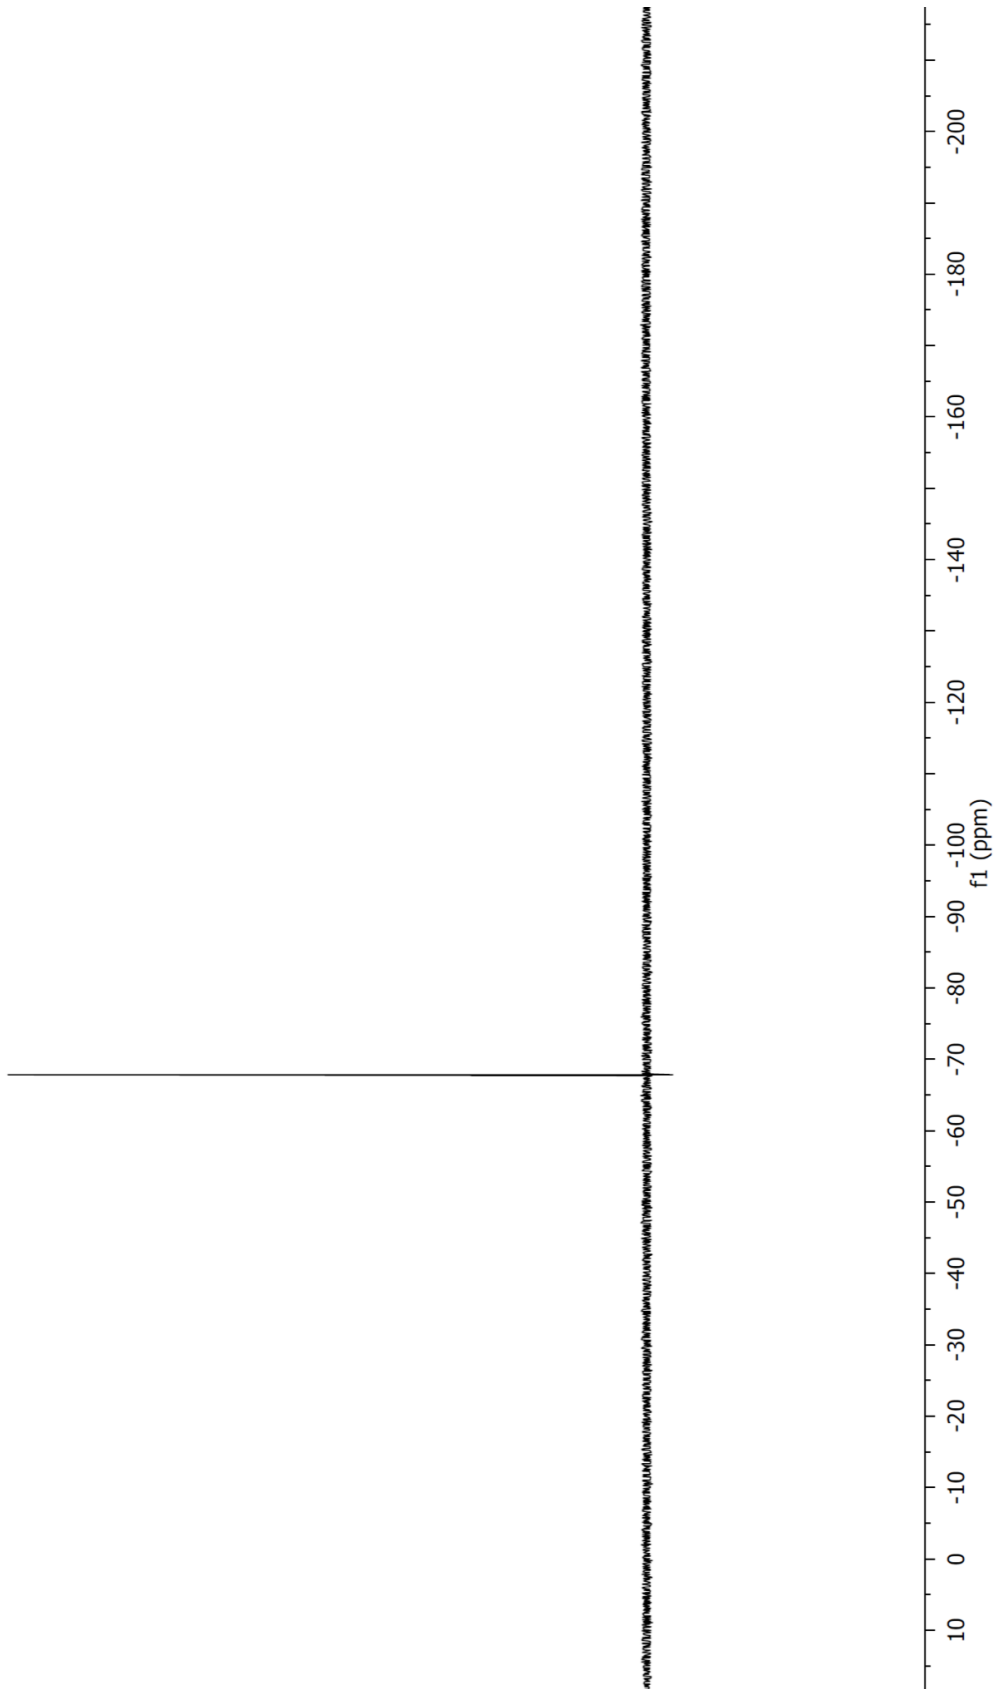

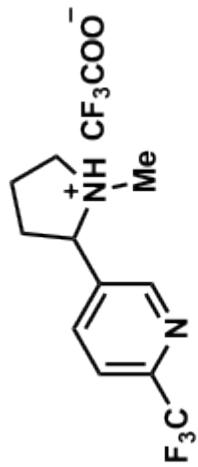

Compound 7·TFA  
1H NMR, 400 MHz

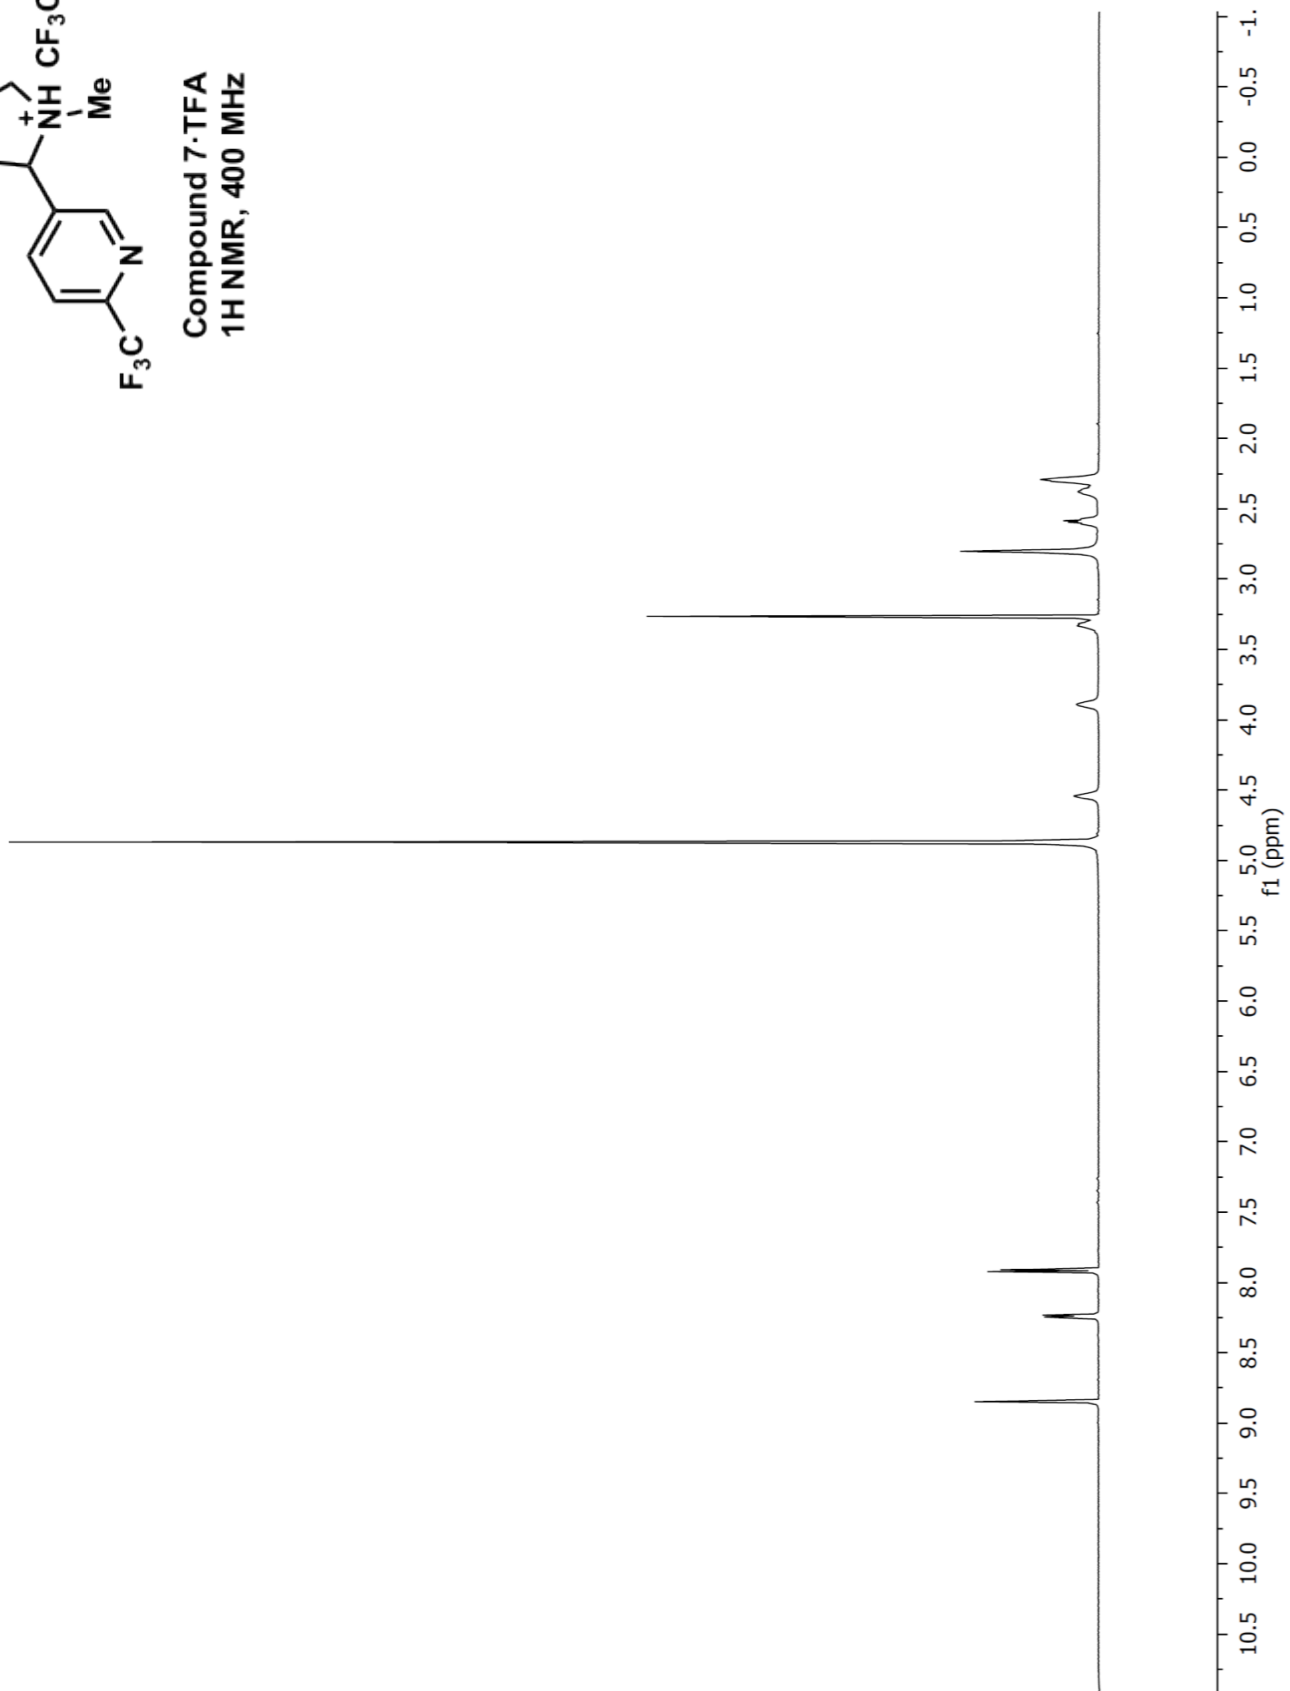

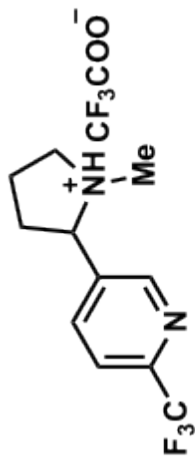

Compound 7·TFA  
13C NMR, 150 MHz

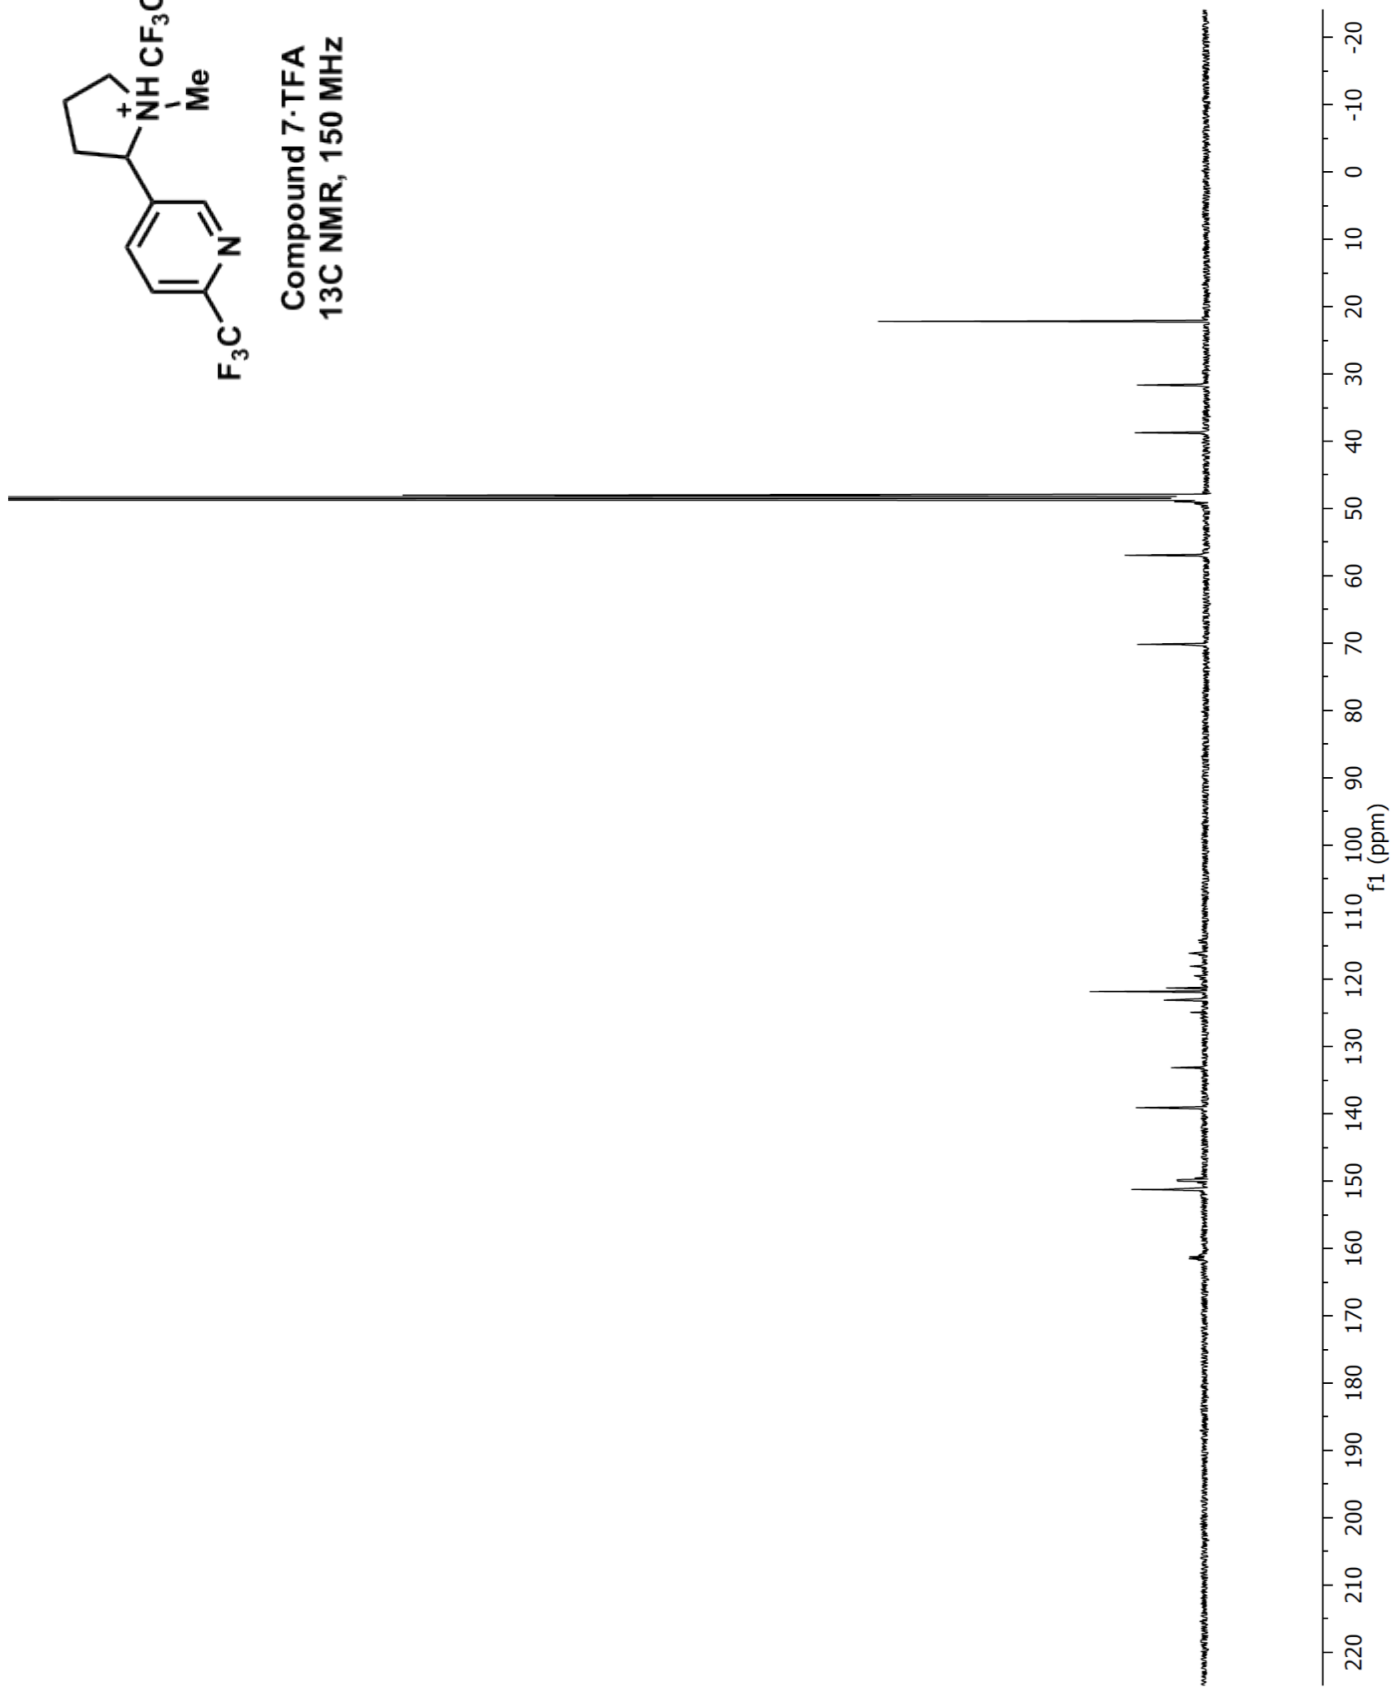

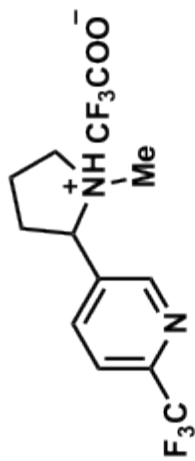

Compound 7·TFA  
19F NMR, 376 MHz

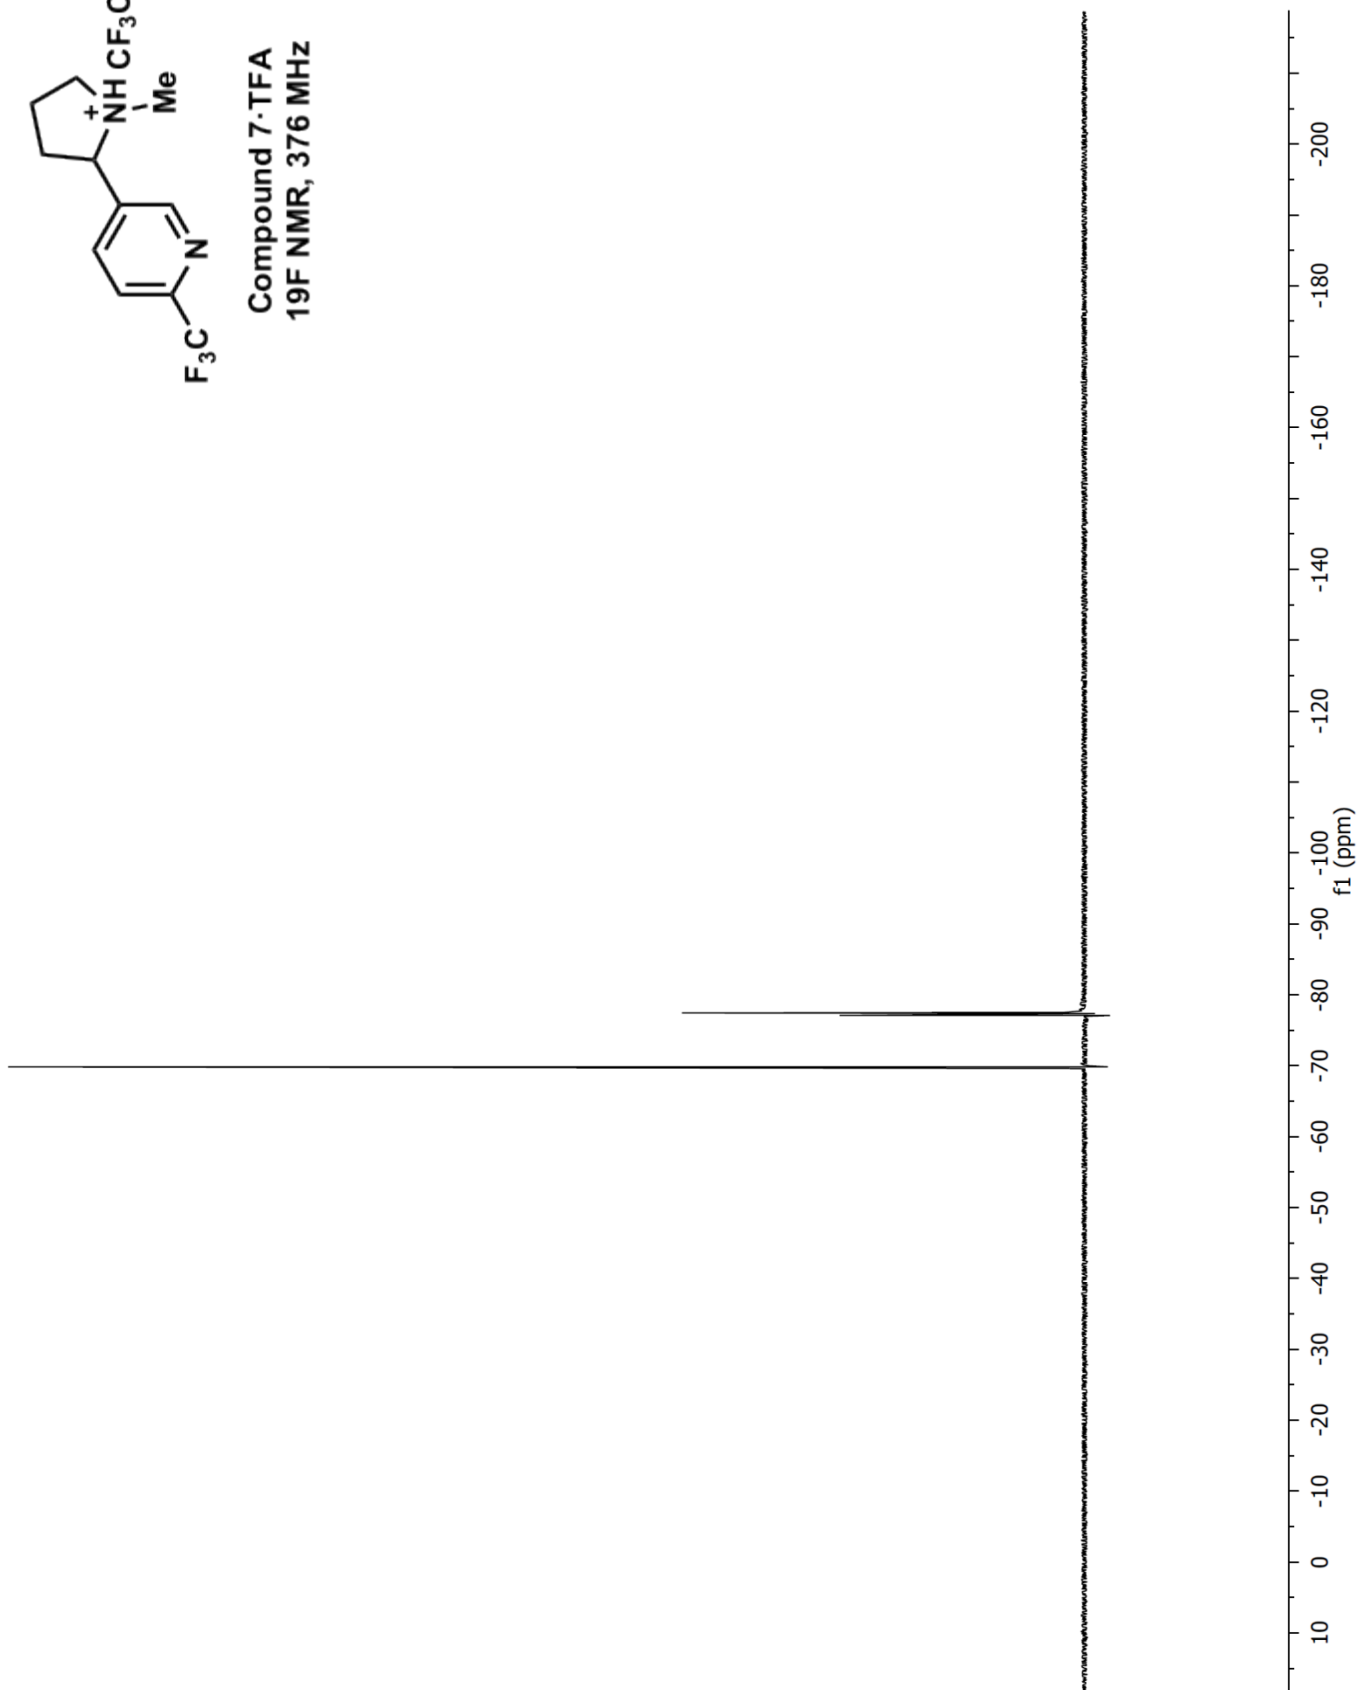

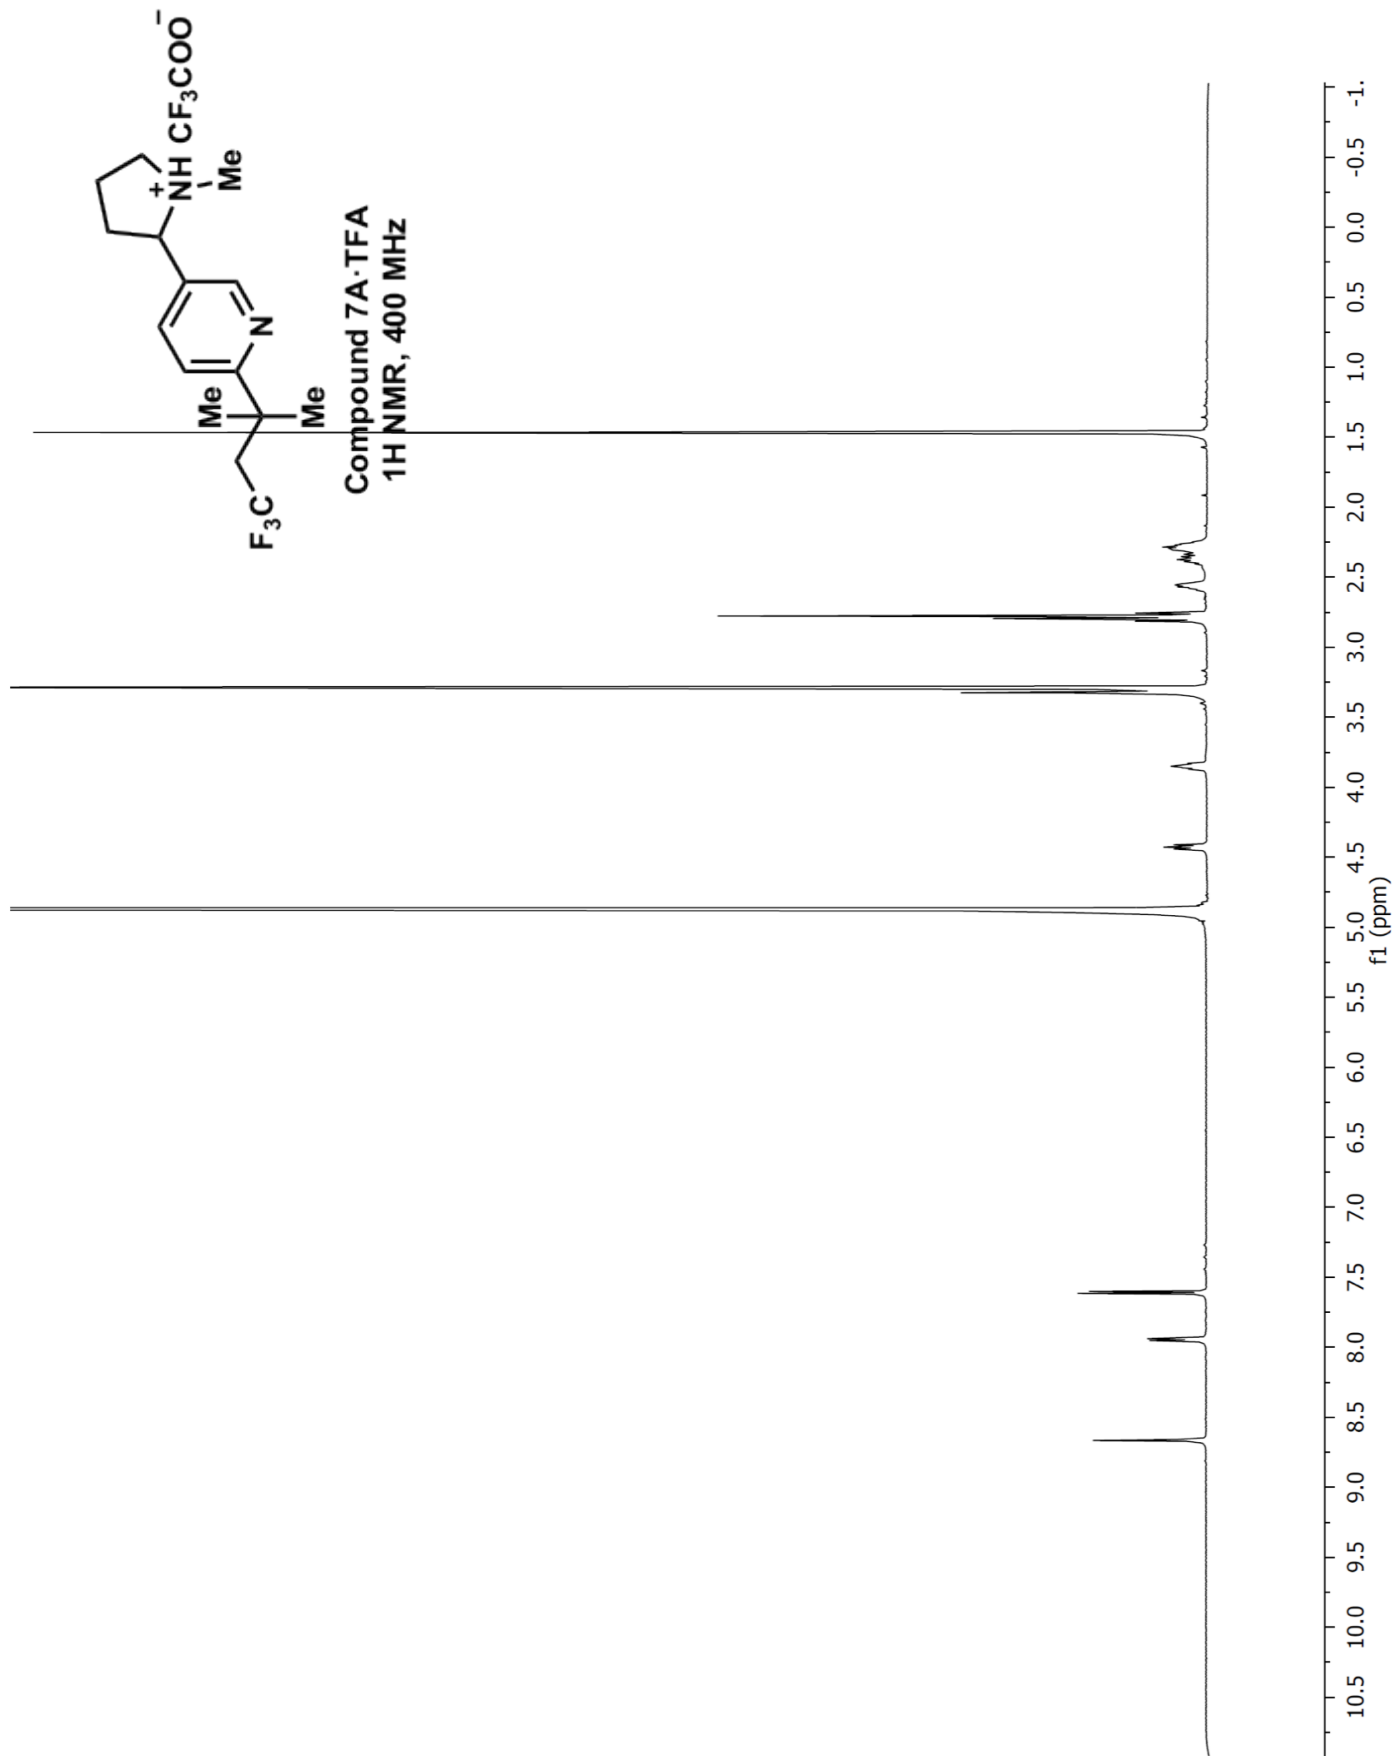



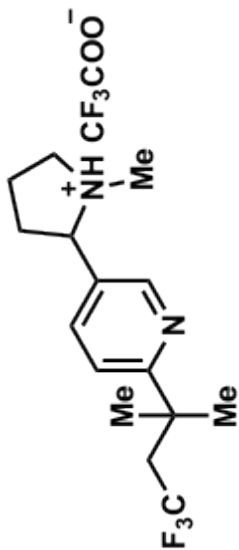

Compound 7A·TFA  
13C NMR, 150 MHz

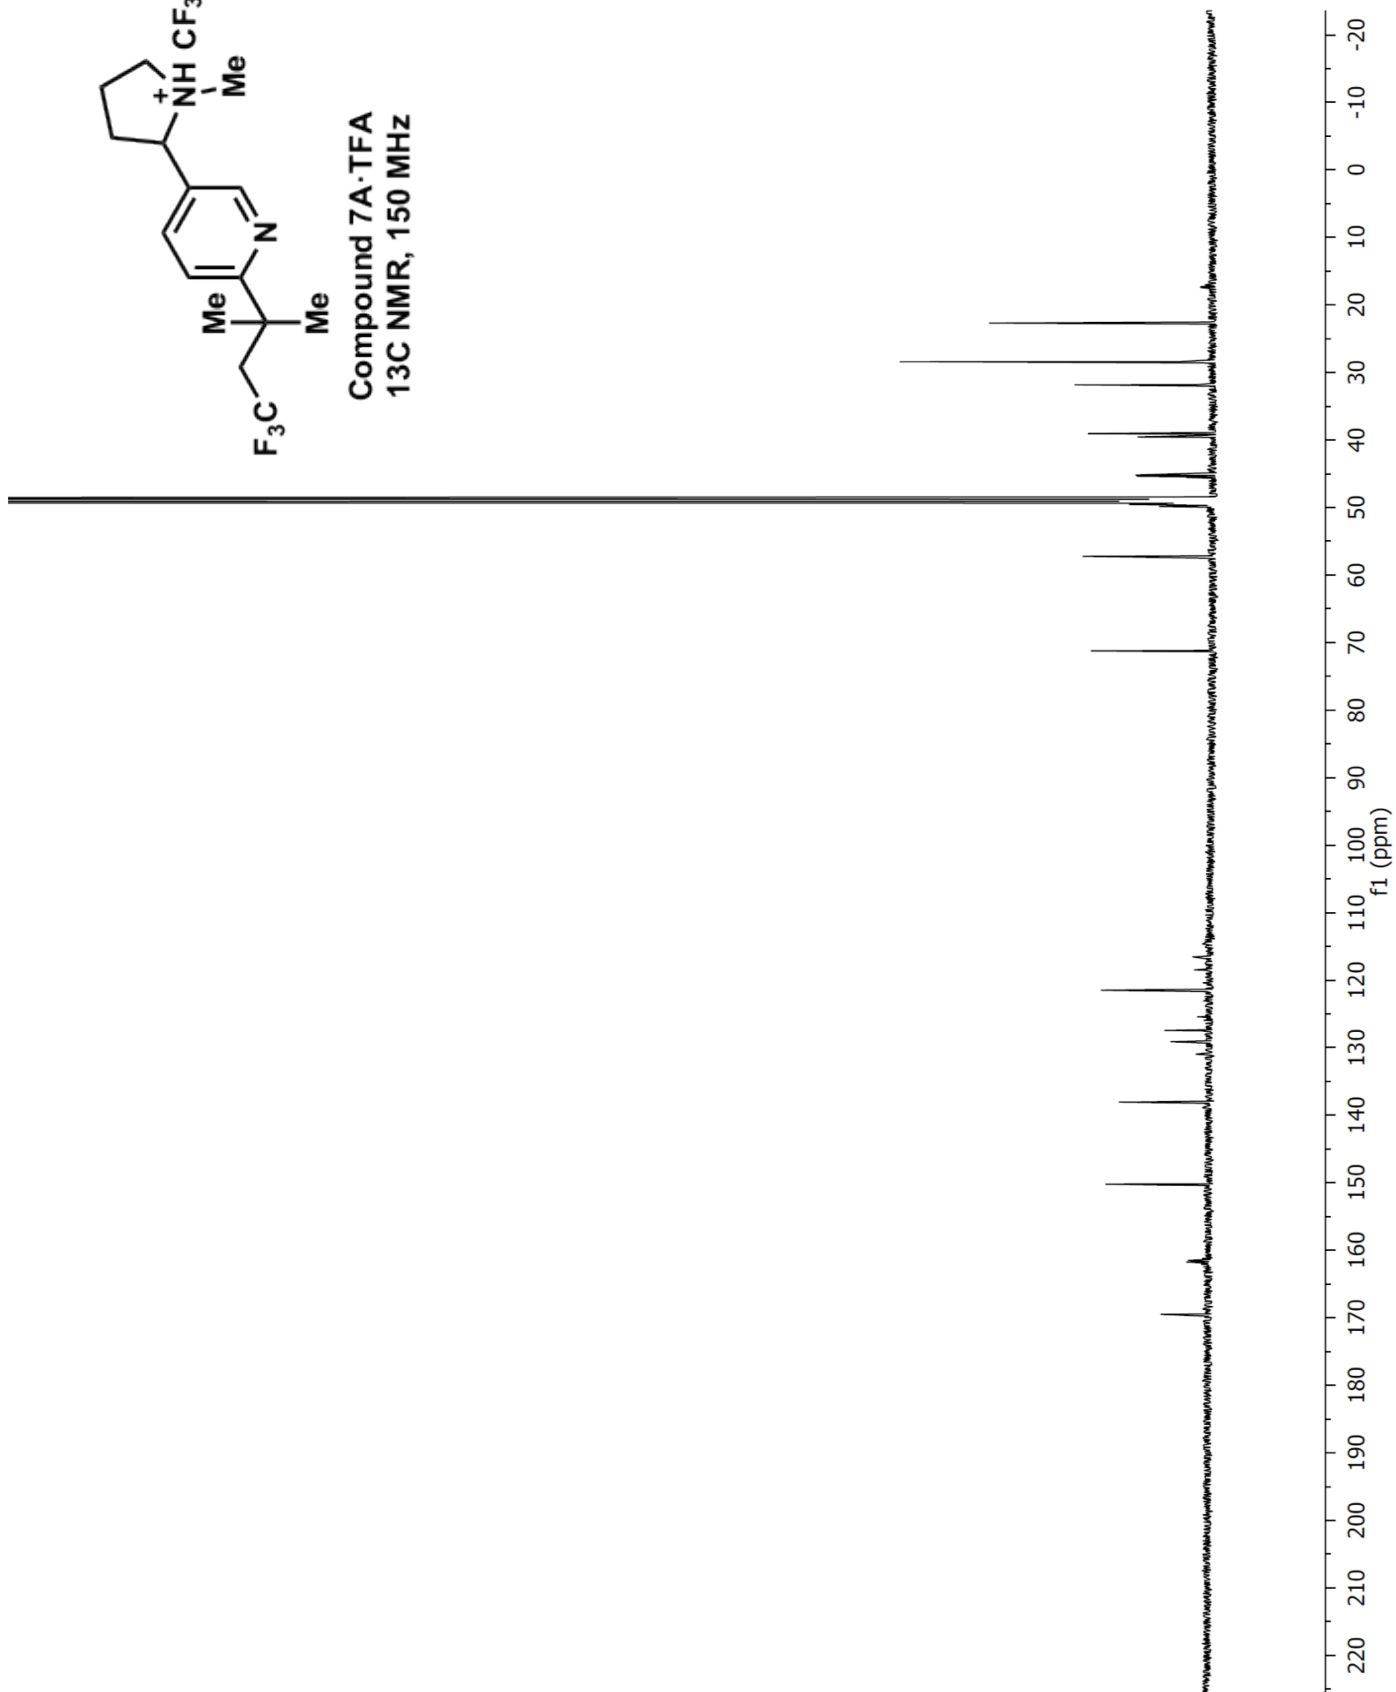

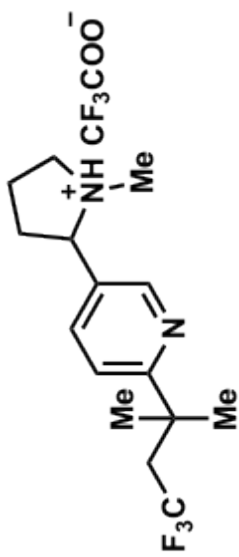

Compound 7A·TFA  
19F NMR, 376 MHz

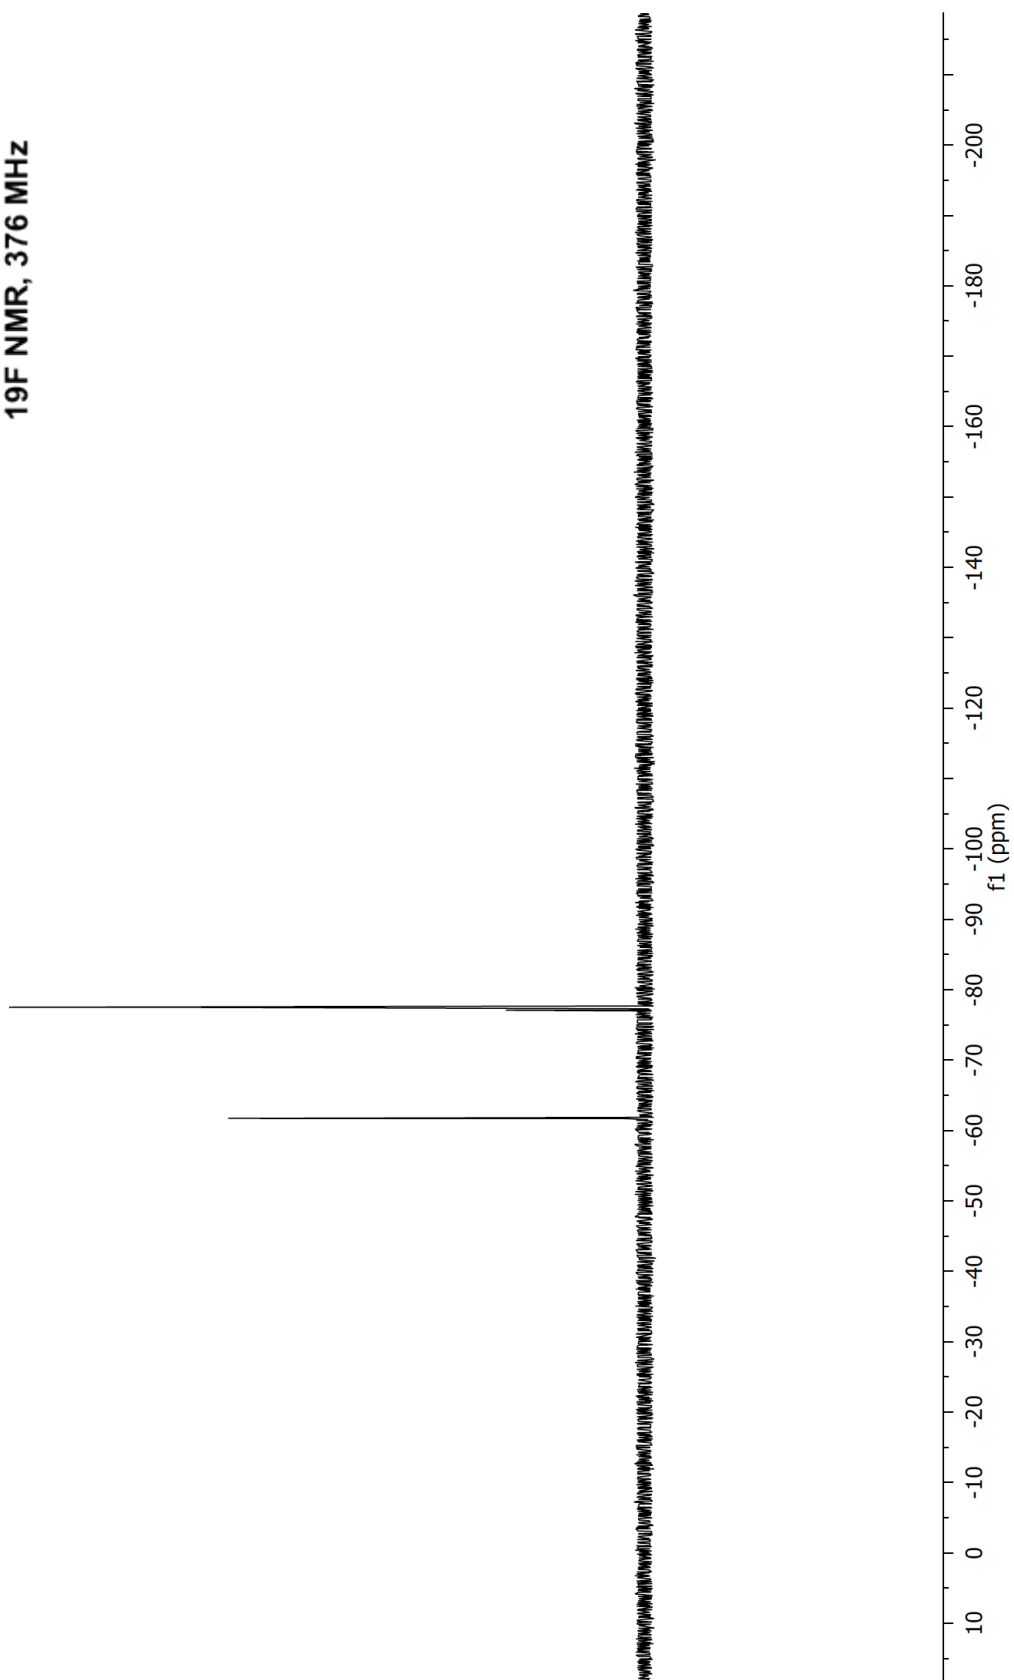

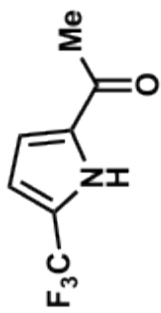

Compound 8  
1H NMR, 400 MHz

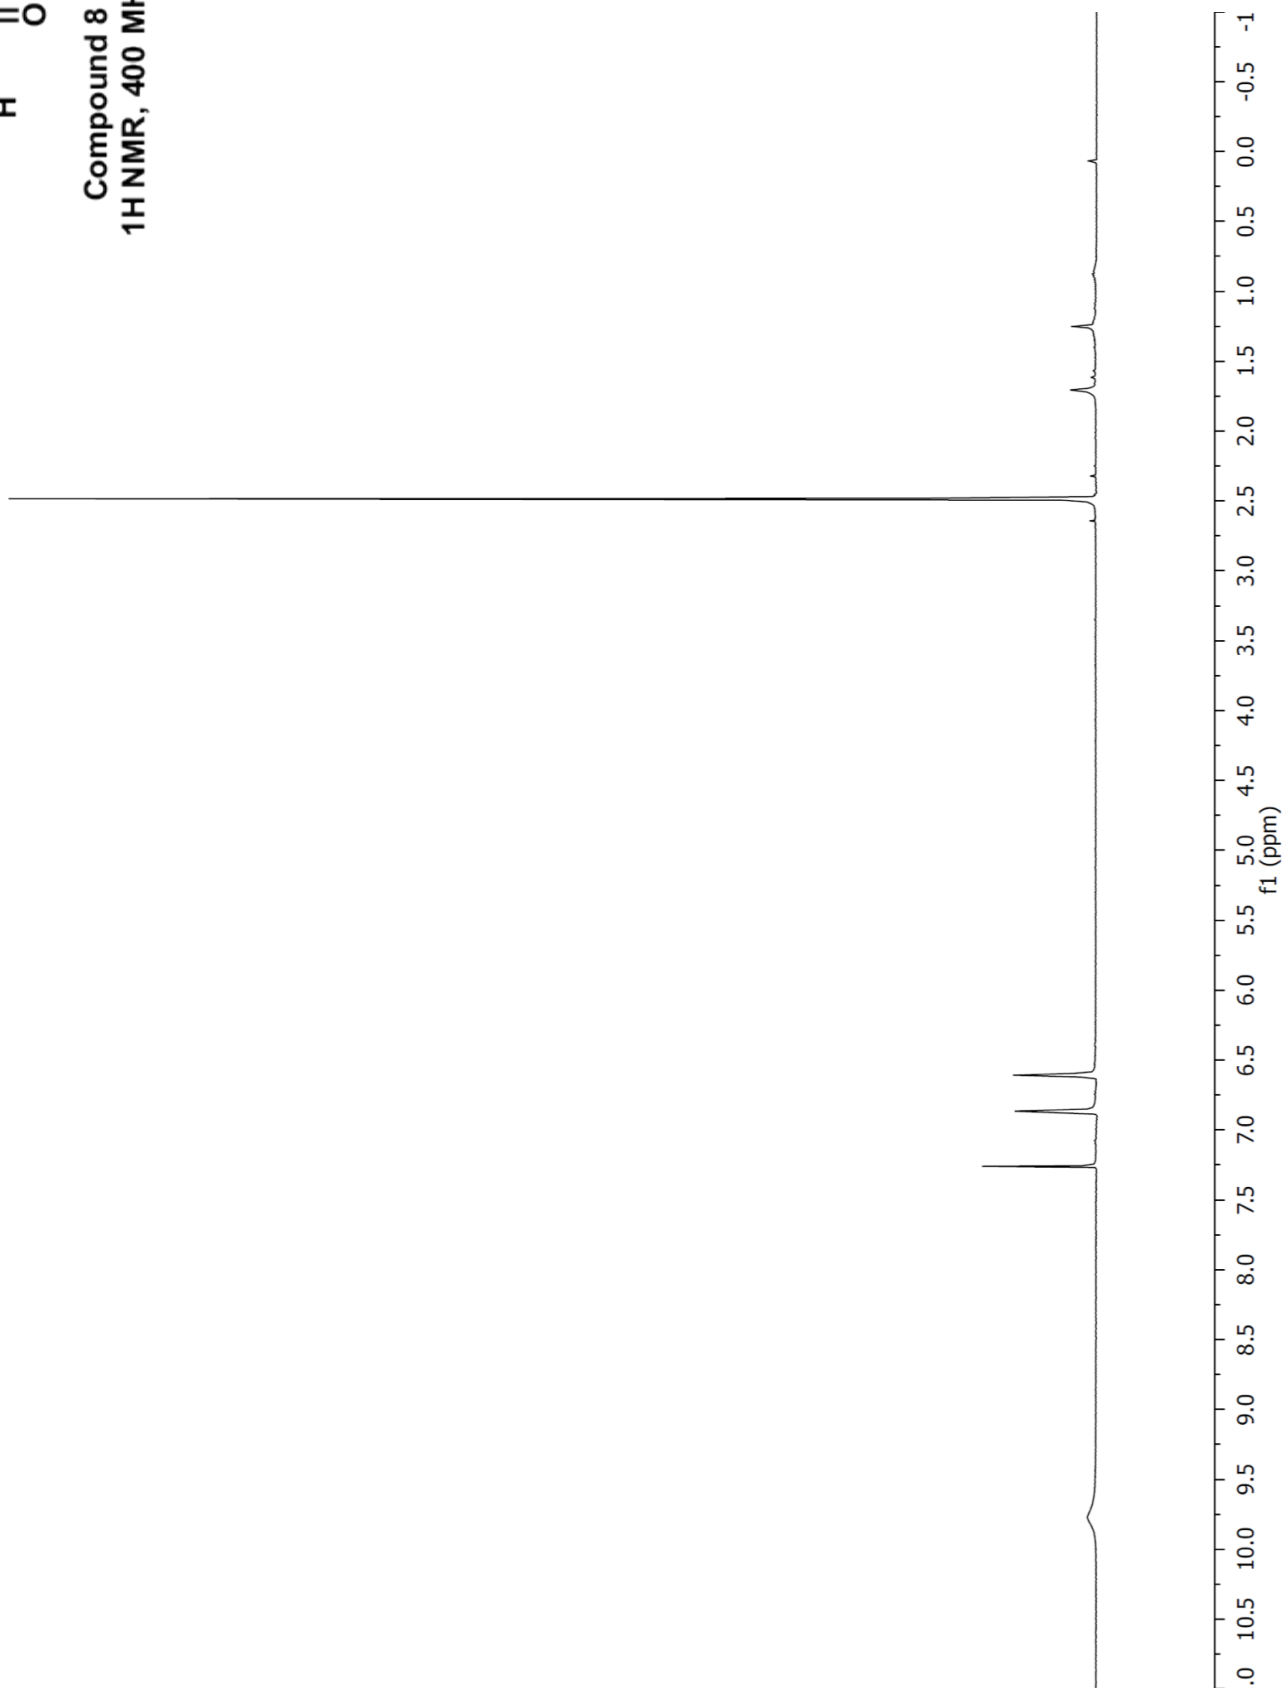

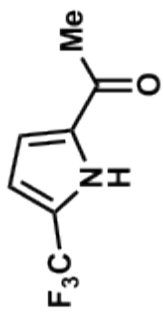

Compound 8  
 $^{13}C$  NMR, 150 MHz

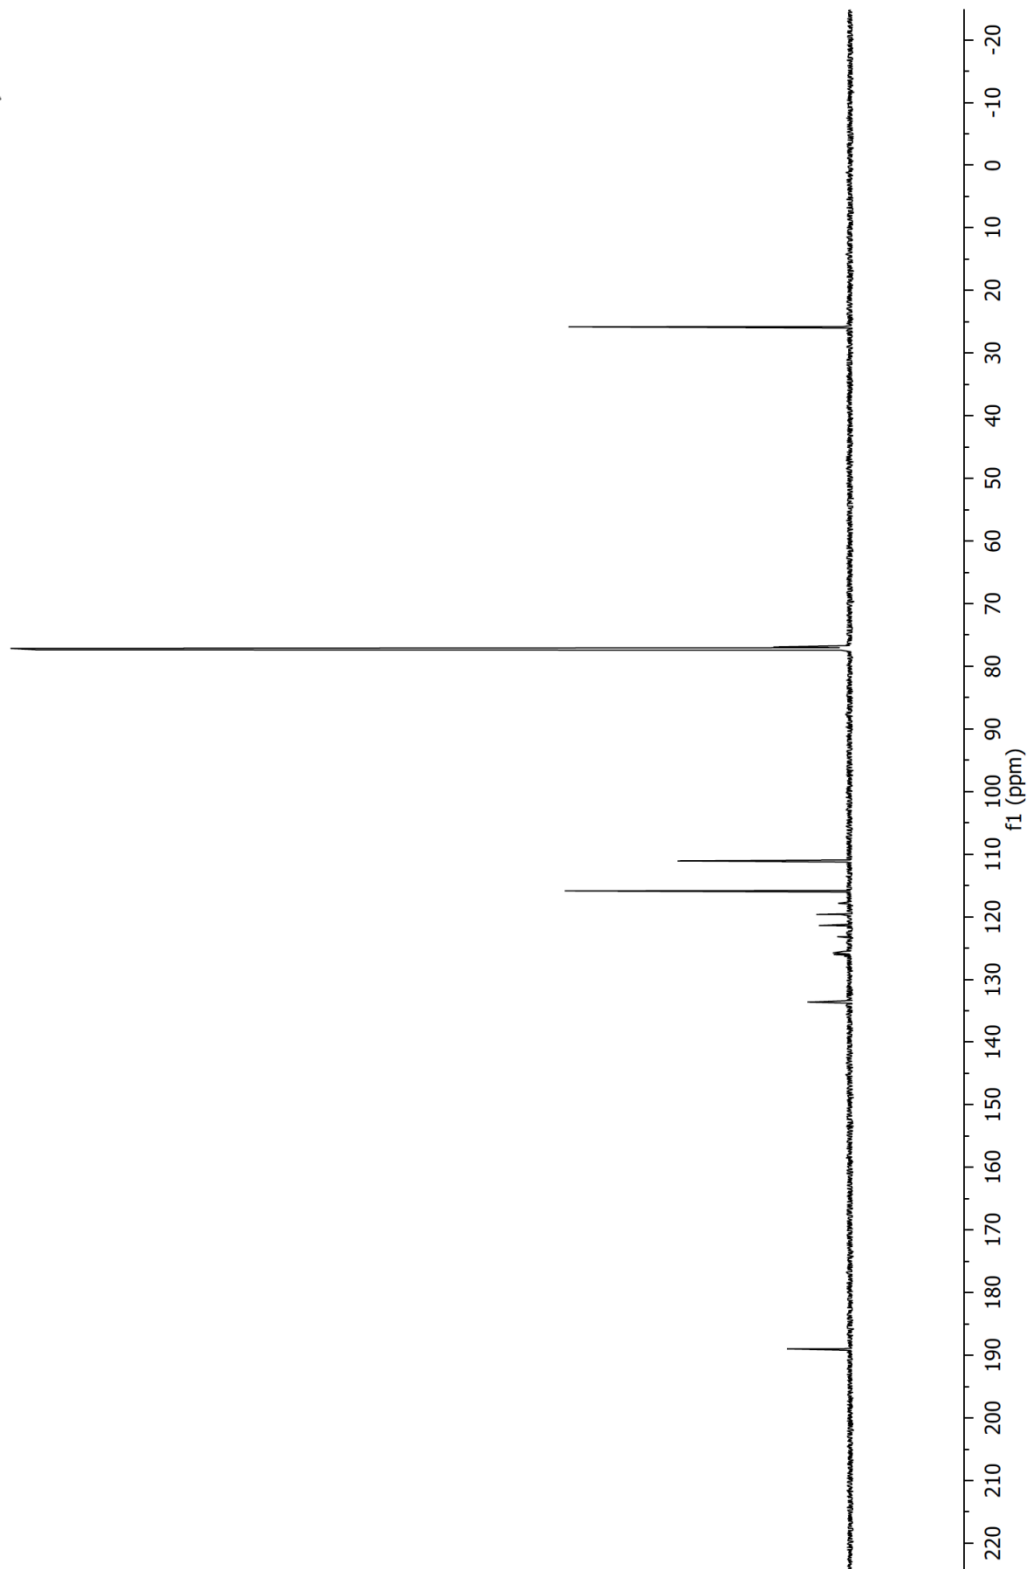

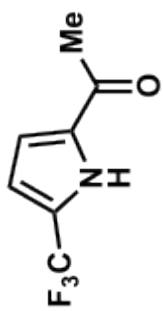

Compound 8  
19F NMR, 376 MHz

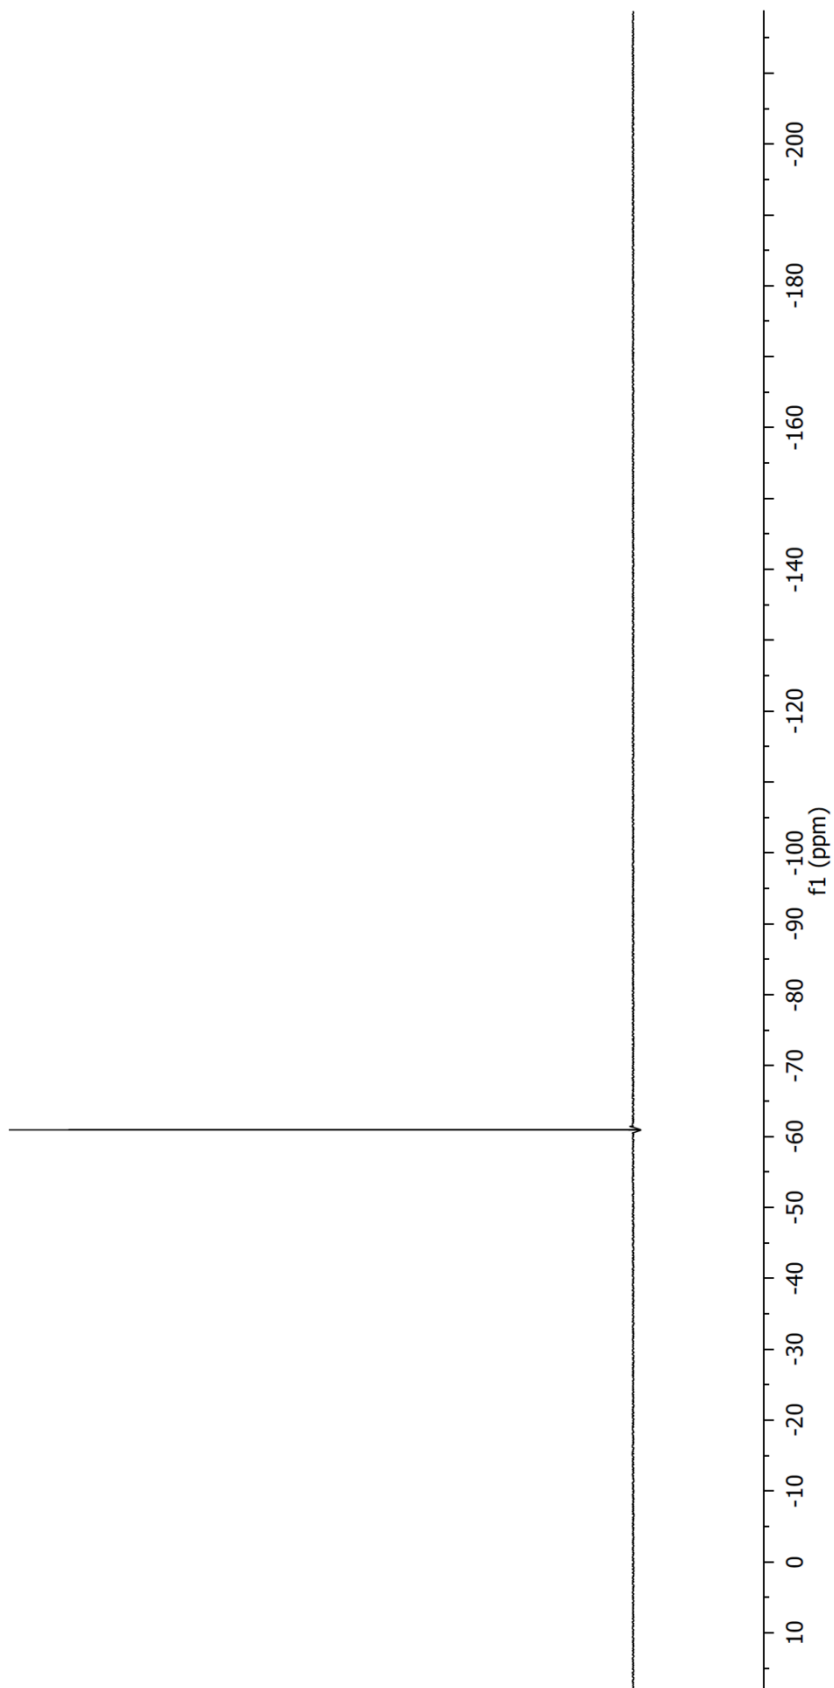

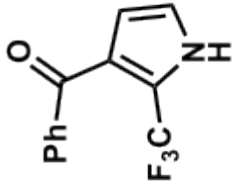

Compound 9  
1H NMR, 400 MHz

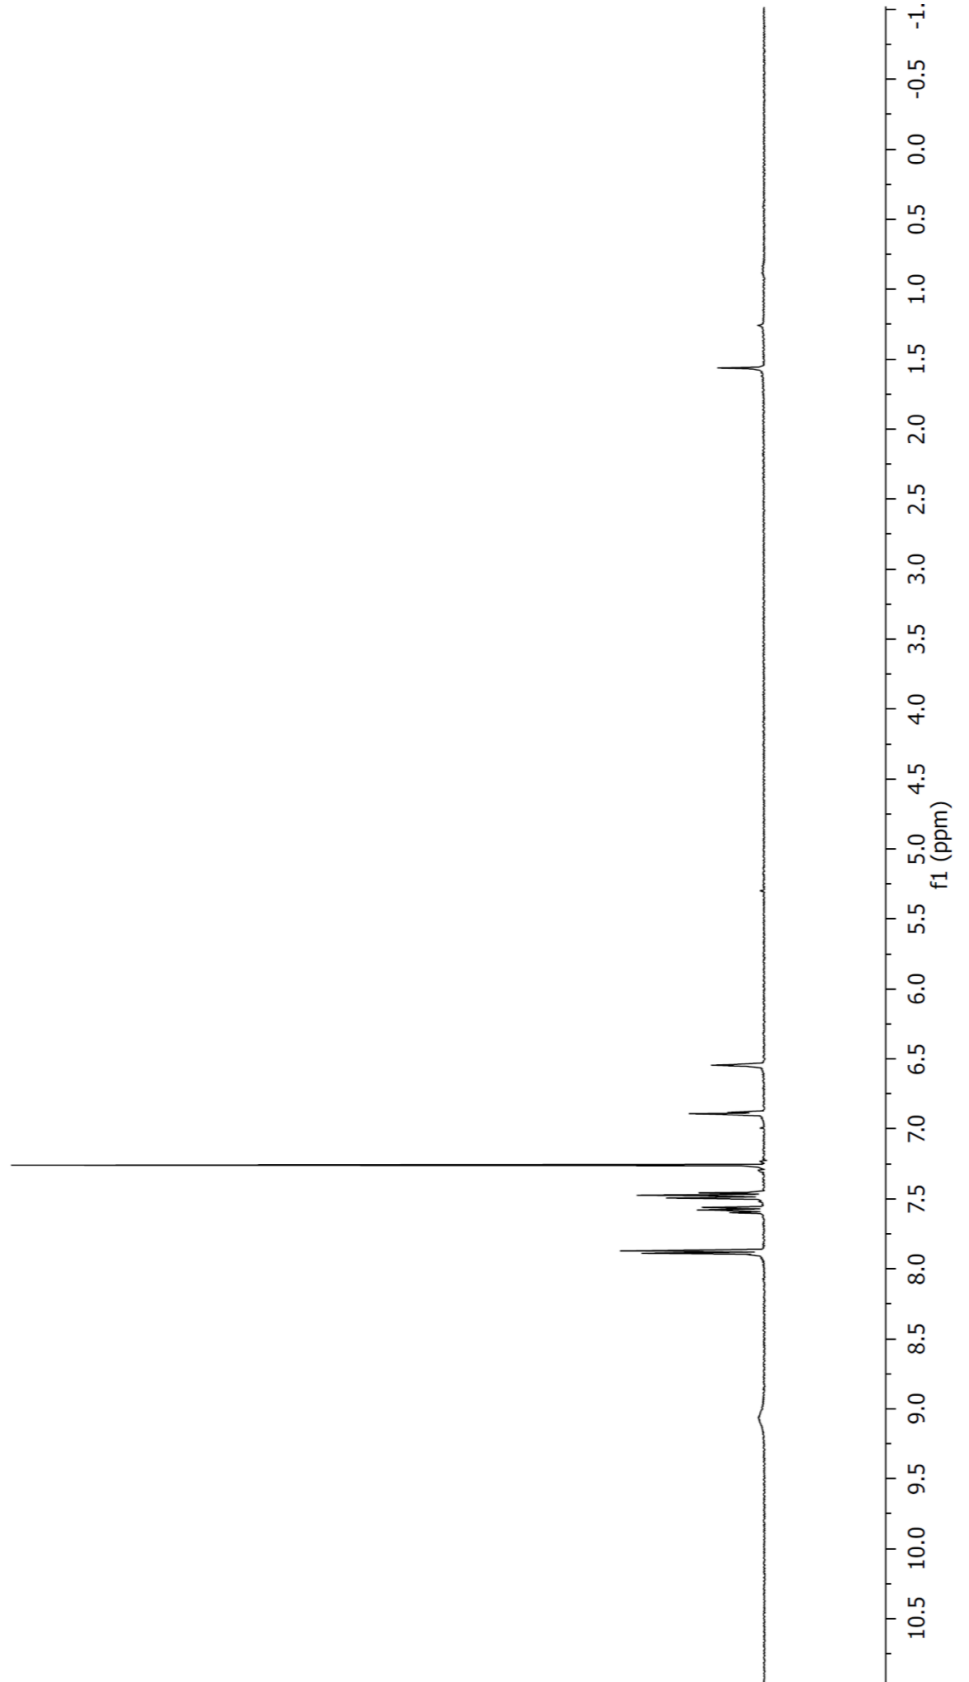

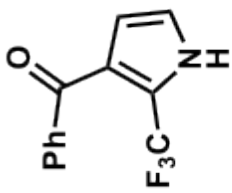

Compound 9  
13C NMR, 150 MHz

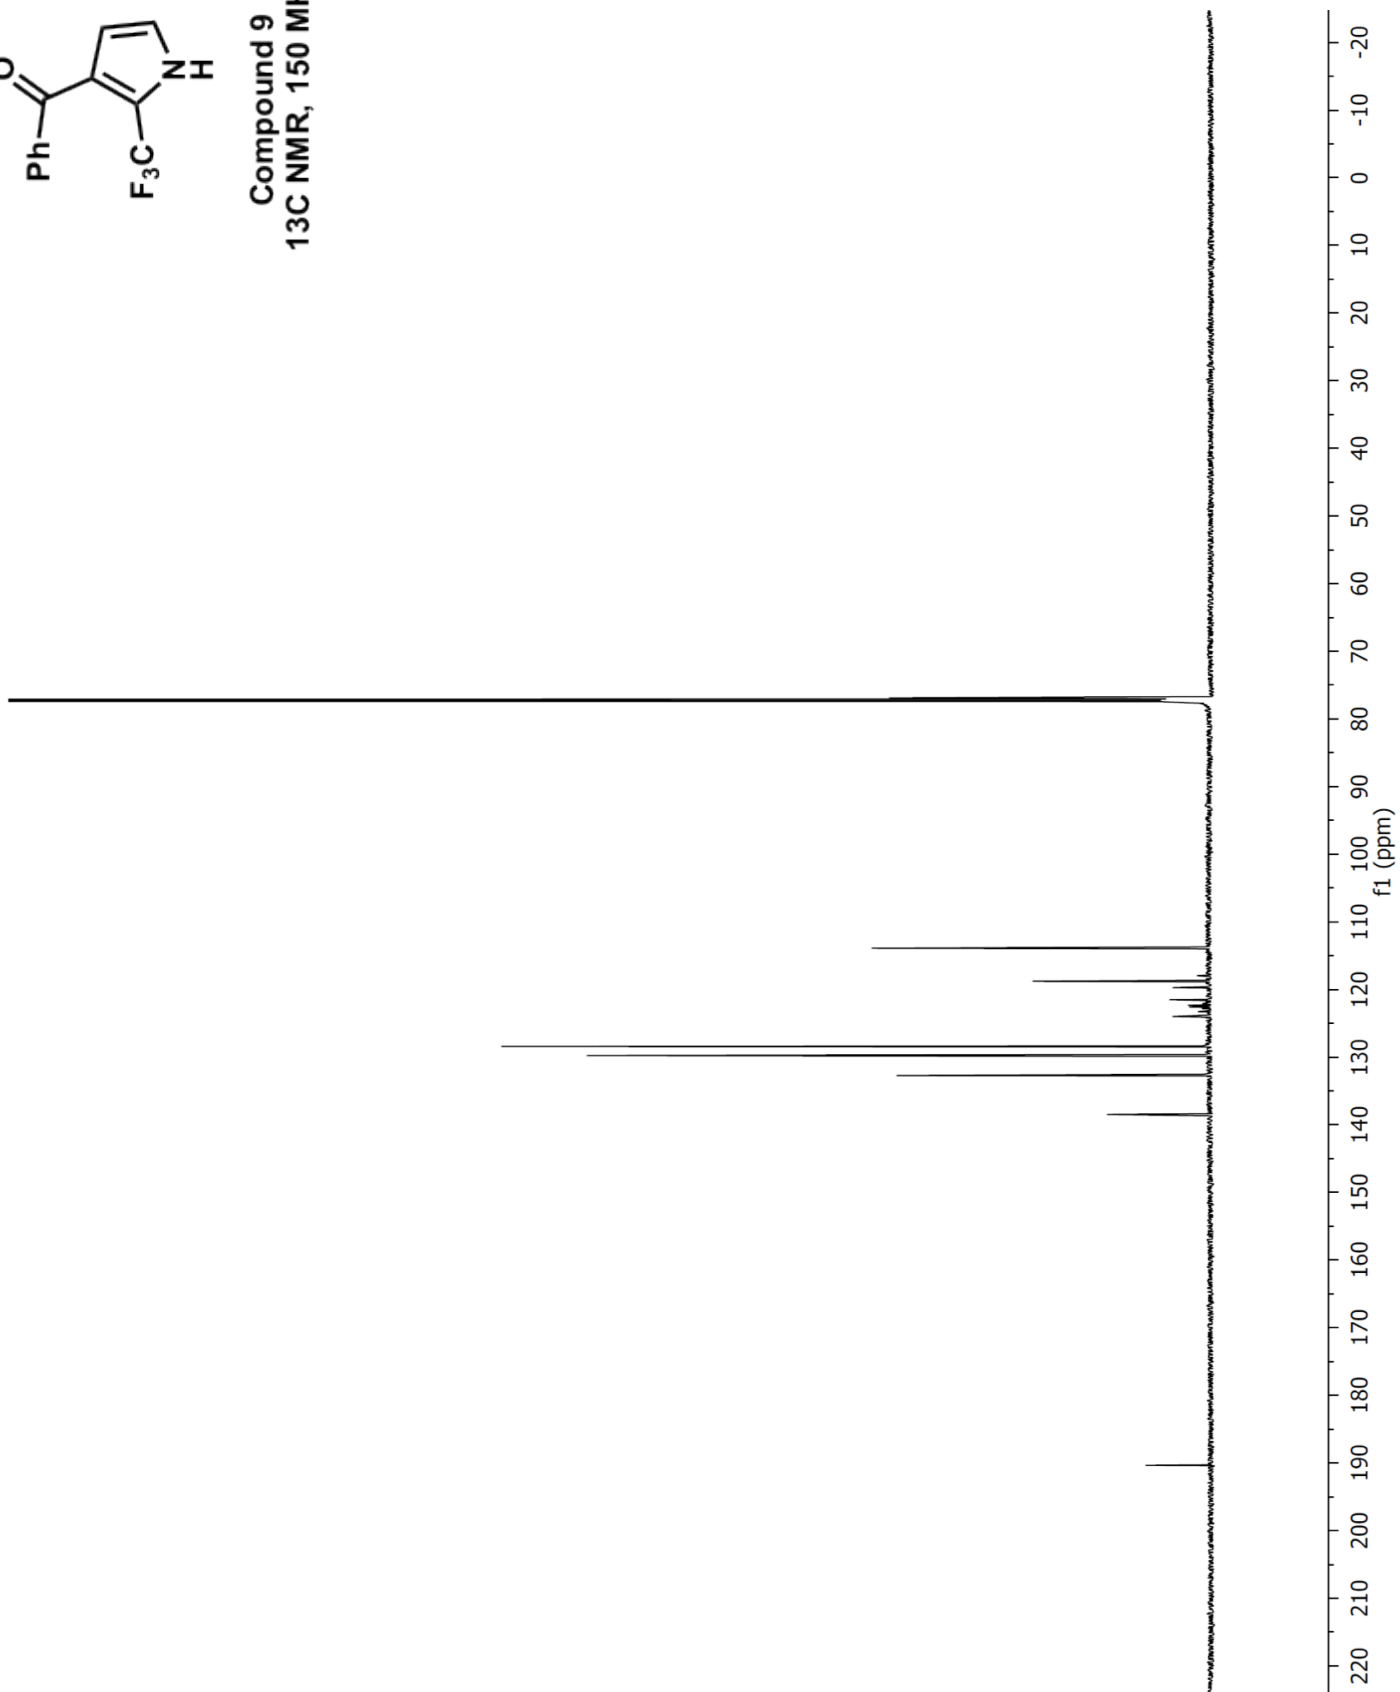

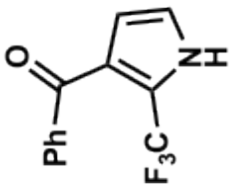

Compound 9  
19F NMR, 376 MHz

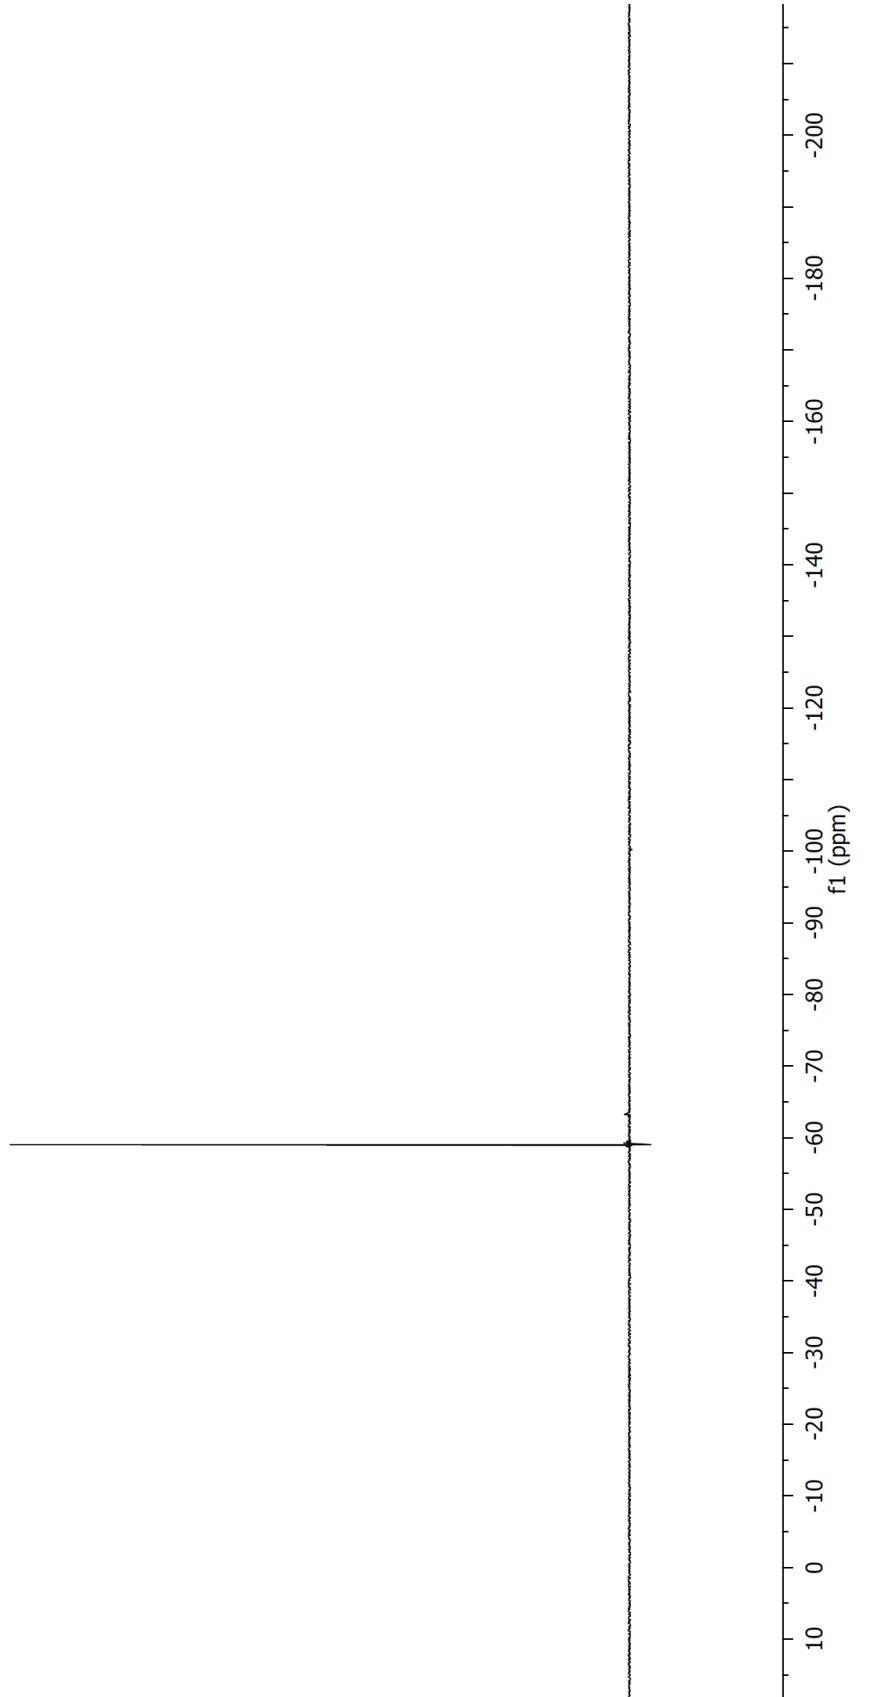



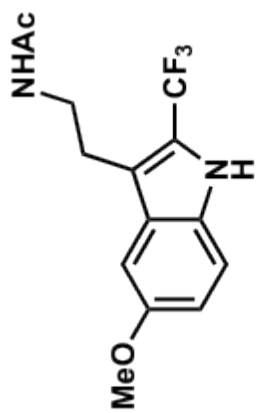

Compound 10  
1H NMR, 600 MHz

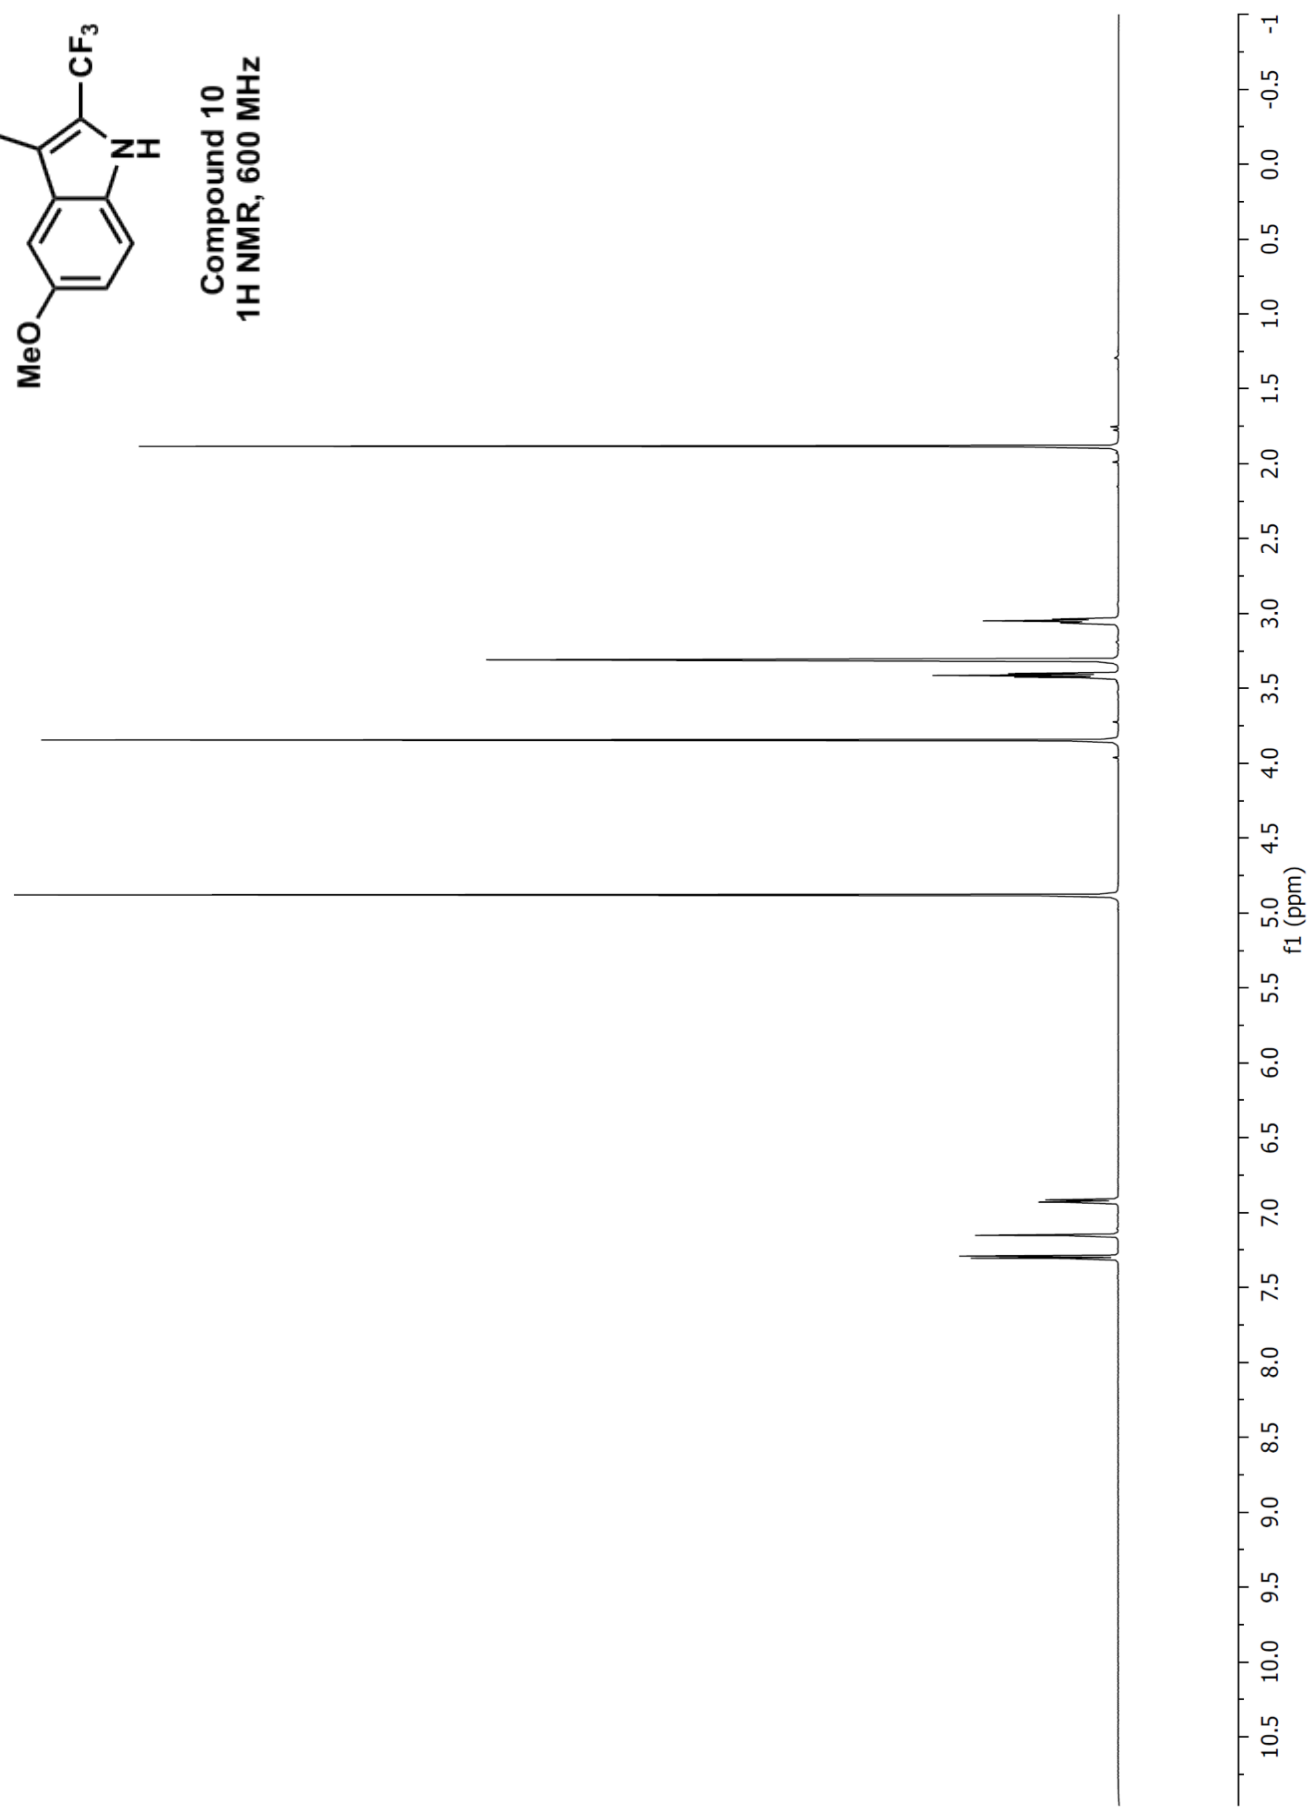

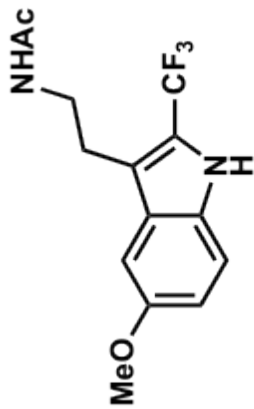

Compound 10  
13C NMR, 150 MHz

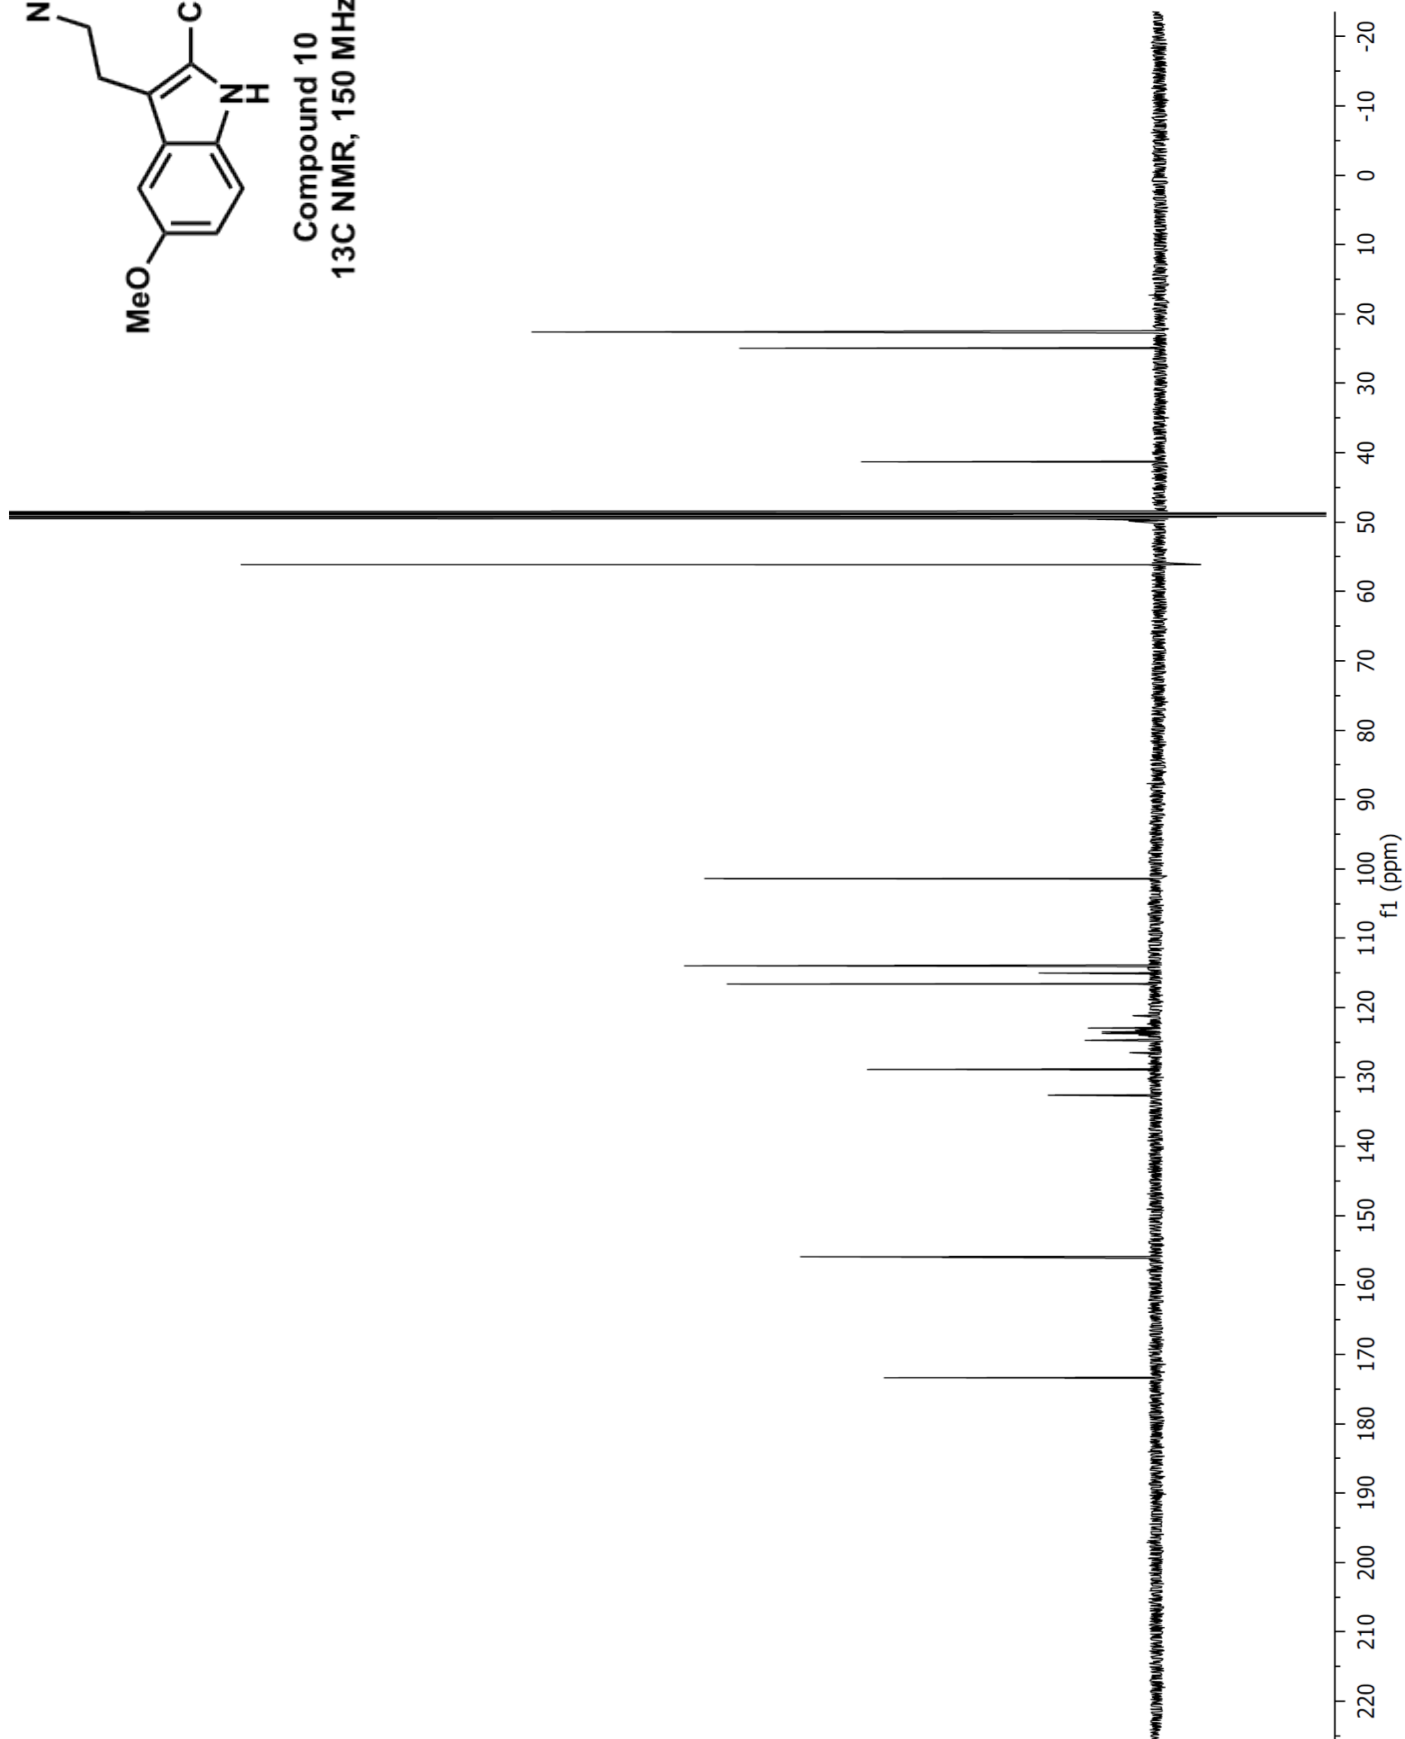

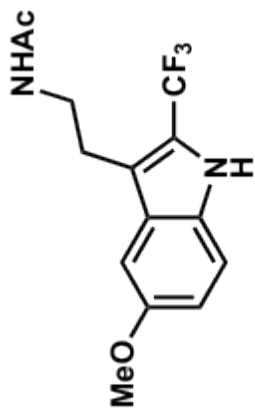

Compound 10  
19F NMR, 376 MHz

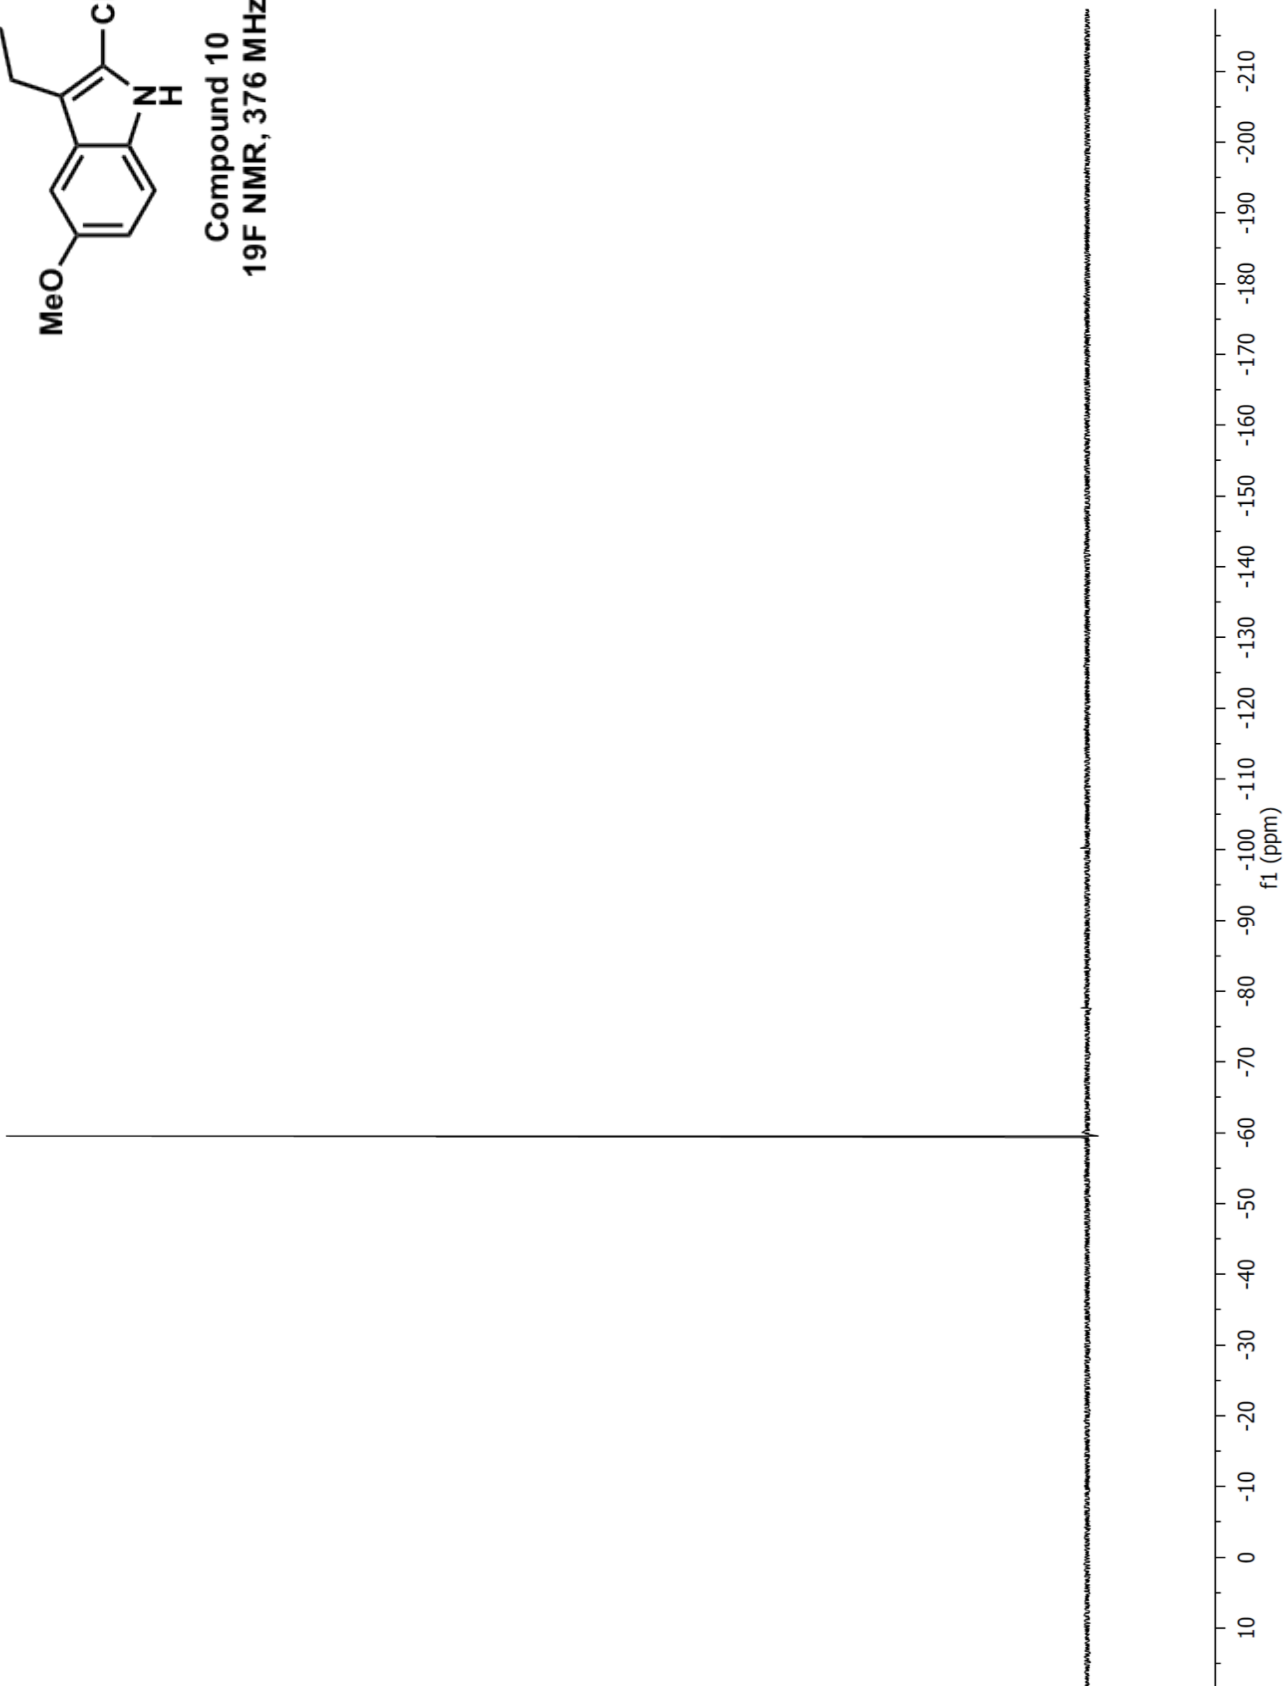

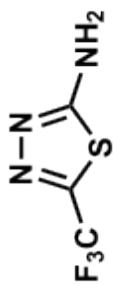

Compound 11  
13C NMR, 150 MHz

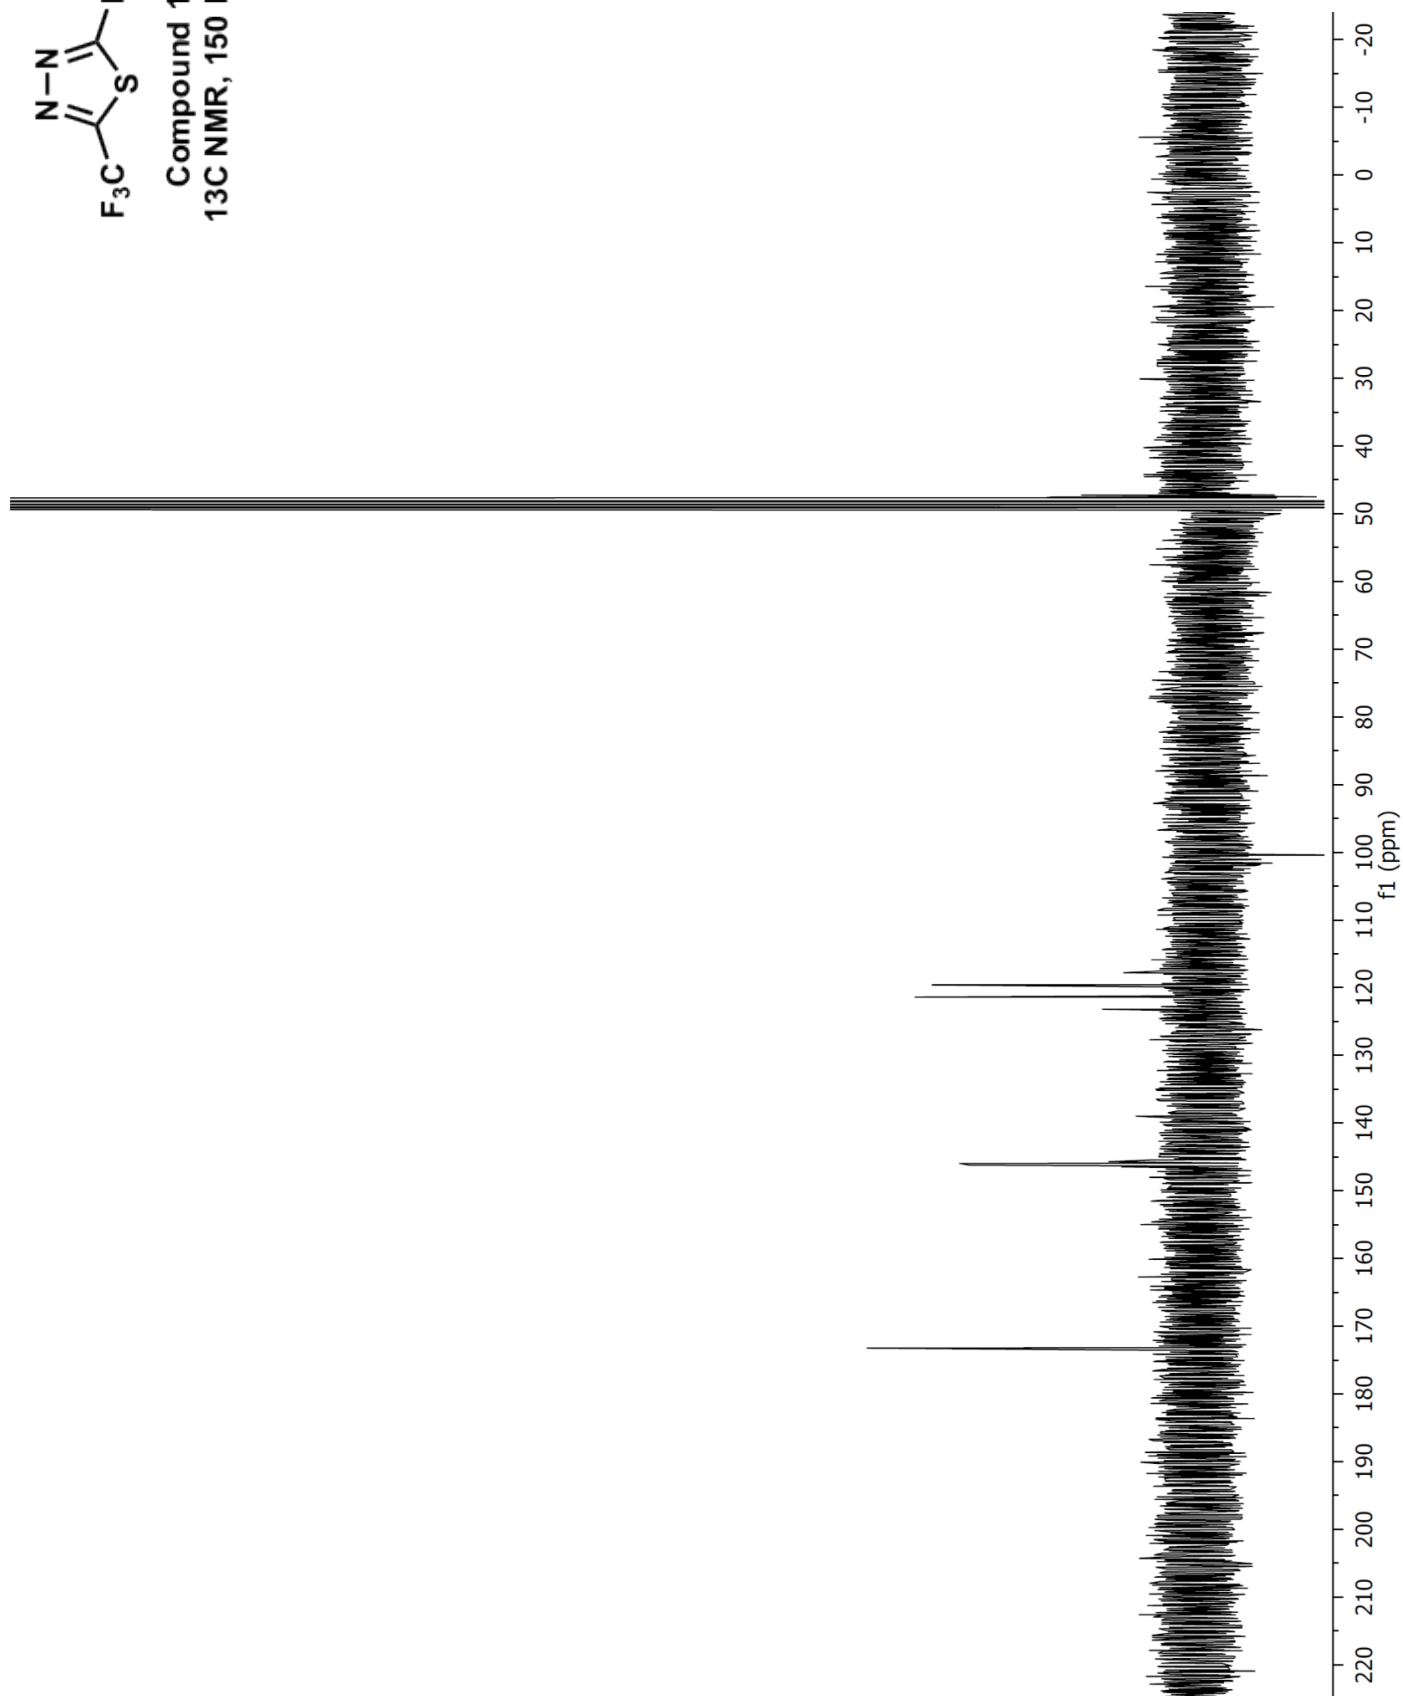

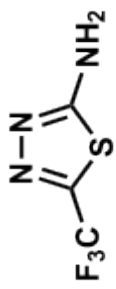

Compound 11  
19F NMR, 376 MHz

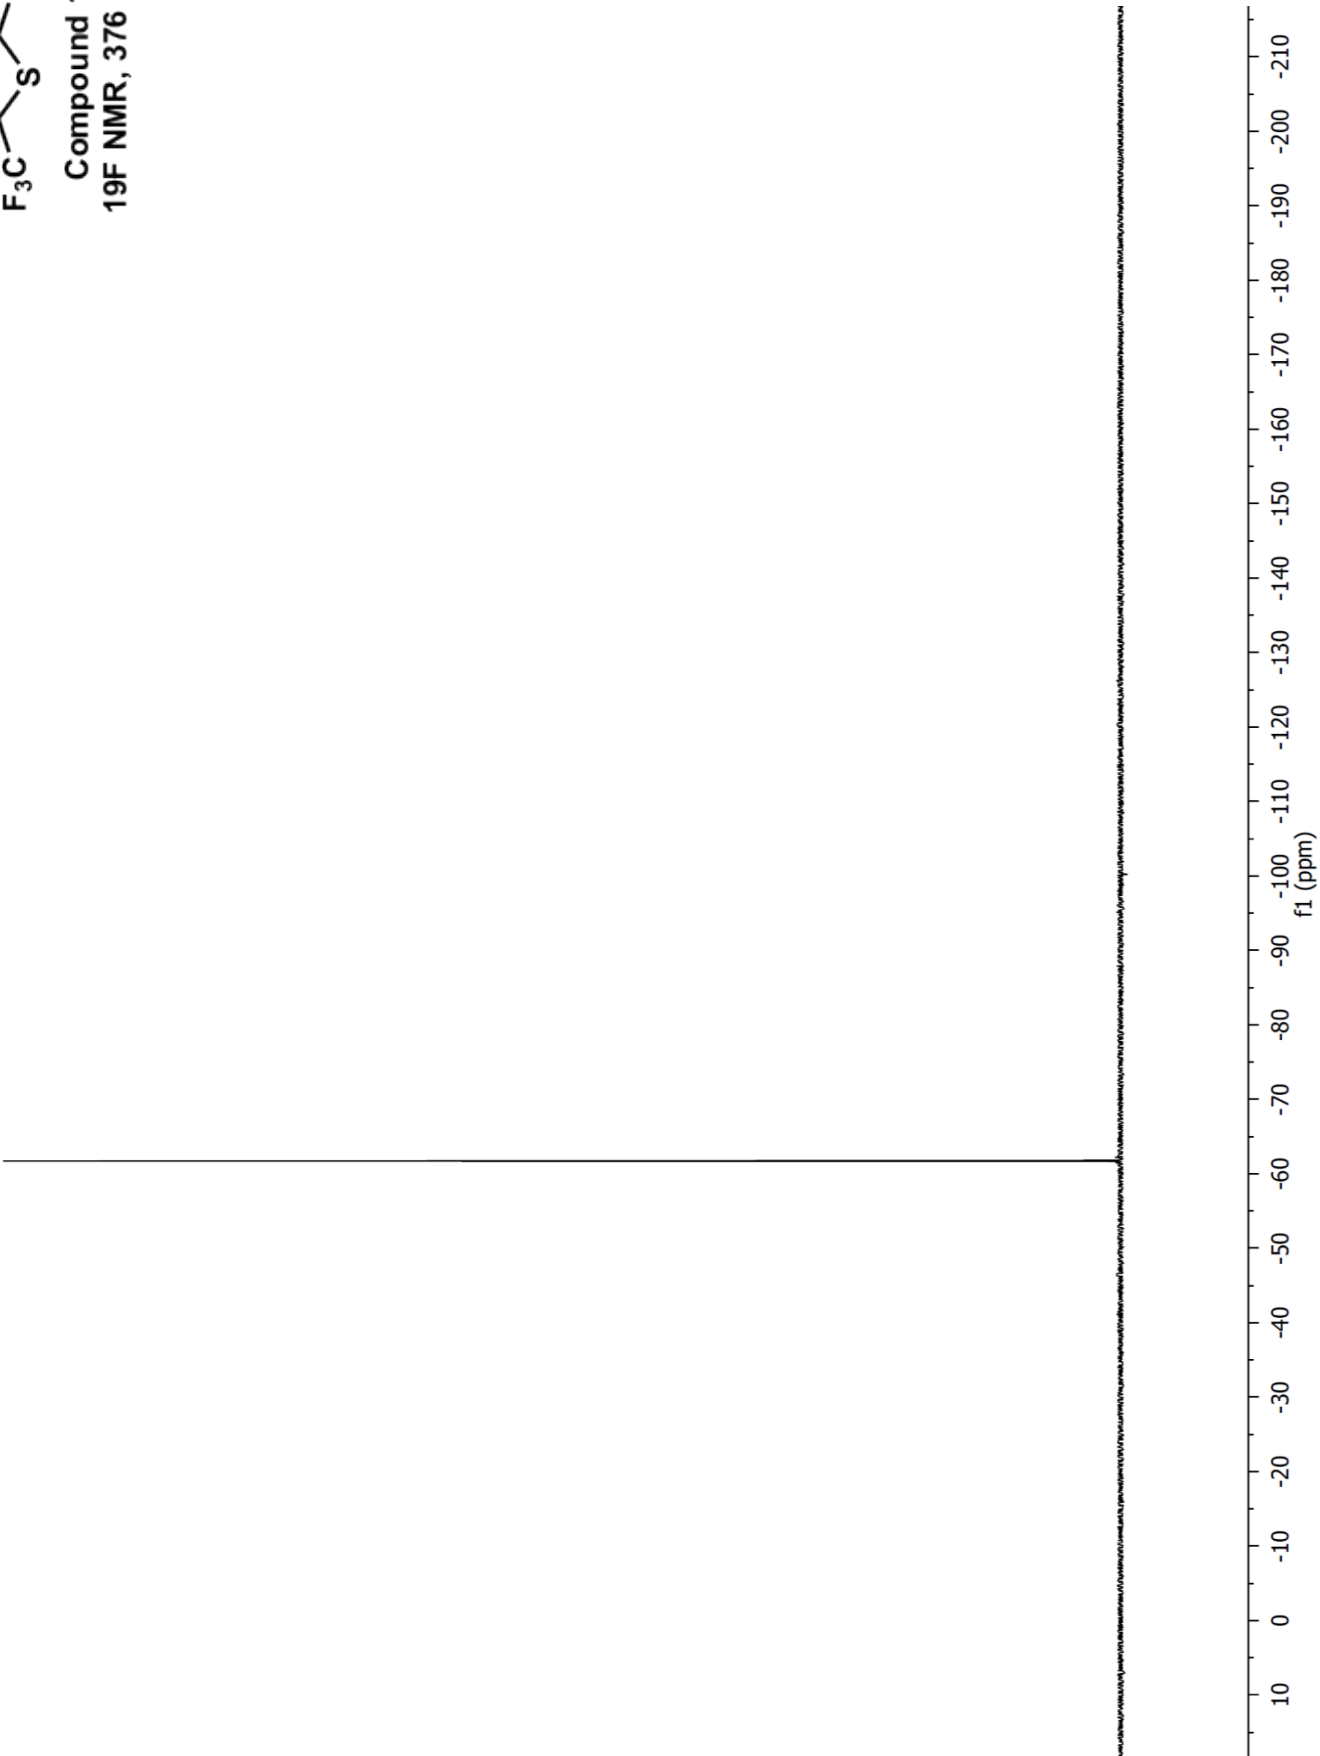

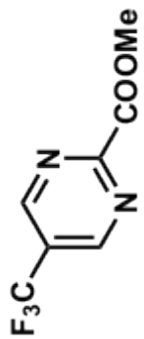

Compound 12-C5  
1H NMR, 400 MHz

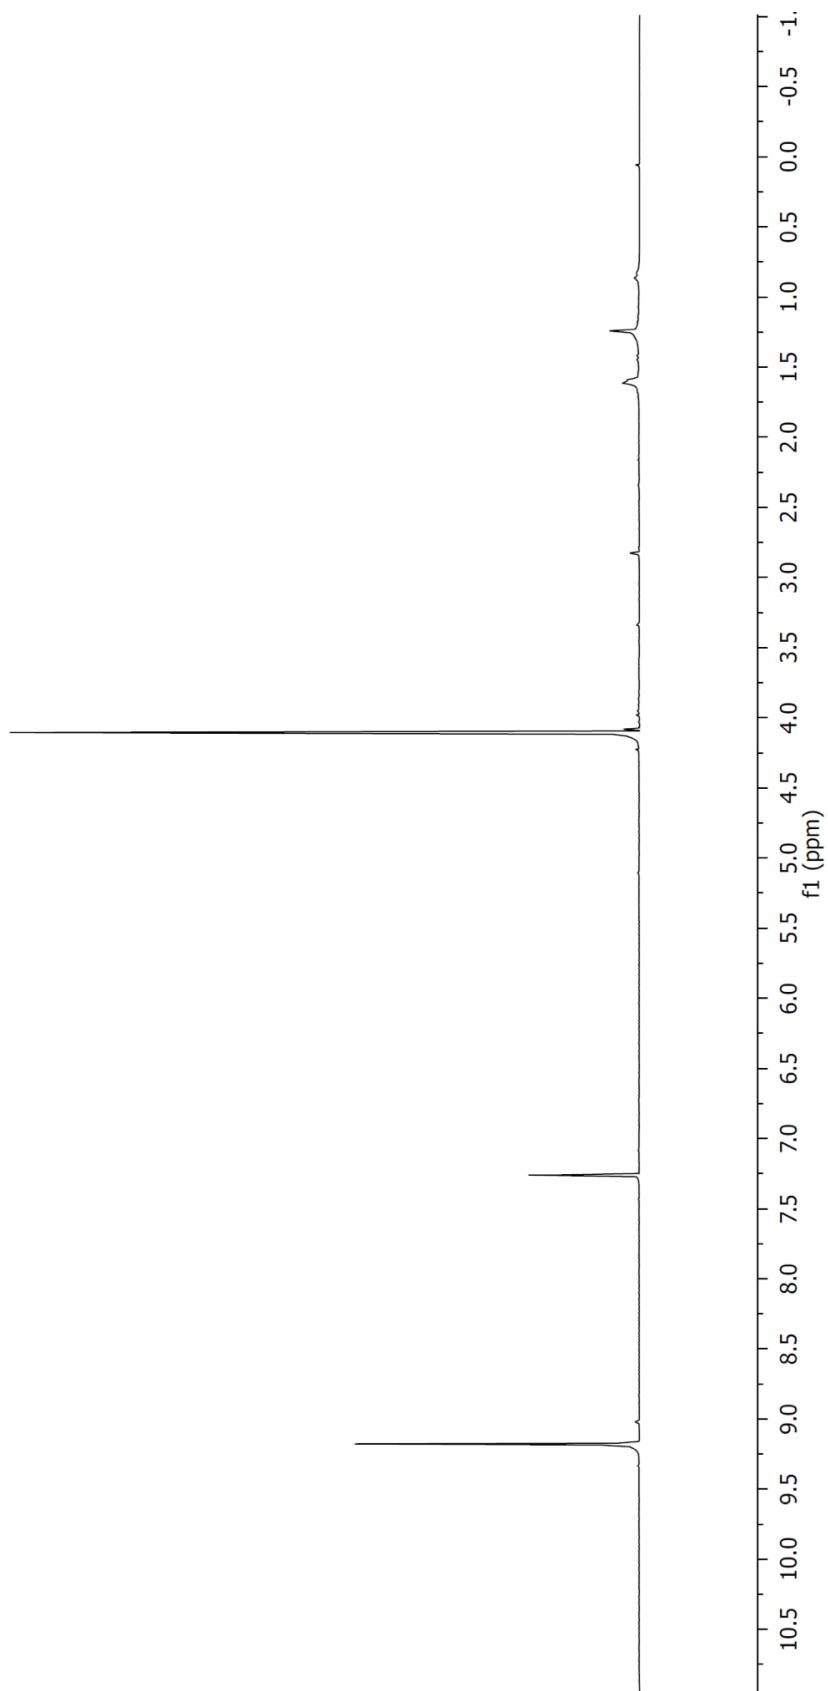

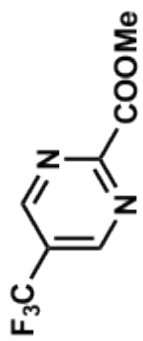

Compound 12-C5  
13C NMR, 150 MHz

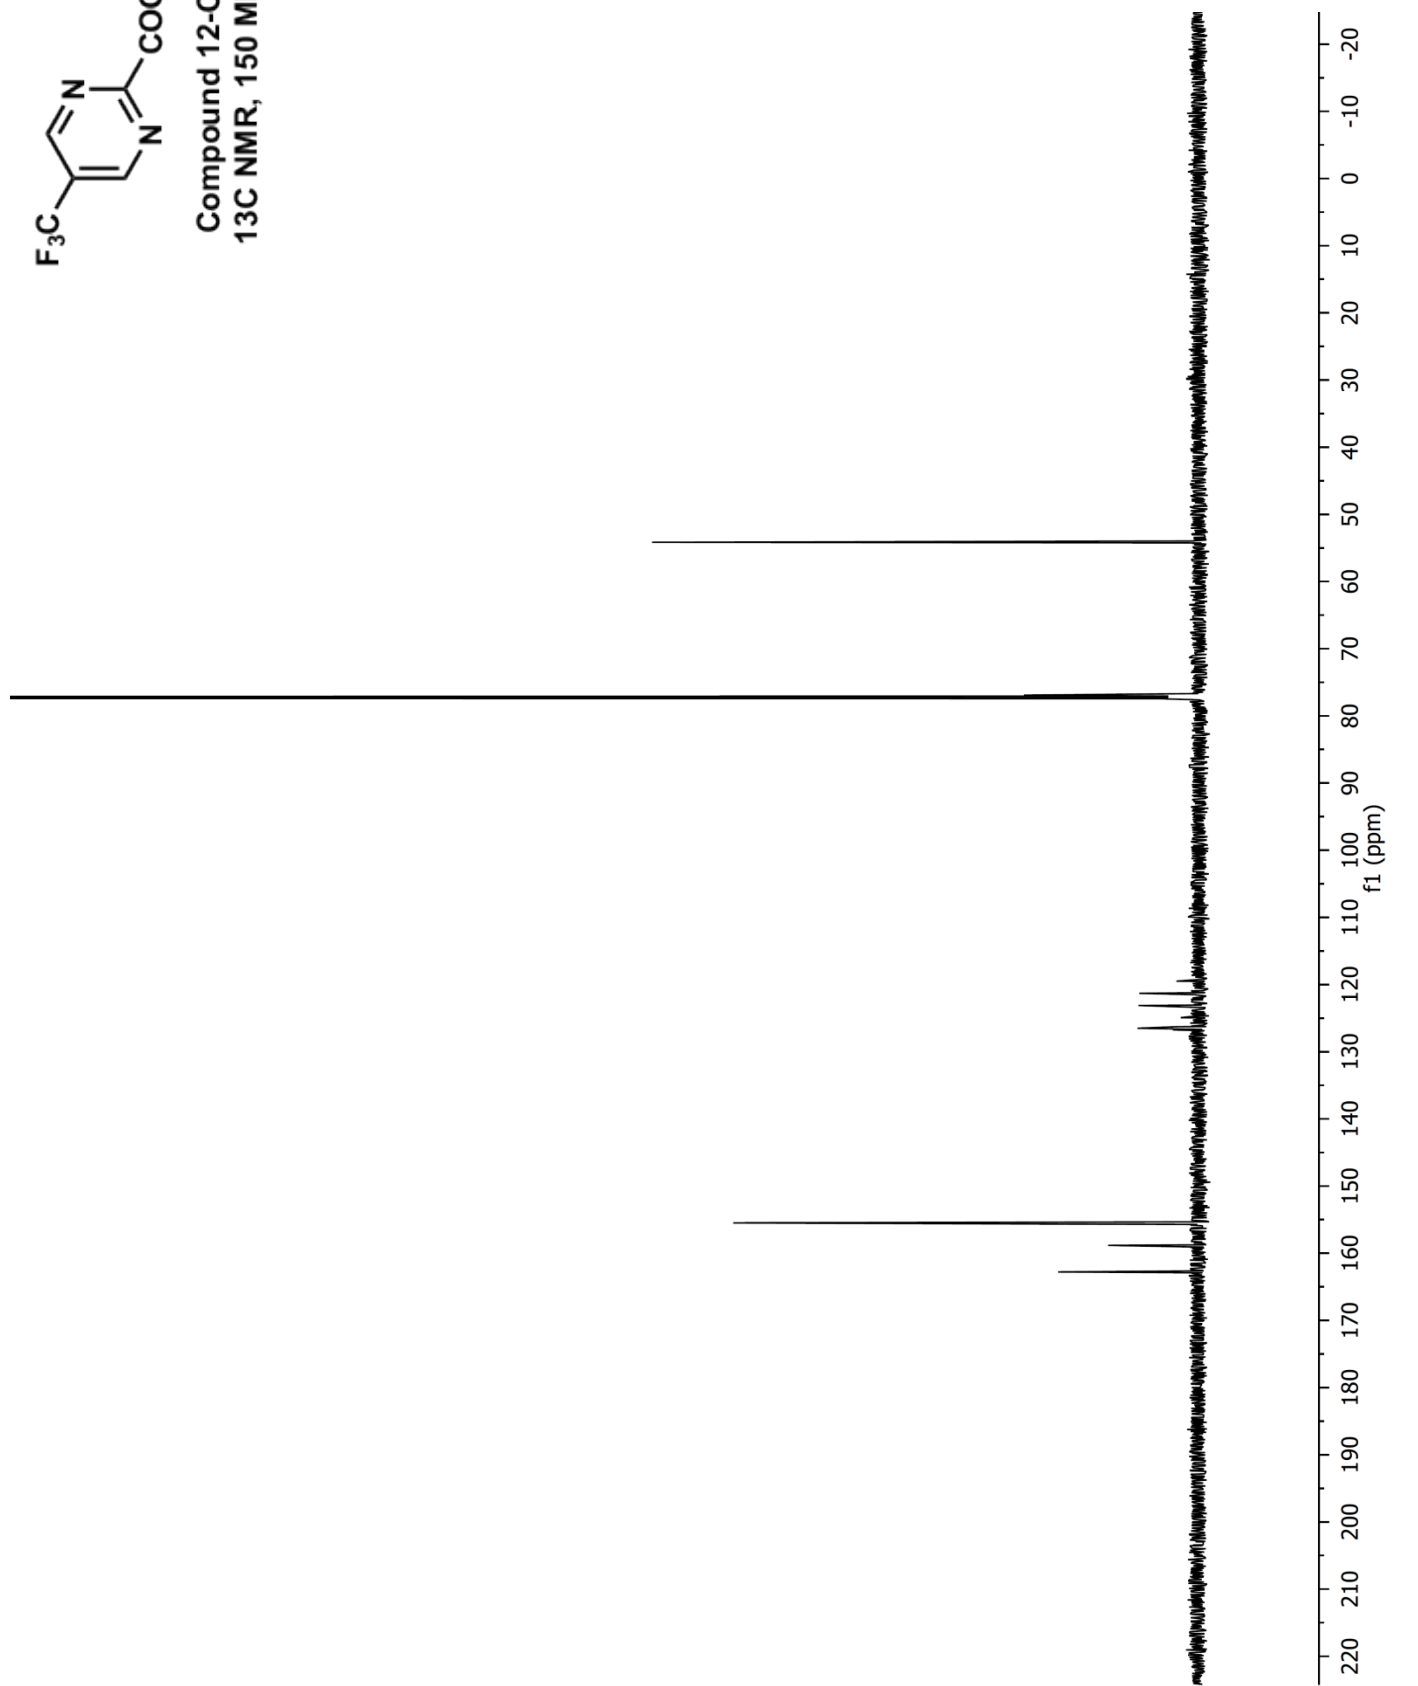

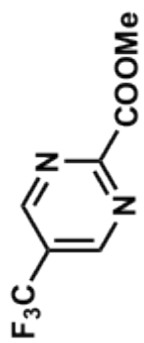

Compound 12-C5  
19F NMR, 376 MHz

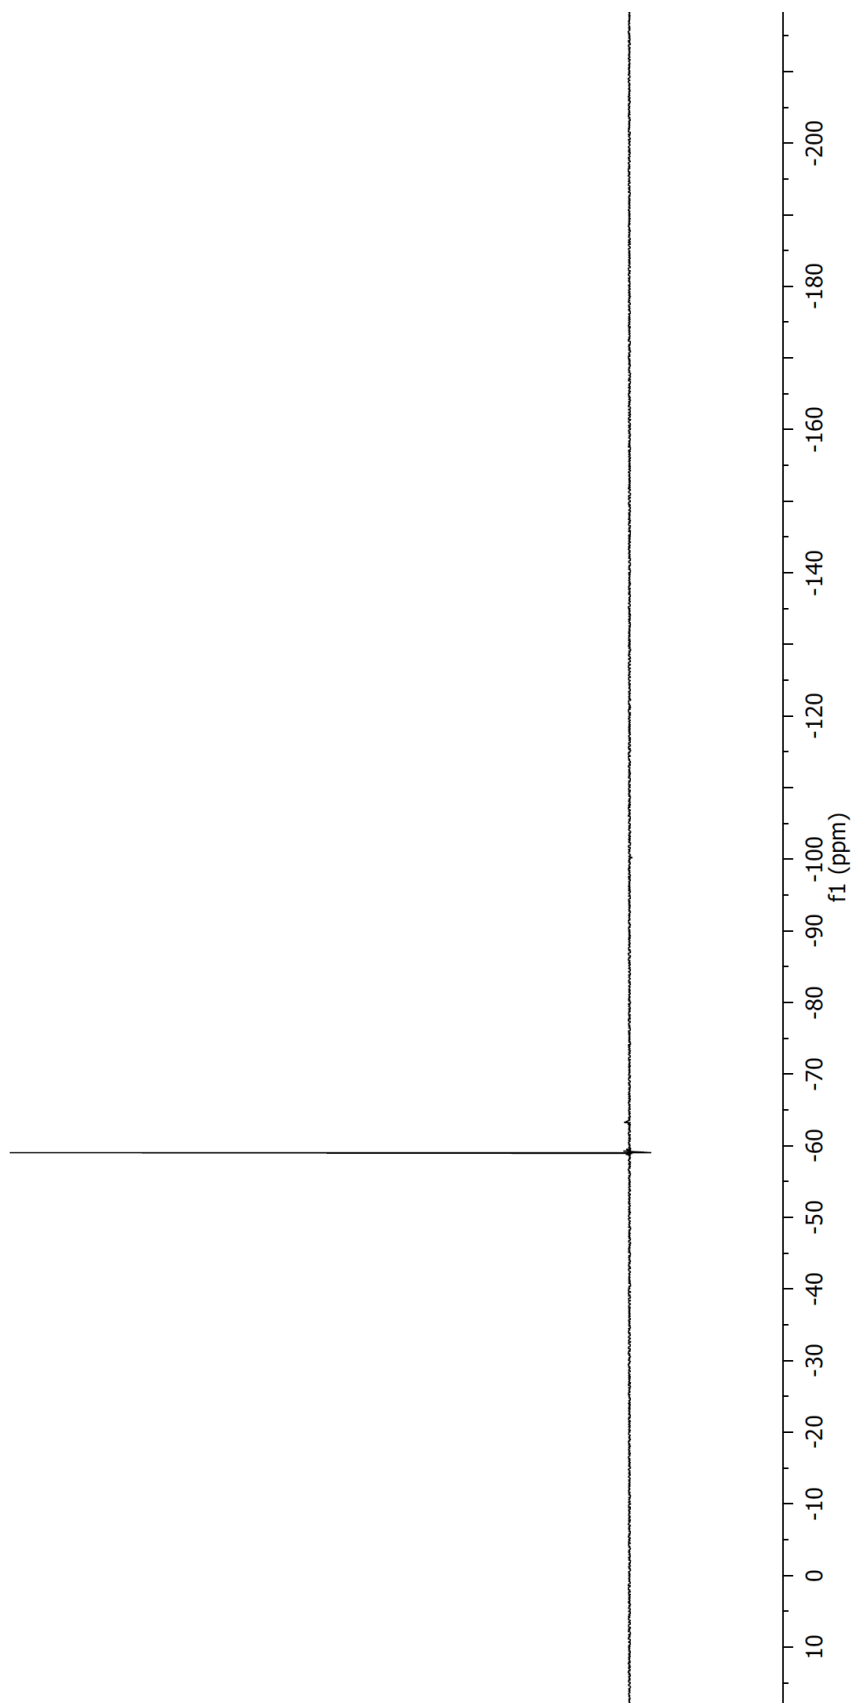



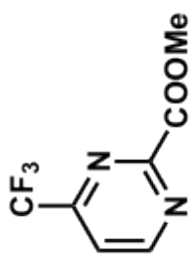

Compound 12-C4  
1H NMR, 400 MHz

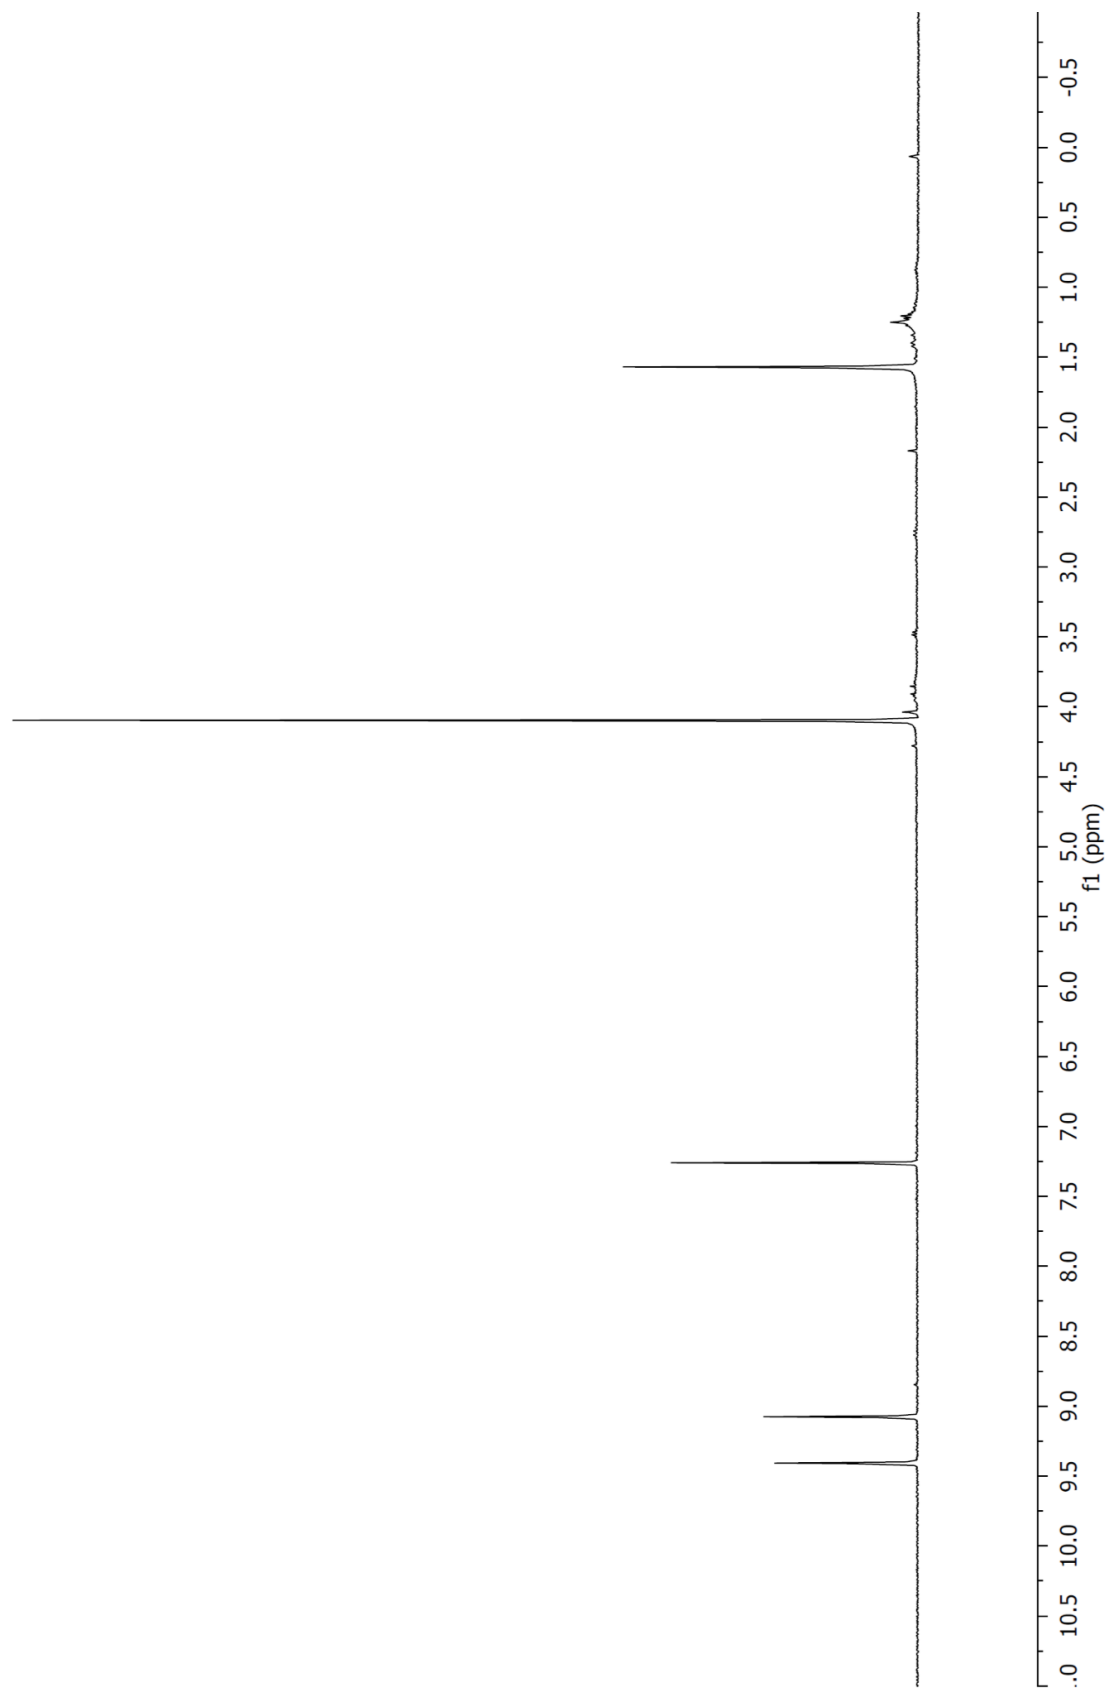

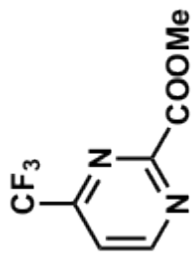

Compound 12-C4  
13C NMR, 150 MHz

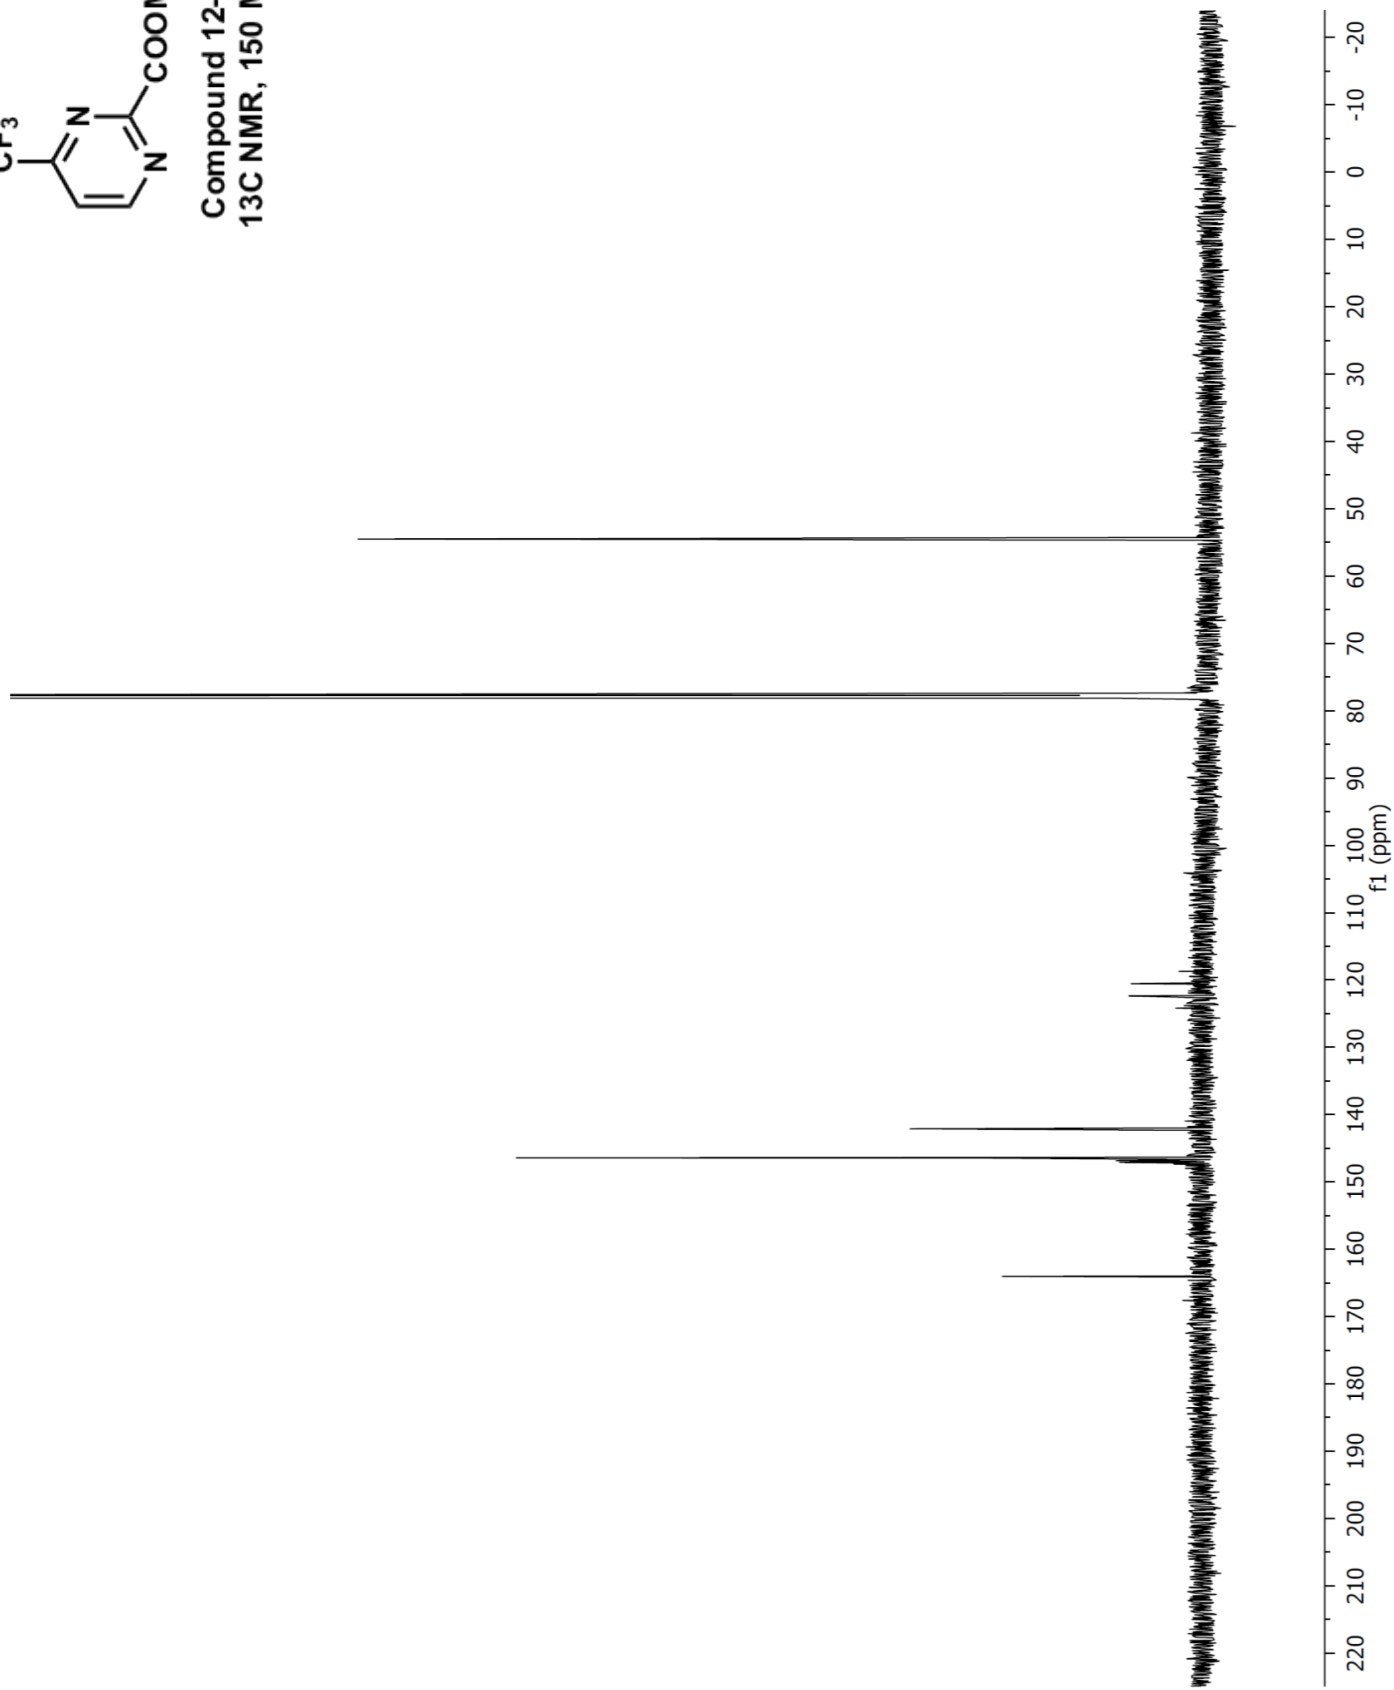

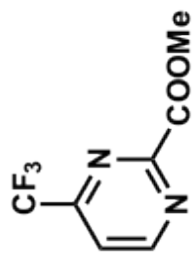

Compound 12-C4  
19F NMR, 376 MHz

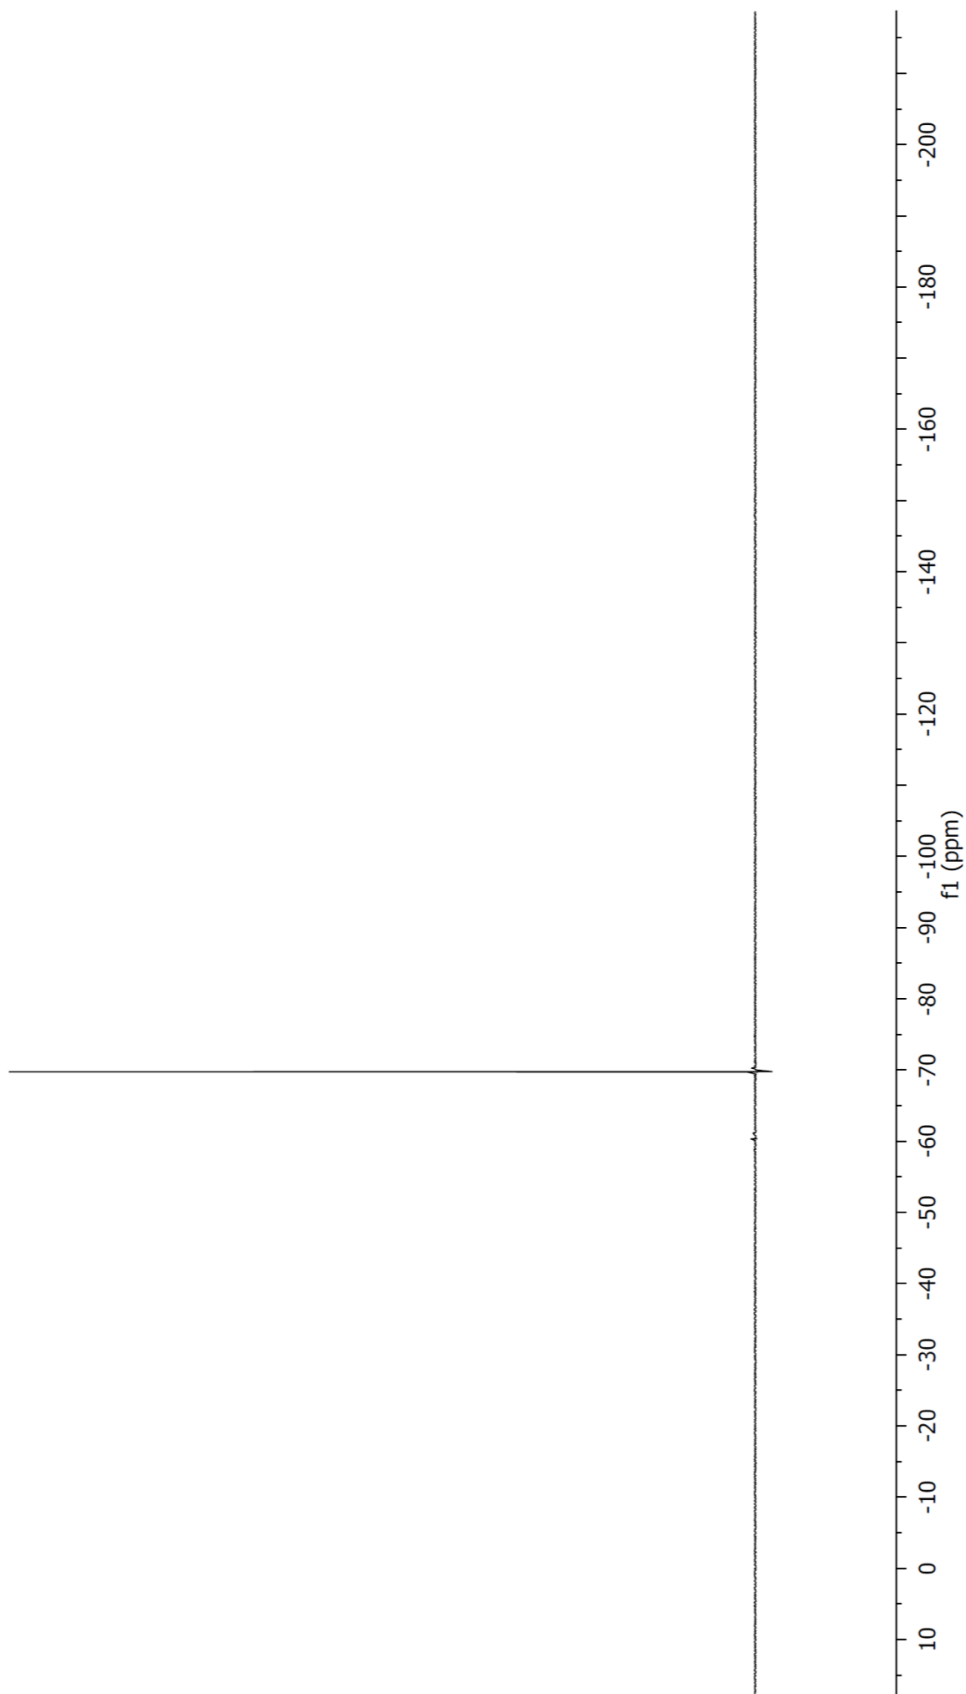

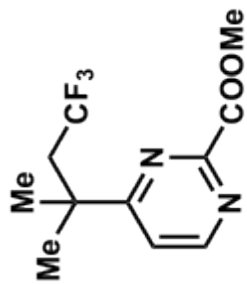

Compound 12A  
1H NMR, 400 MHz

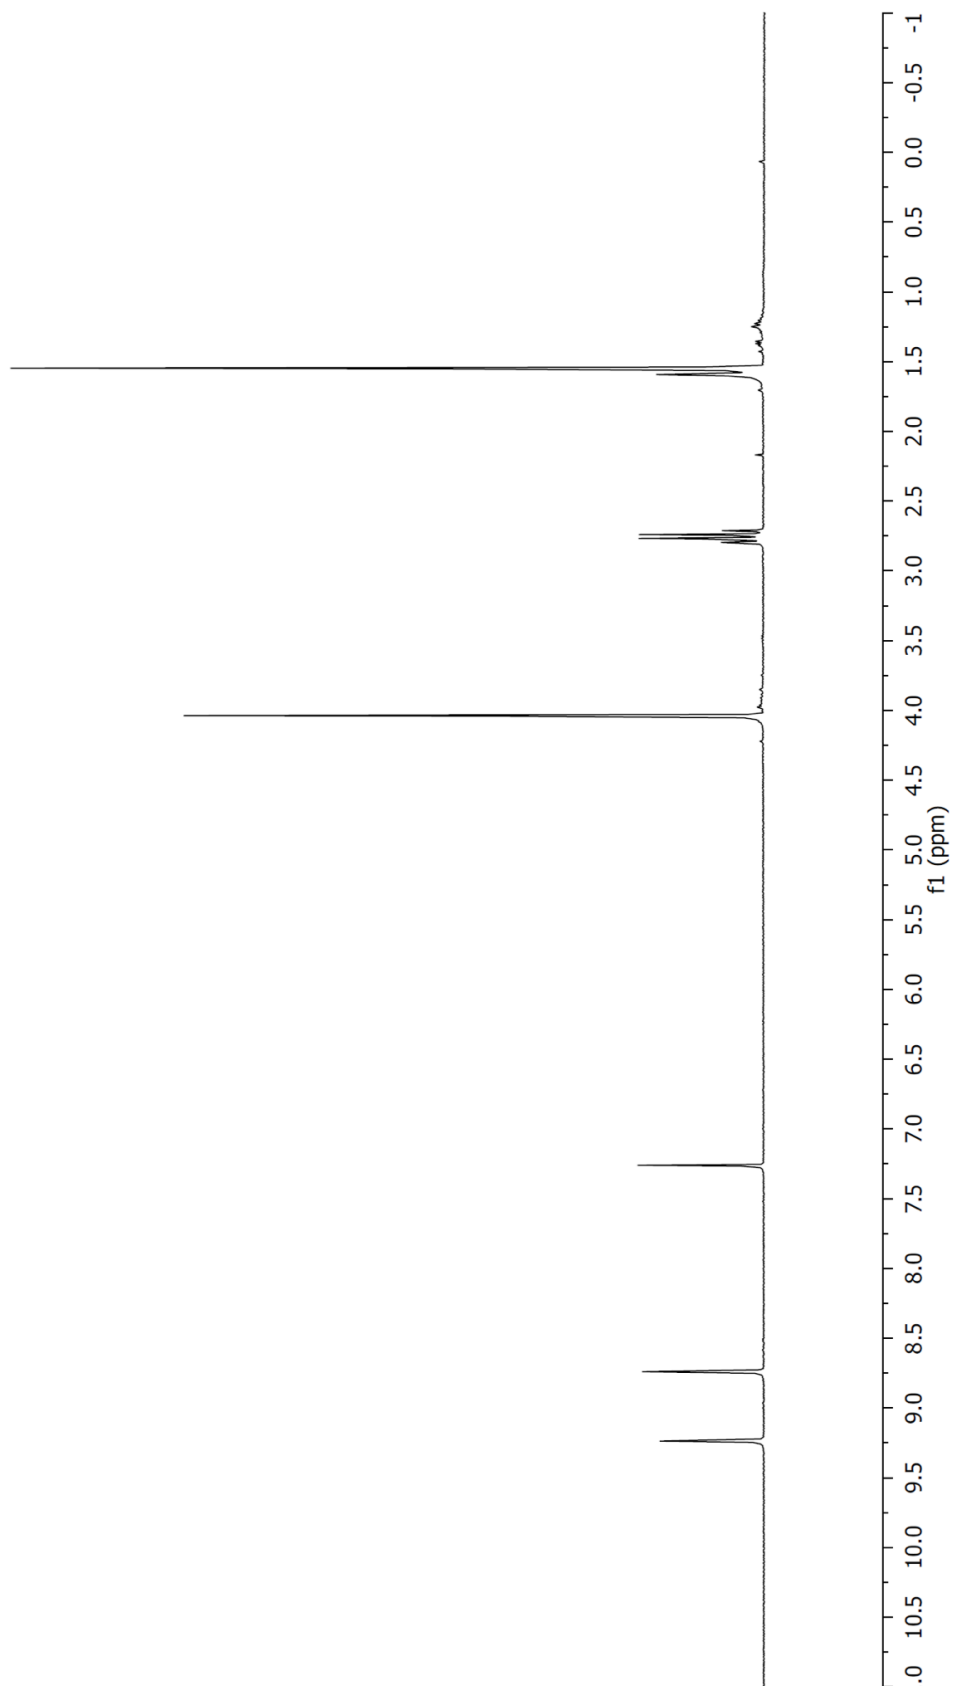

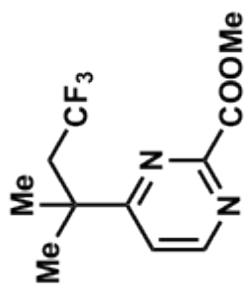

Compound 12A  
13C NMR, 150 MHz

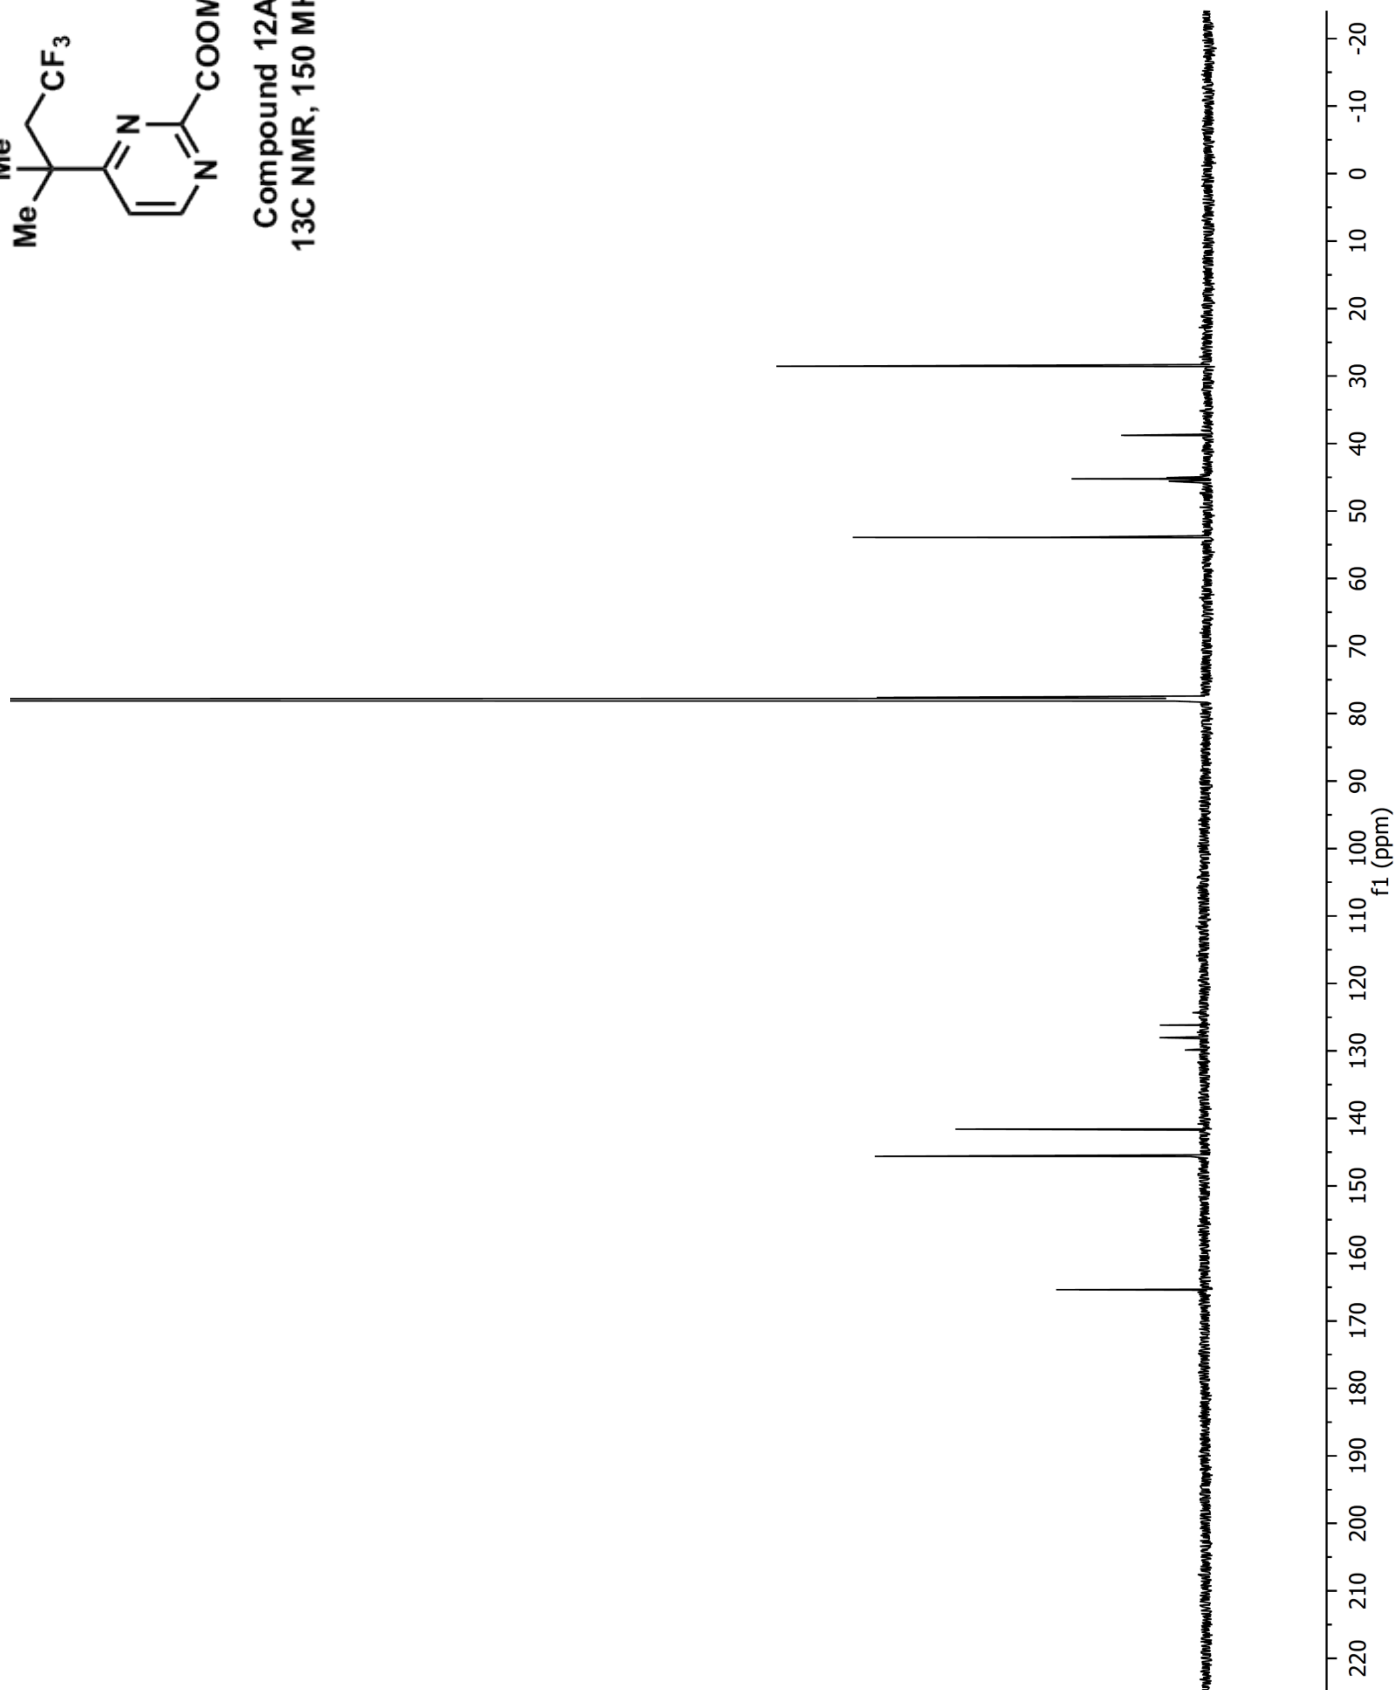

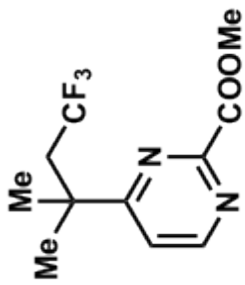

Compound 12A  
19F NMR, 376 MHz

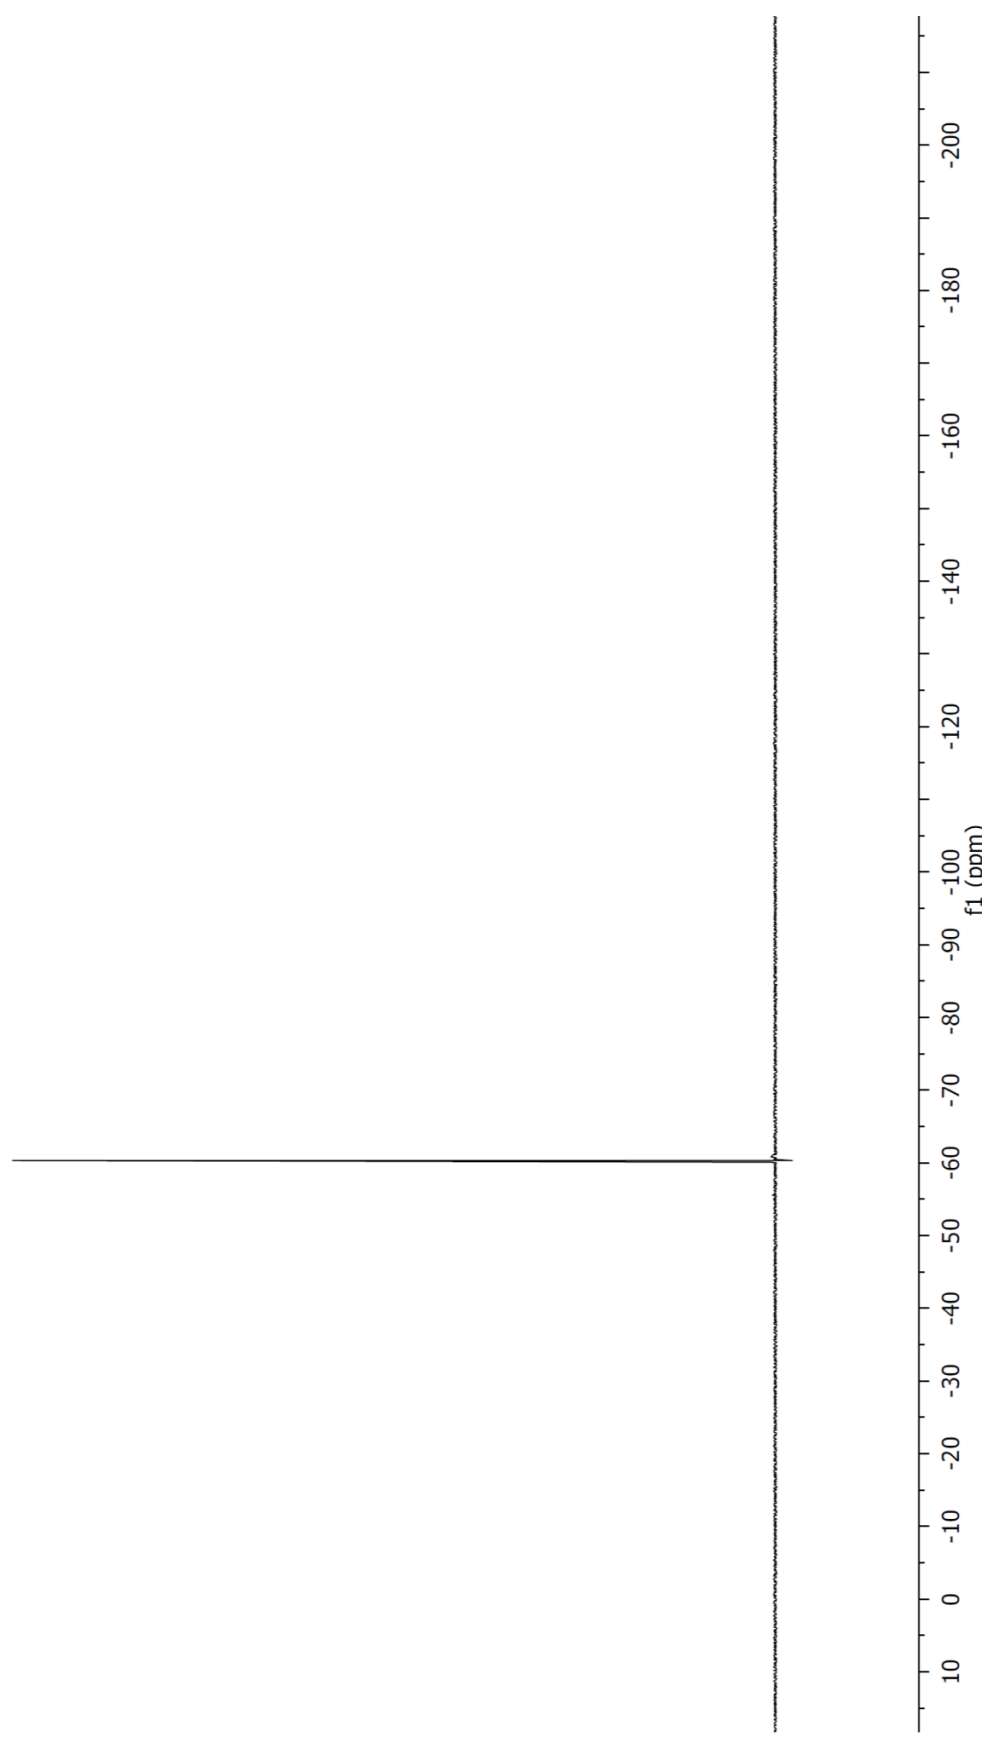

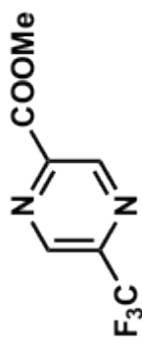

Compound 13  
1H NMR, 400 MHz

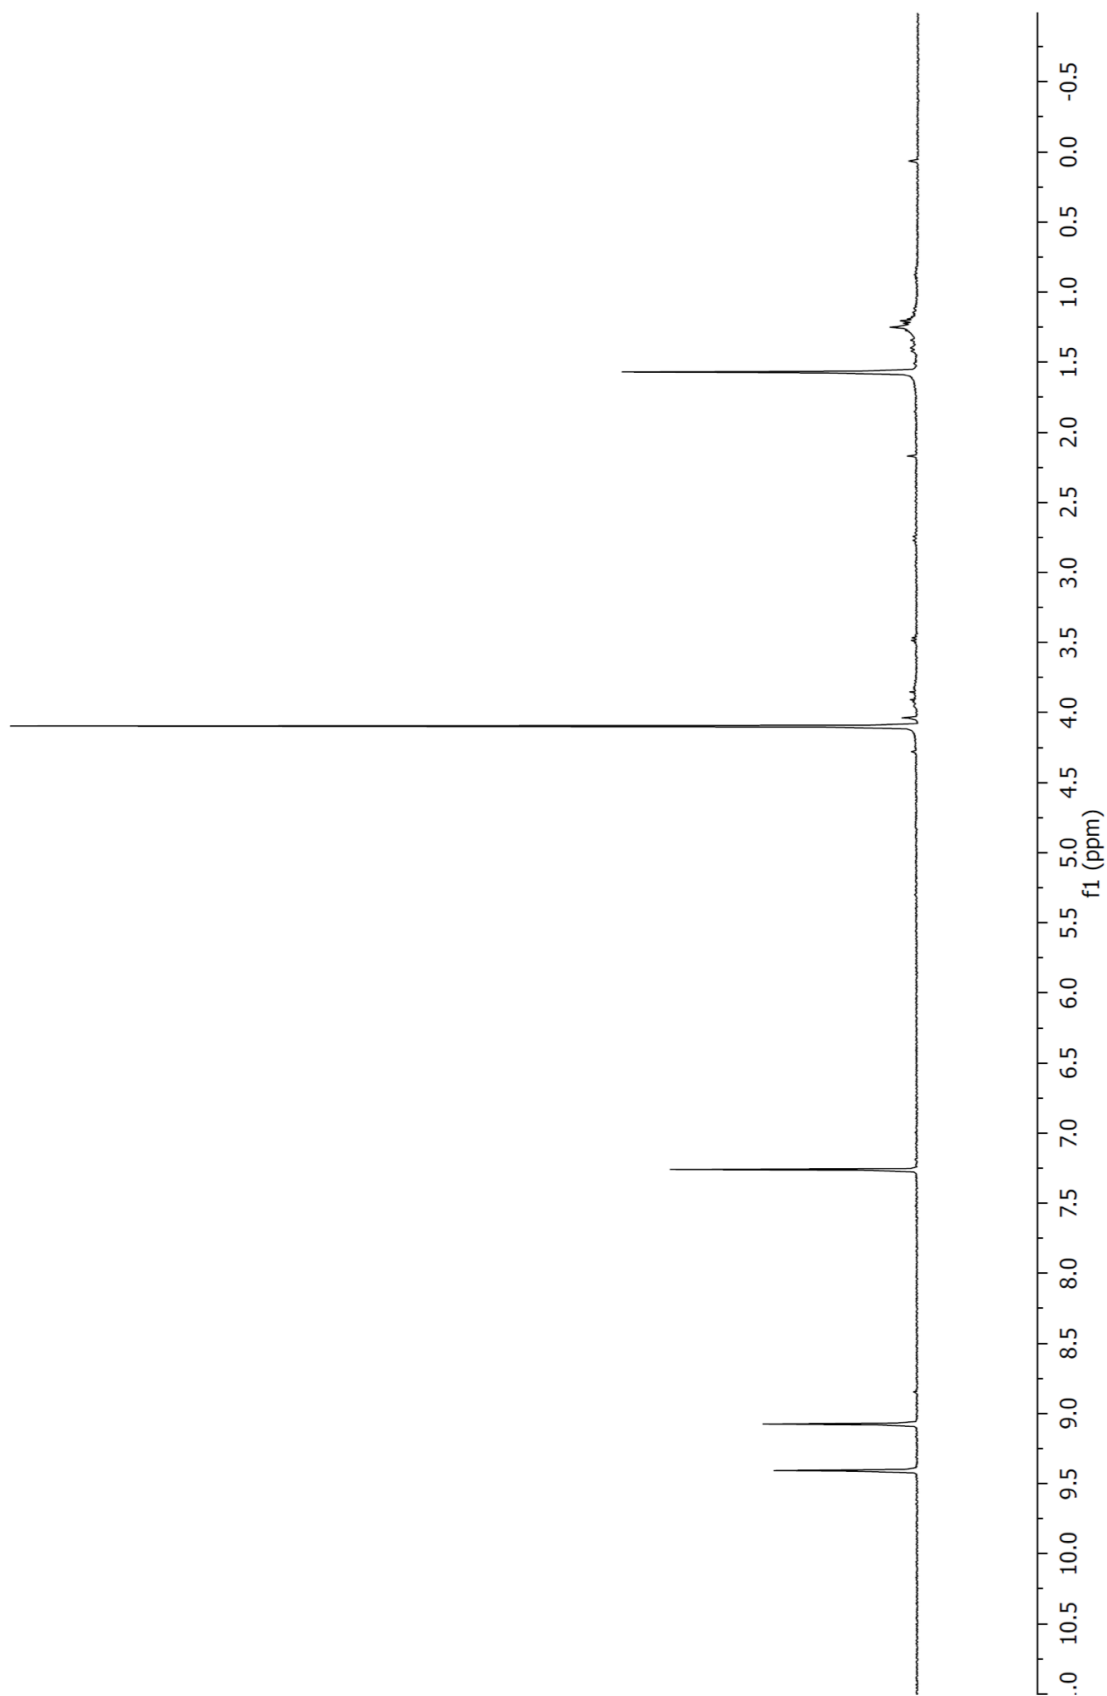

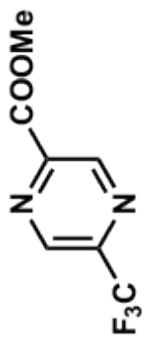

Compound 13

$^{13}\text{C}$  NMR, 150 MHz

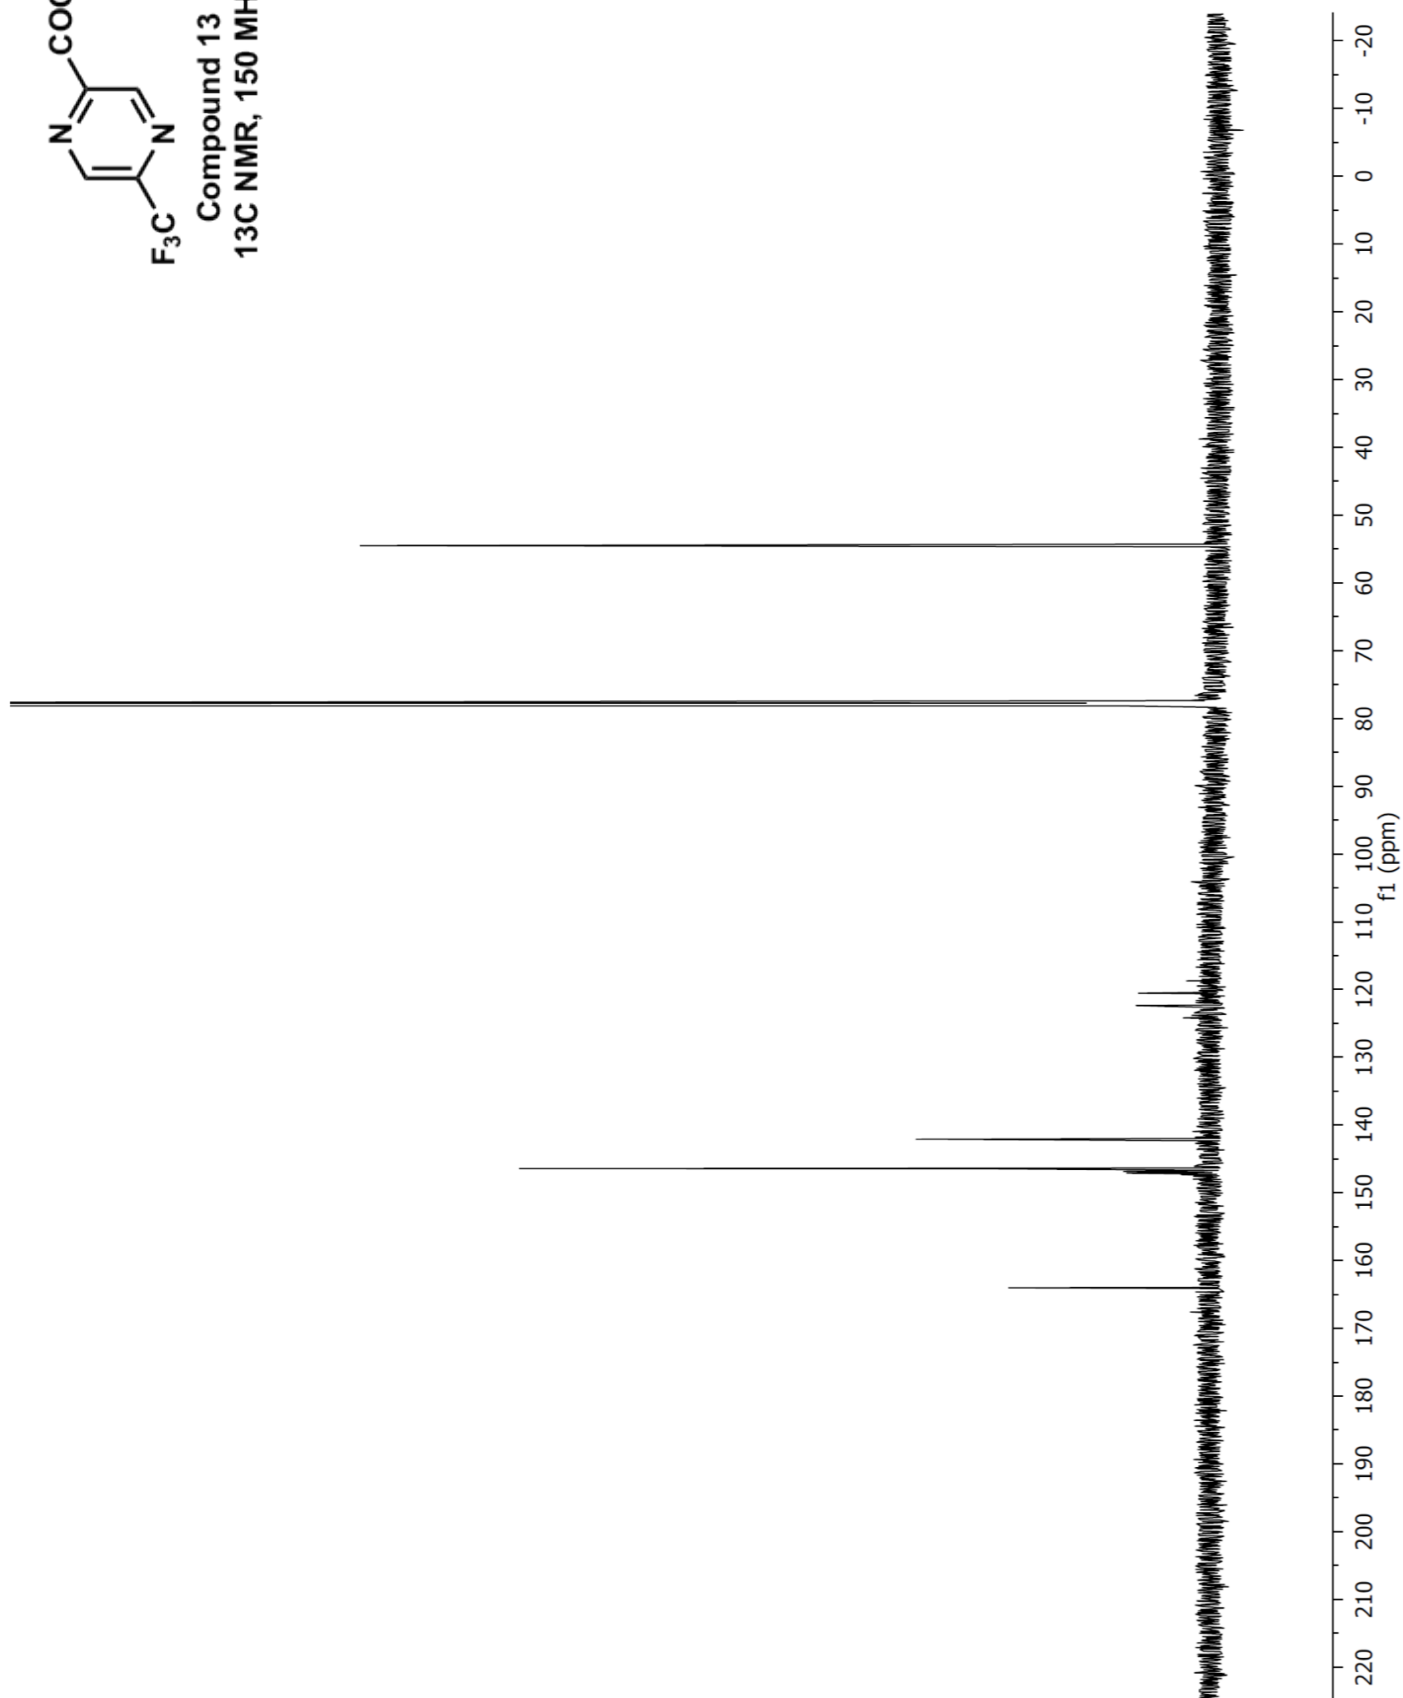





Compound 13

$^{19}\text{F}$  NMR, 376 MHz

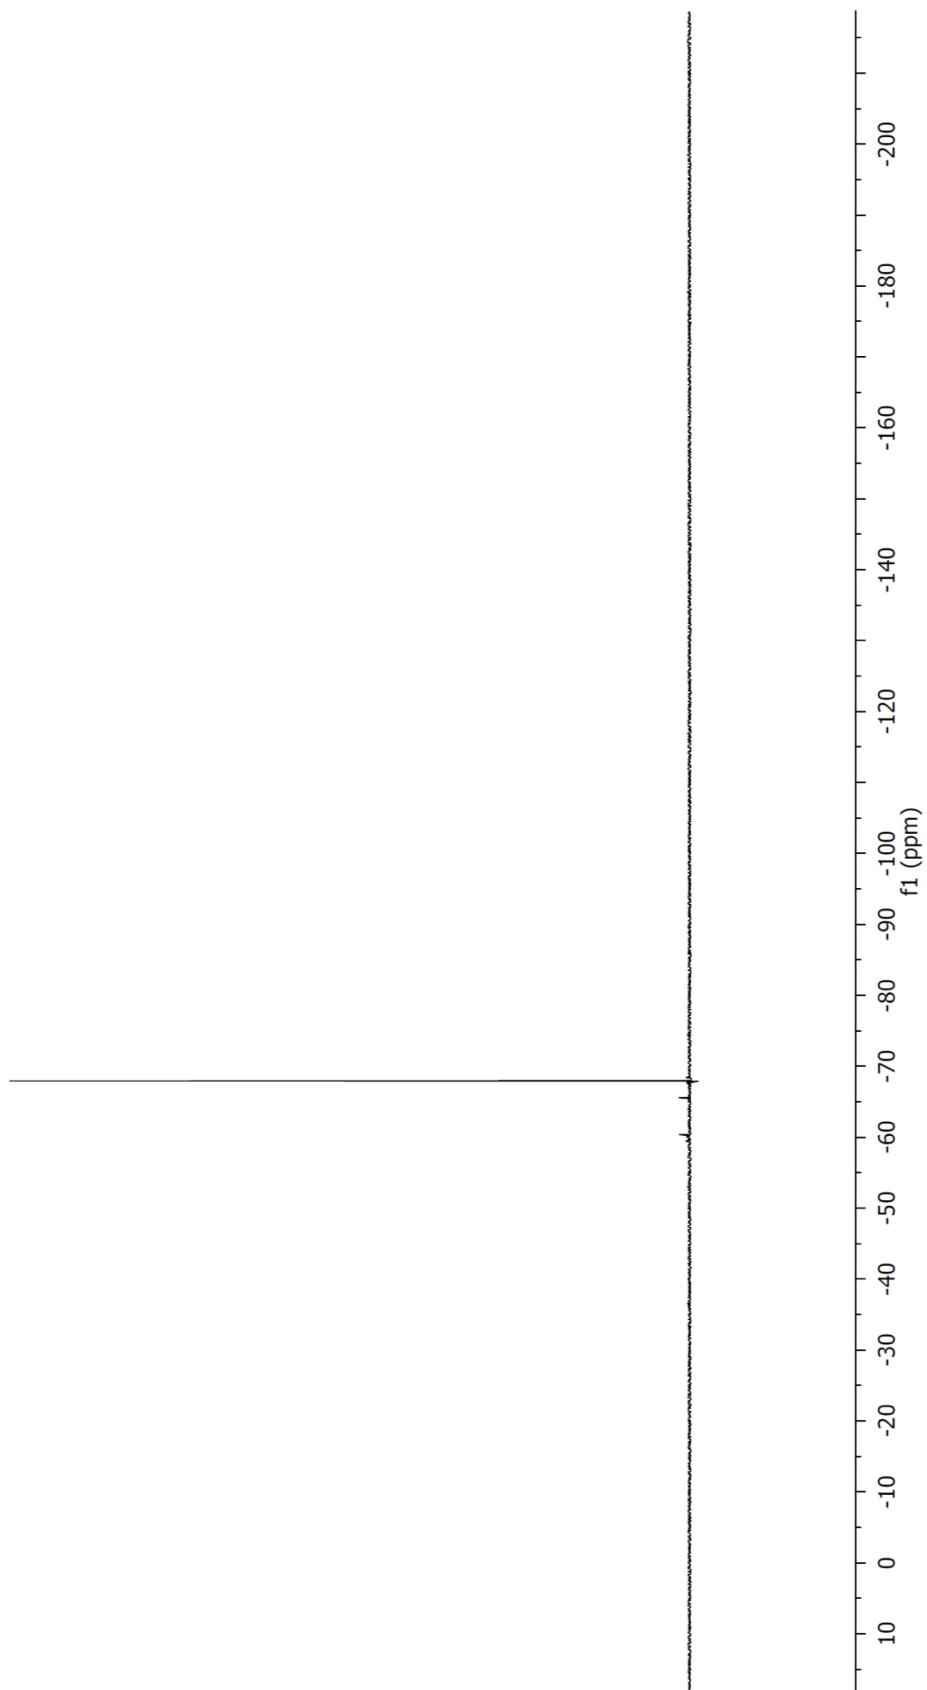

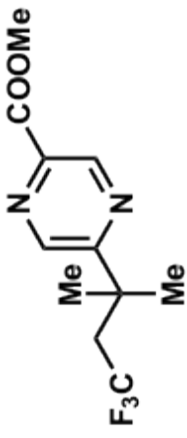

Compound 13A  
1H NMR, 400 MHz

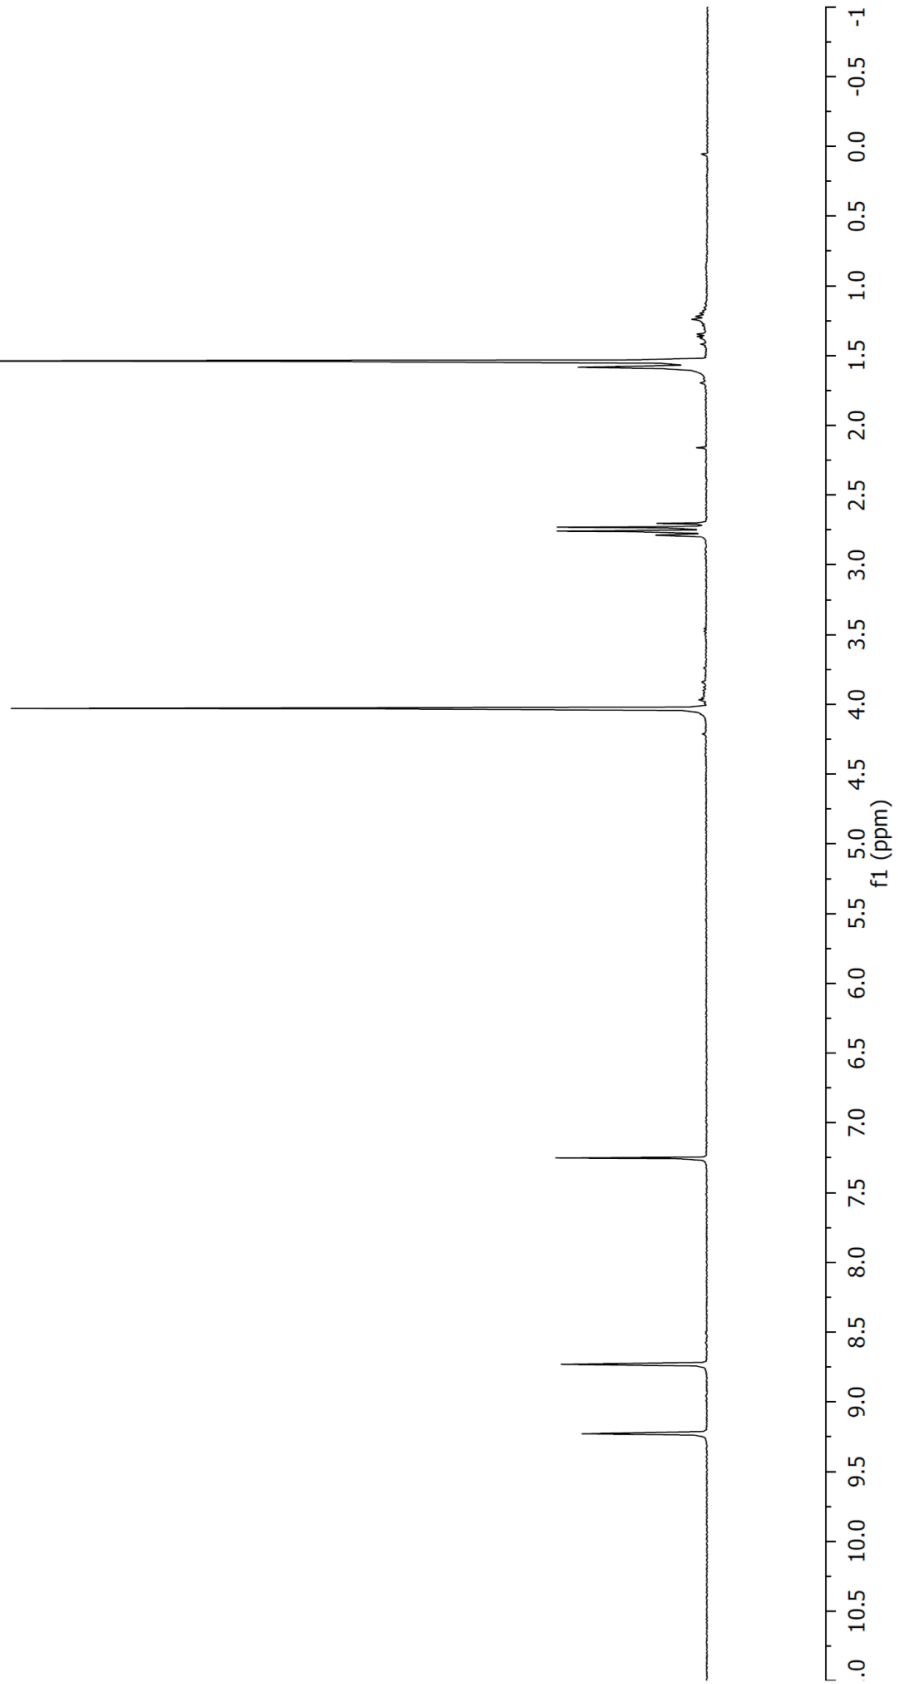

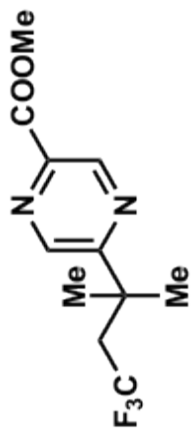

Compound 13A  
13C NMR, 150 MHz

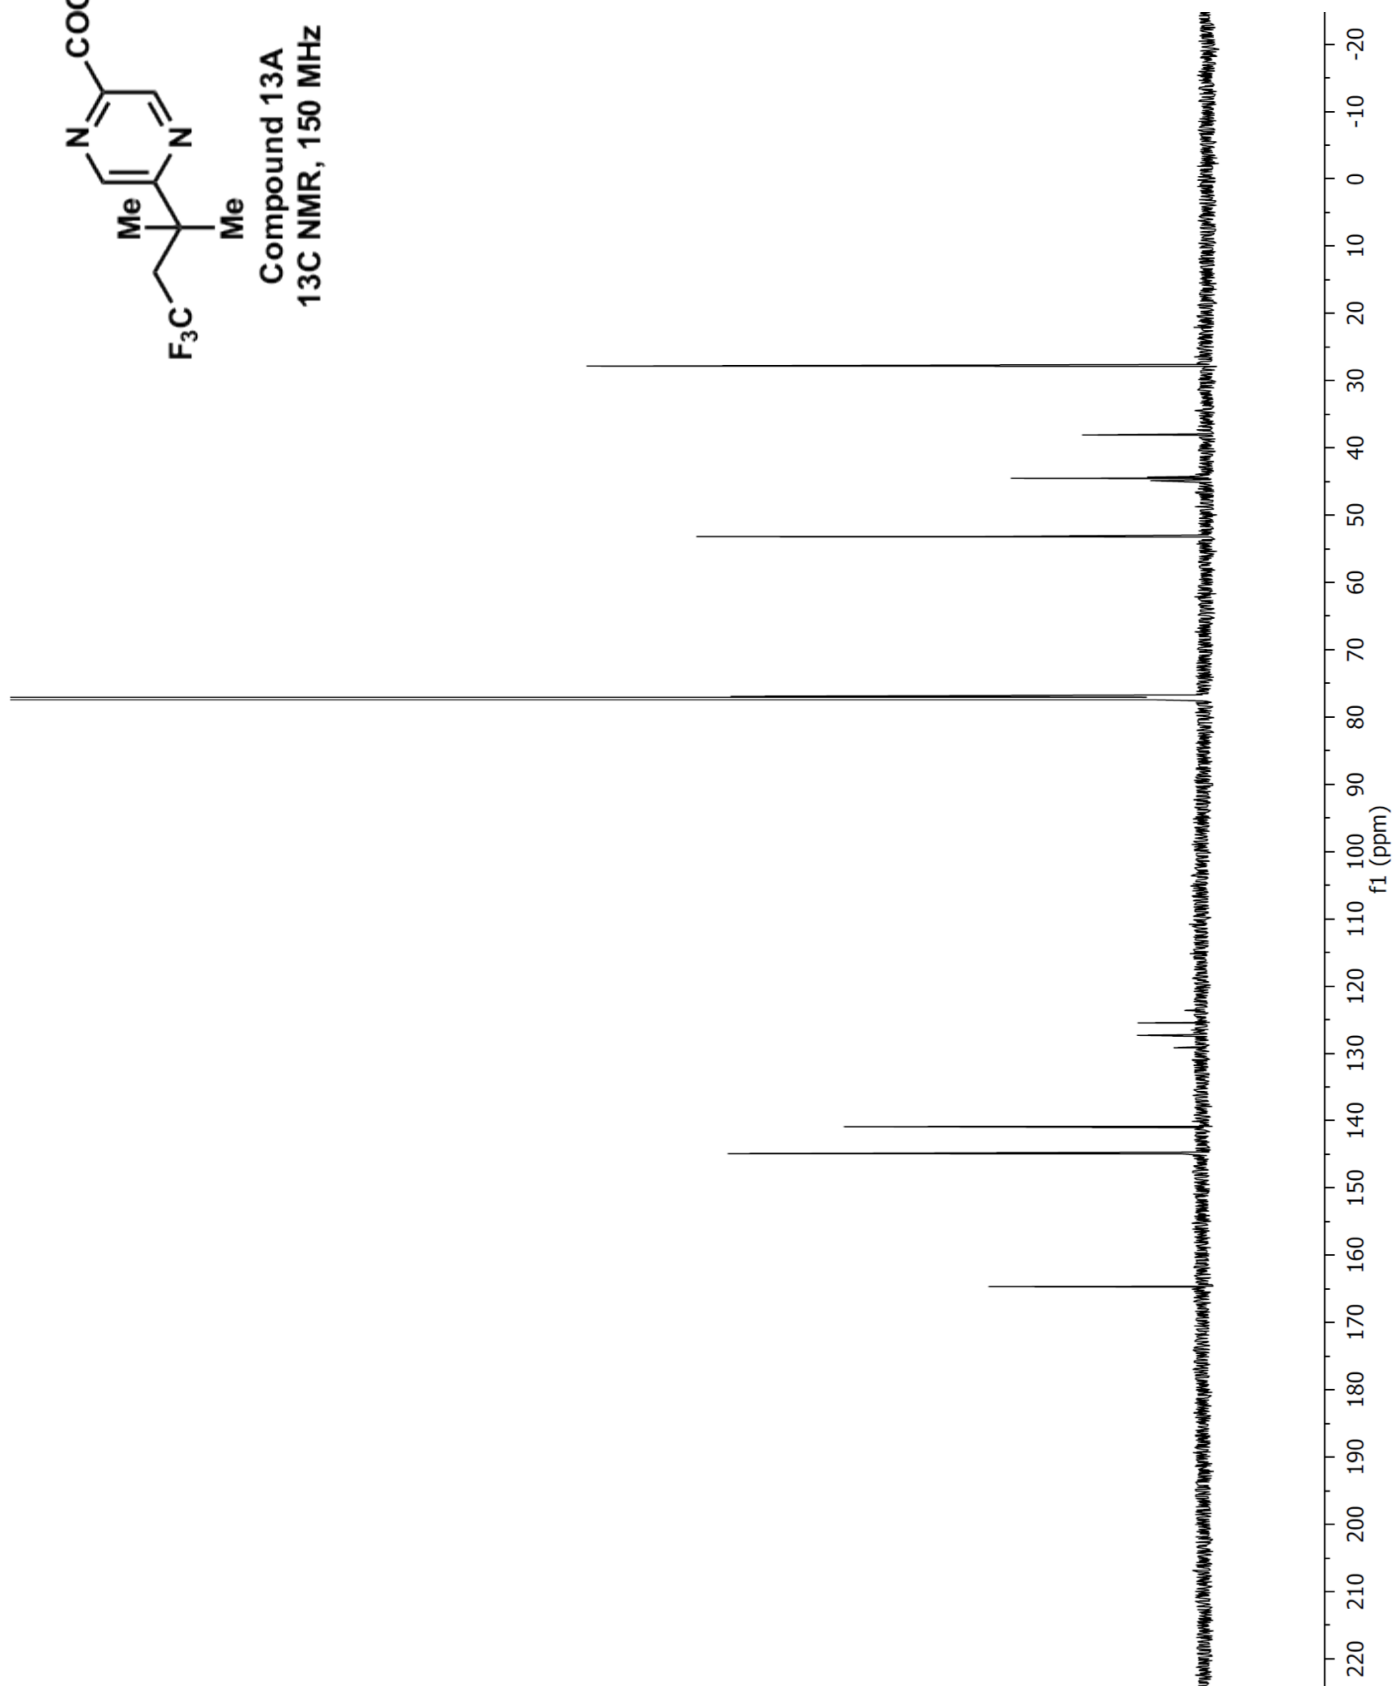

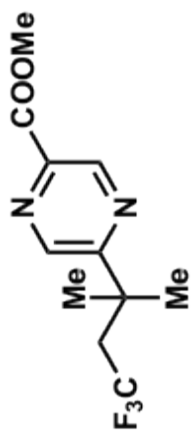

Compound 13A  
19F NMR, 376 MHz

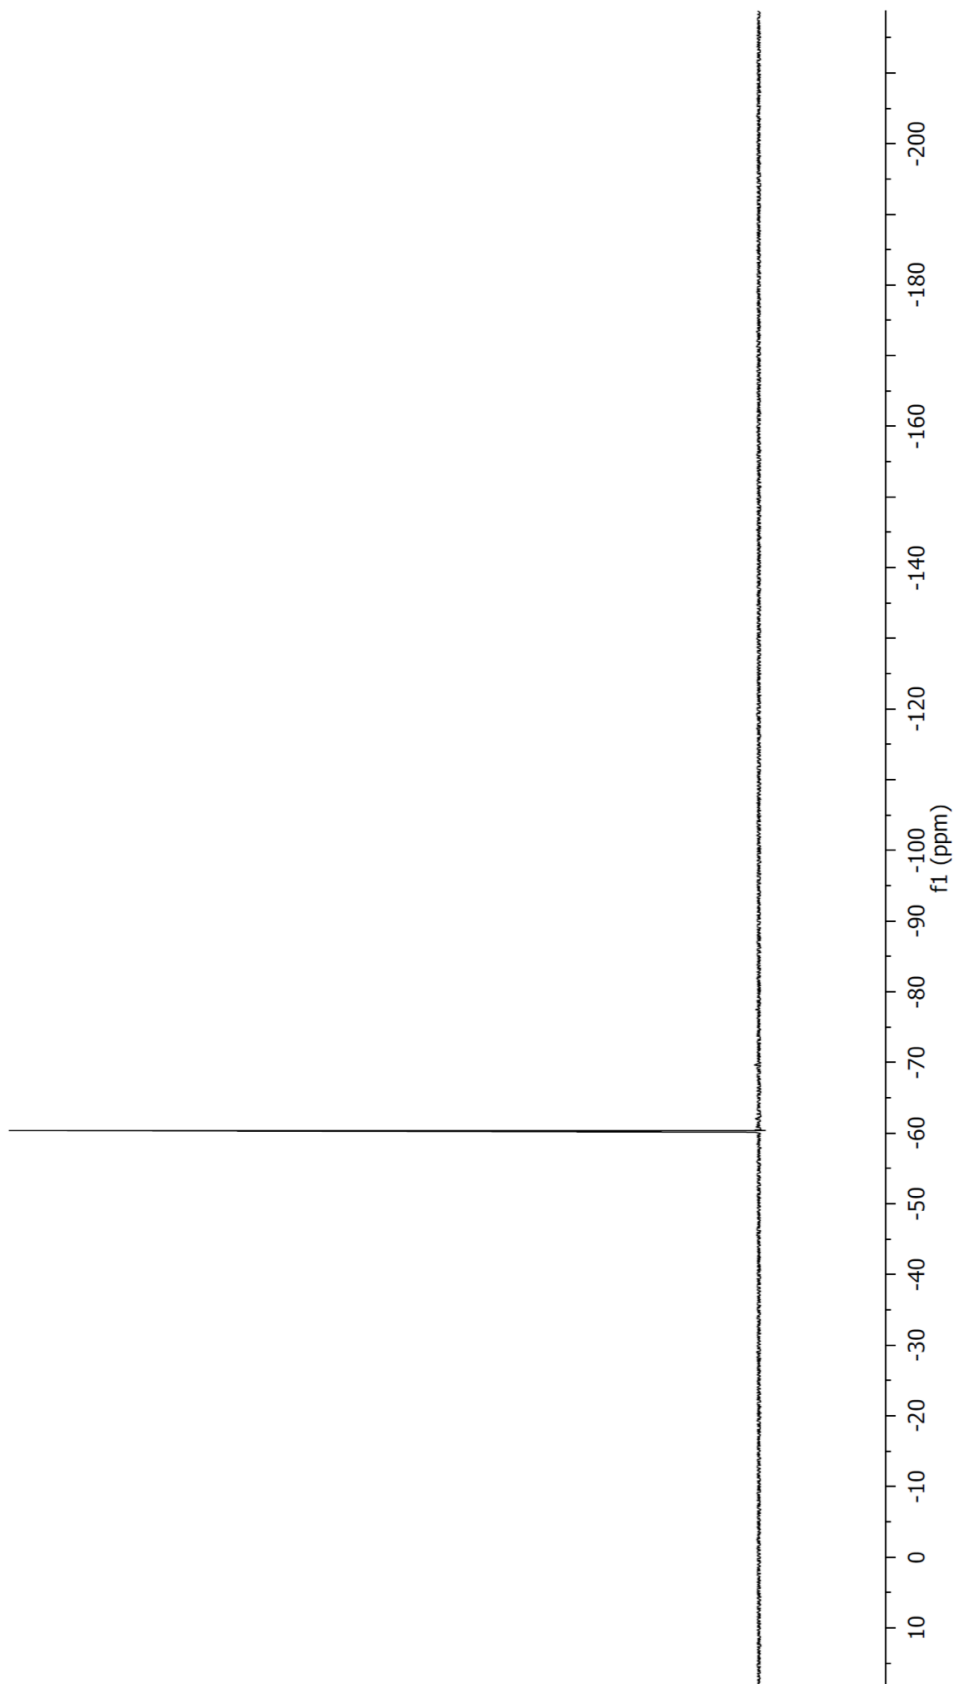

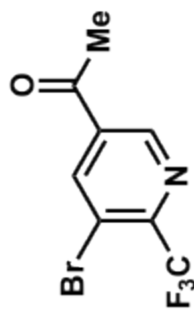

Compound 14-C2  
1H NMR, 400 MHz

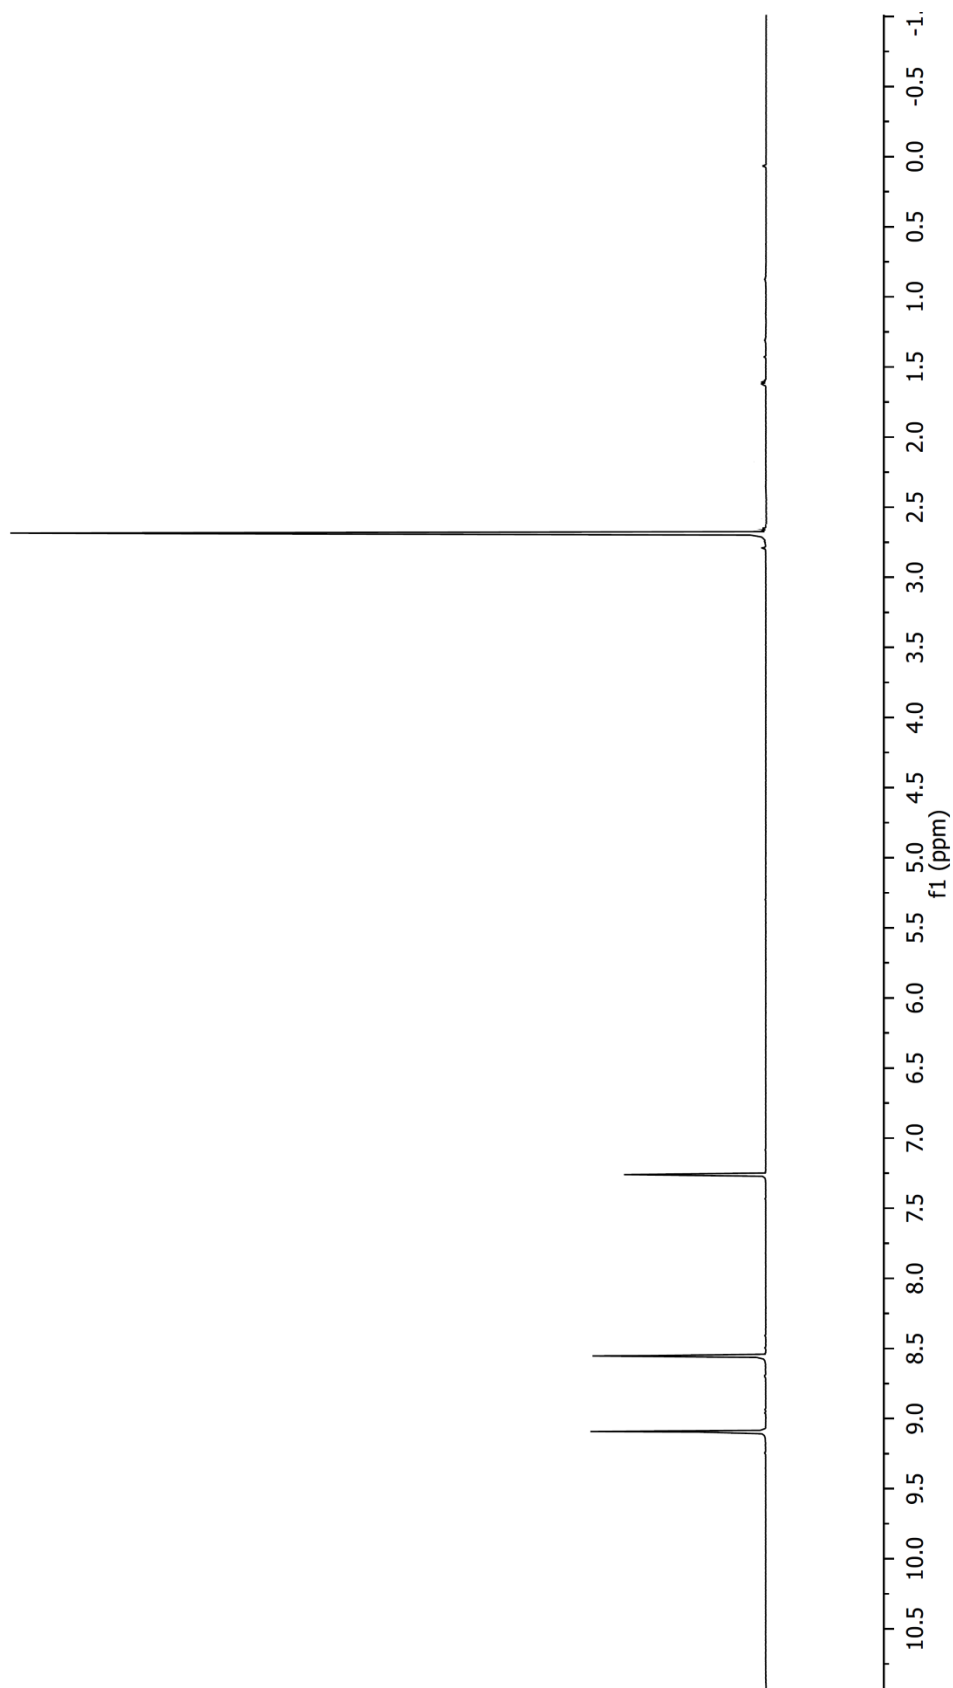

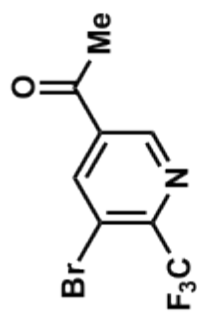

Compound 14-C2  
13C NMR, 150 MHz

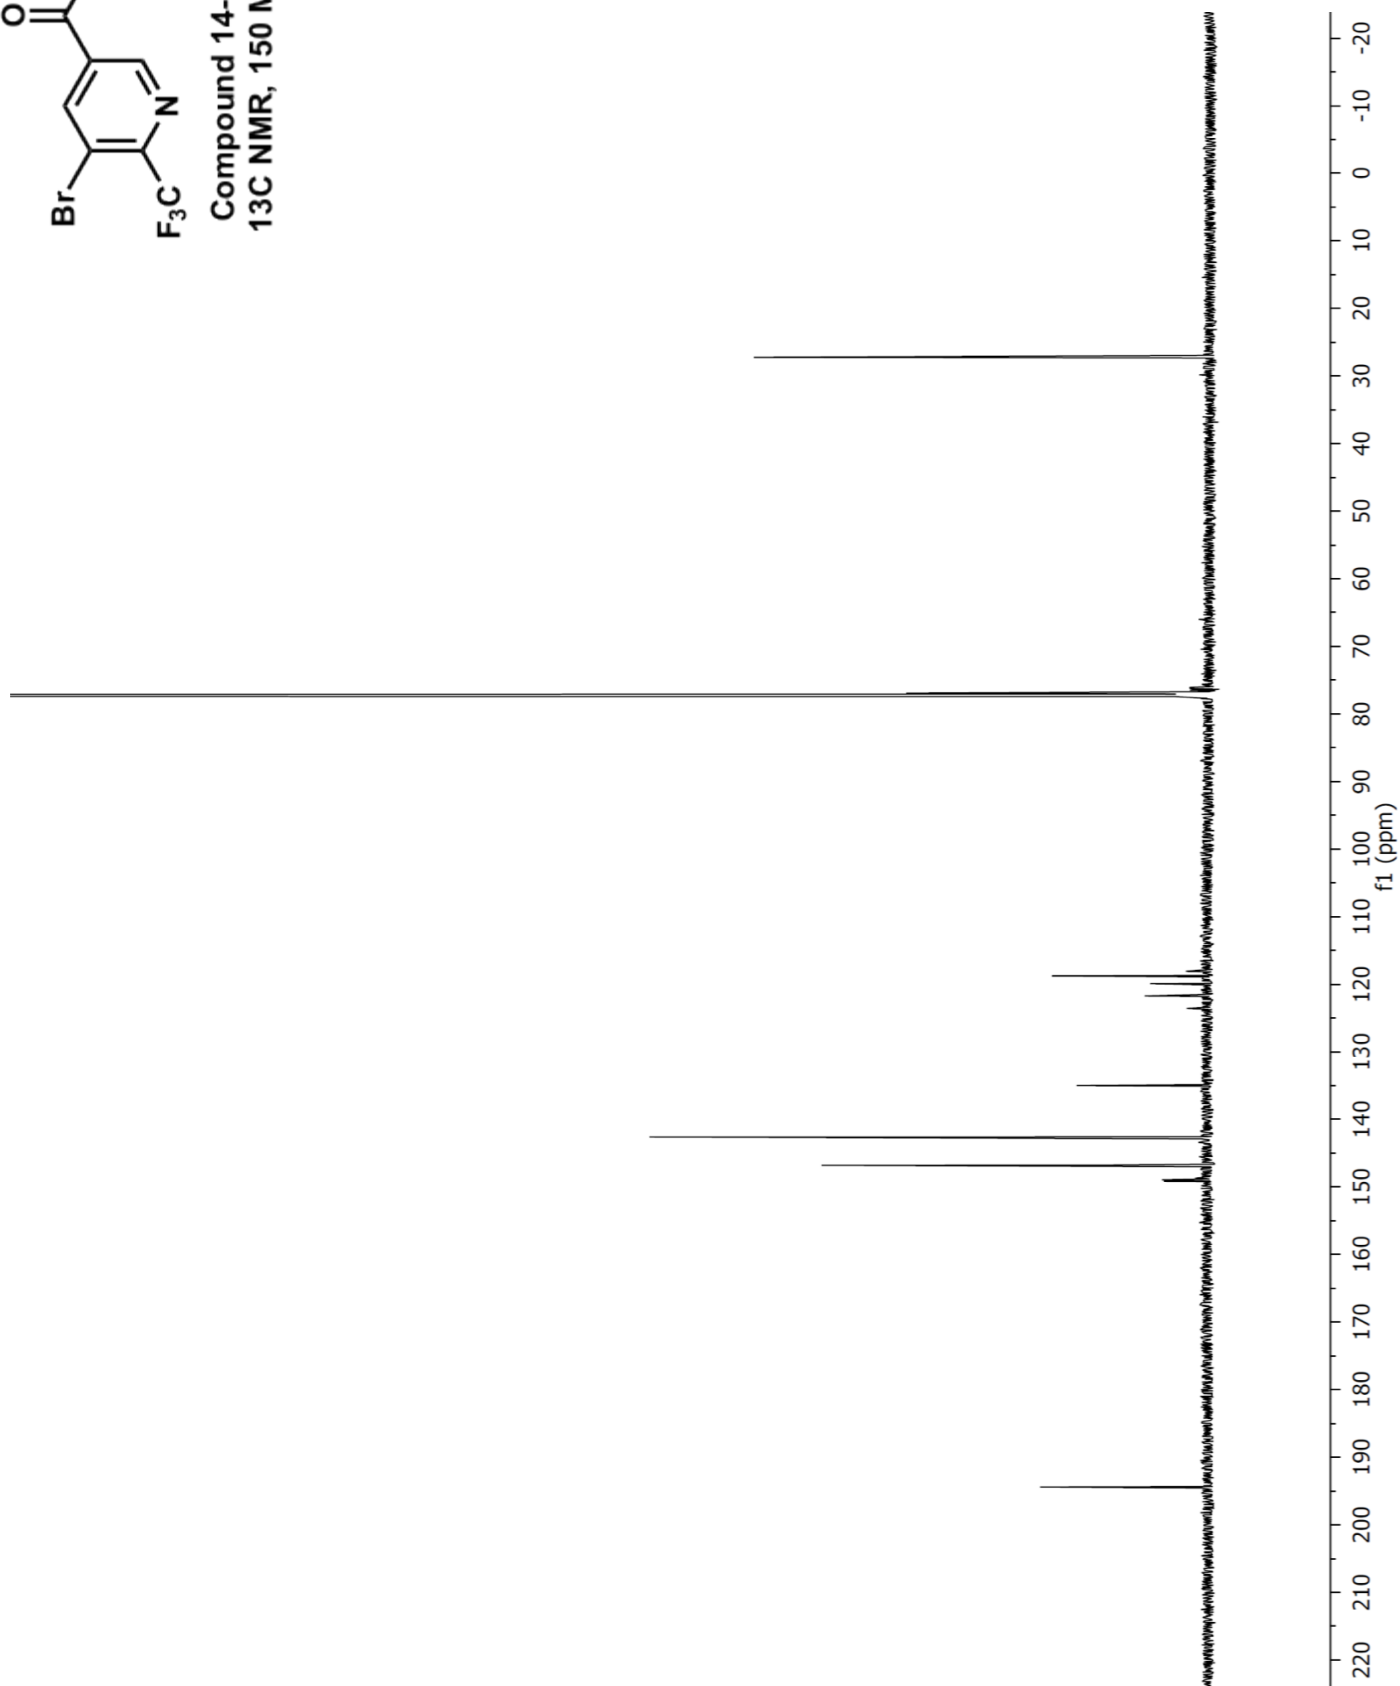

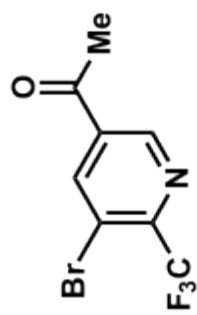

Compound 14-C2  
19F NMR, 376 MHz

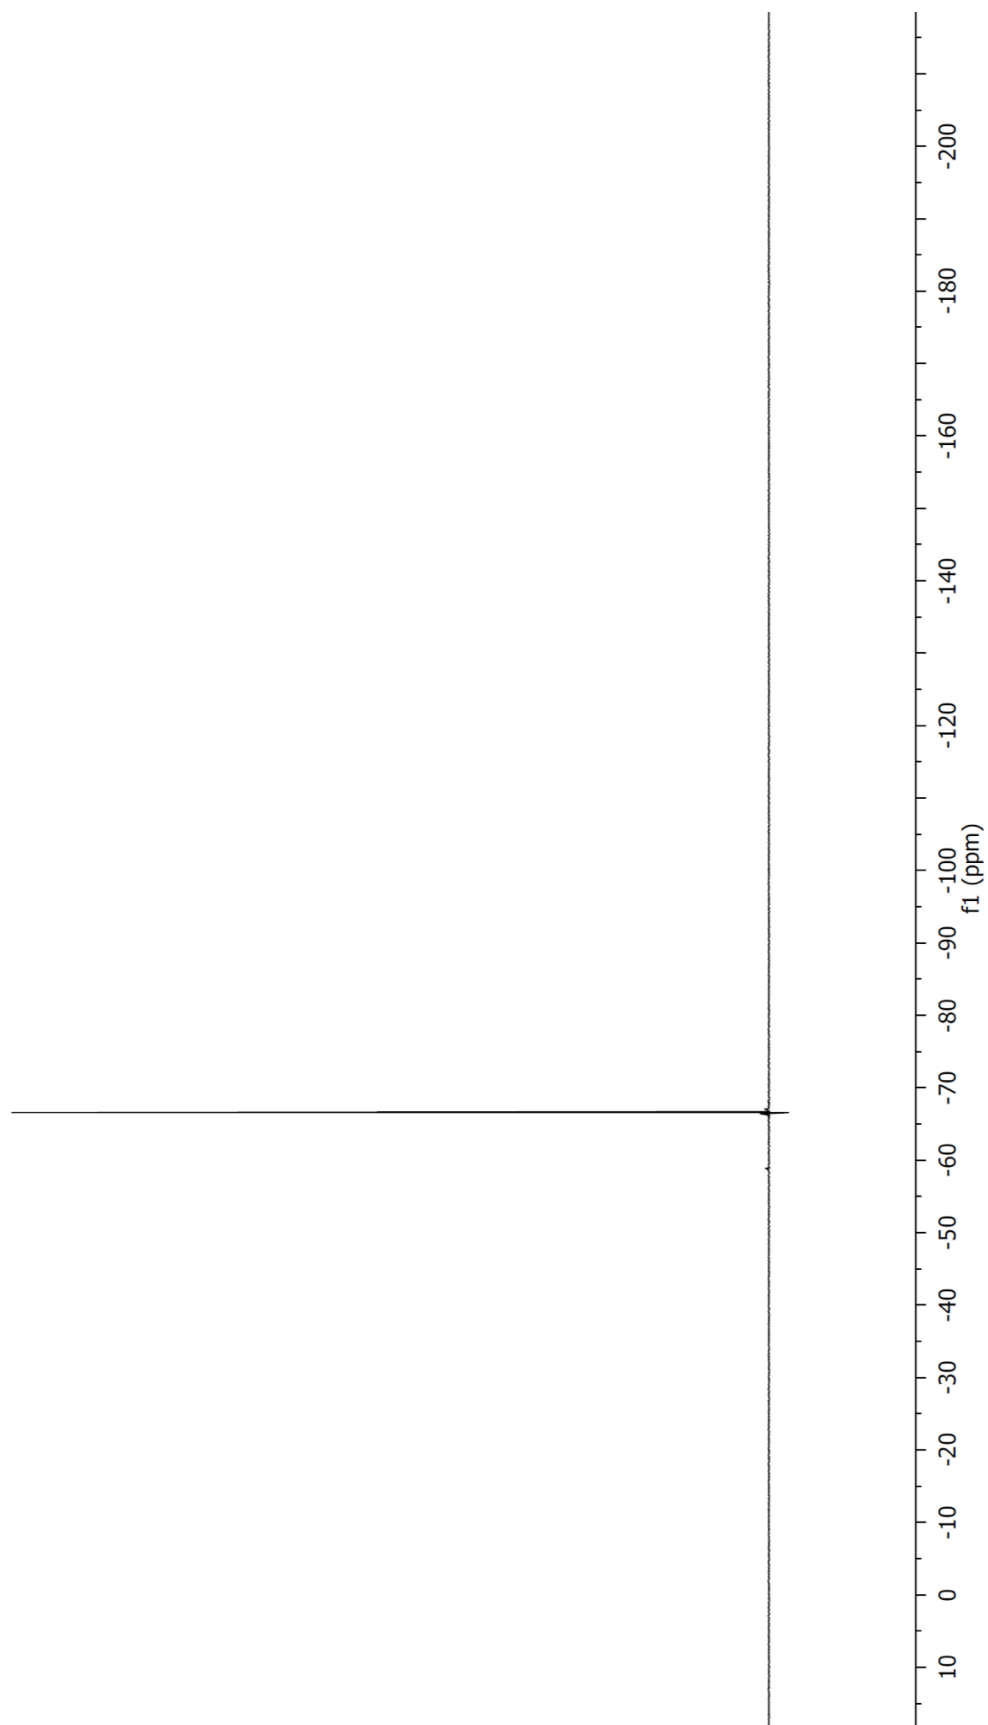

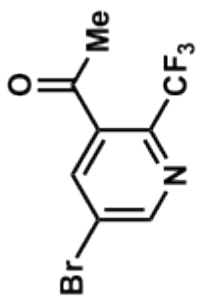

Compound 14-C6  
1H NMR, 400 MHz

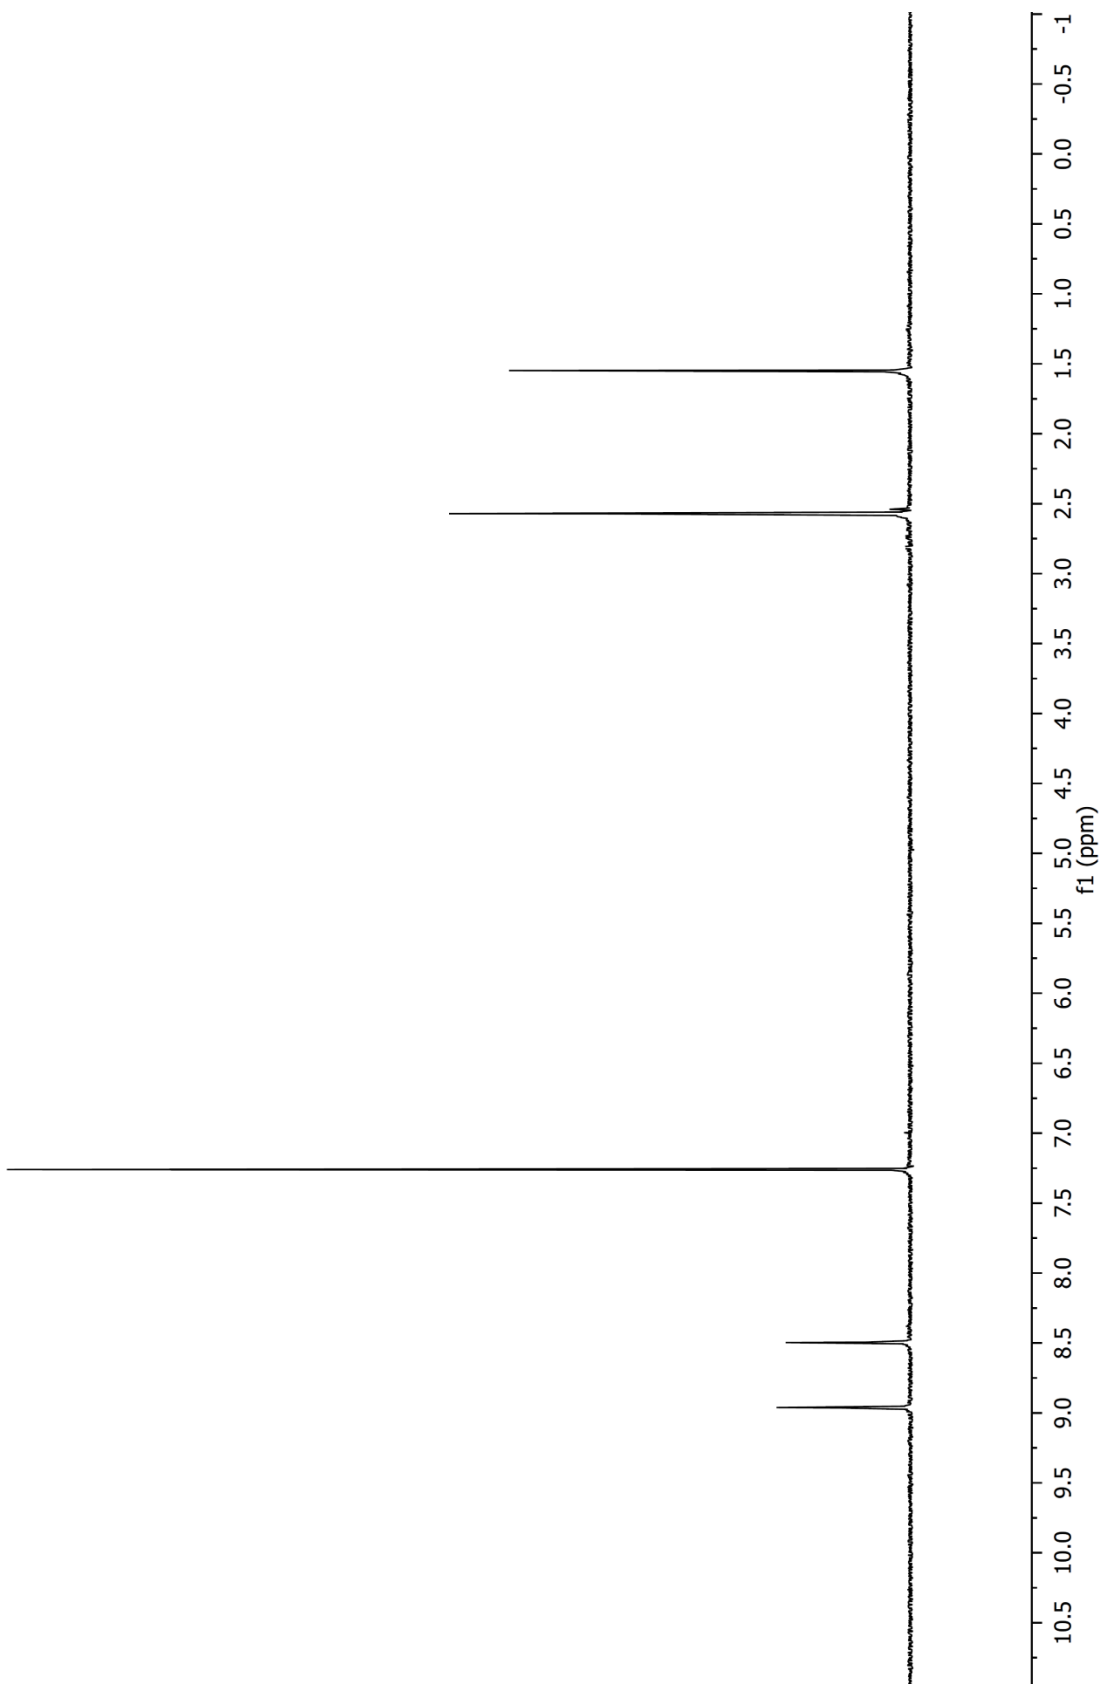



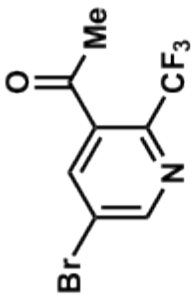

Compound 14-C6  
13C NMR, 150 MHz

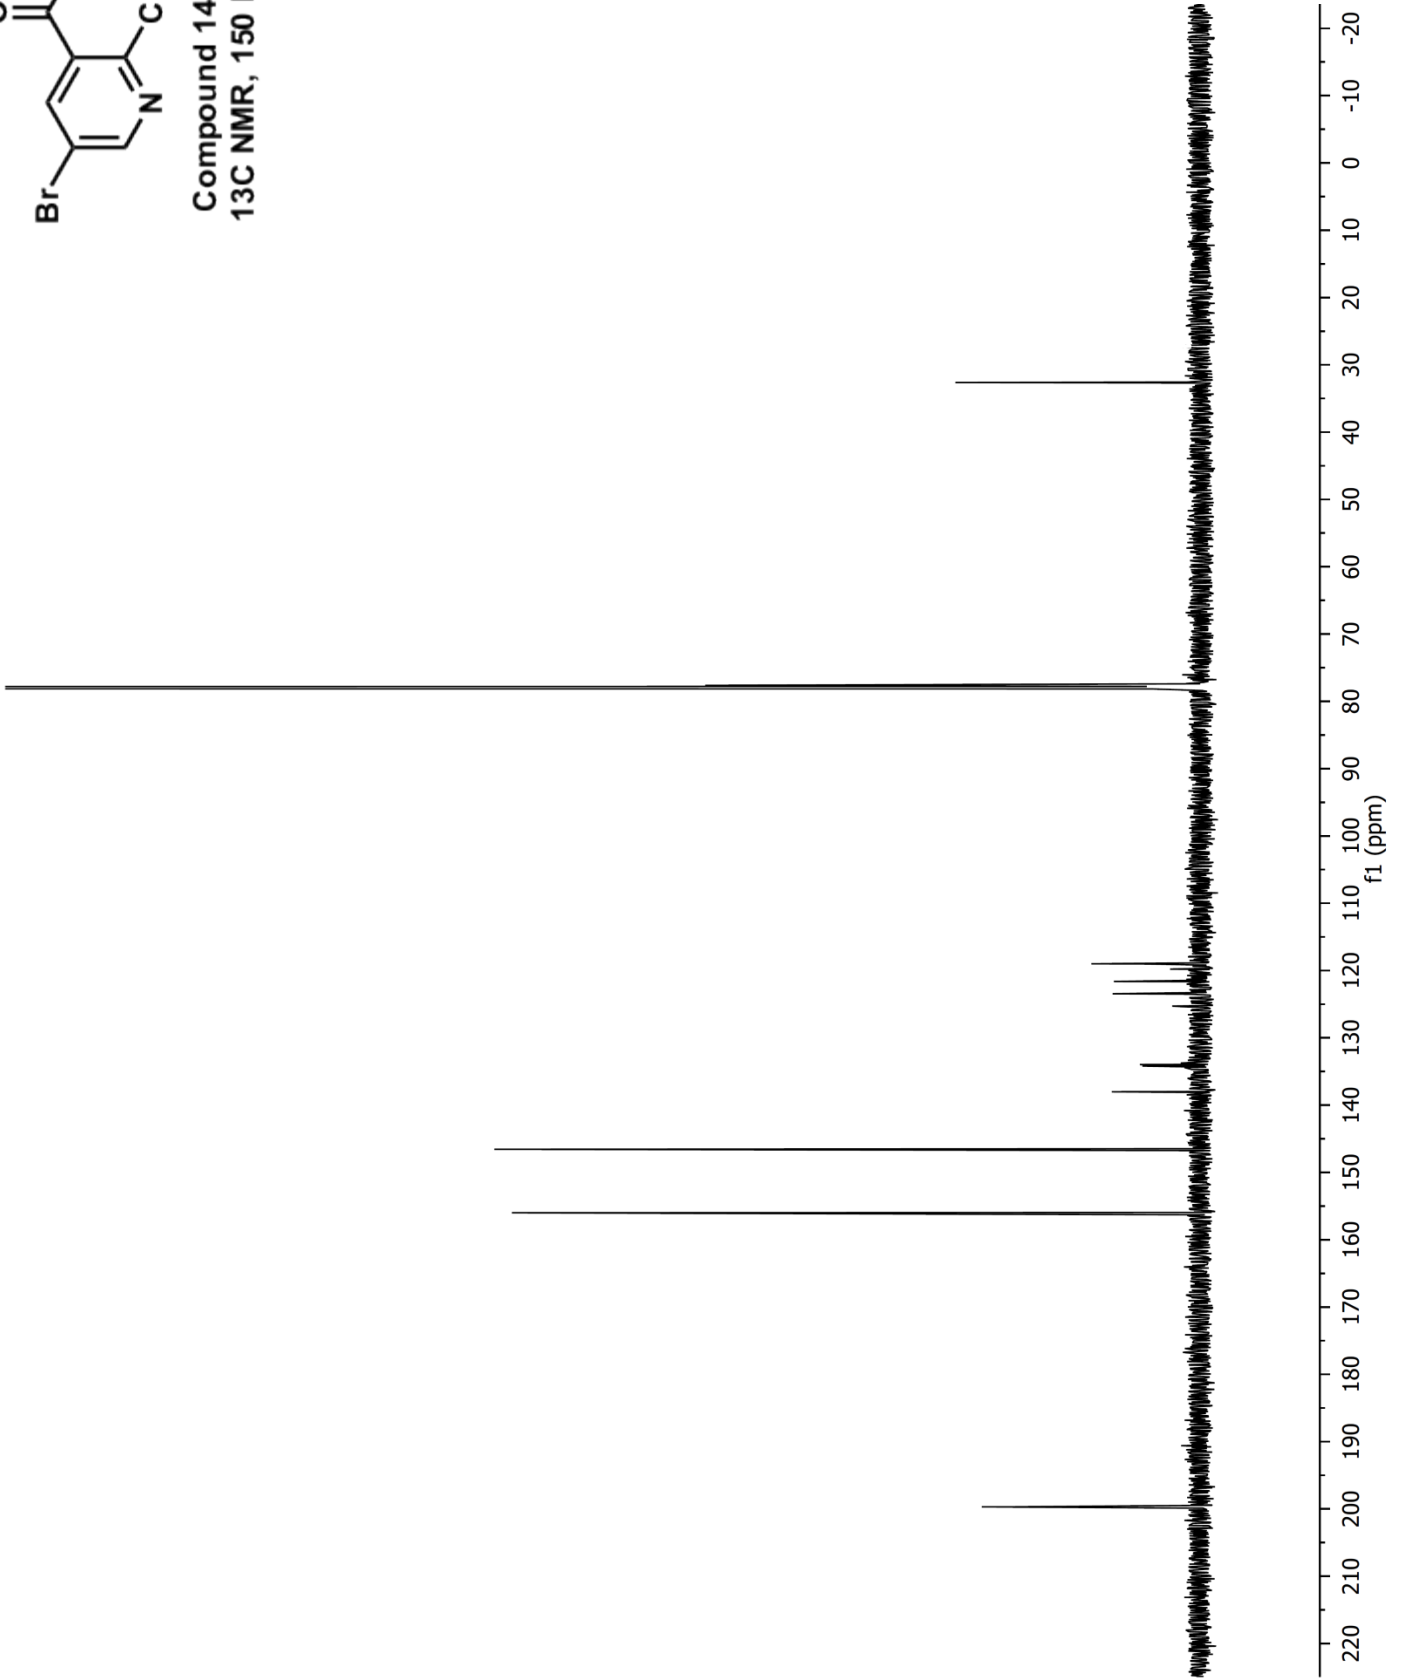

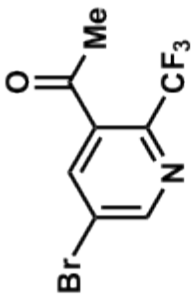

Compound 14-C6  
19F NMR, 376 MHz

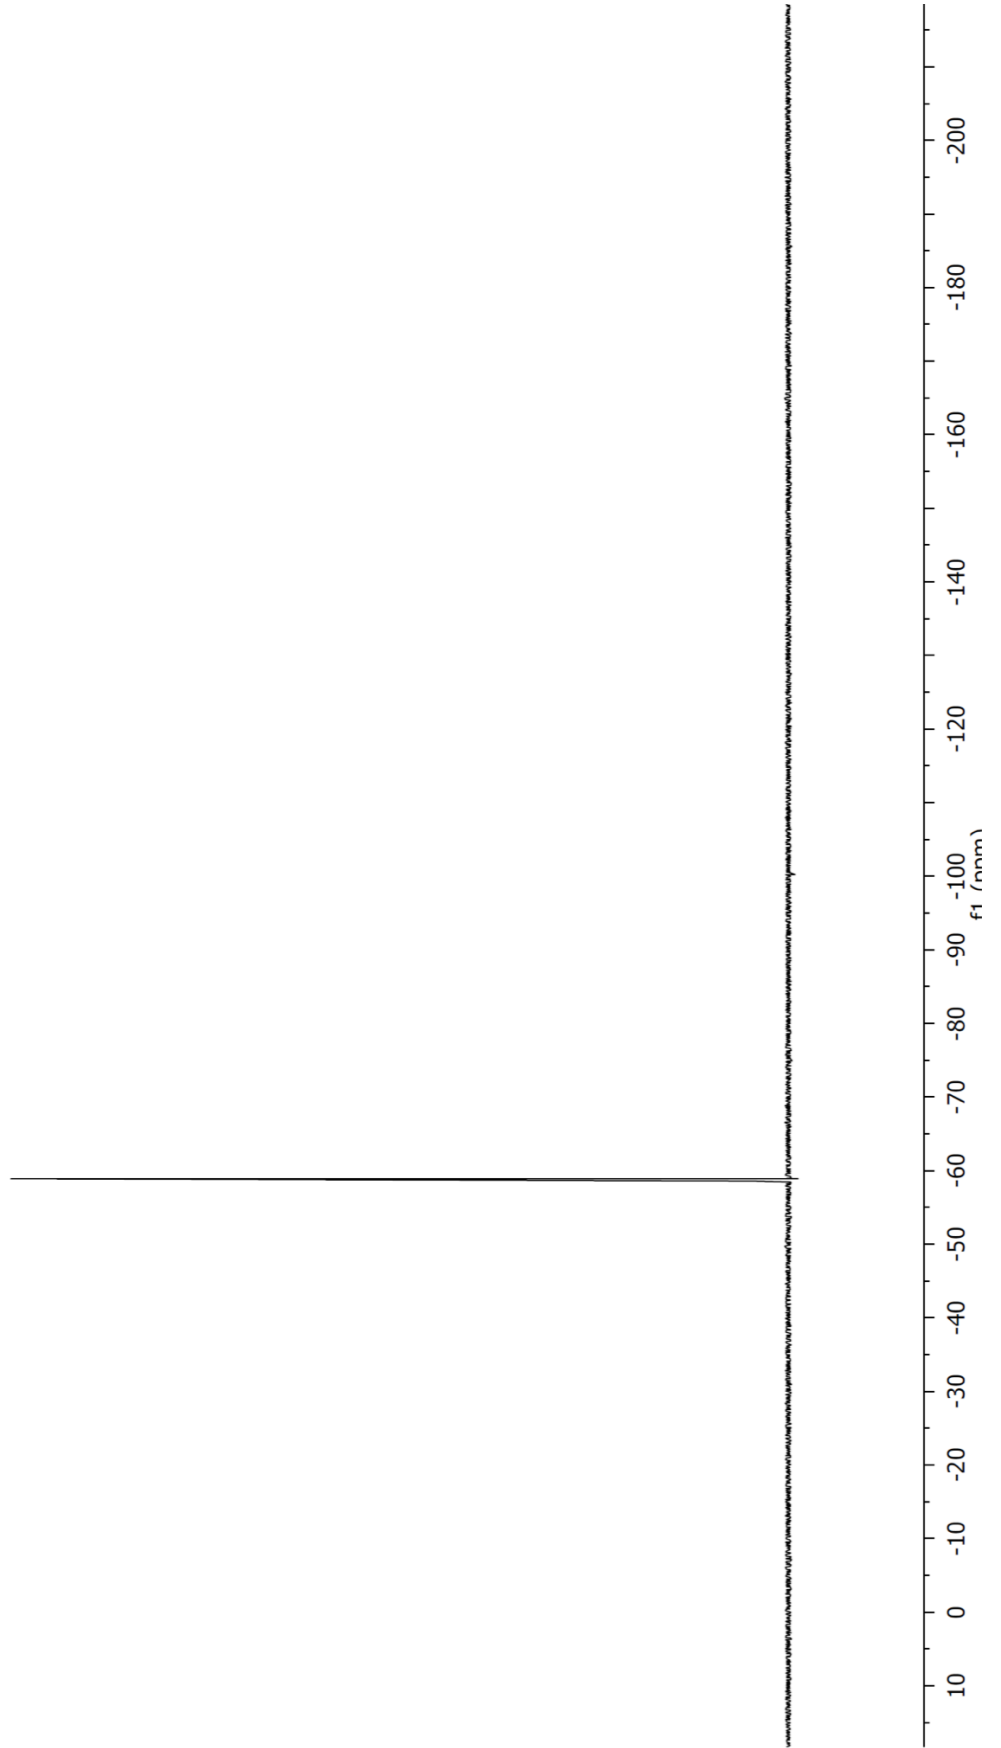

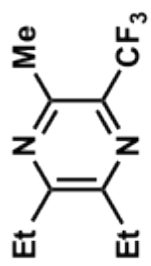

Compound 15  
1H NMR, 400 MHz

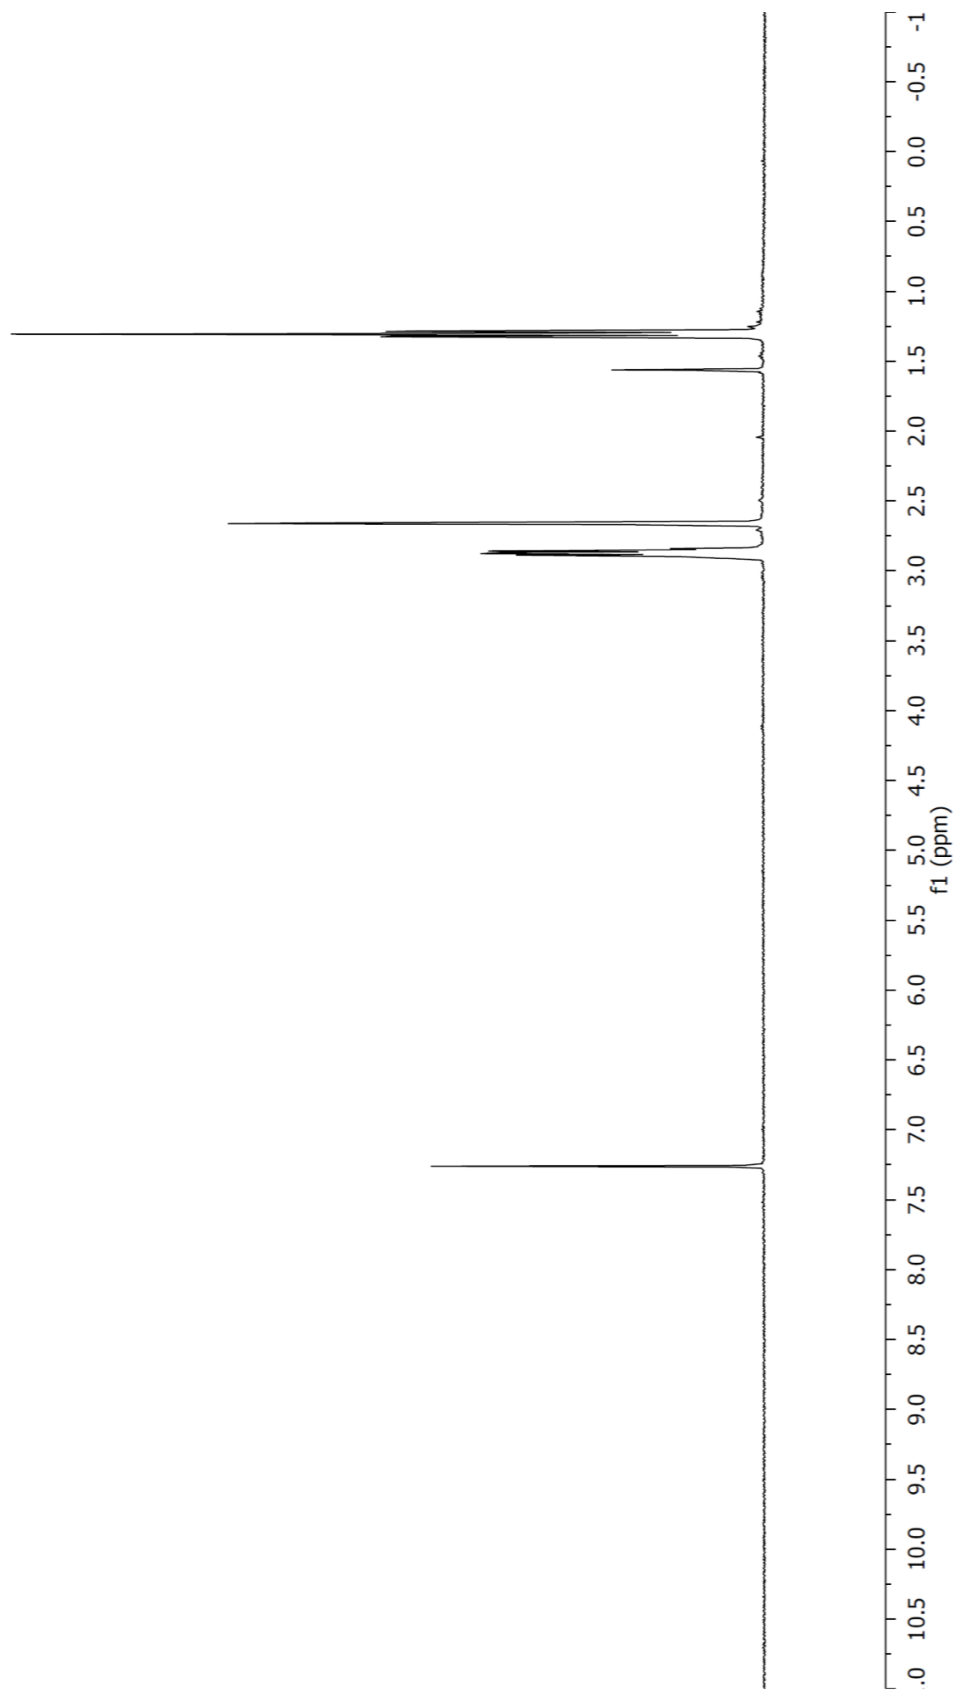

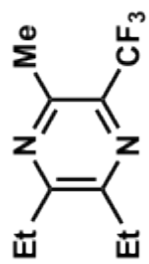

Compound 15  
13C NMR, 150 MHz

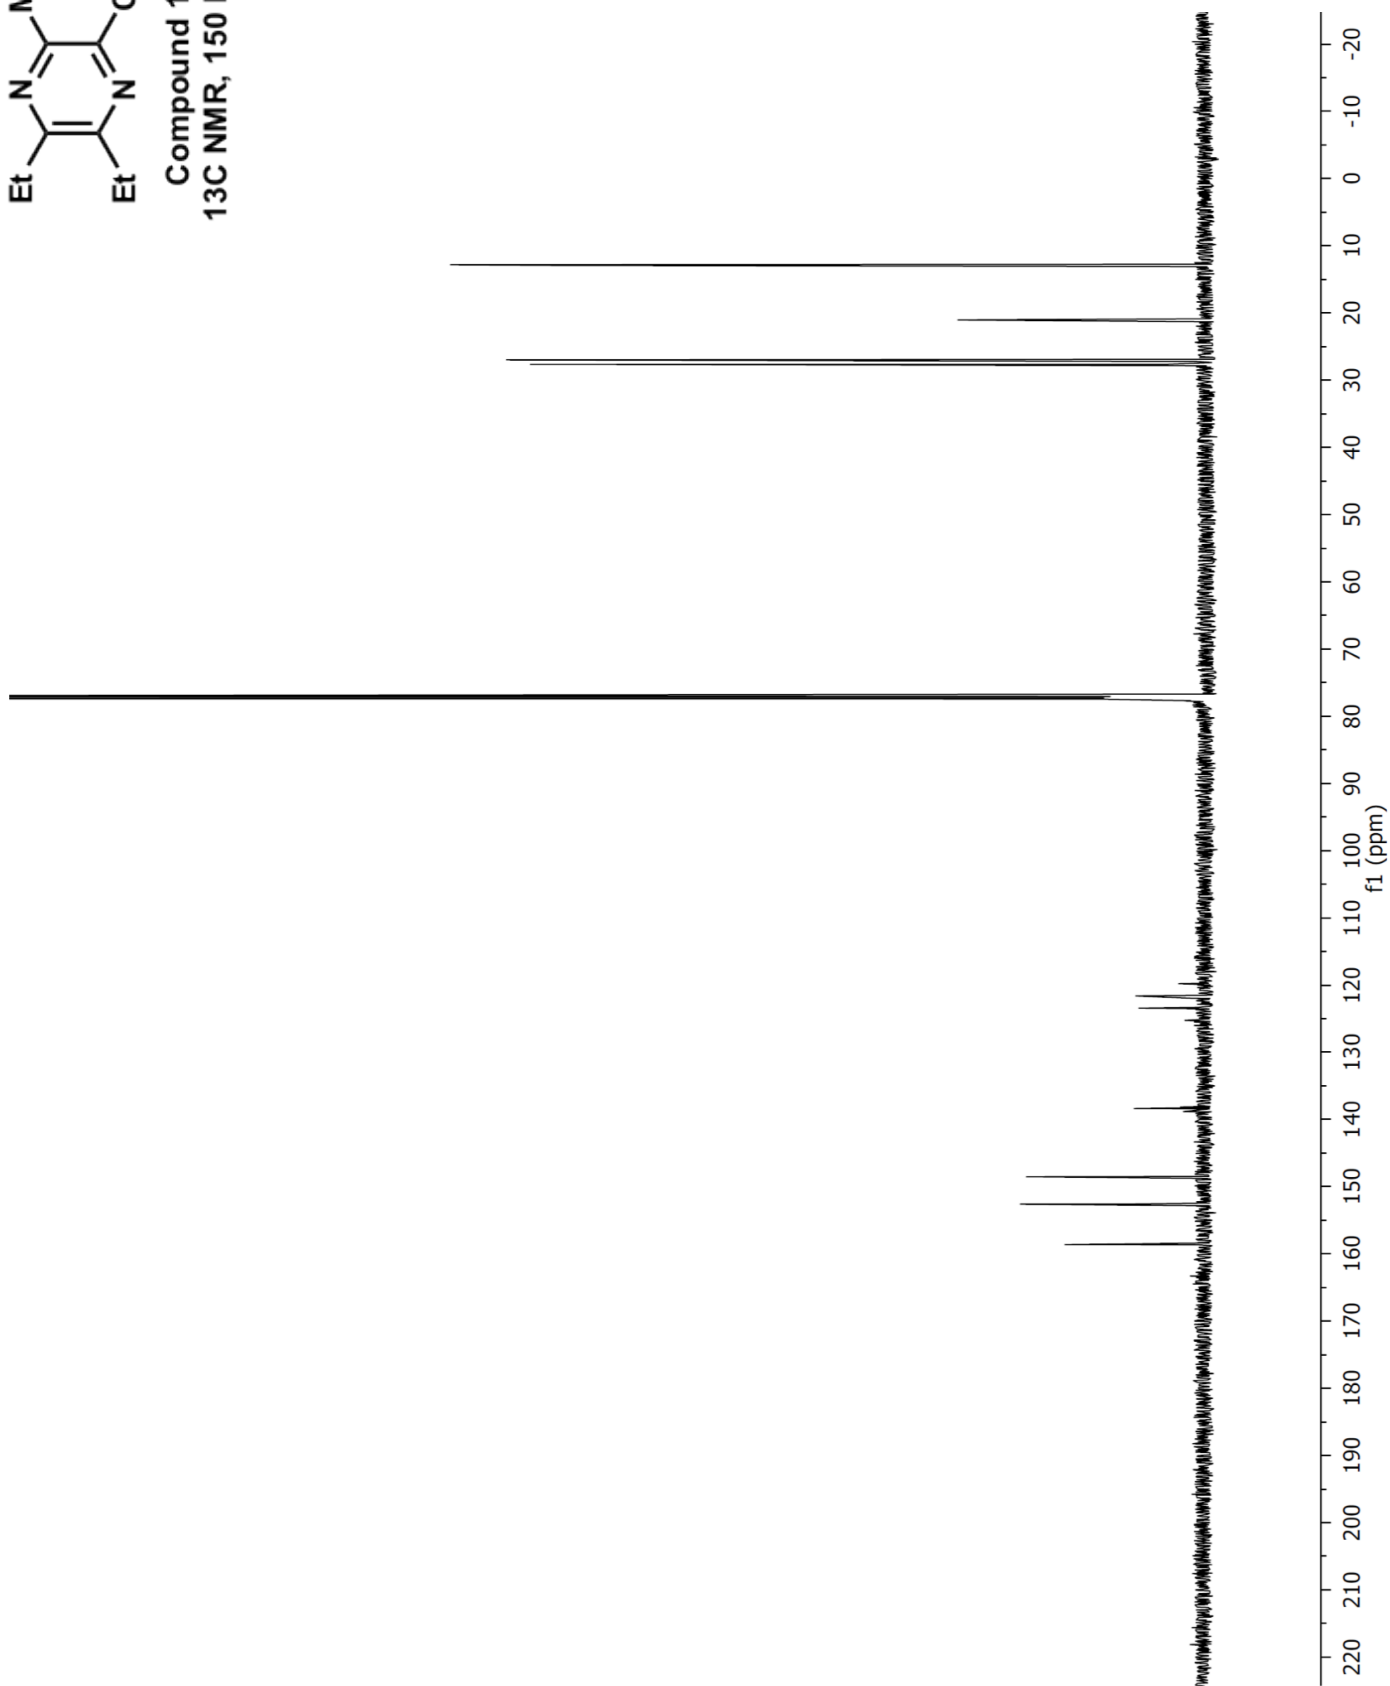

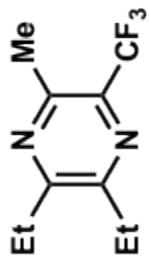

Compound 15  
19F NMR, 376 MHz

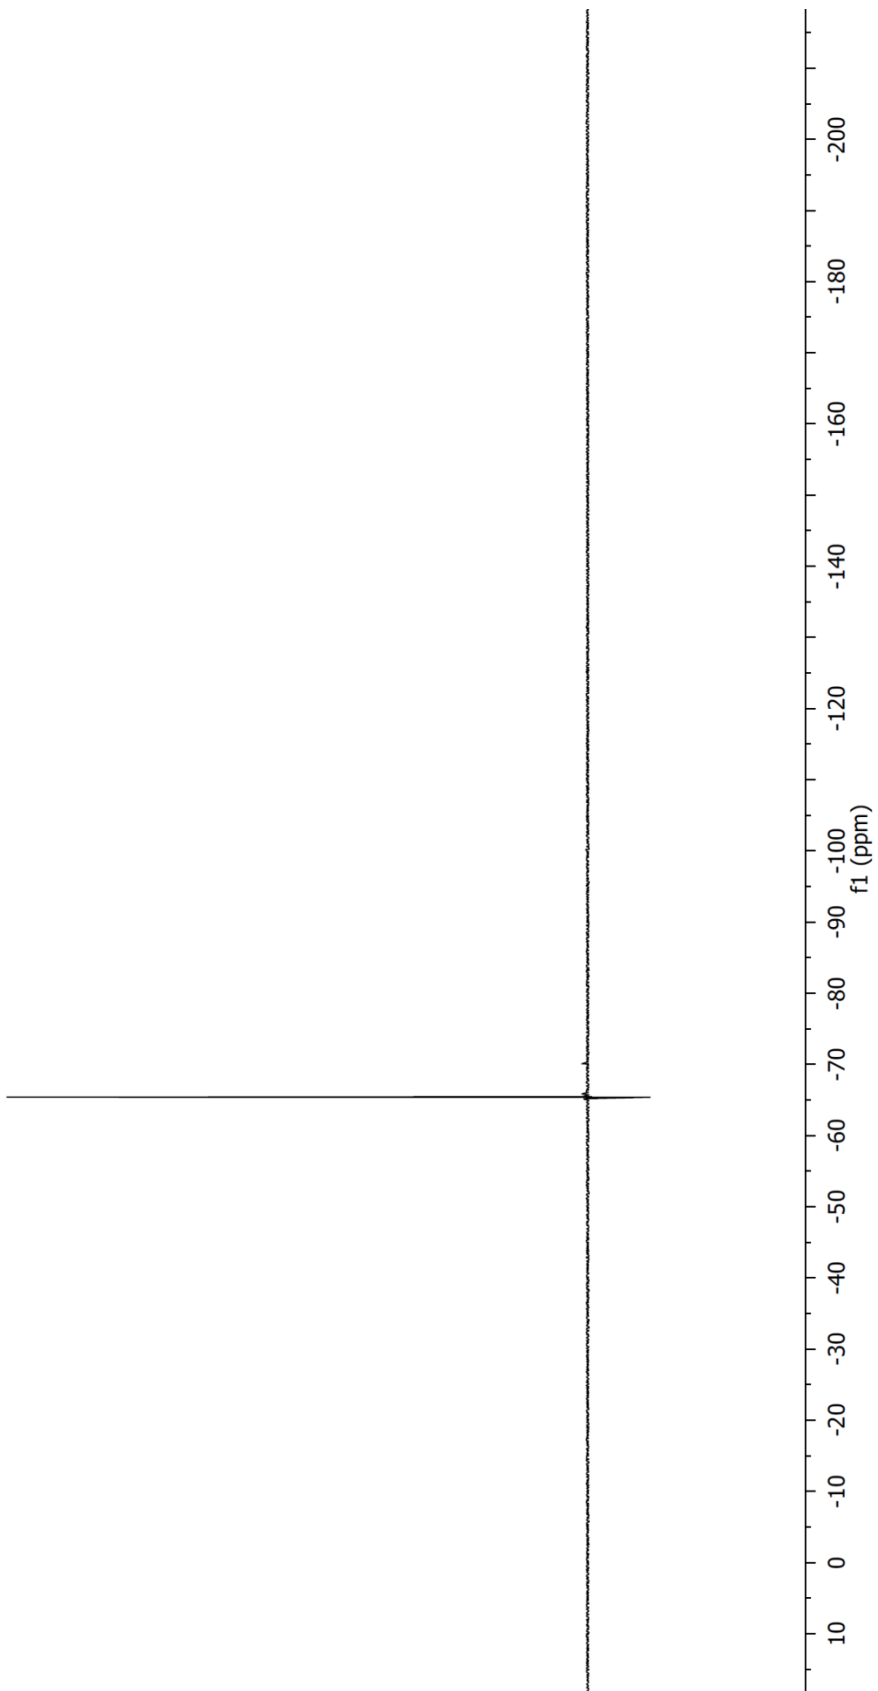

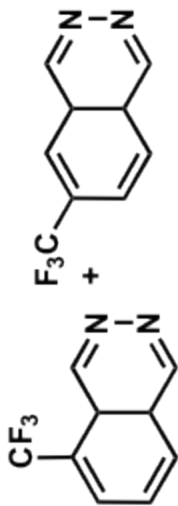

Compound 16-C4 and 16-C5  
<sup>1</sup>H NMR, 400 MHz

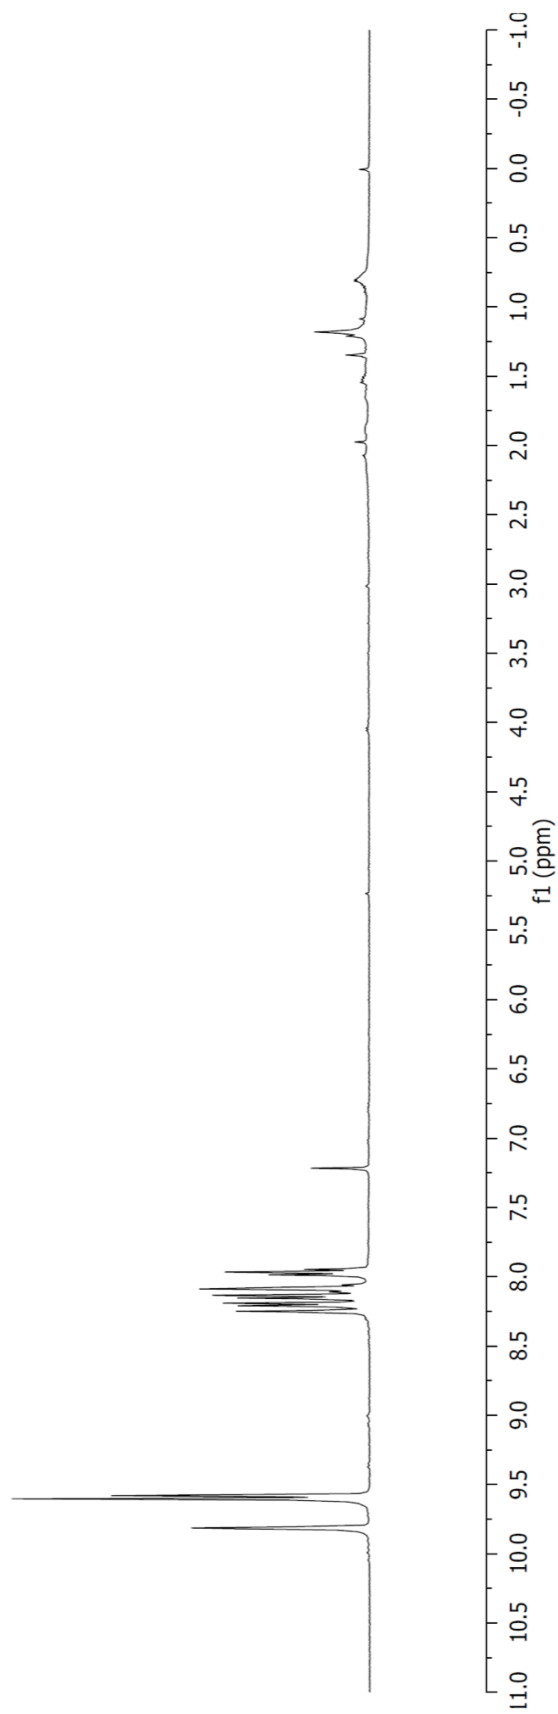

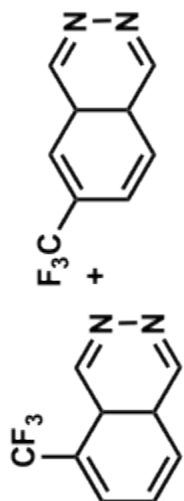

Compound 16-C4 and 16-C5  
13C NMR, 150 MHz

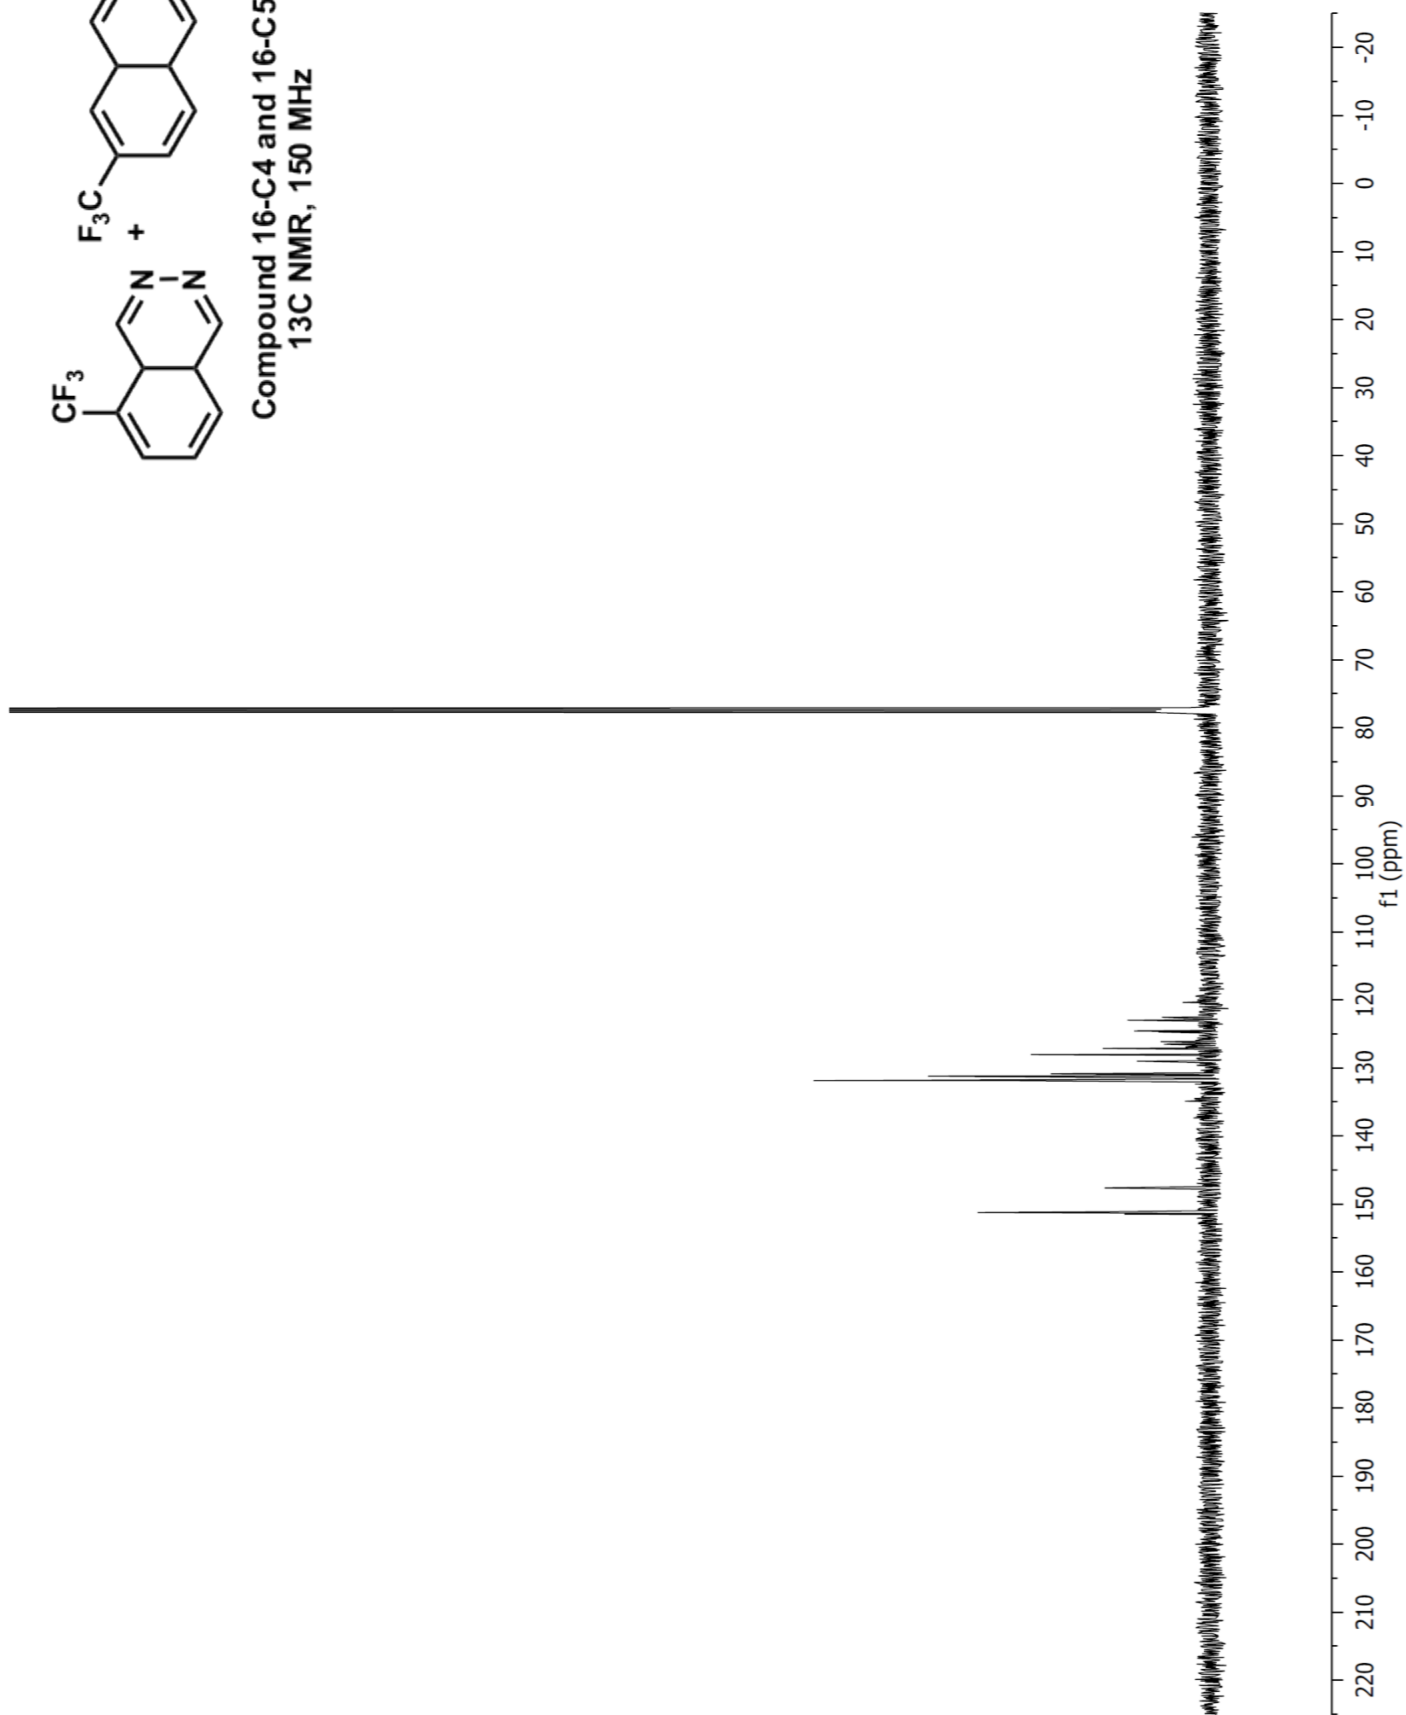

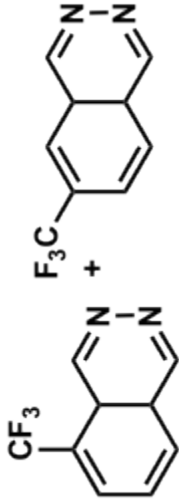

Compound 16-C4 and 16-C5  
19F NMR, 376 MHz

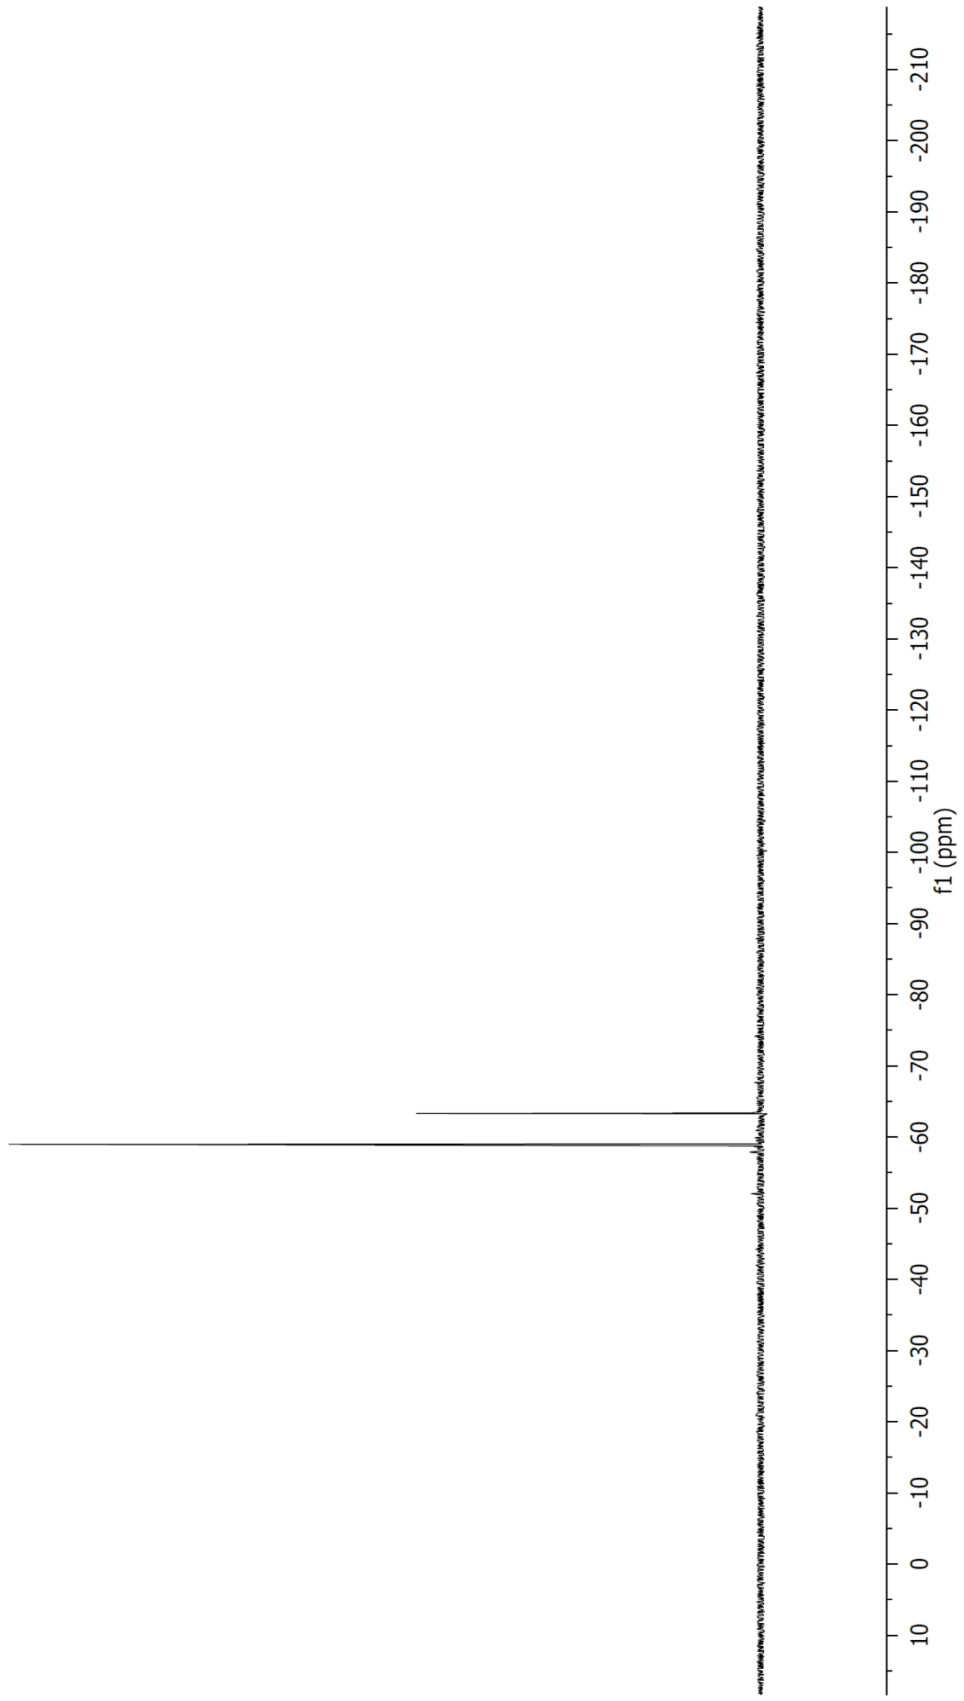



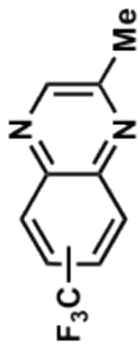

Compound 17  
1H NMR, 400 MHz

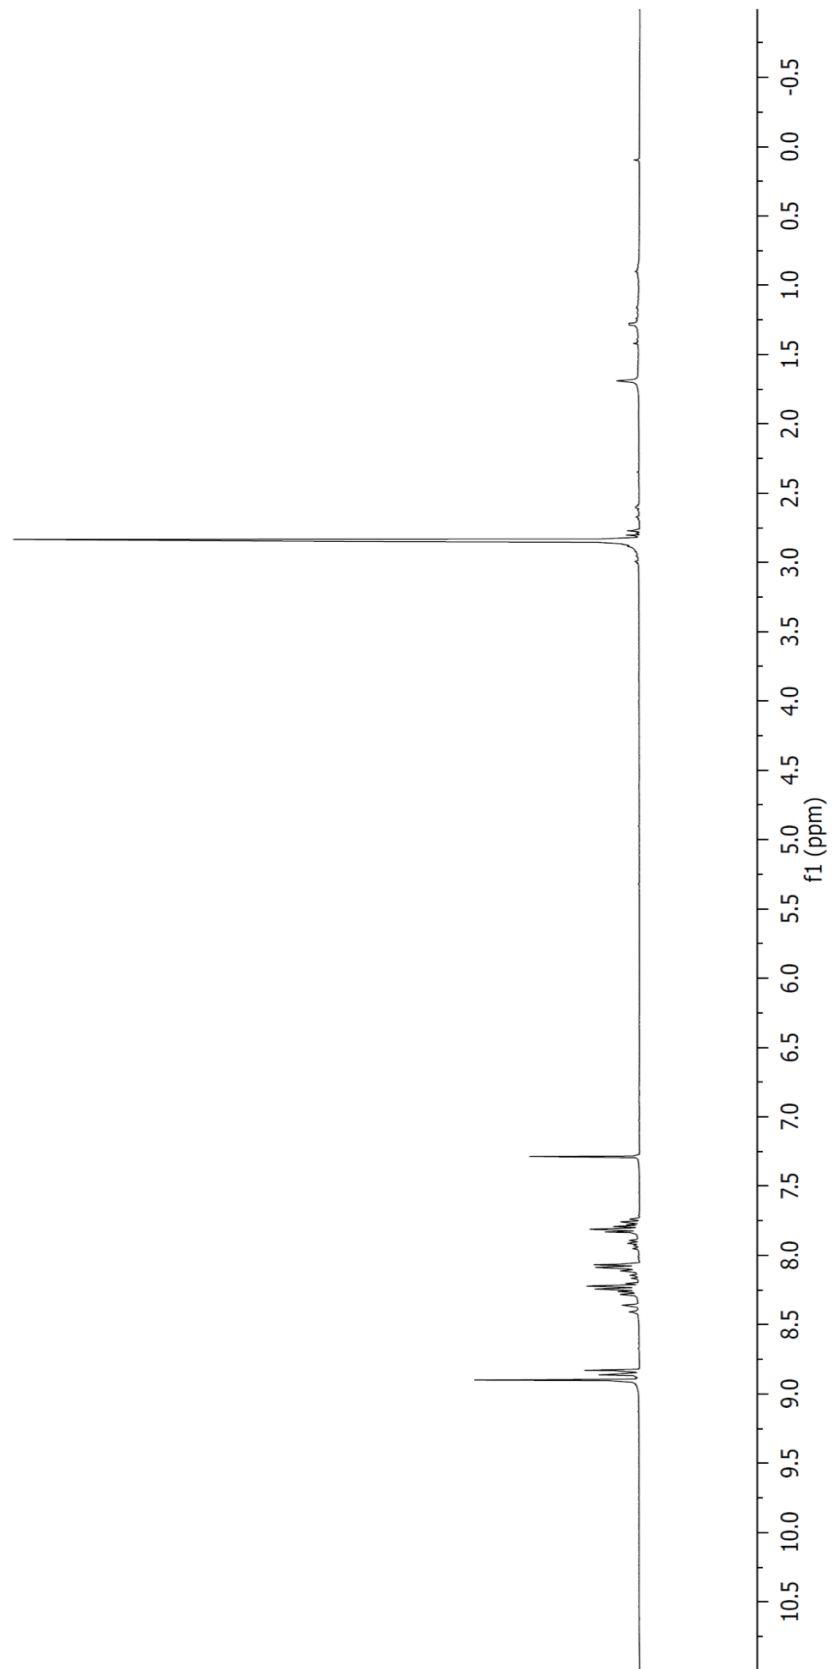

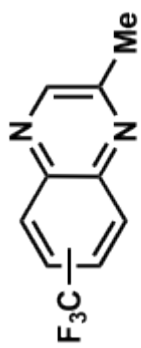

Compound 17  
13C NMR, 150 MHz

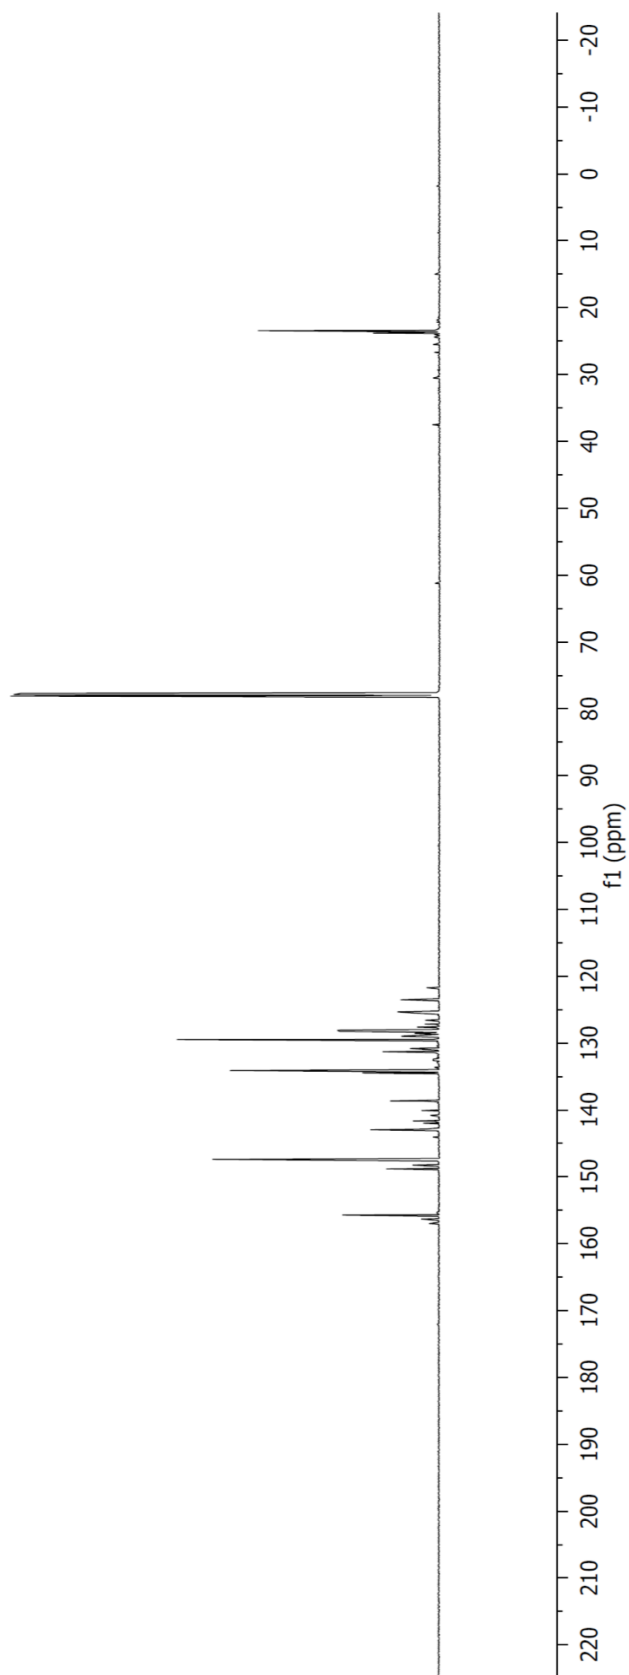

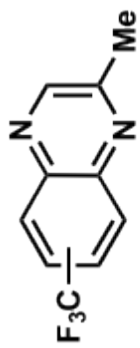

Compound 17  
19F NMR, 376 MHz

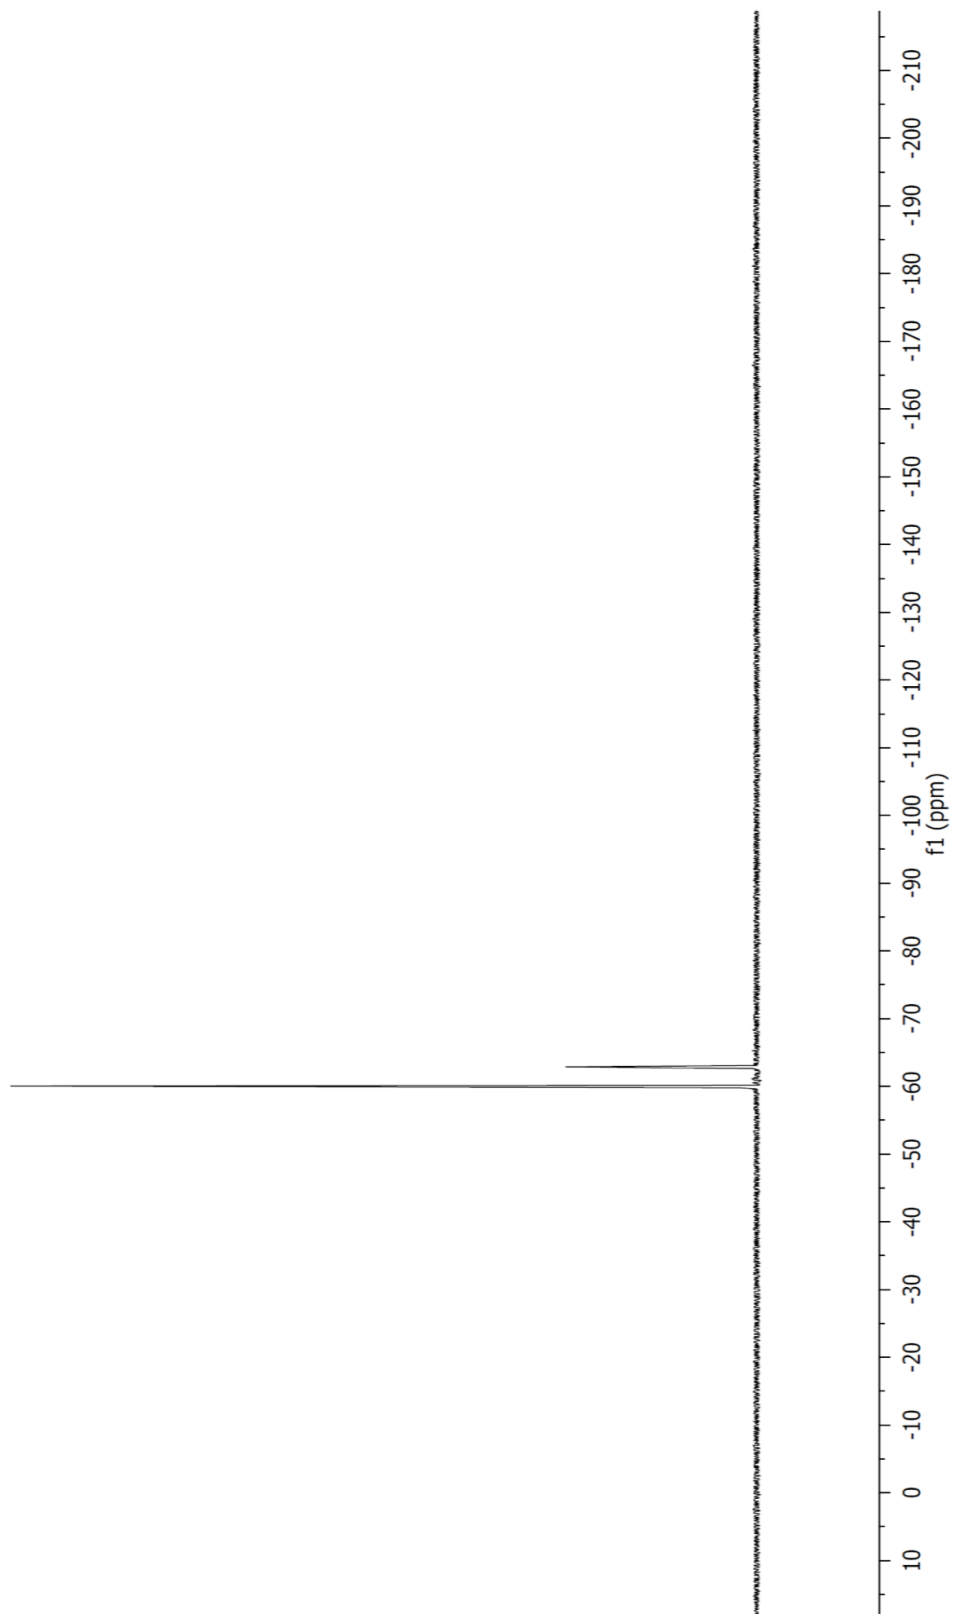

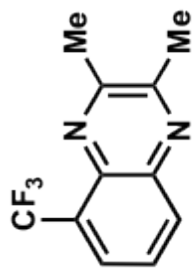

Compound 18-C5  
1H NMR, 400 MHz

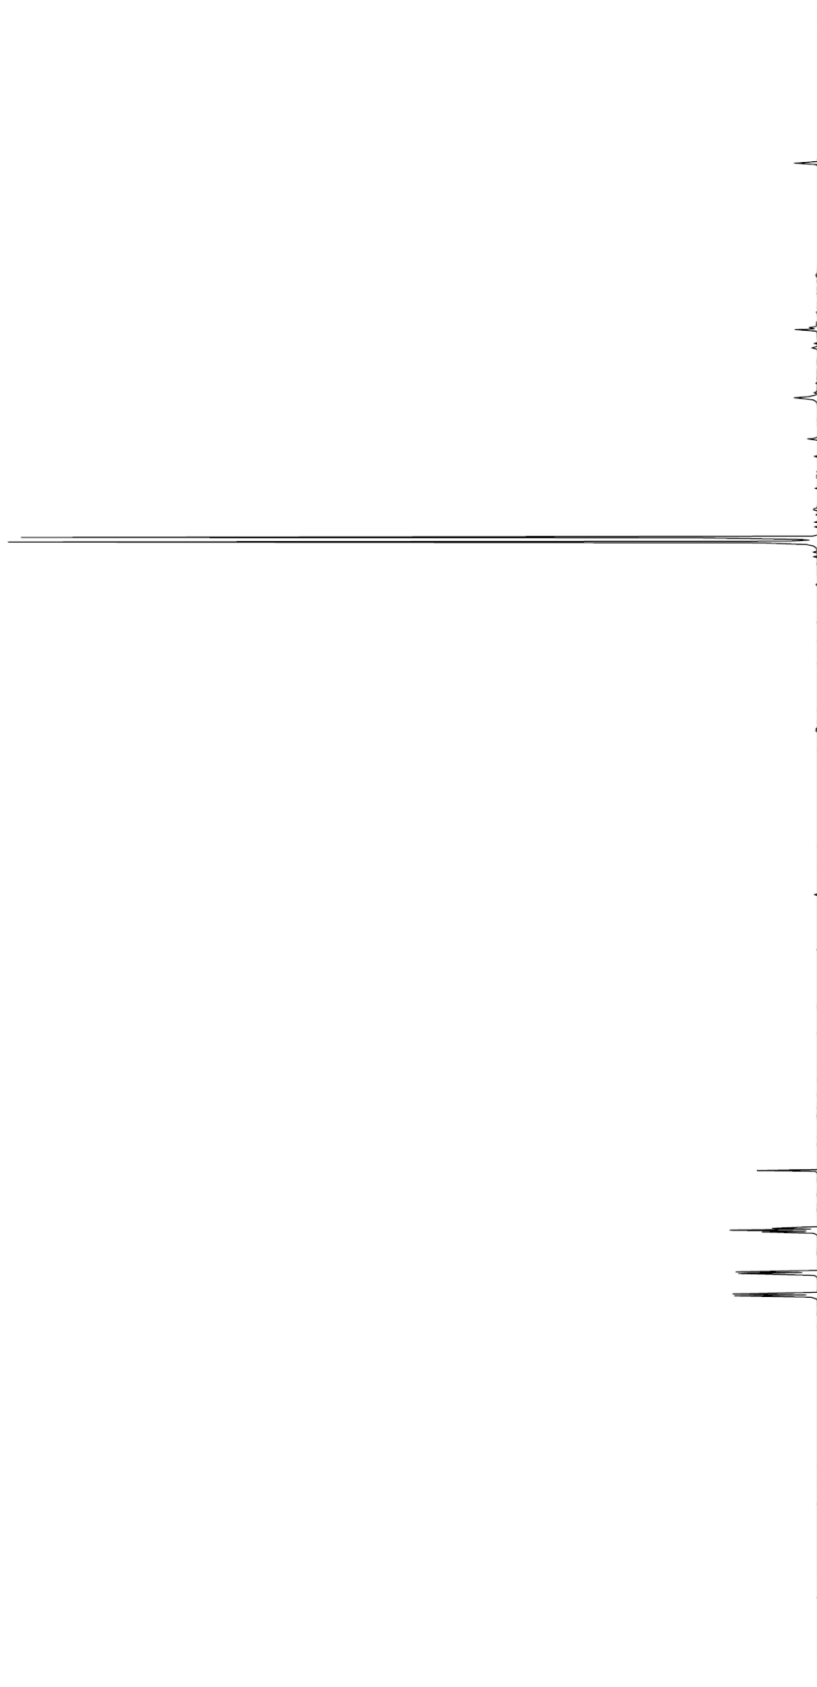

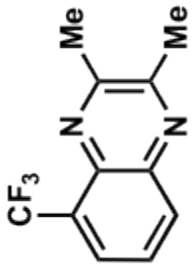

Compound 18-C5  
13C NMR, 150 MHz

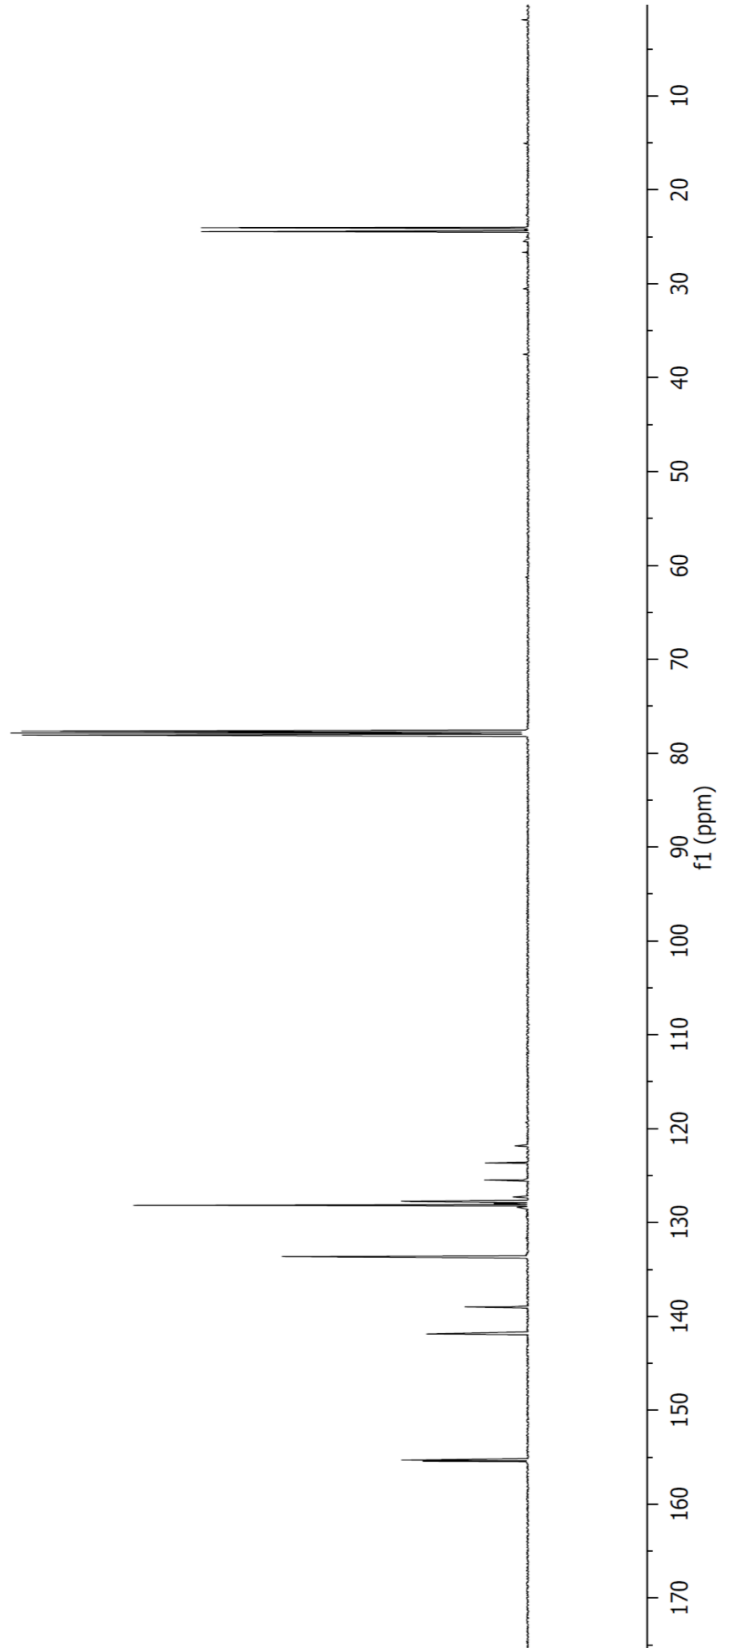

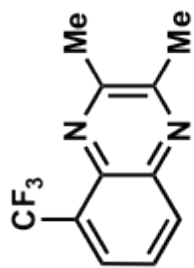

Compound 18-C5  
19F NMR, 376 MHz

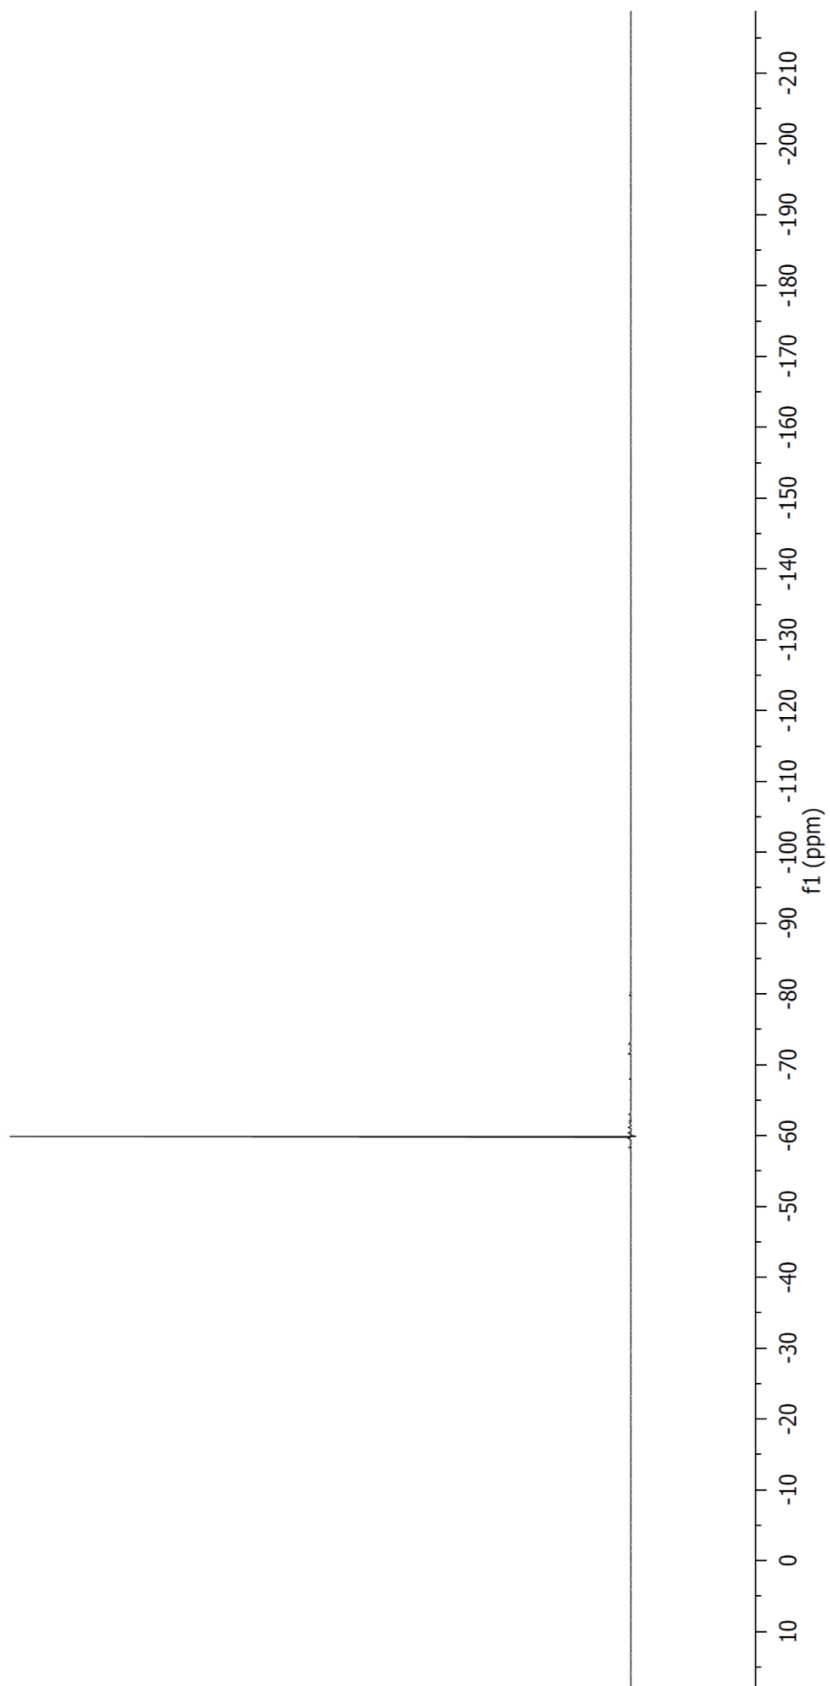

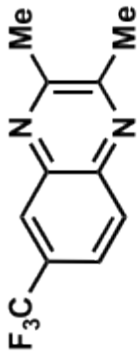

Compound 18-C6  
1H NMR, 400 MHz

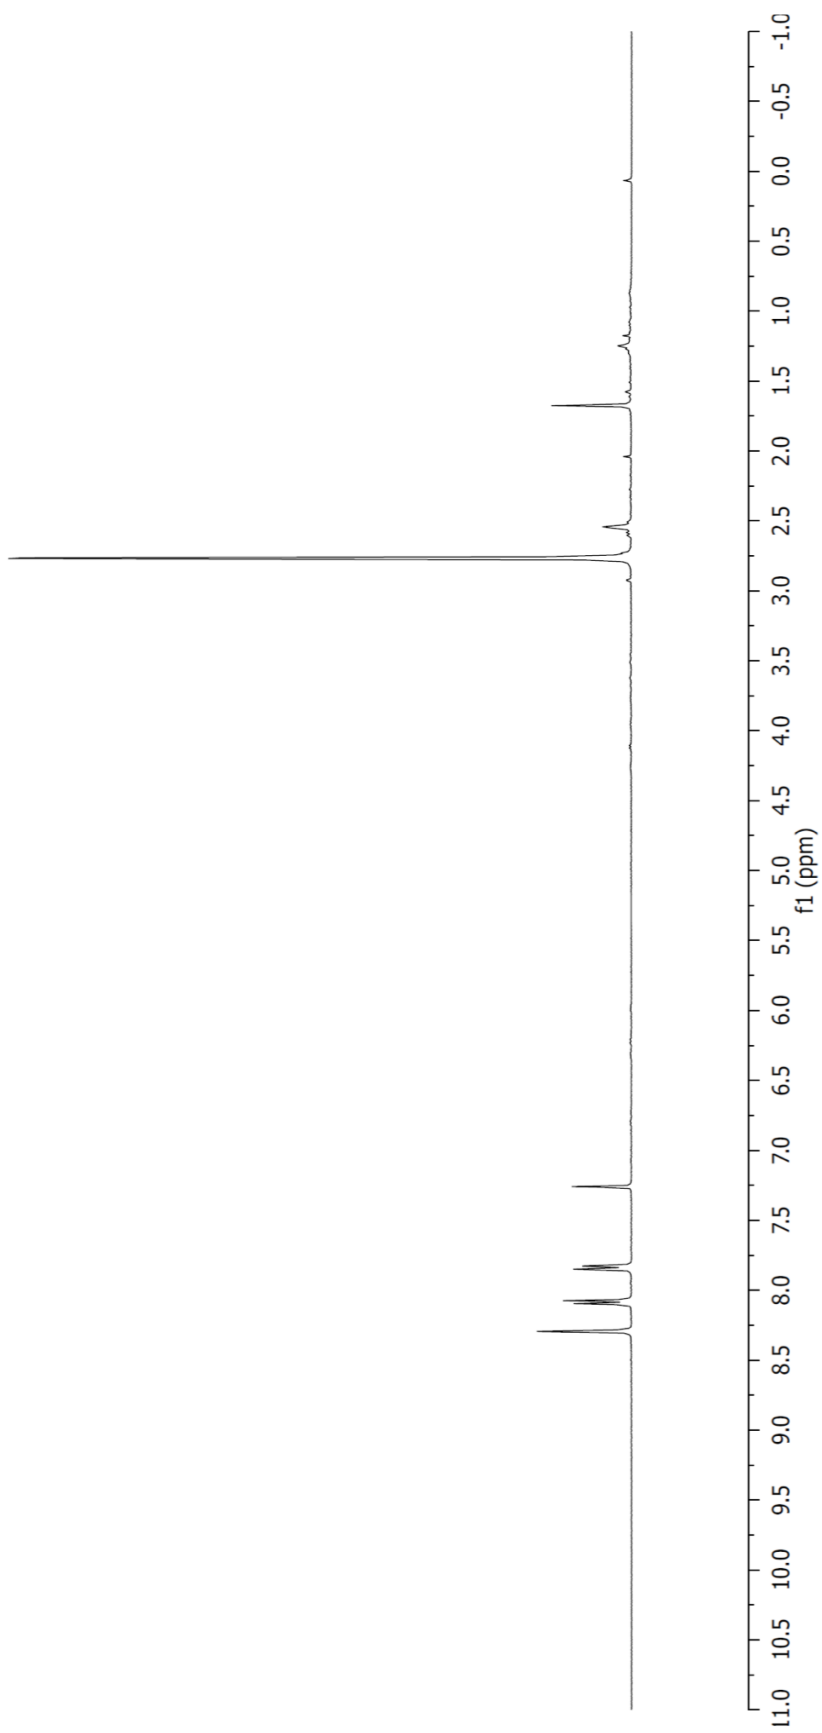

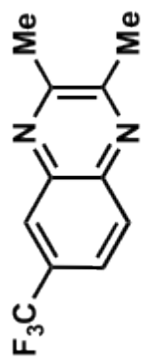

Compound 18-C6  
13C NMR, 150 MHz

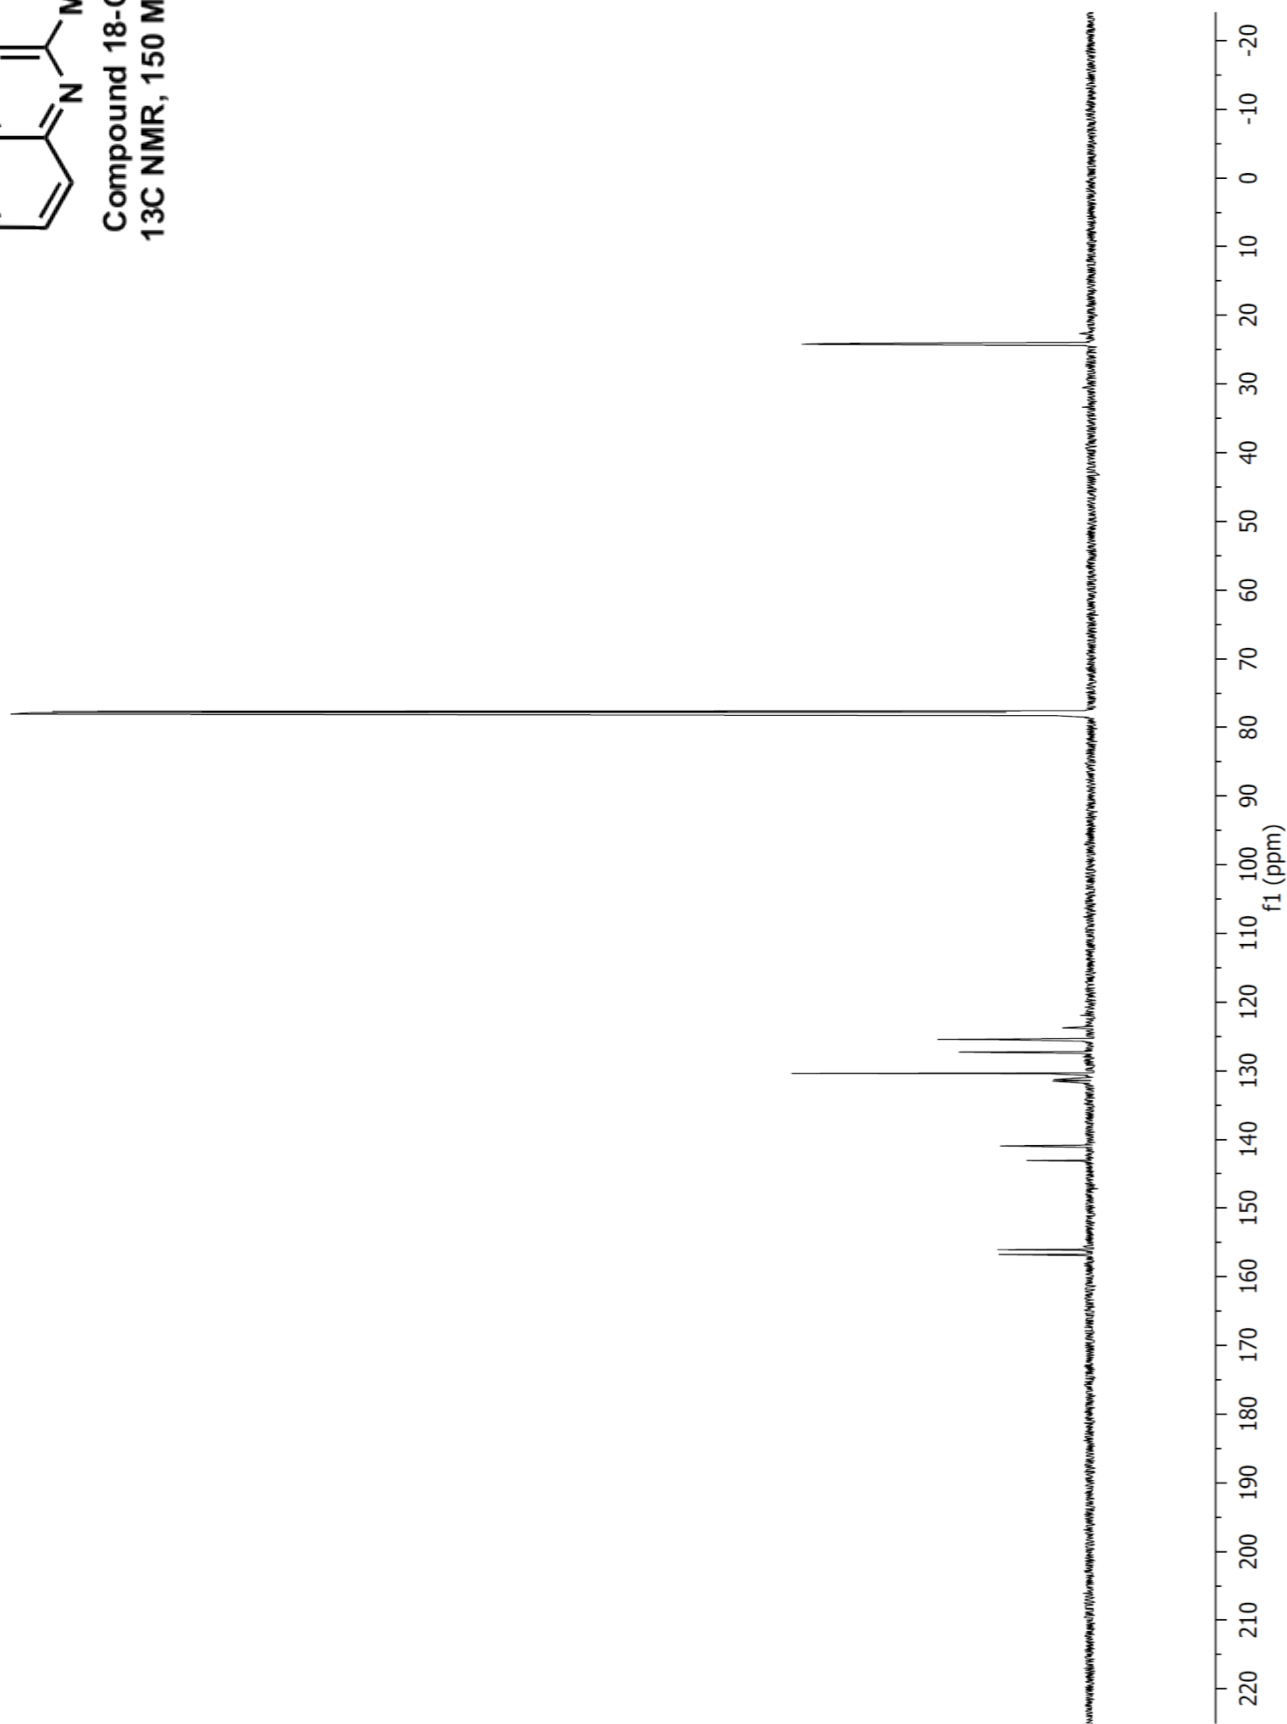



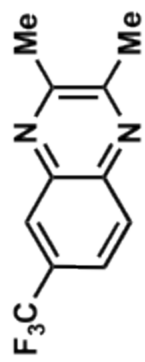

Compound 18-C6  
19F NMR, 376 MHz

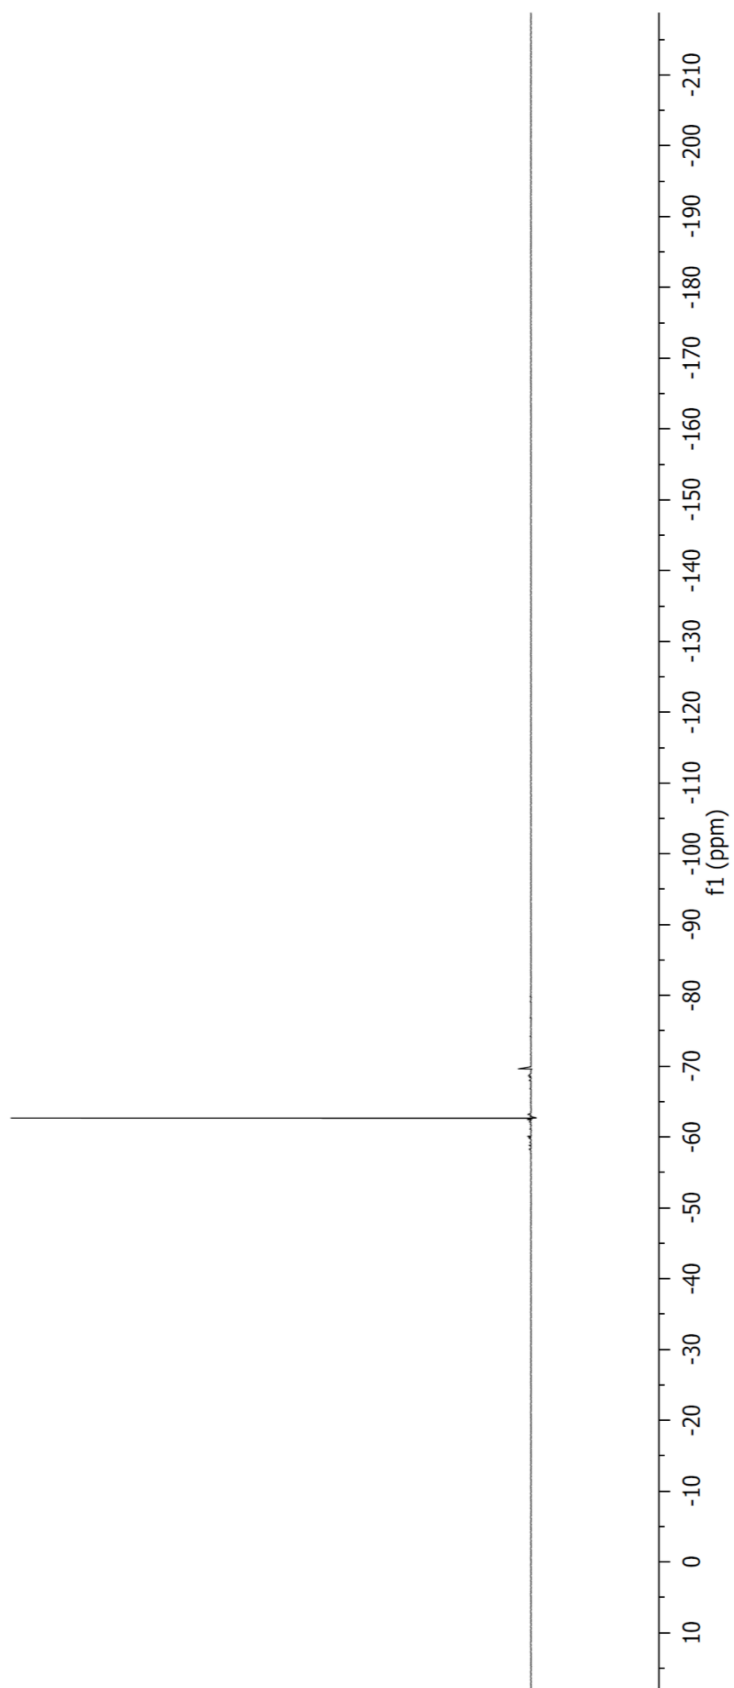

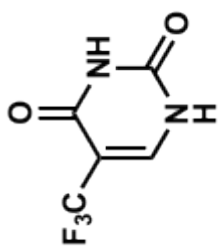

Compound 19  
1H NMR, 400 MHz

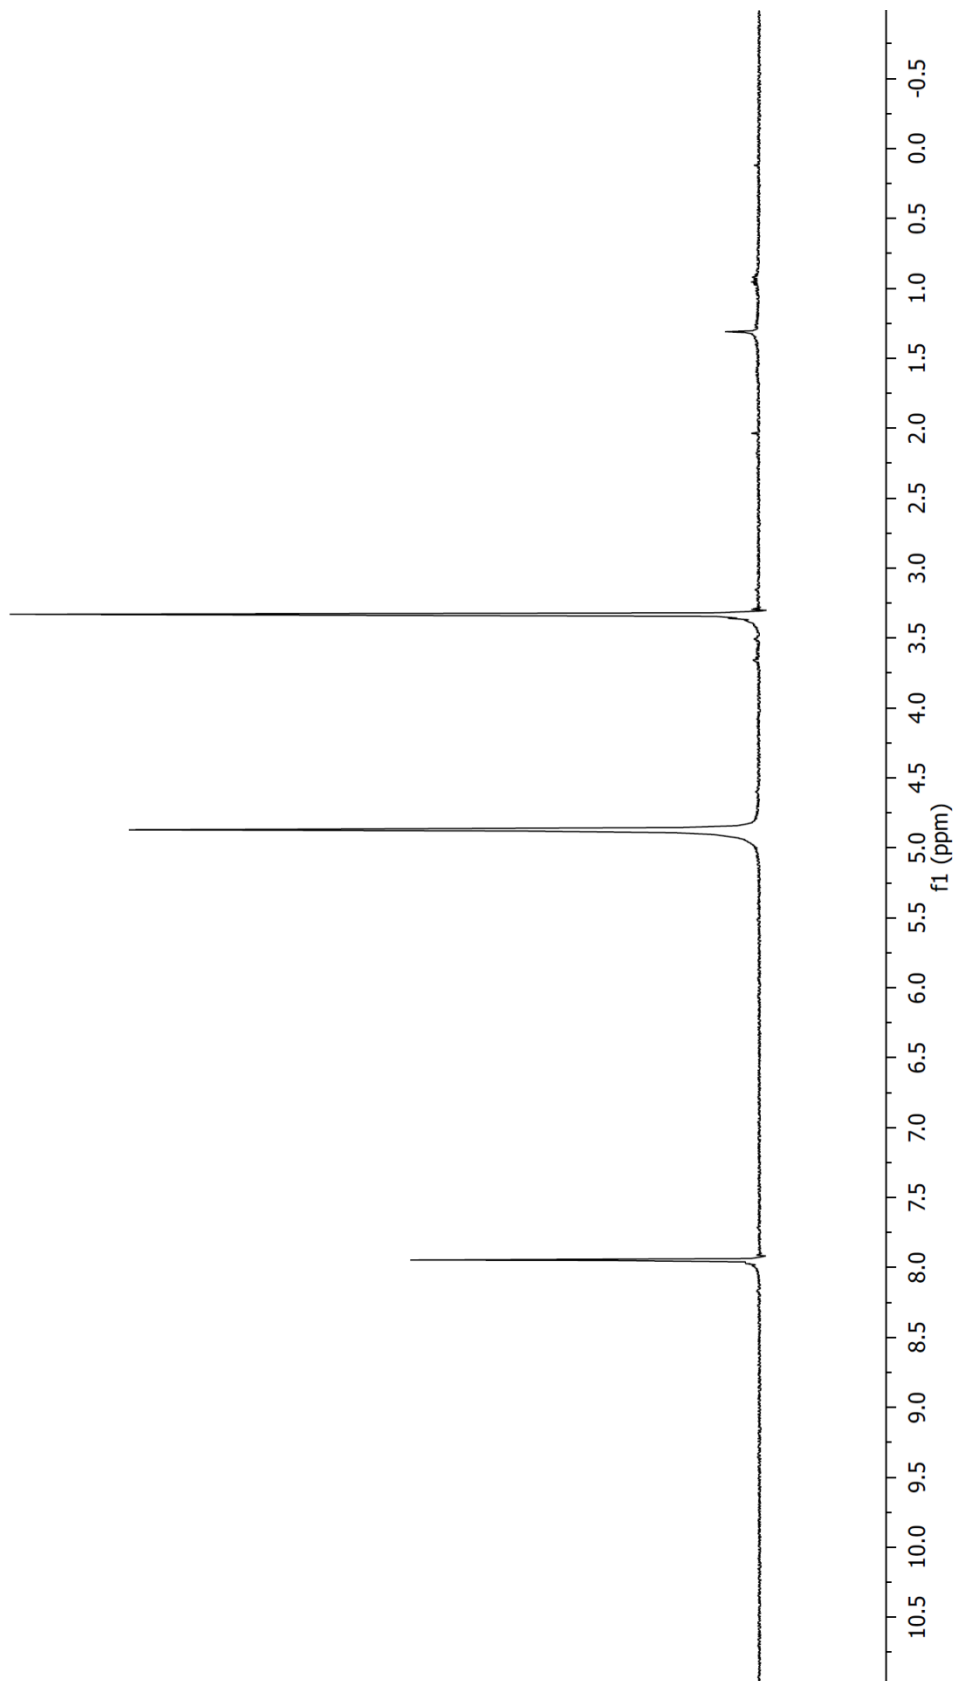

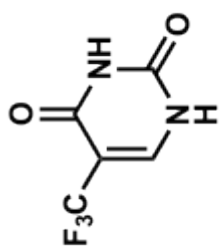

Compound 19  
13C NMR, 150 MHz

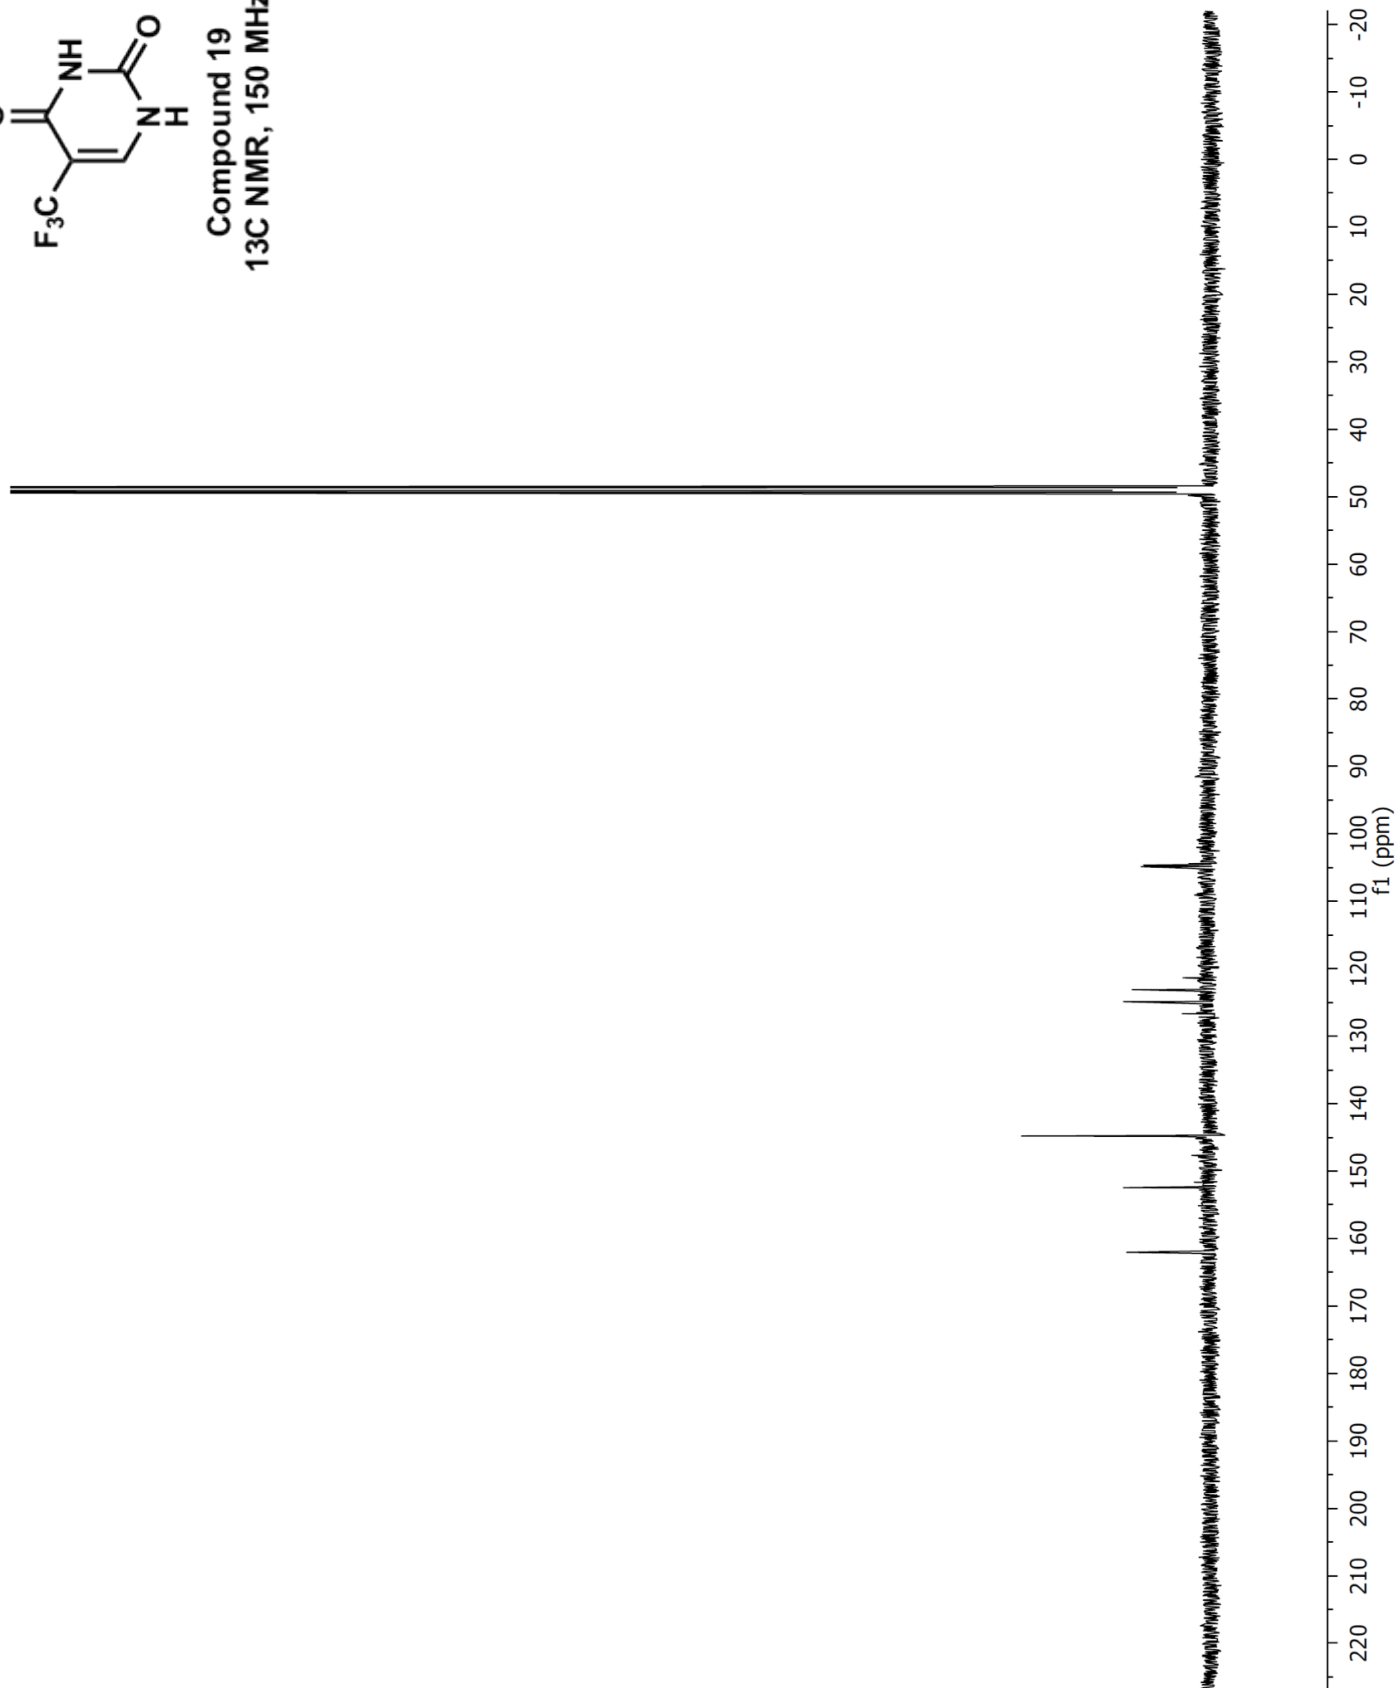

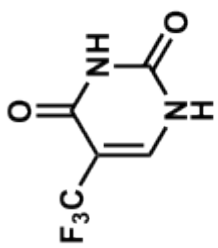

Compound 19  
19F NMR, 376 MHz

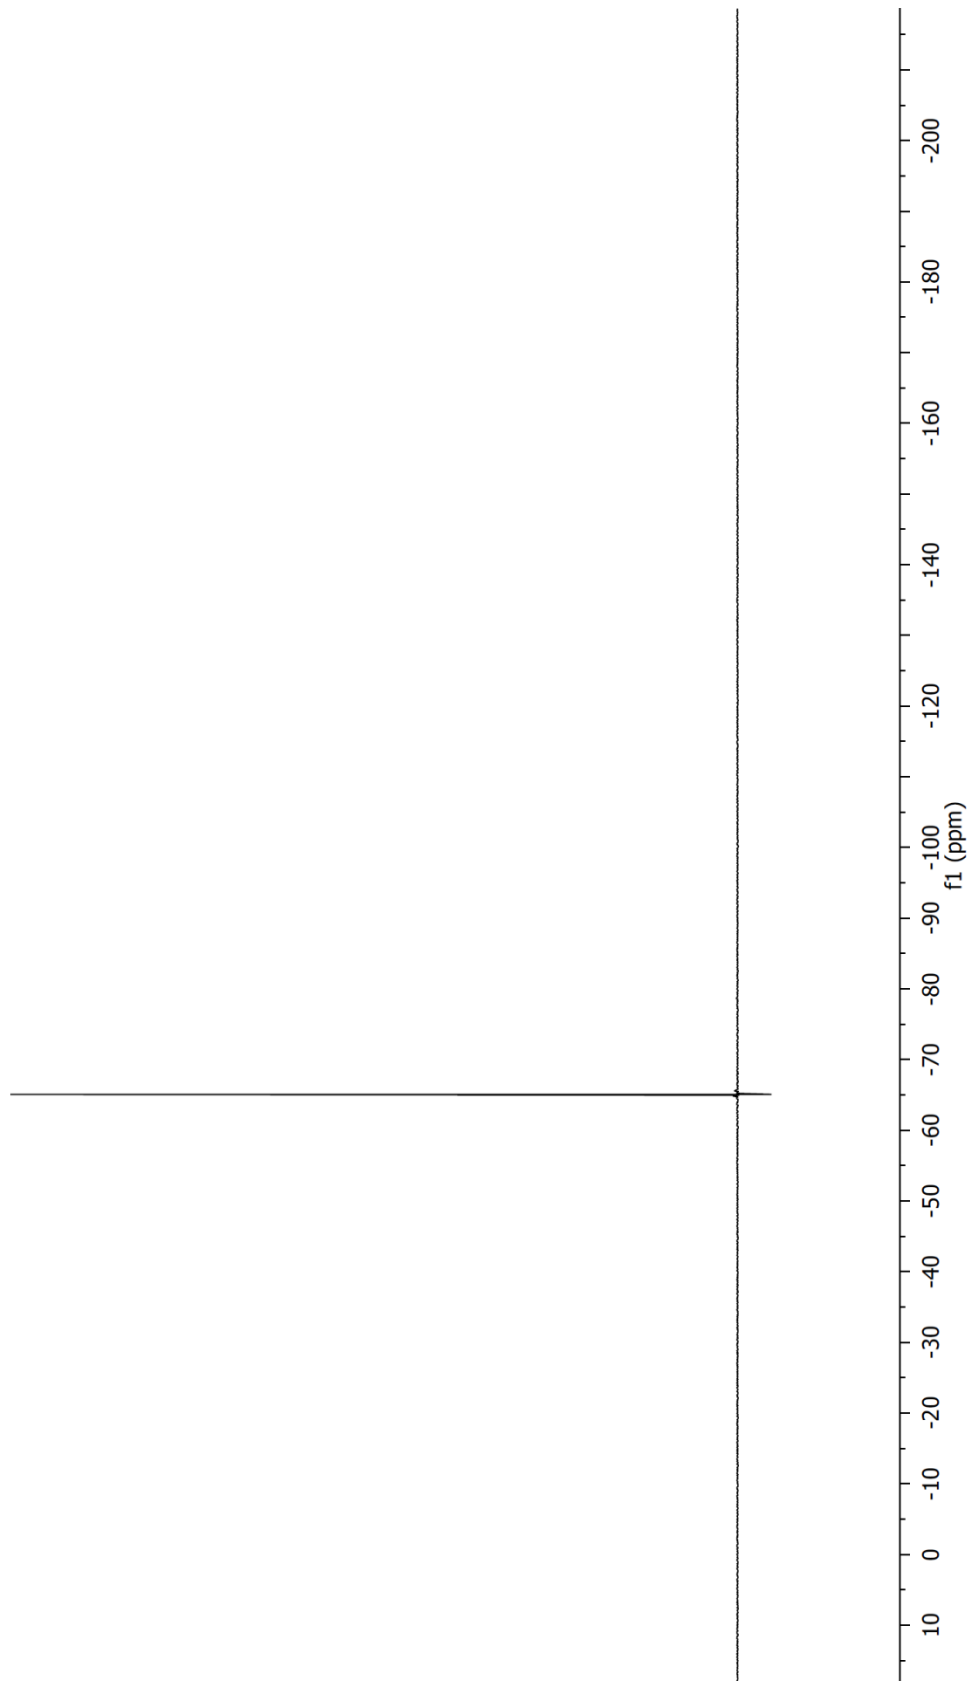

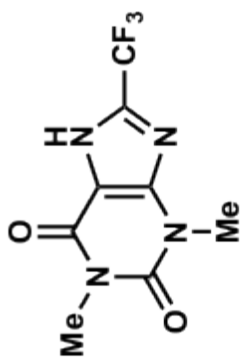

Compound 20  
1H NMR, 400 MHz

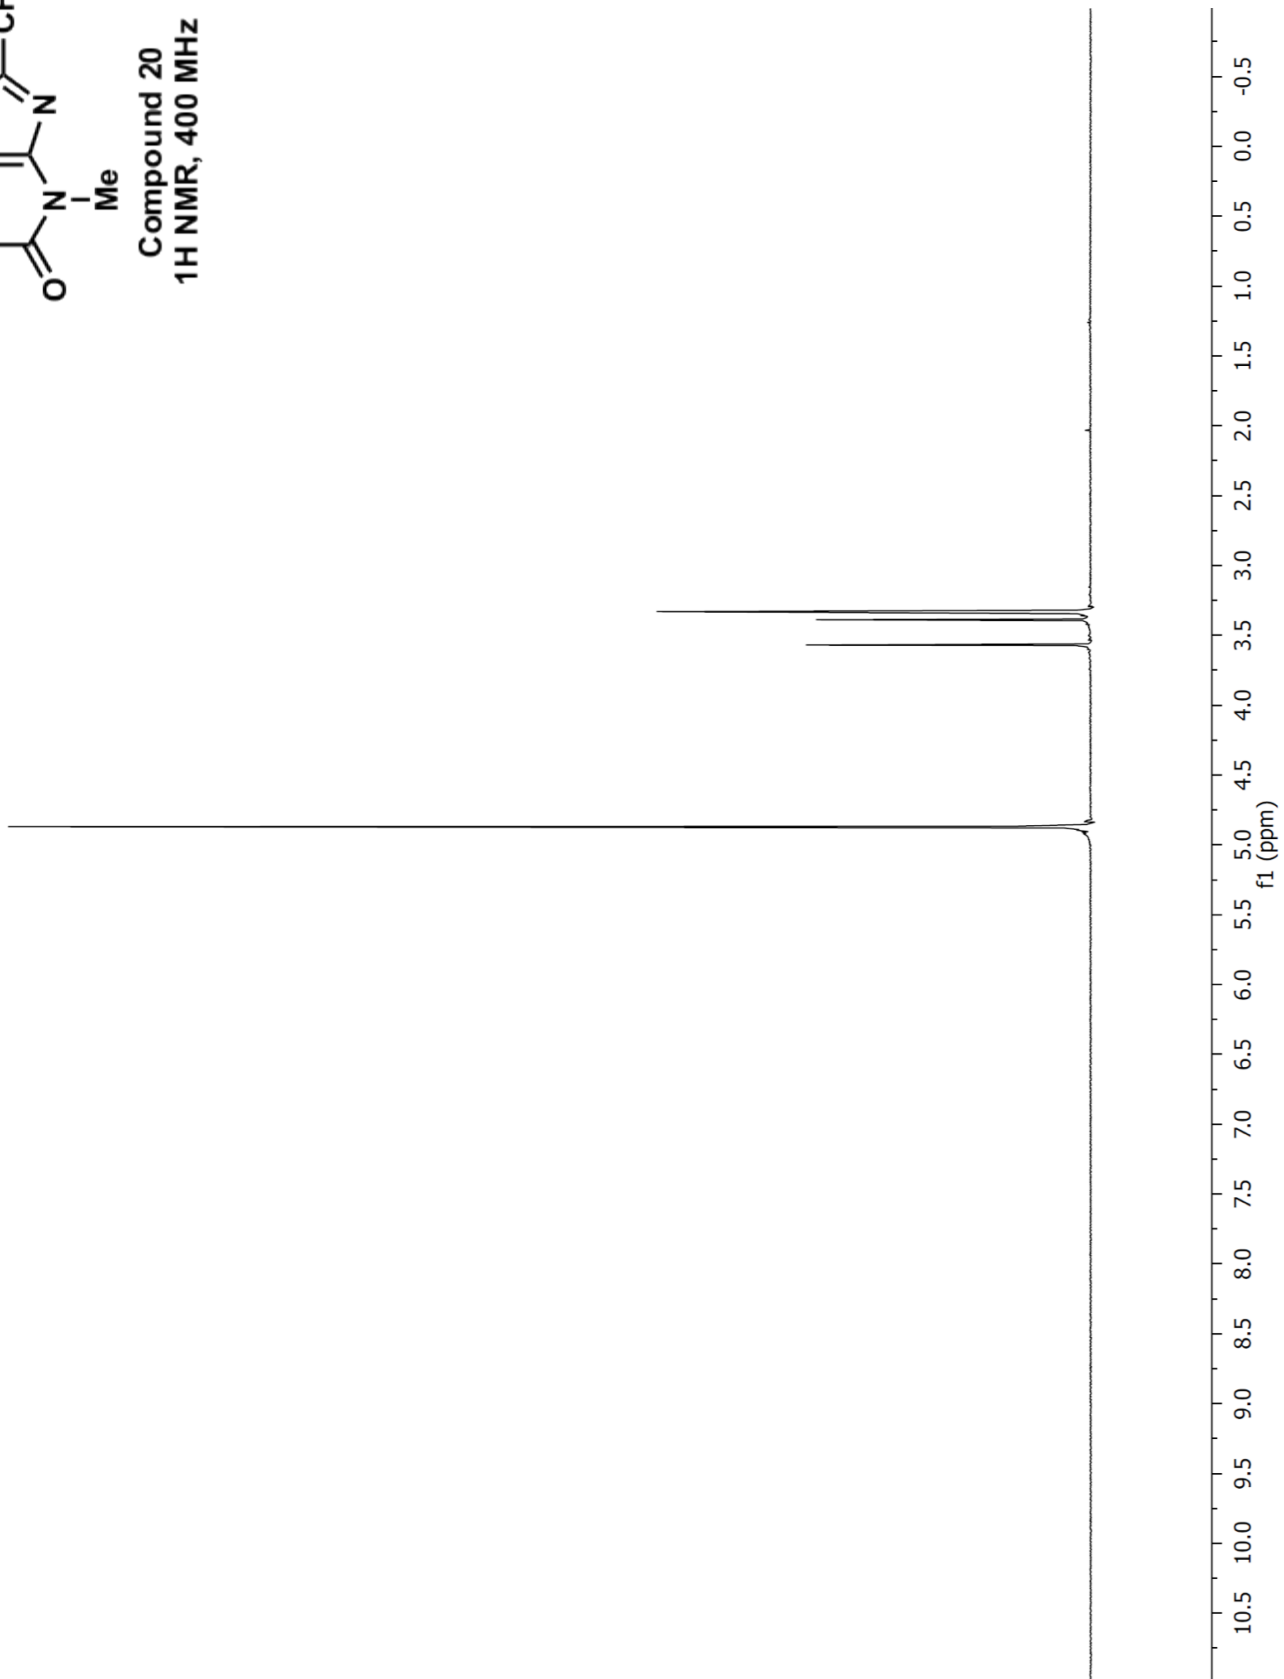

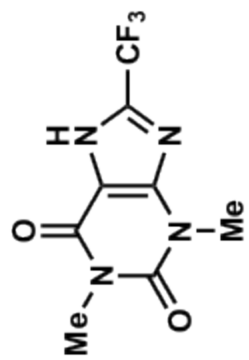

Compound 20  
13C NMR, 150 MHz

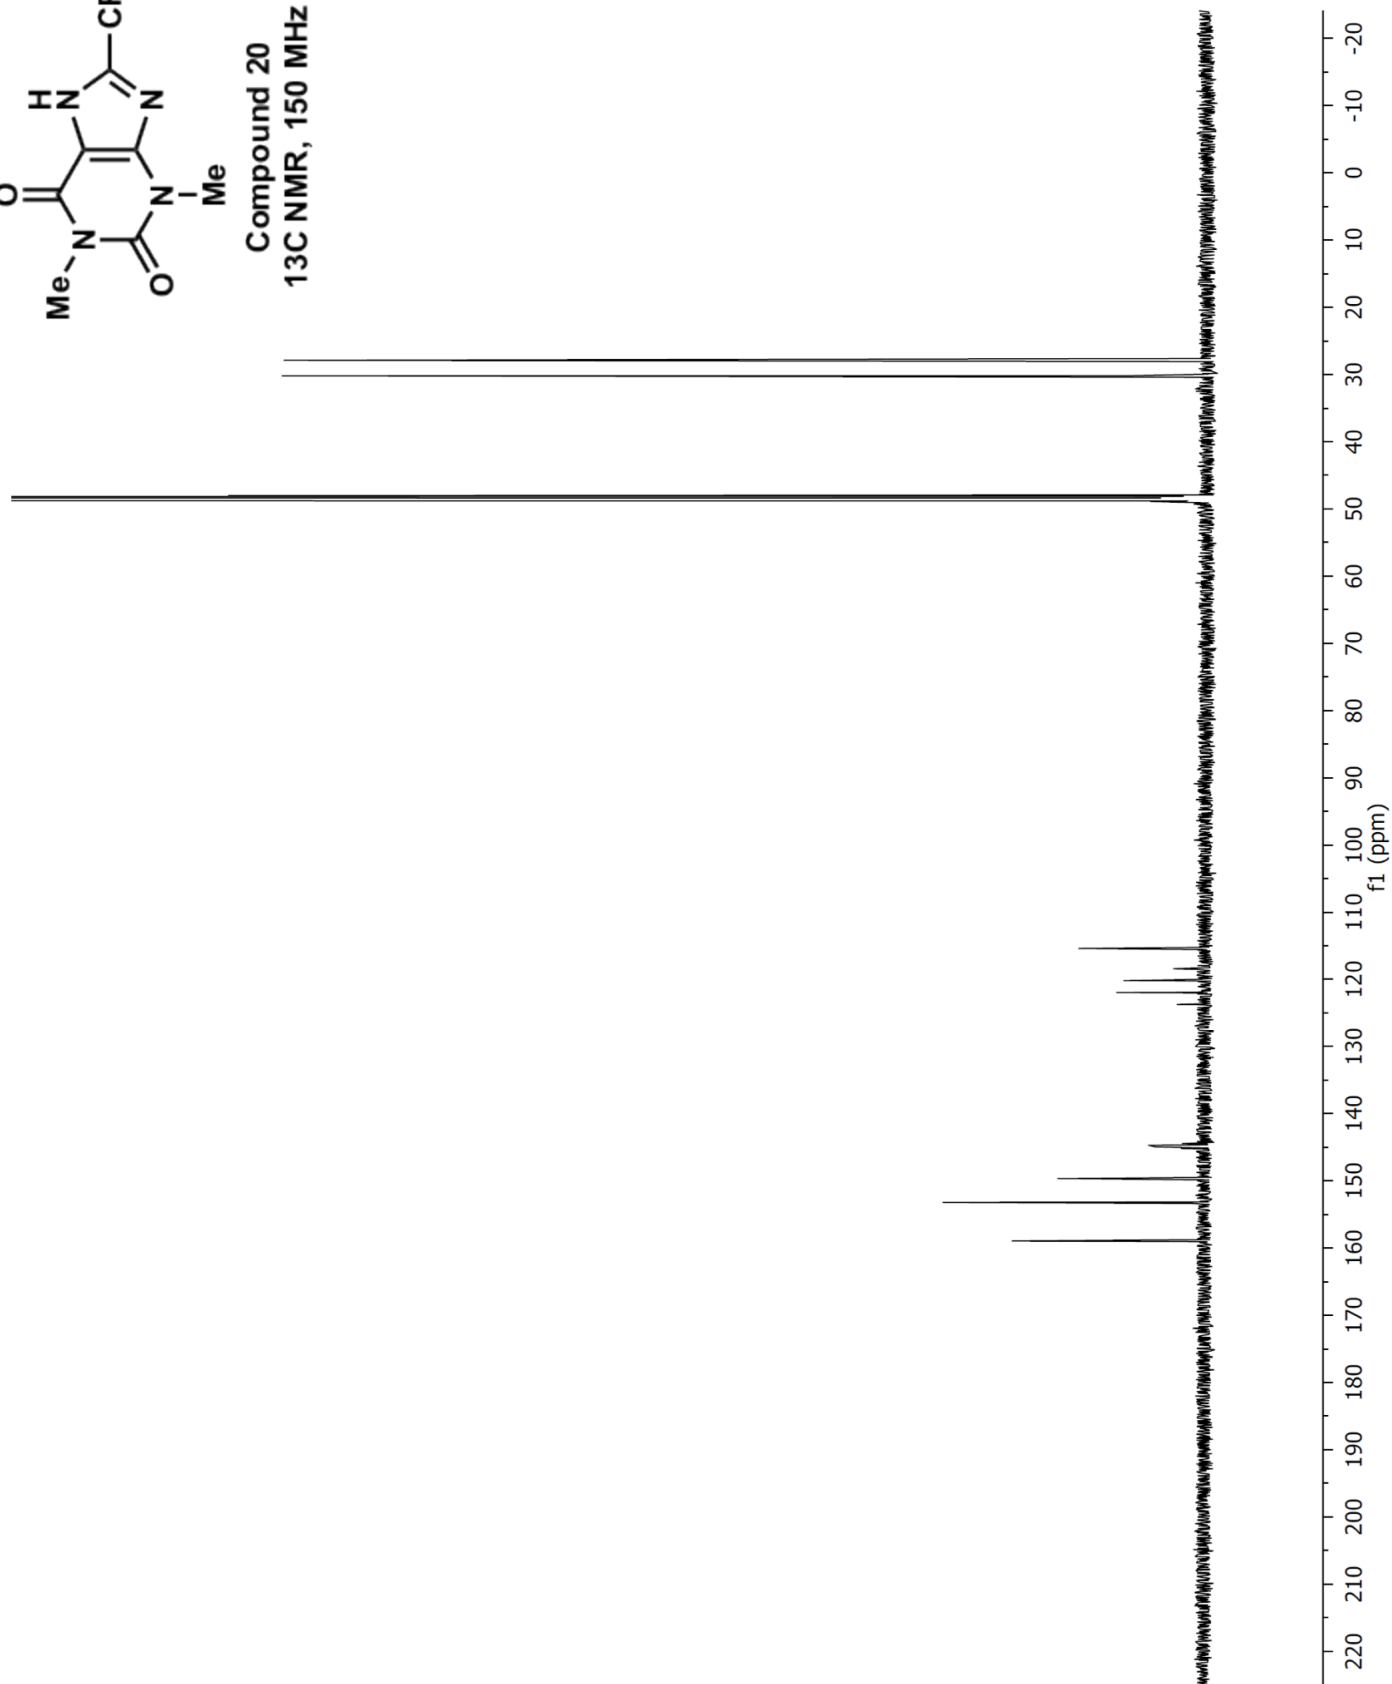

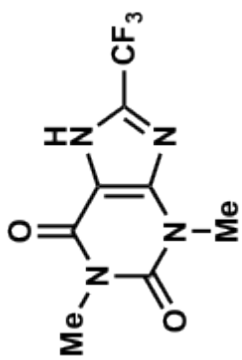

Compound 20  
19F NMR, 376 MHz

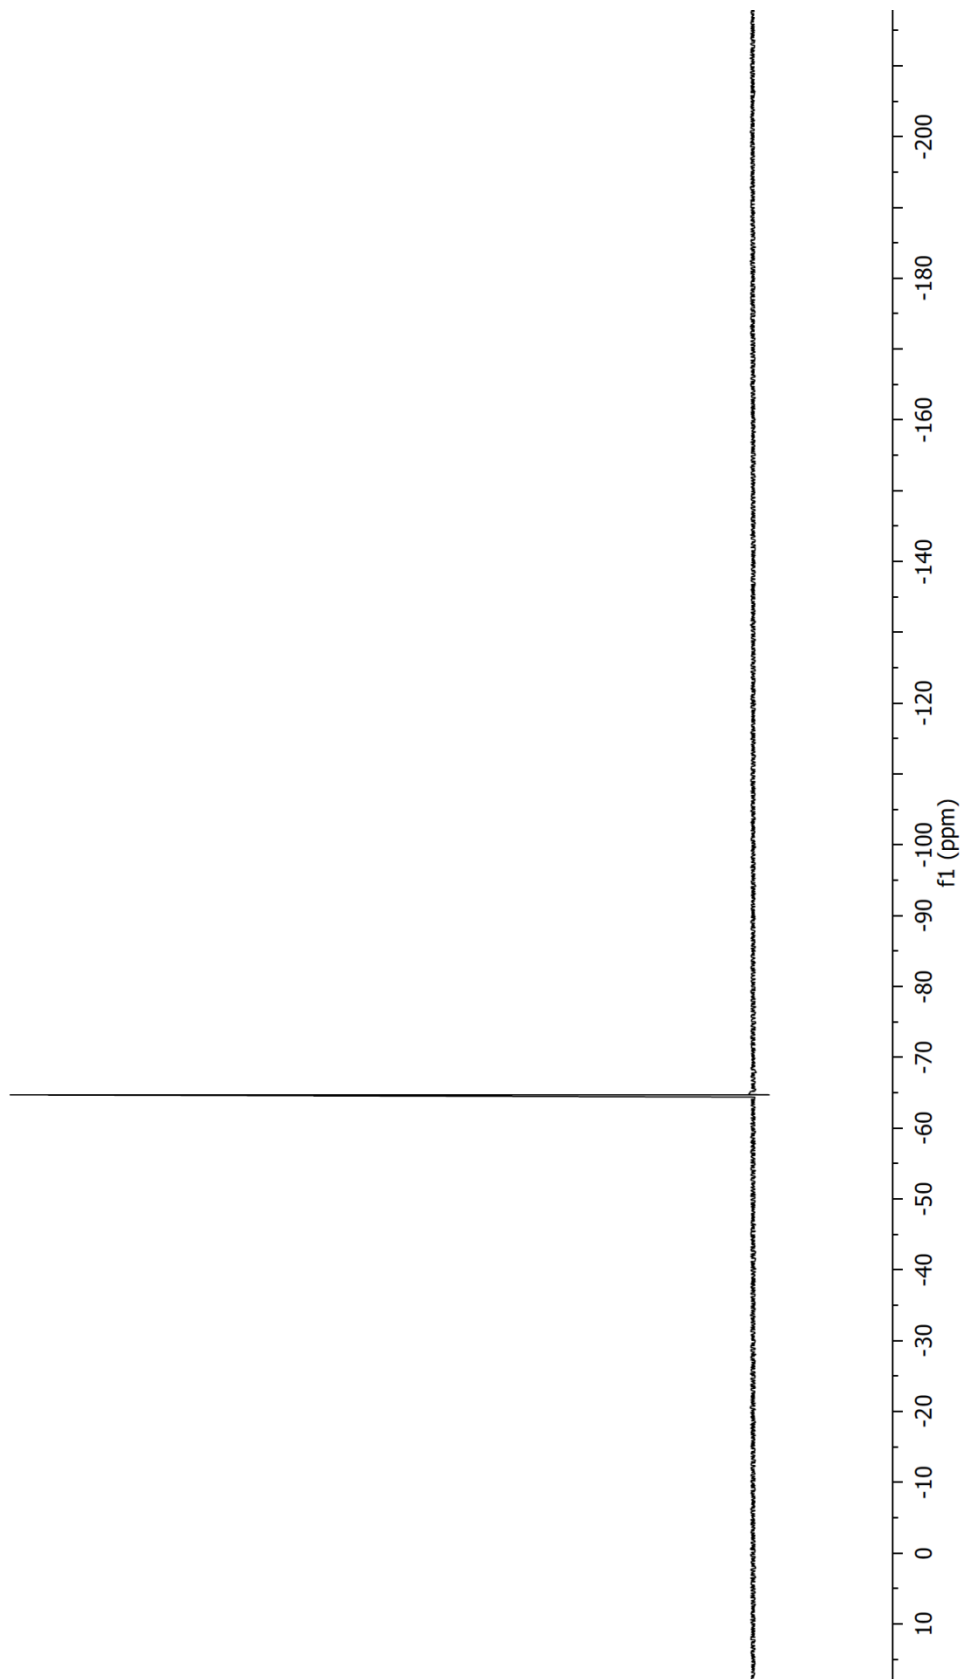

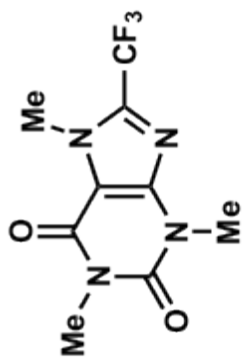

Compound 21  
1H NMR, 400 MHz

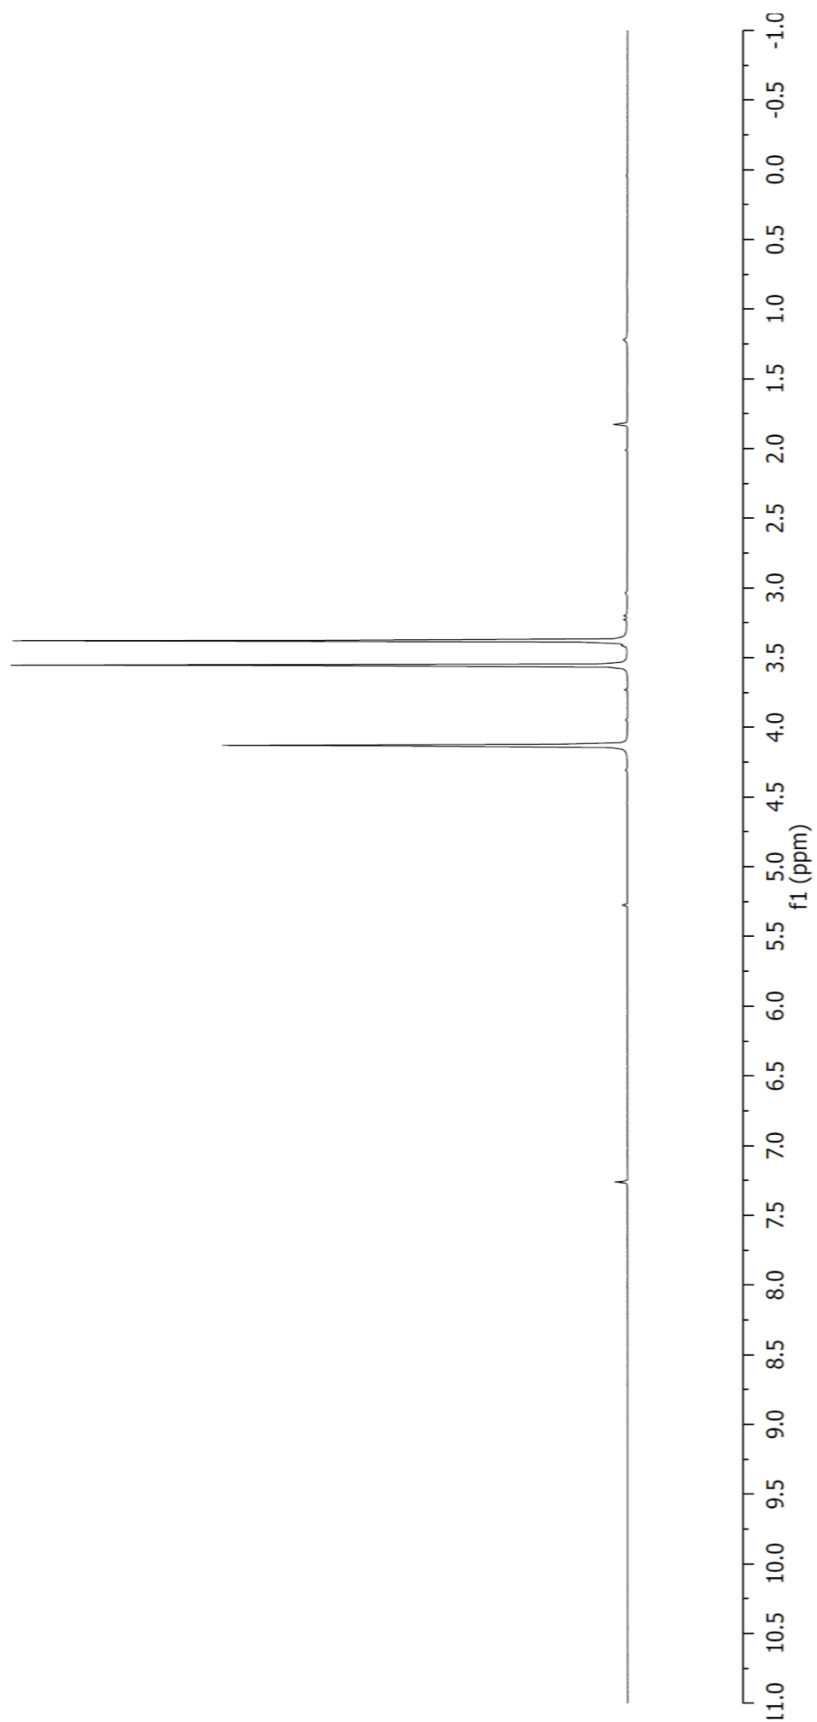



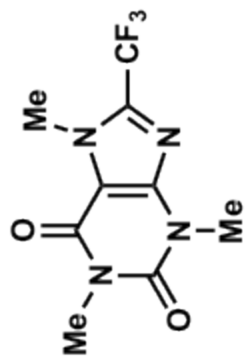

Compound 21  
13C NMR, 150 MHz

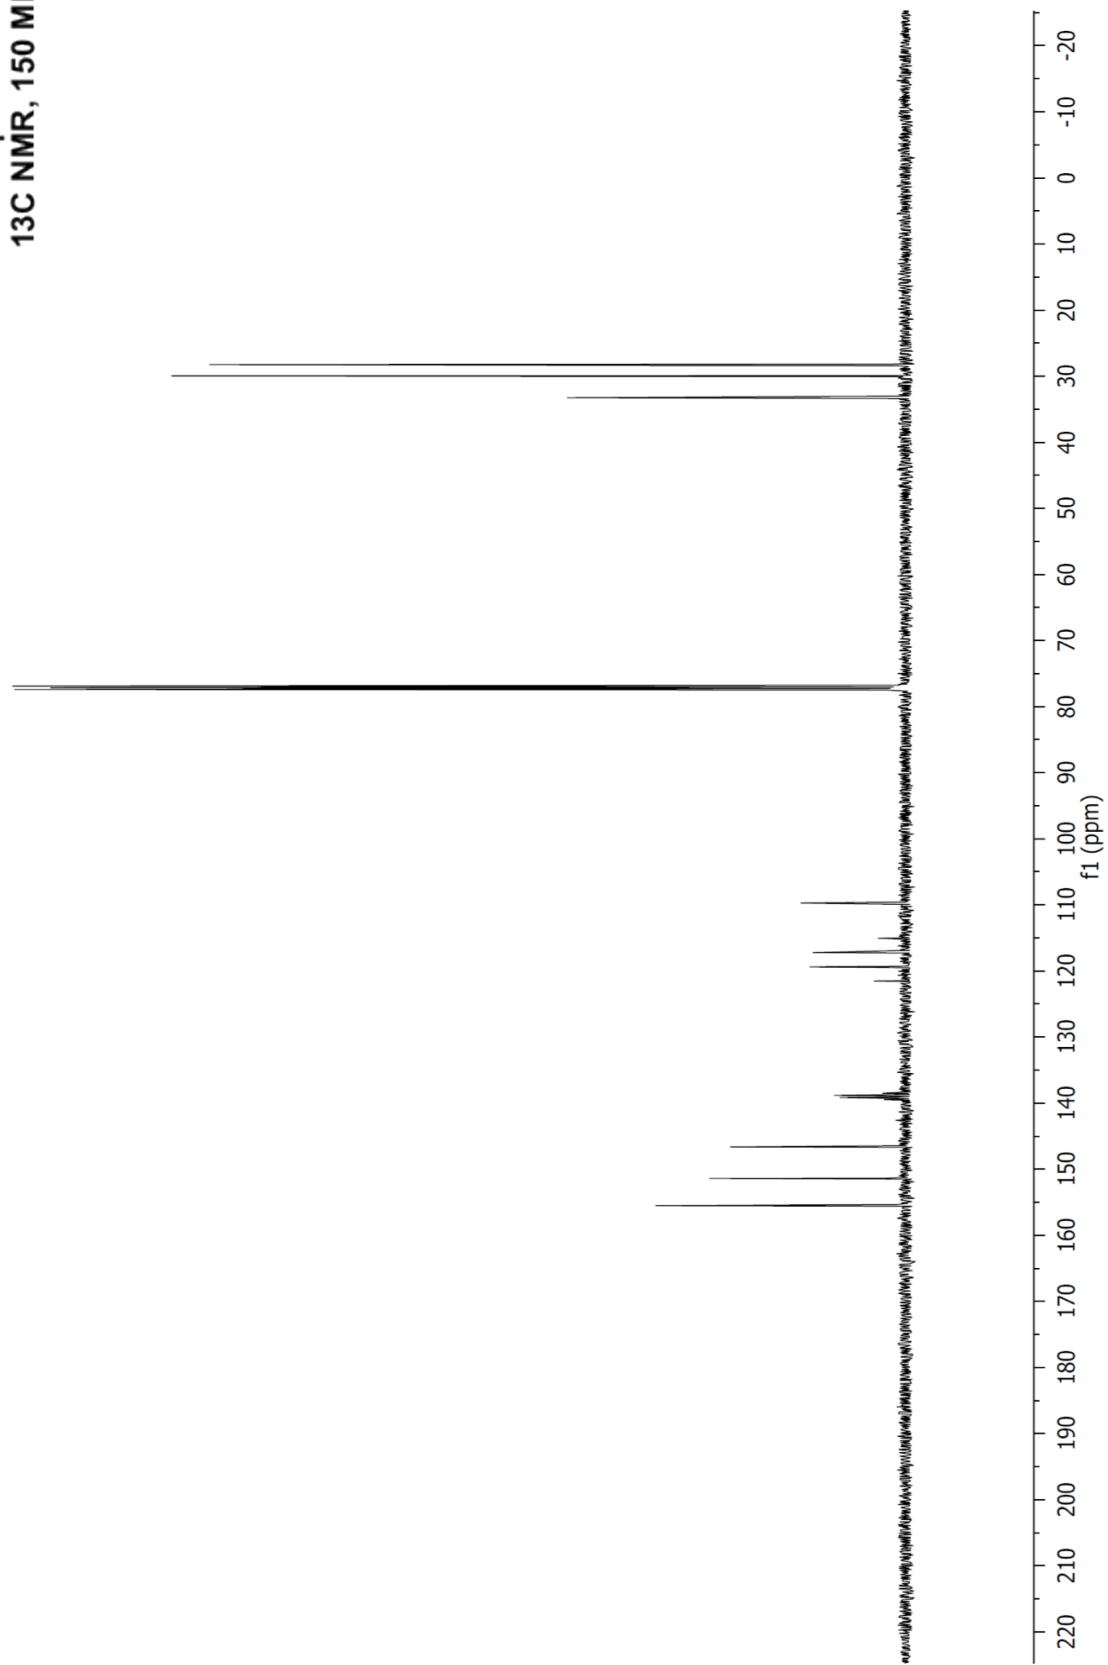

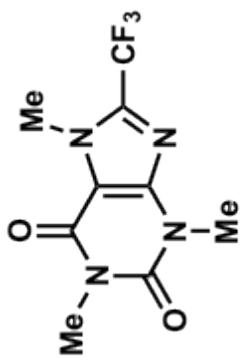

Compound 21  
19F NMR, 376 MHz

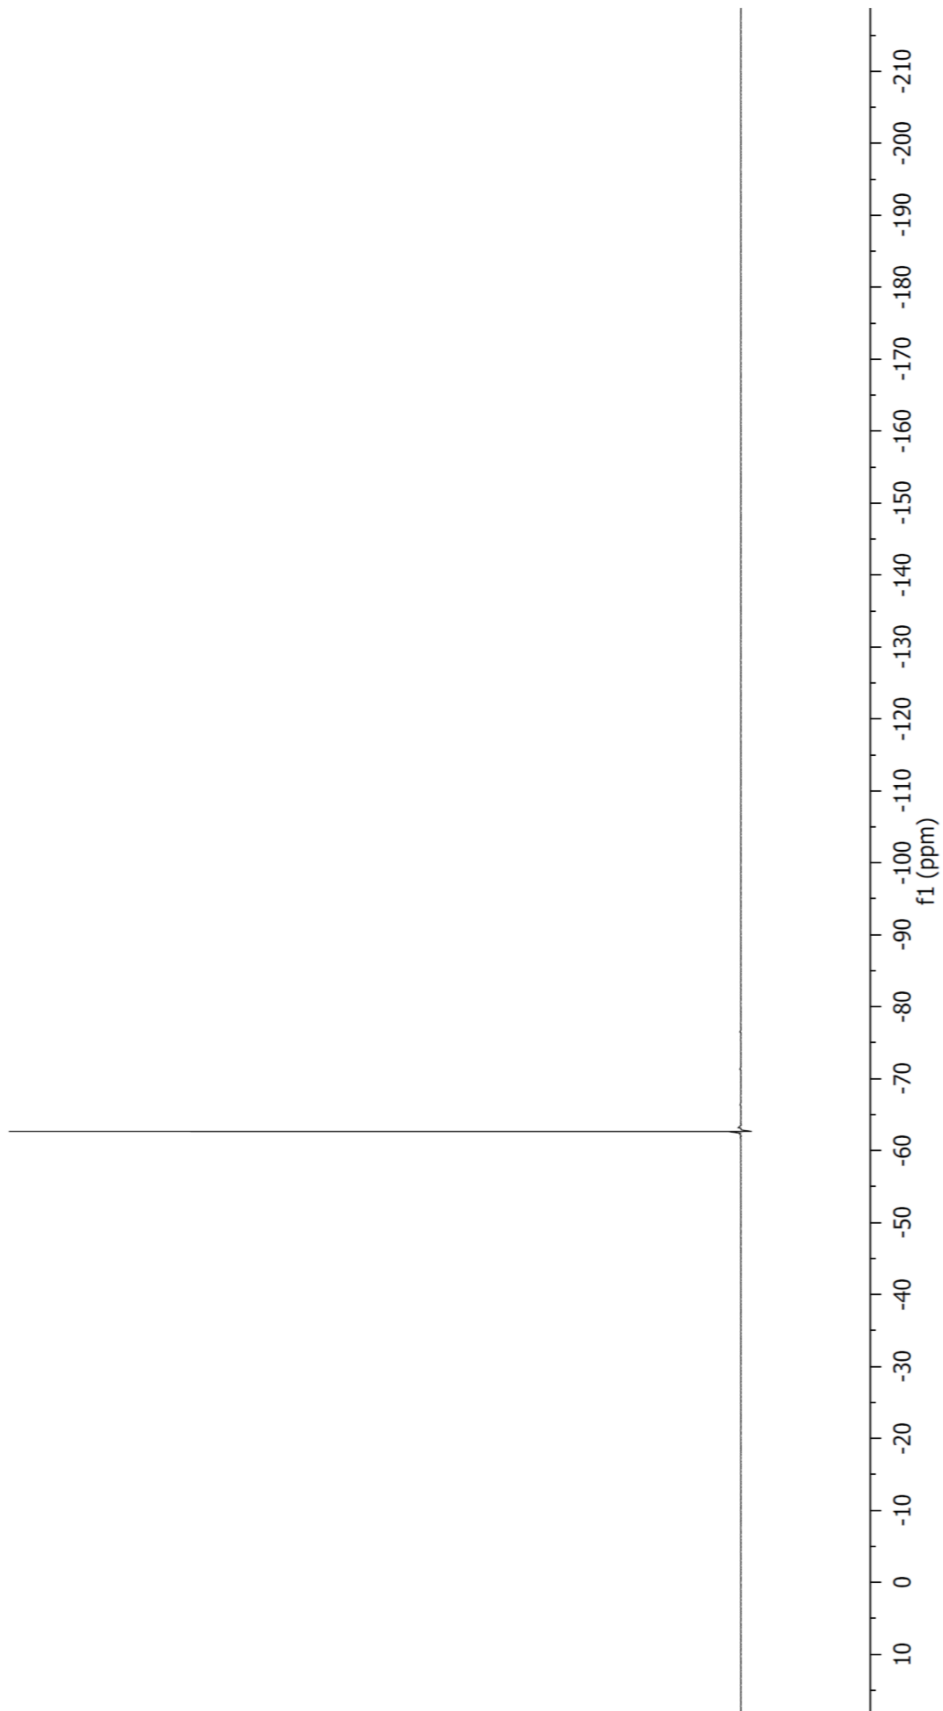

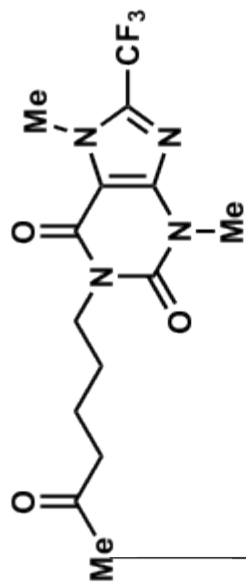

Compound 22  
1H NMR, 600 MHz

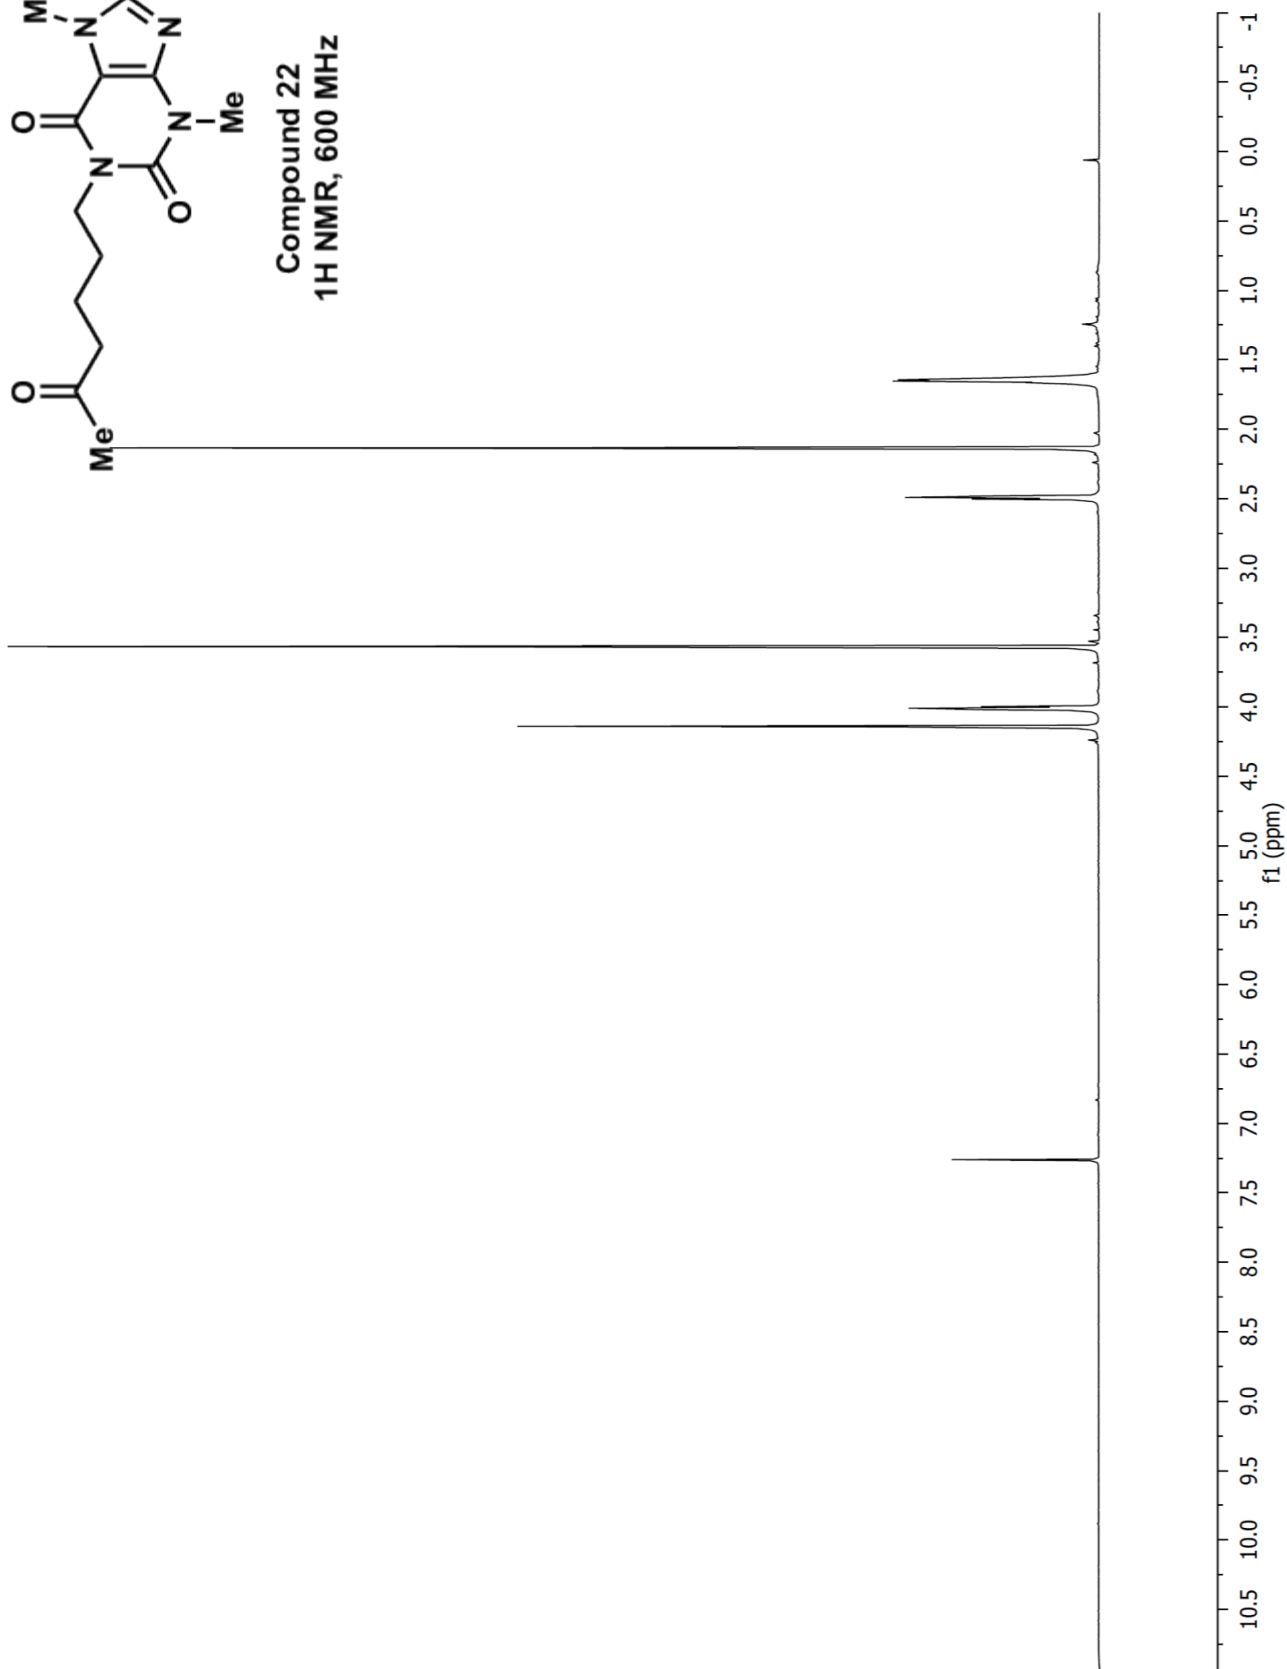

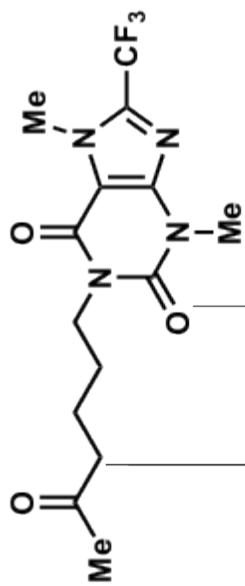

Compound 22  
13C NMR, 150 MHz

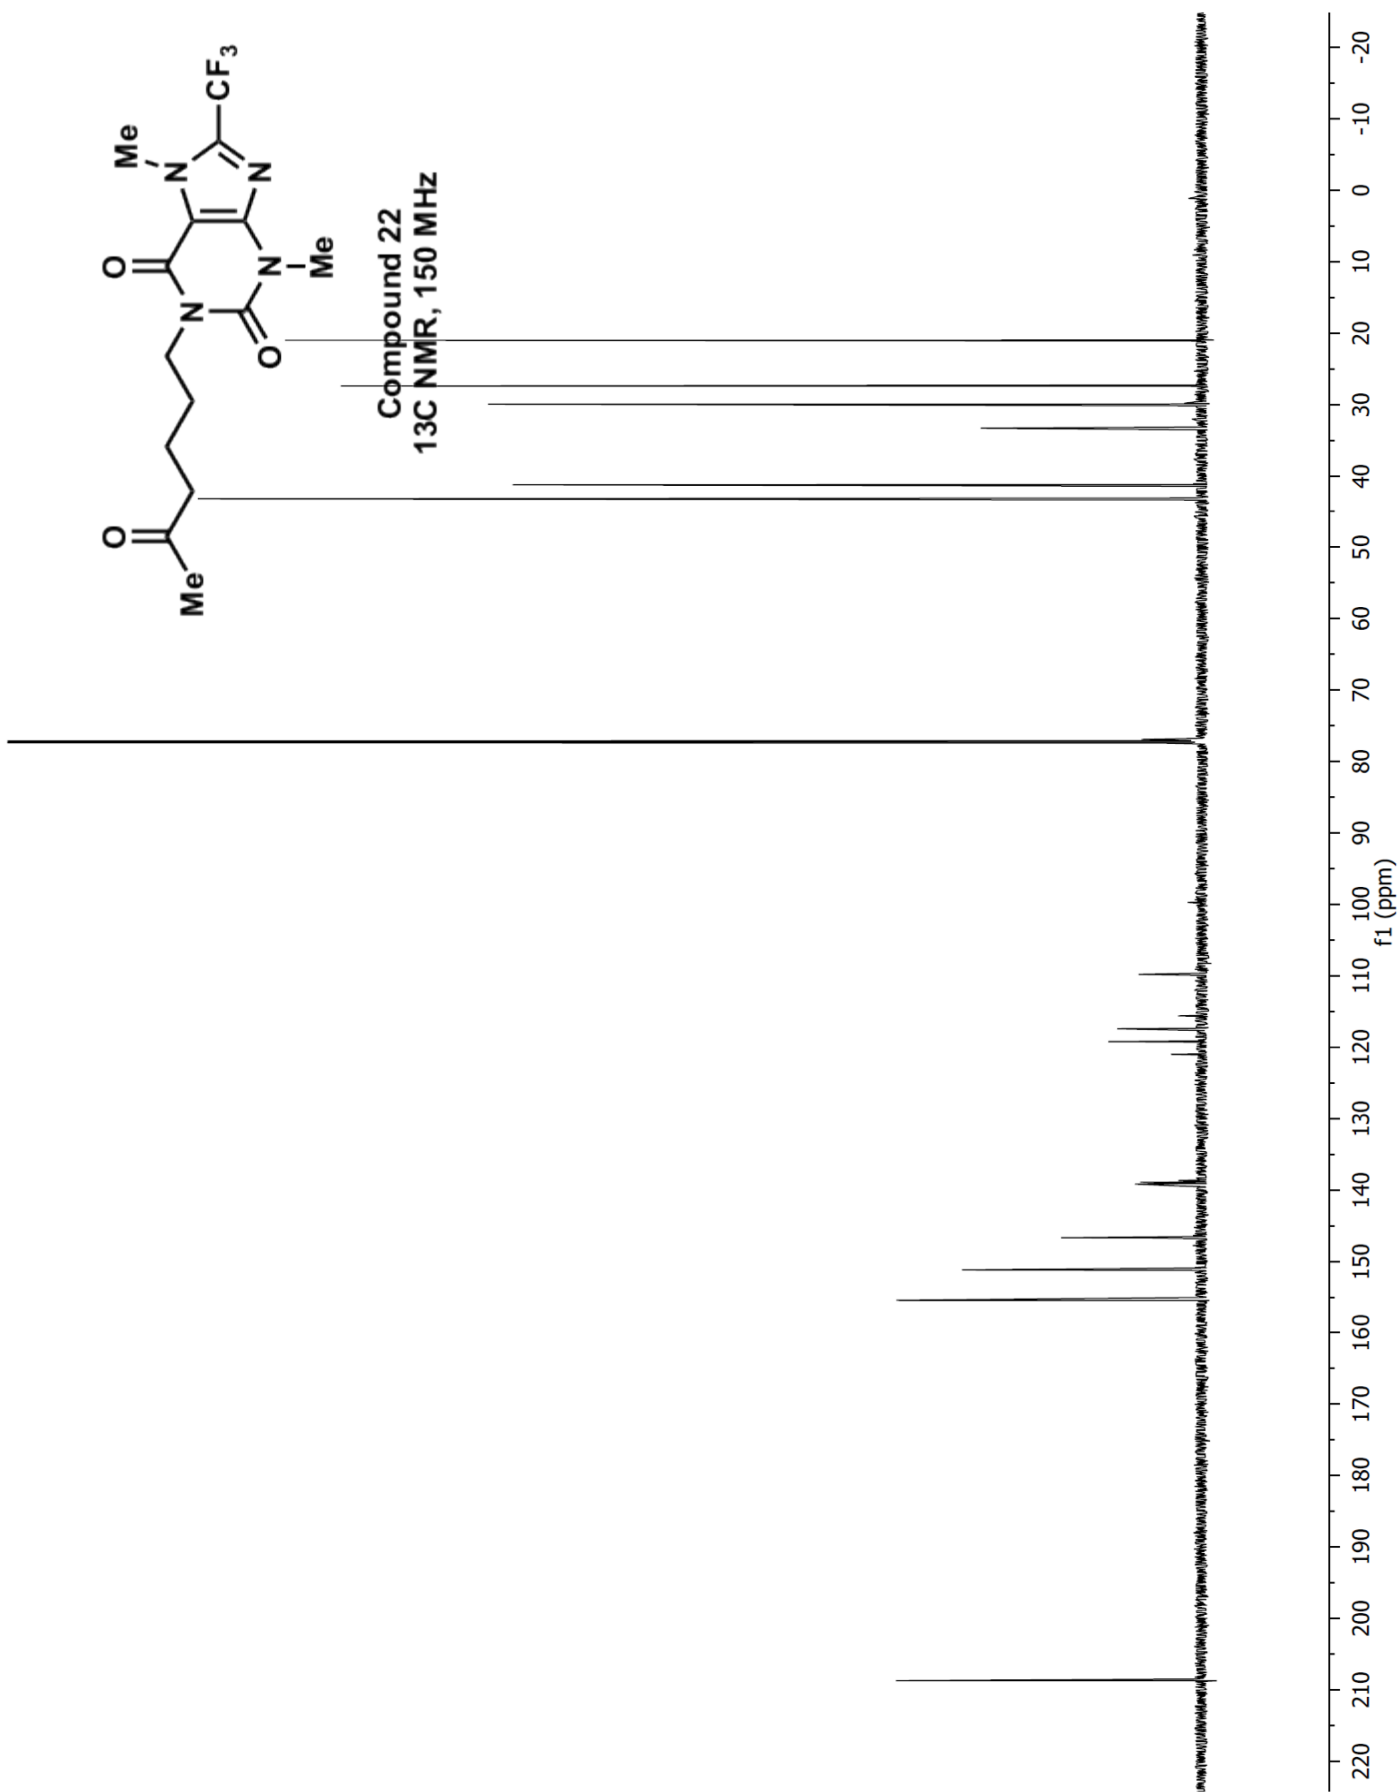

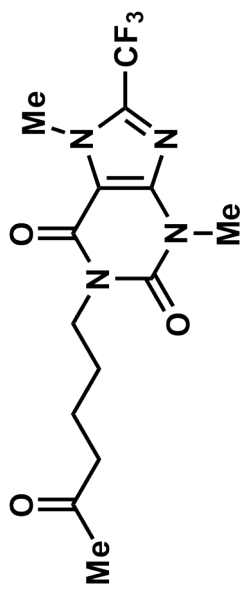

Compound 22  
19F NMR, 376 MHz

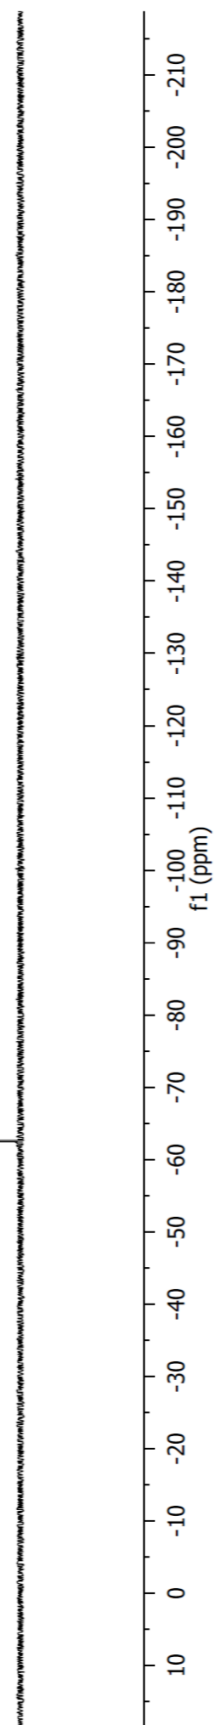

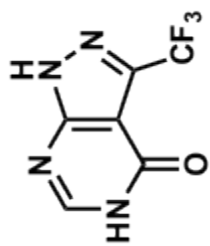

Compound 23  
1H NMR, 400 MHz

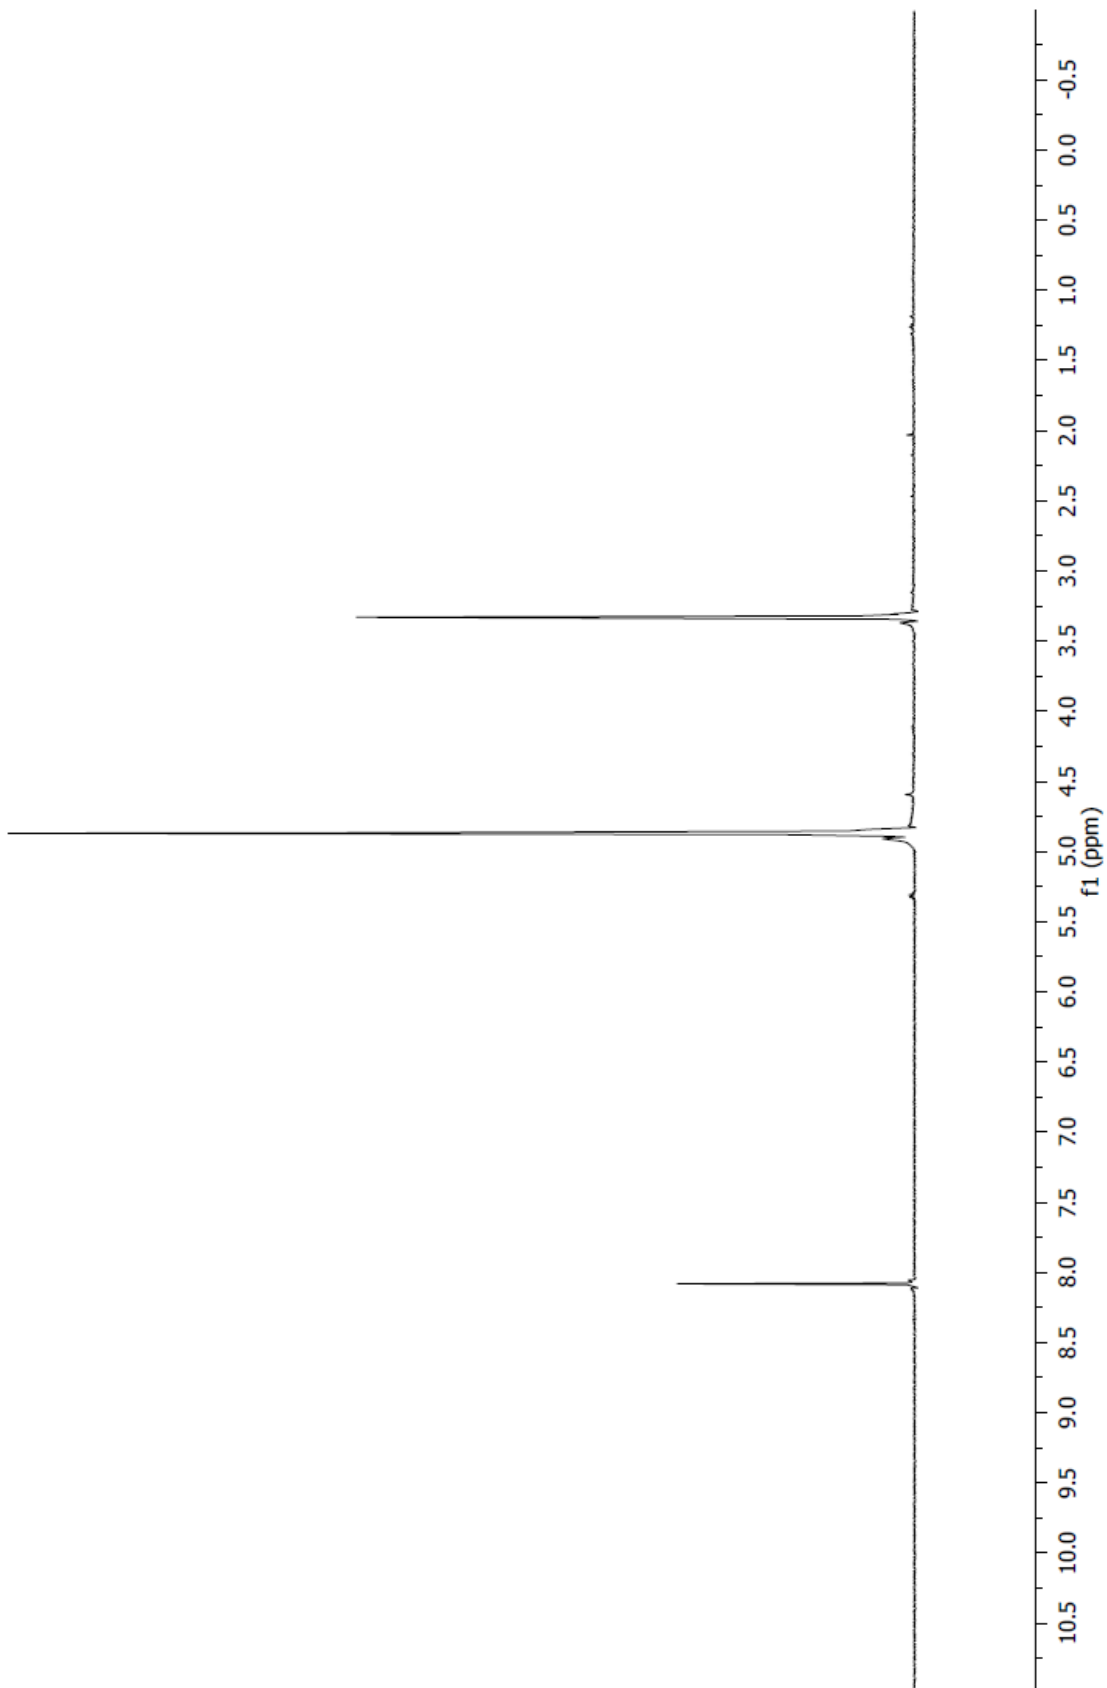

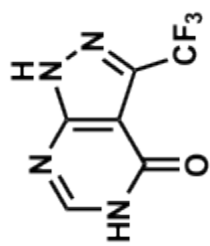

Compound 23  
13C NMR, 150 MHz

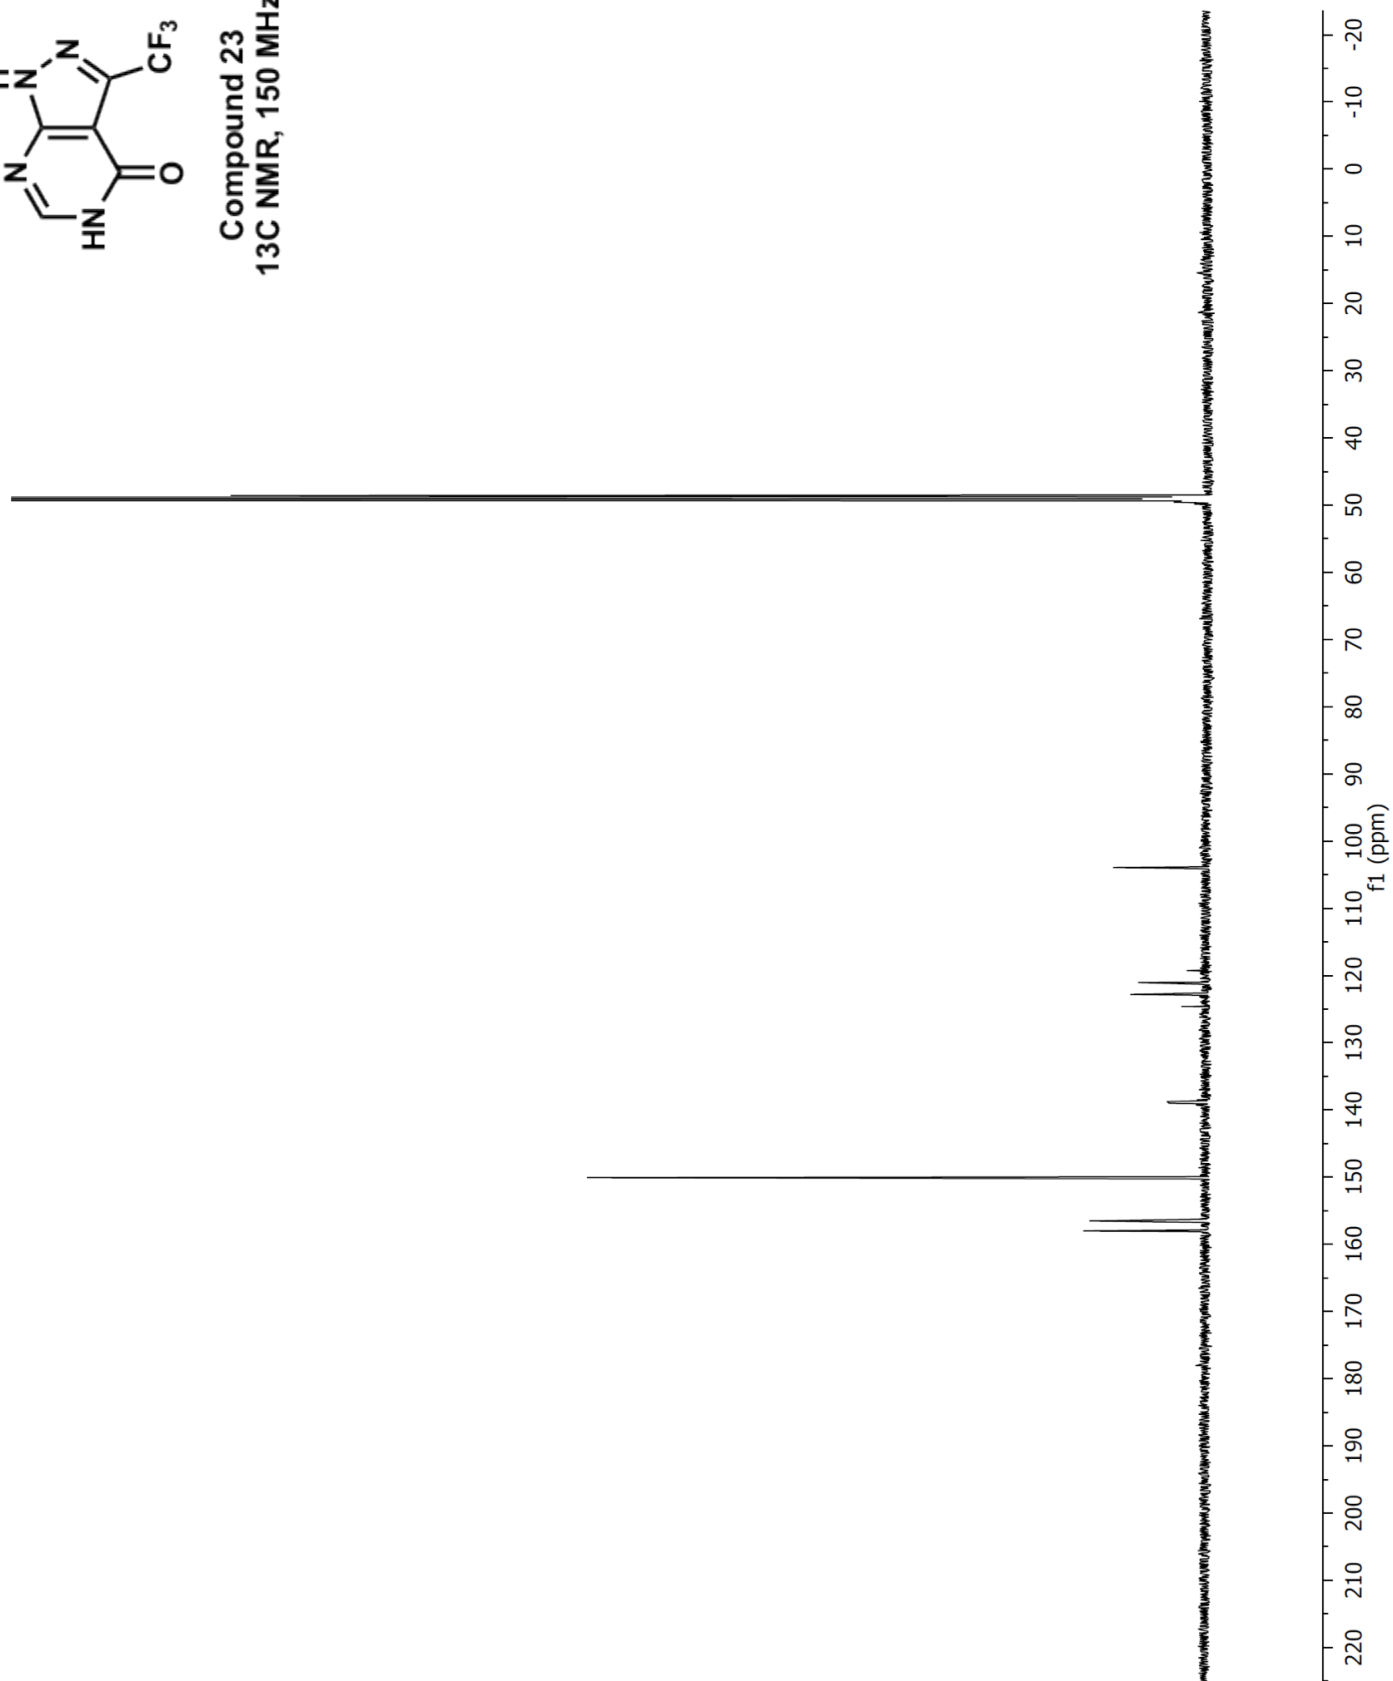

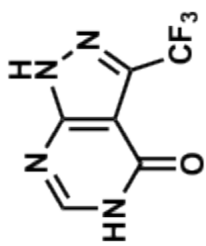

Compound 23  
19F NMR, 376 MHz

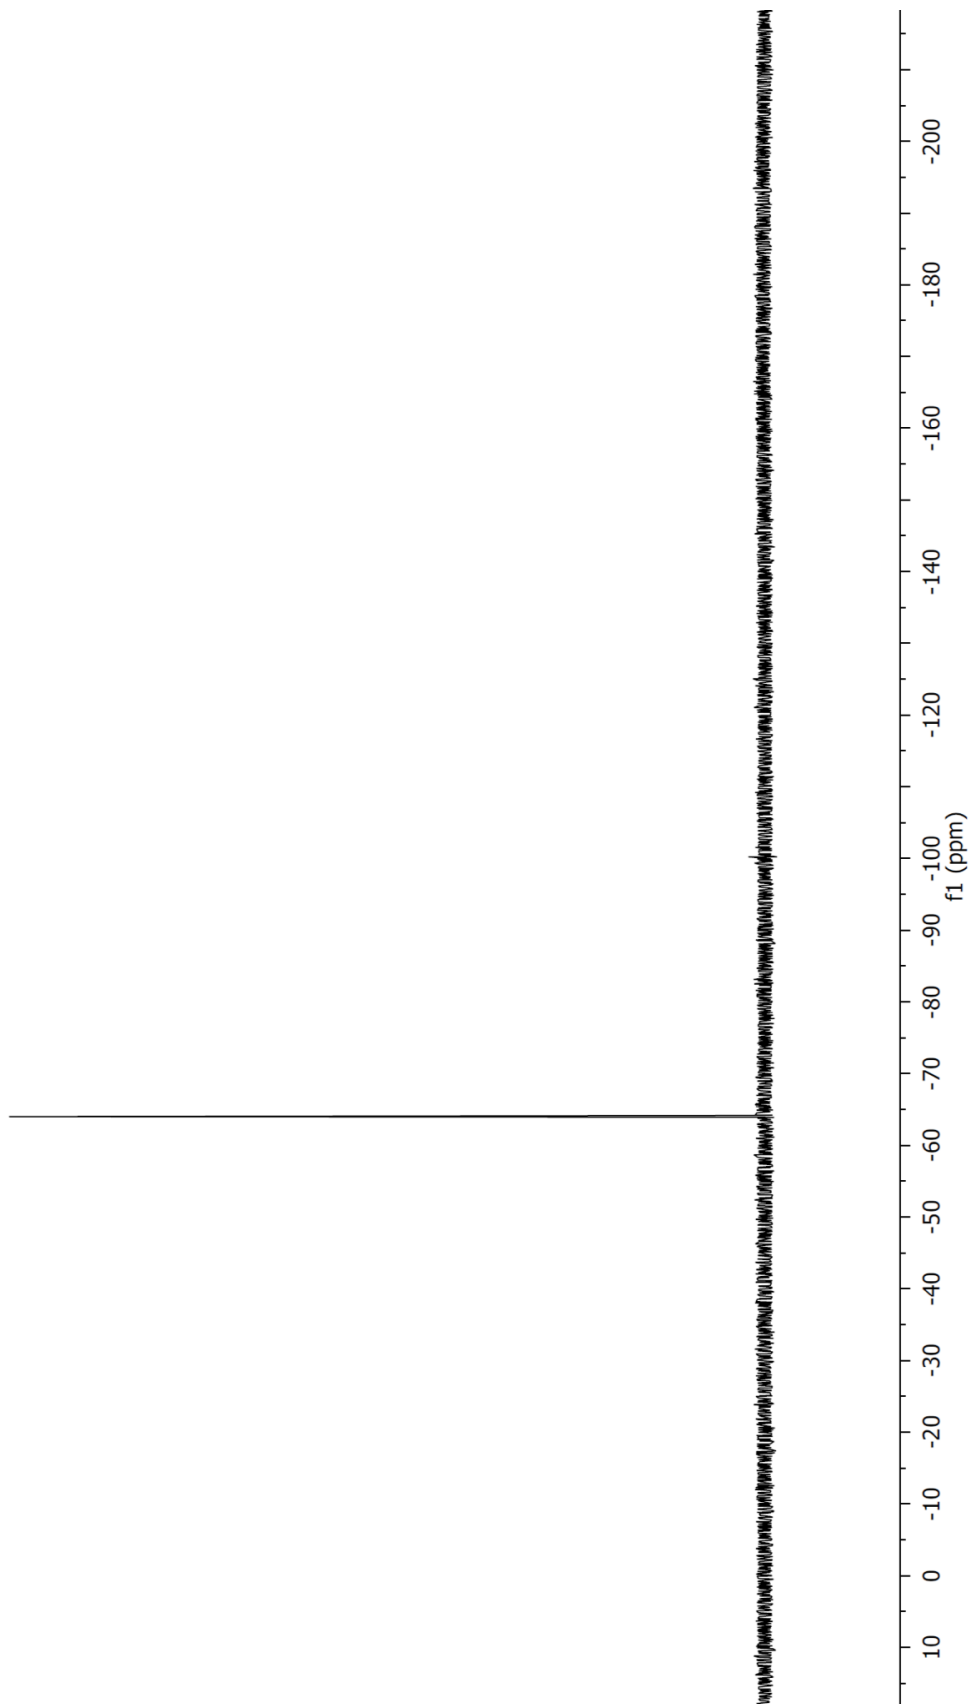



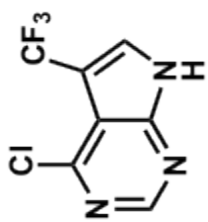

Compound 24  
1H NMR, 400 MHz

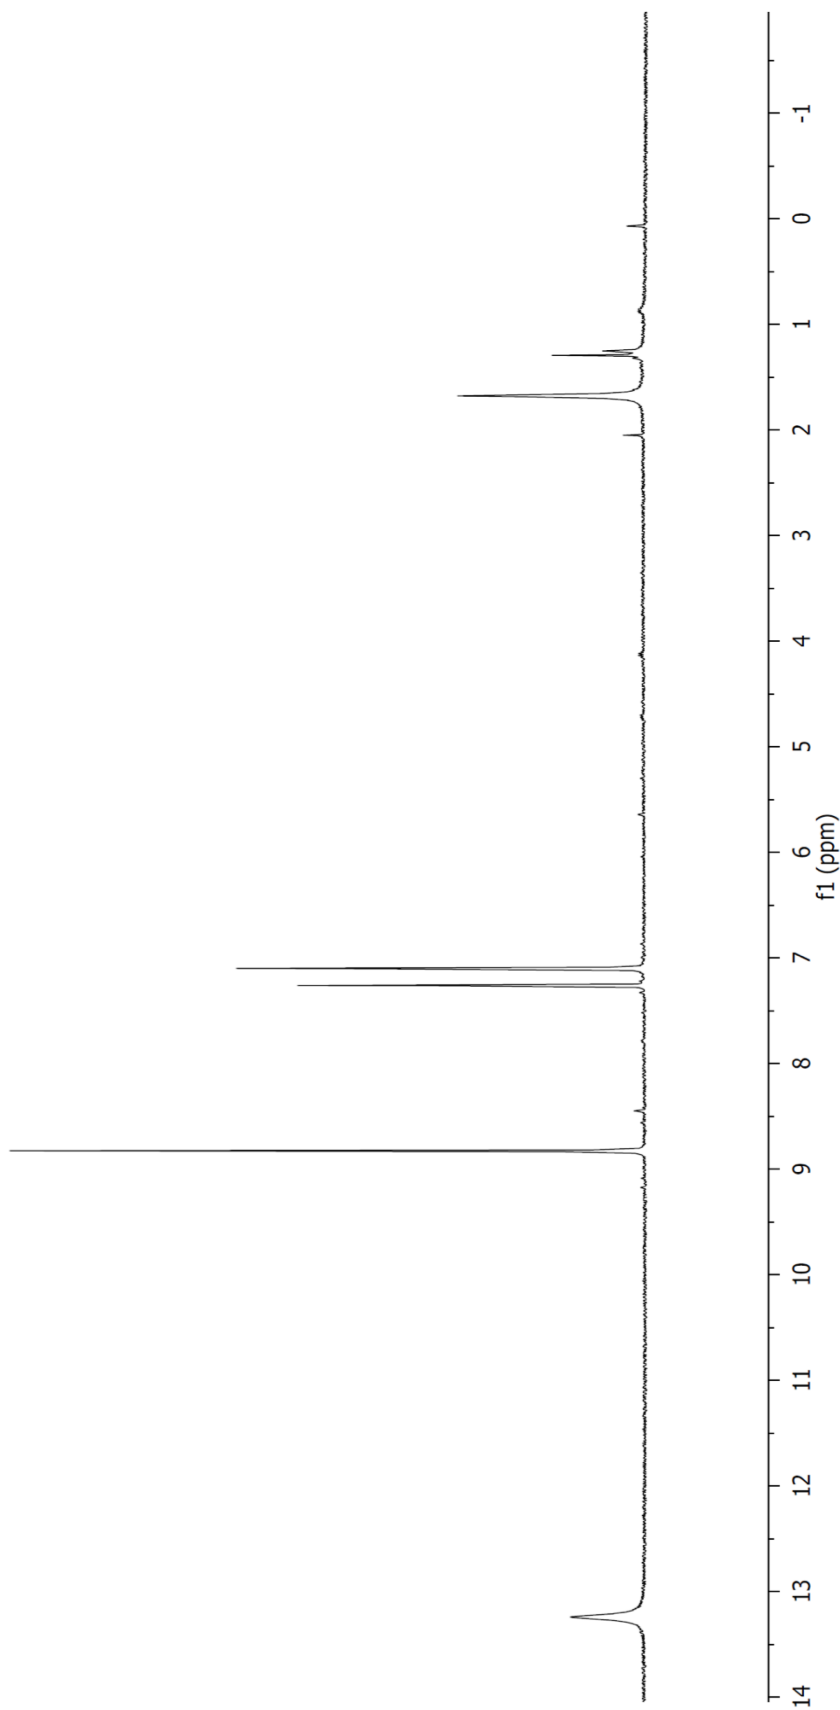

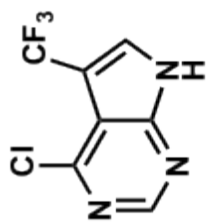

Compound 24  
13C NMR, 150 MHz

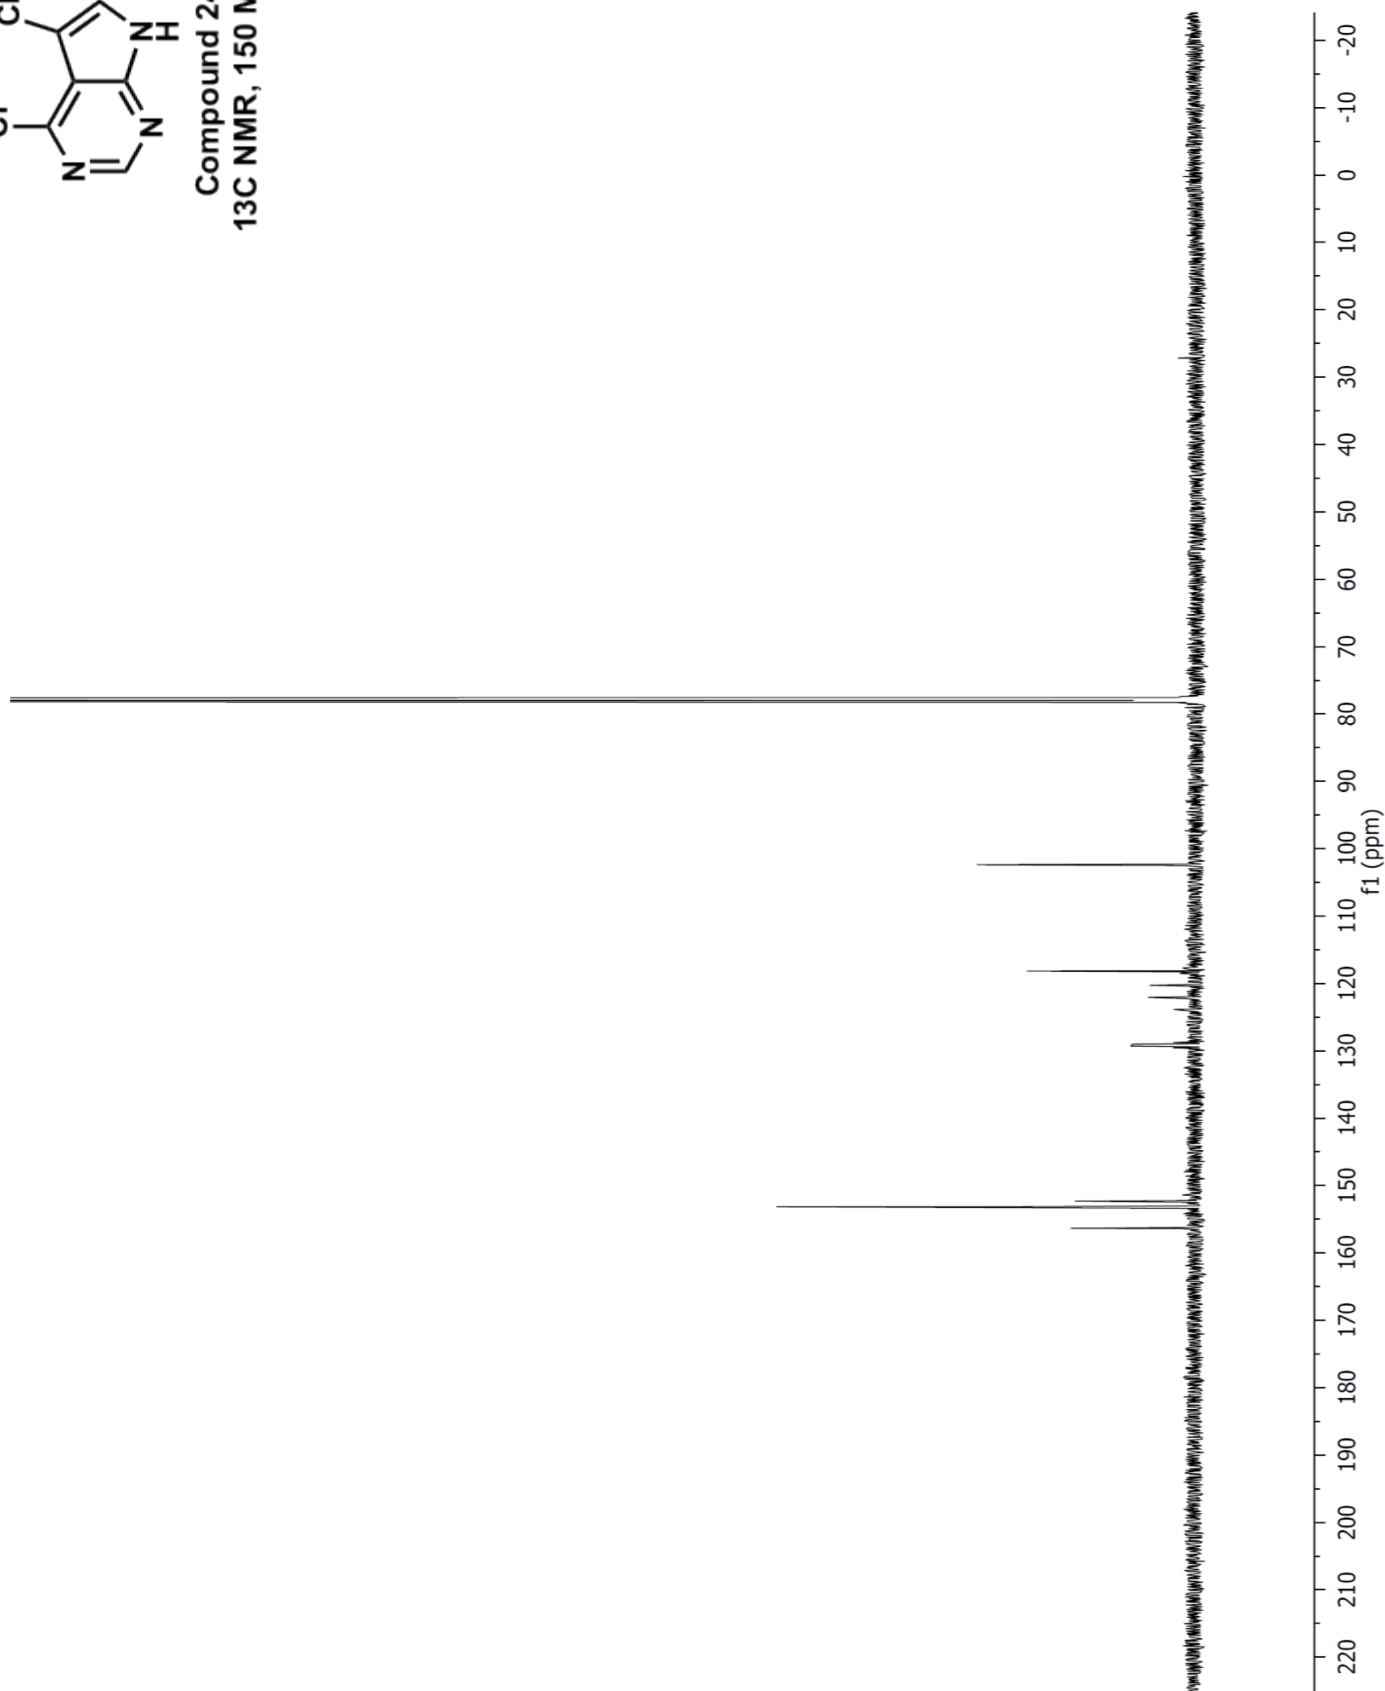

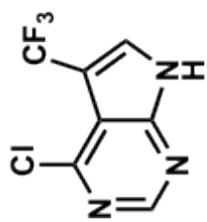

Compound 24  
19F NMR, 376 MHz

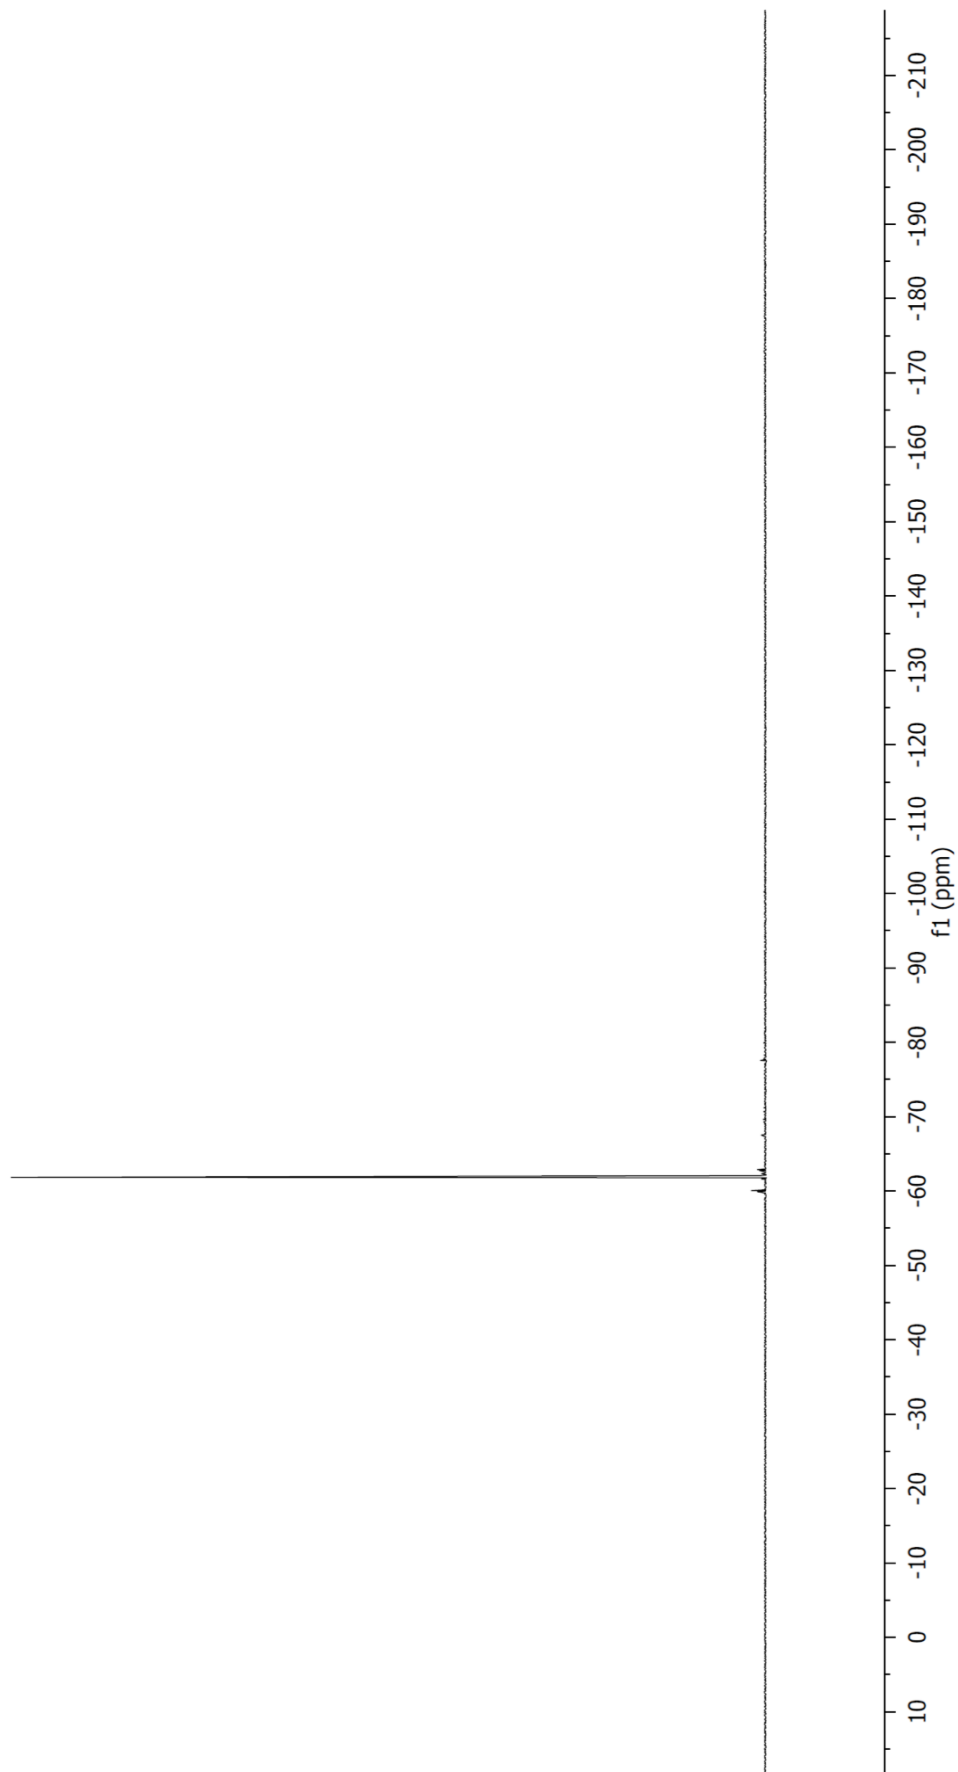

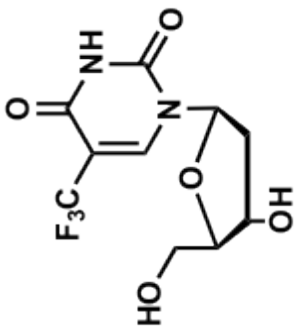

Compound 25  
1H NMR, 600 MHz

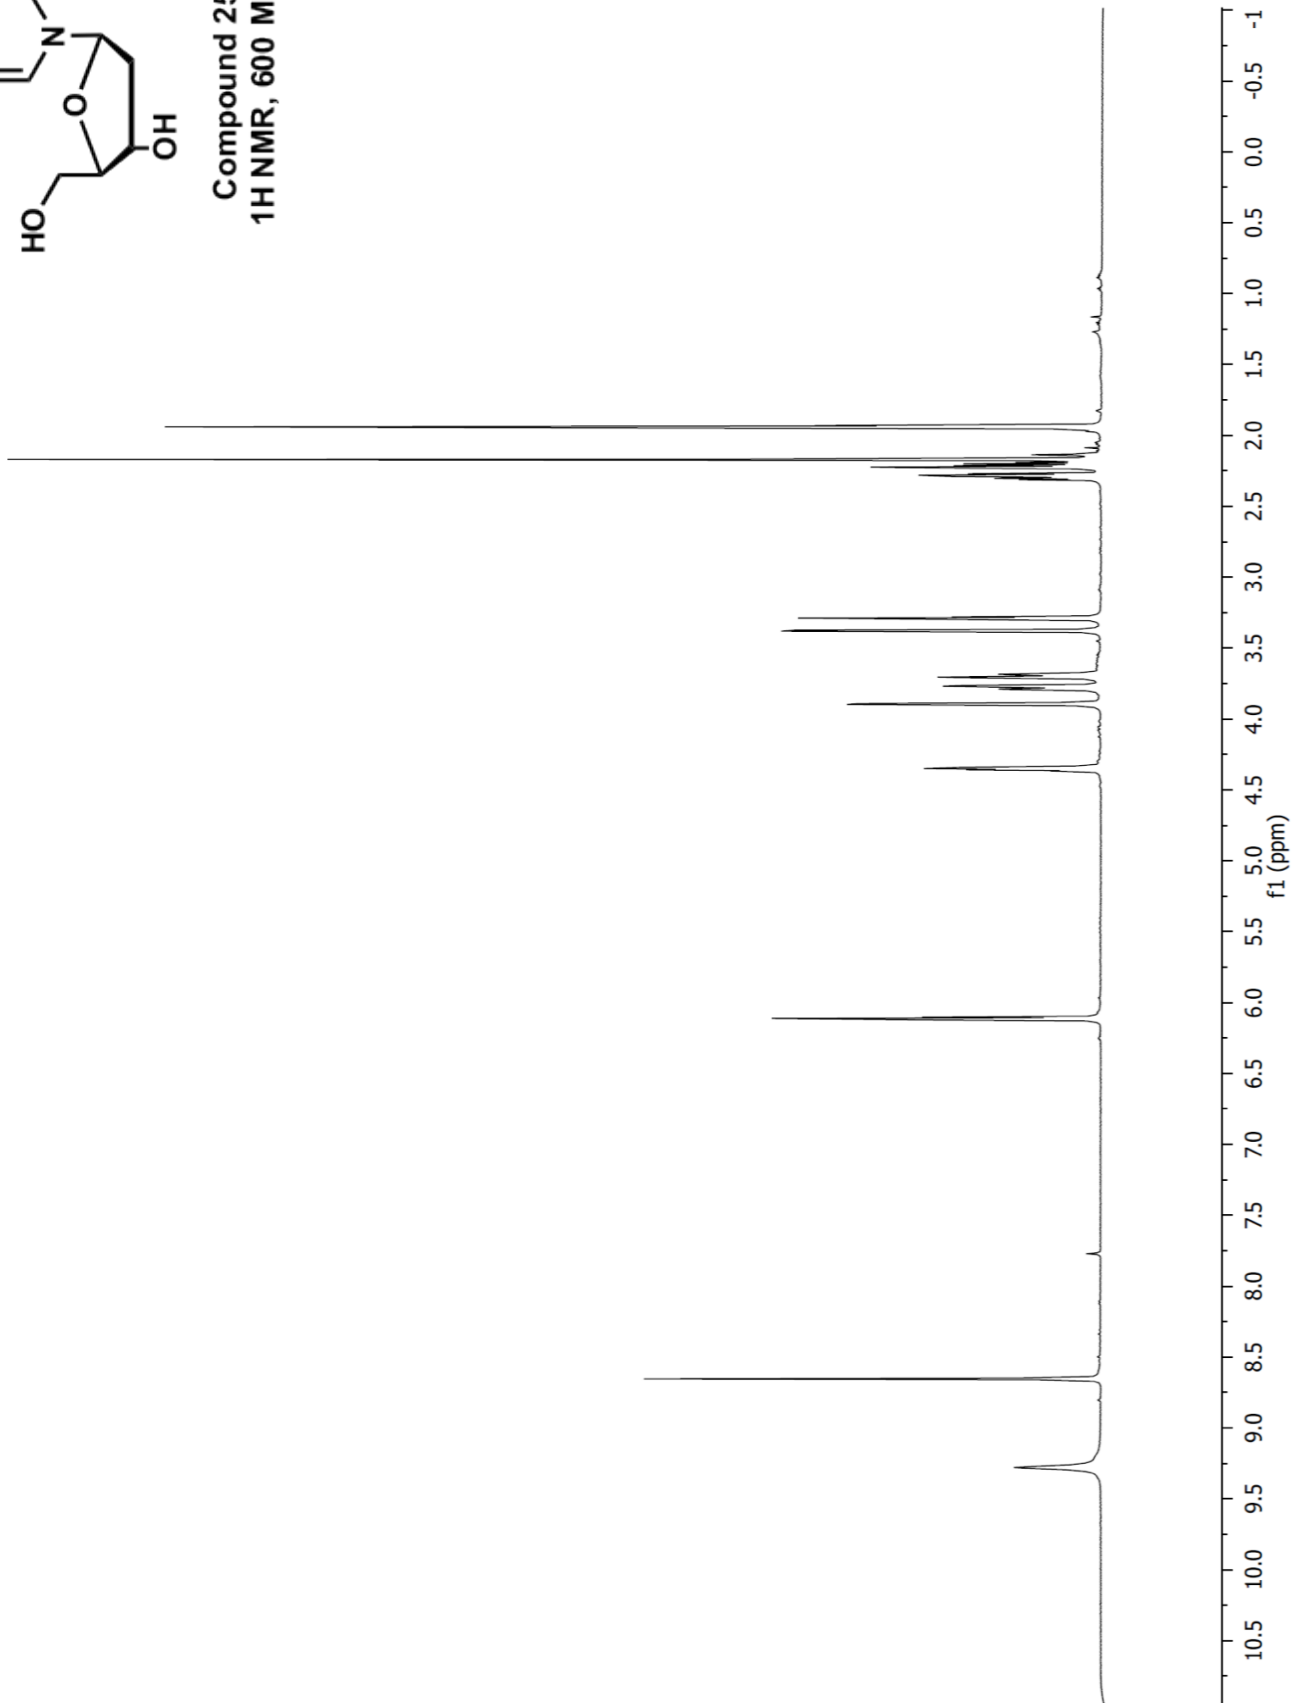

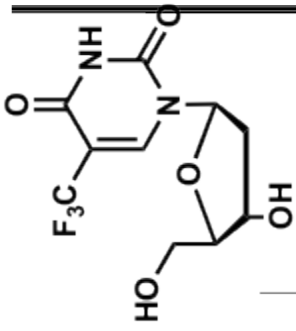

Compound 25  
 $^{13}C$  NMR, 150 MHz

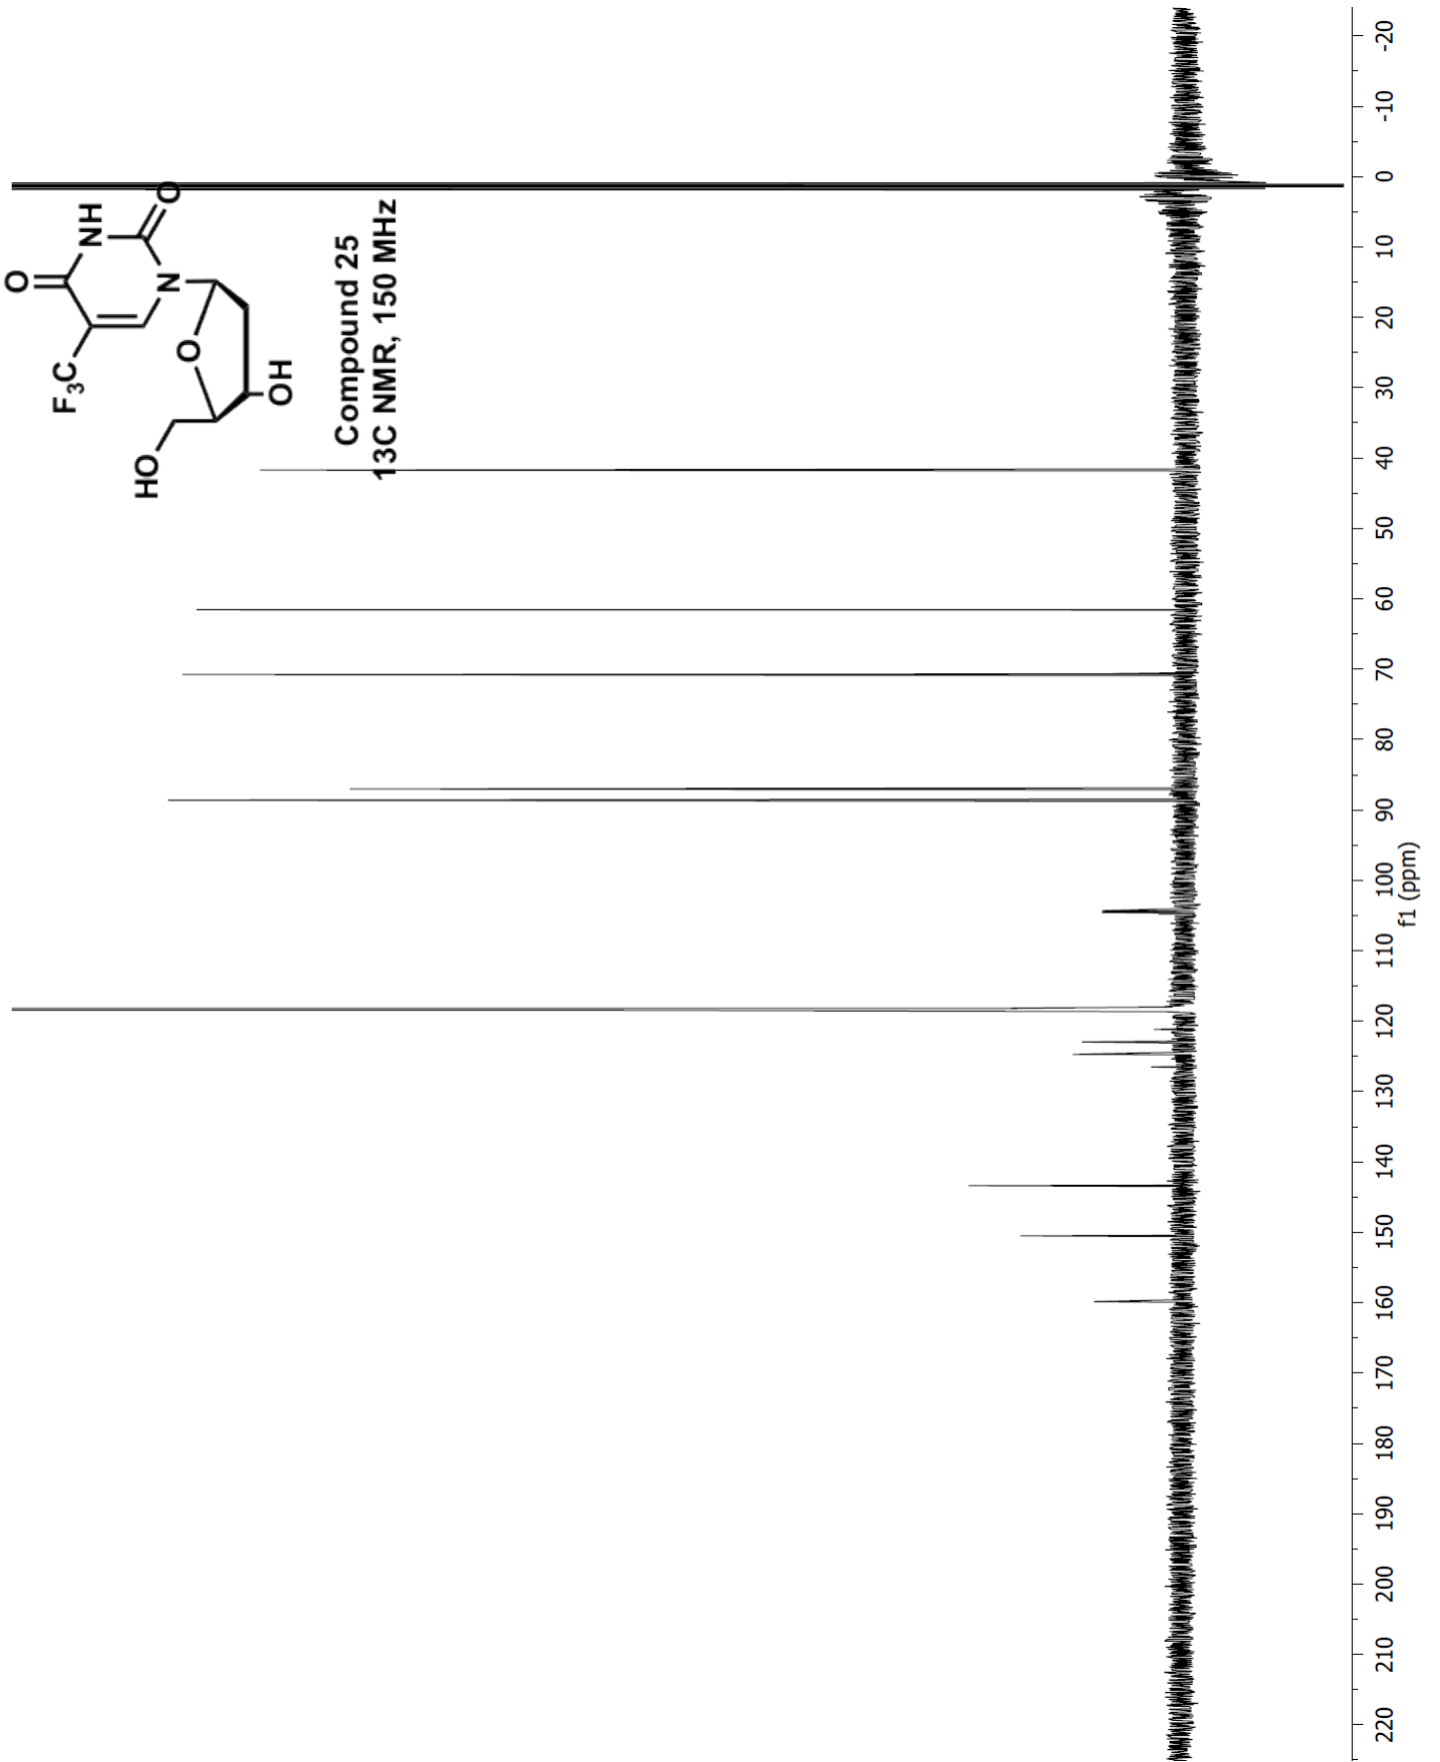

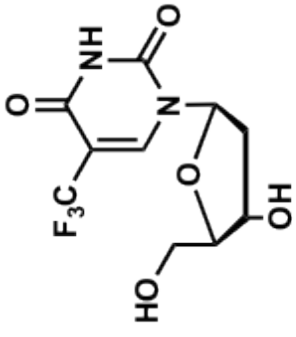

Compound 25  
19F NMR, 376 MHz

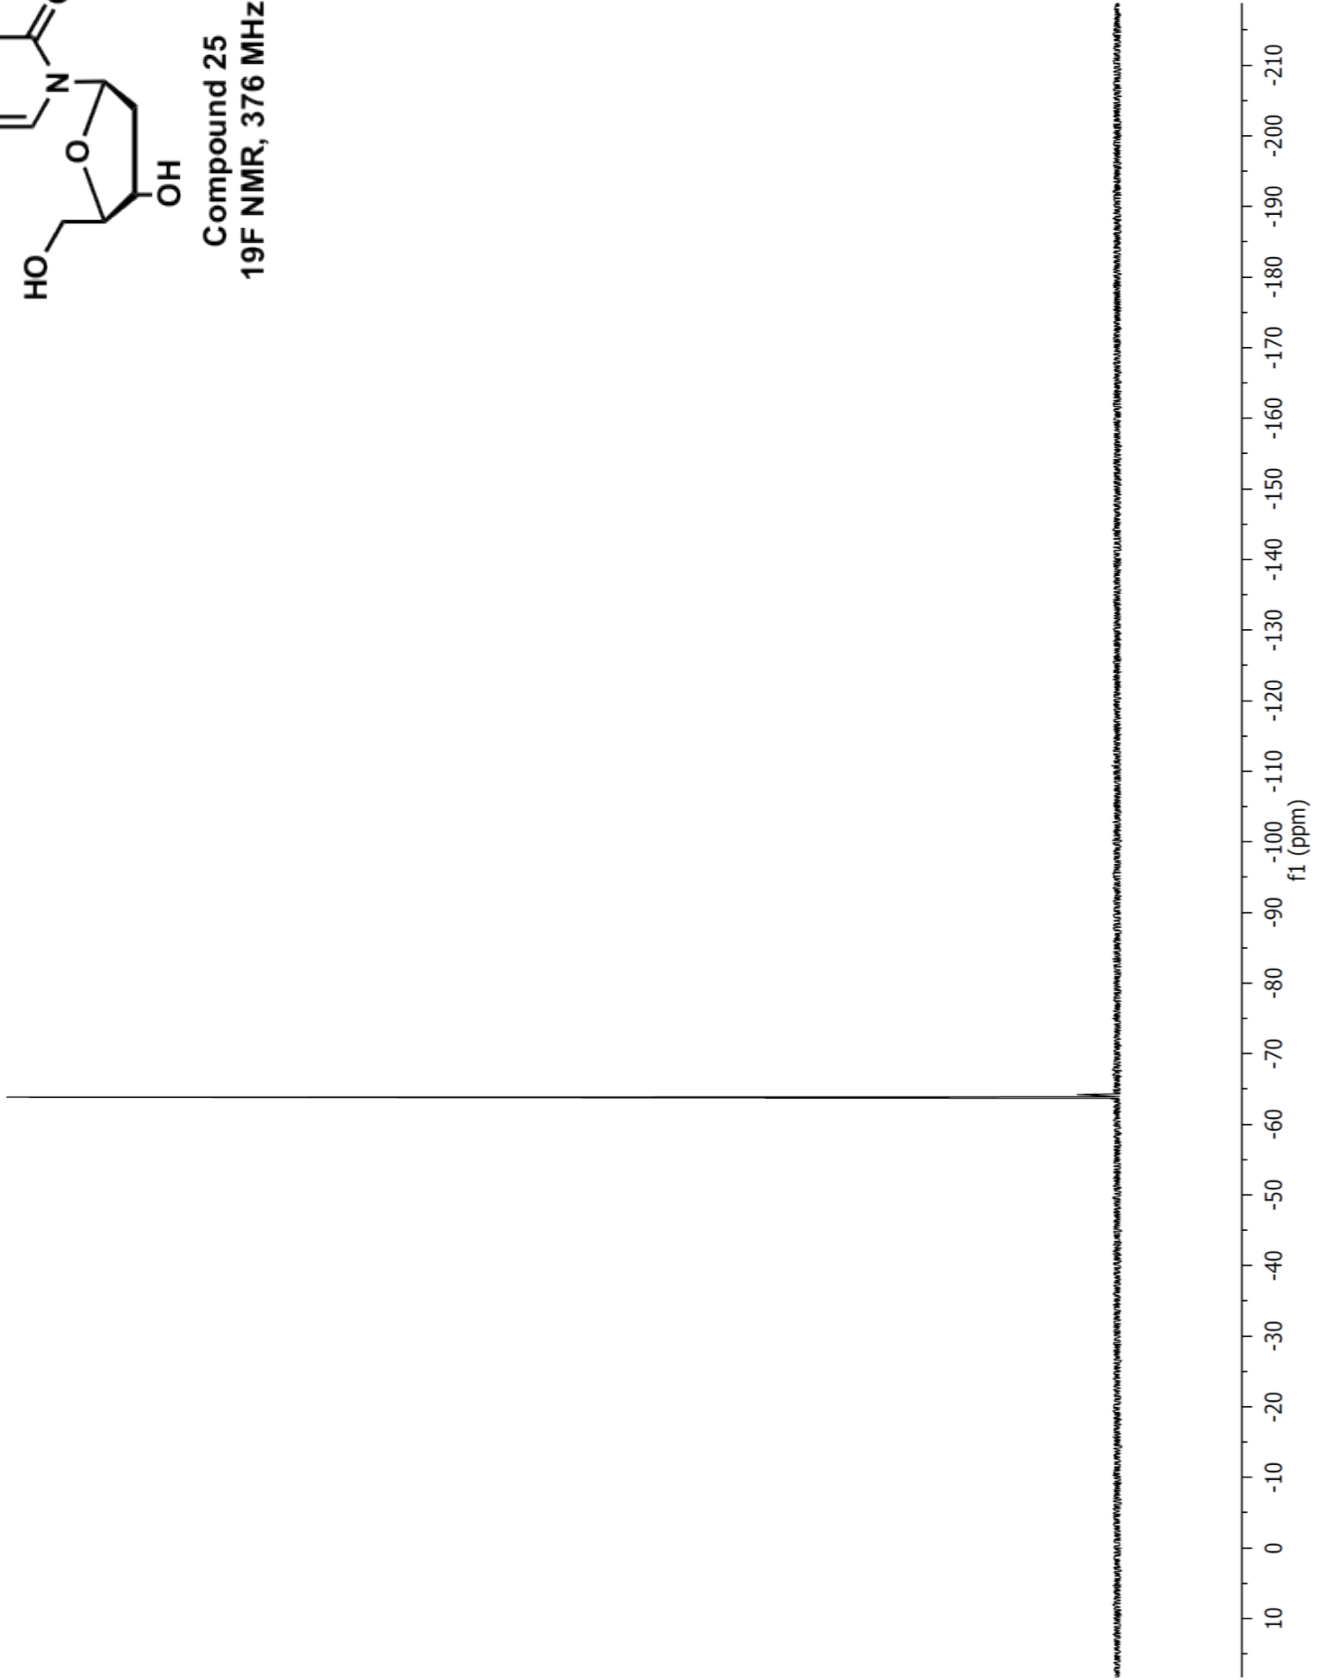

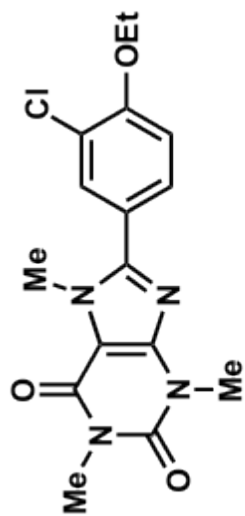

Compound 26  
1H NMR, 400 MHz

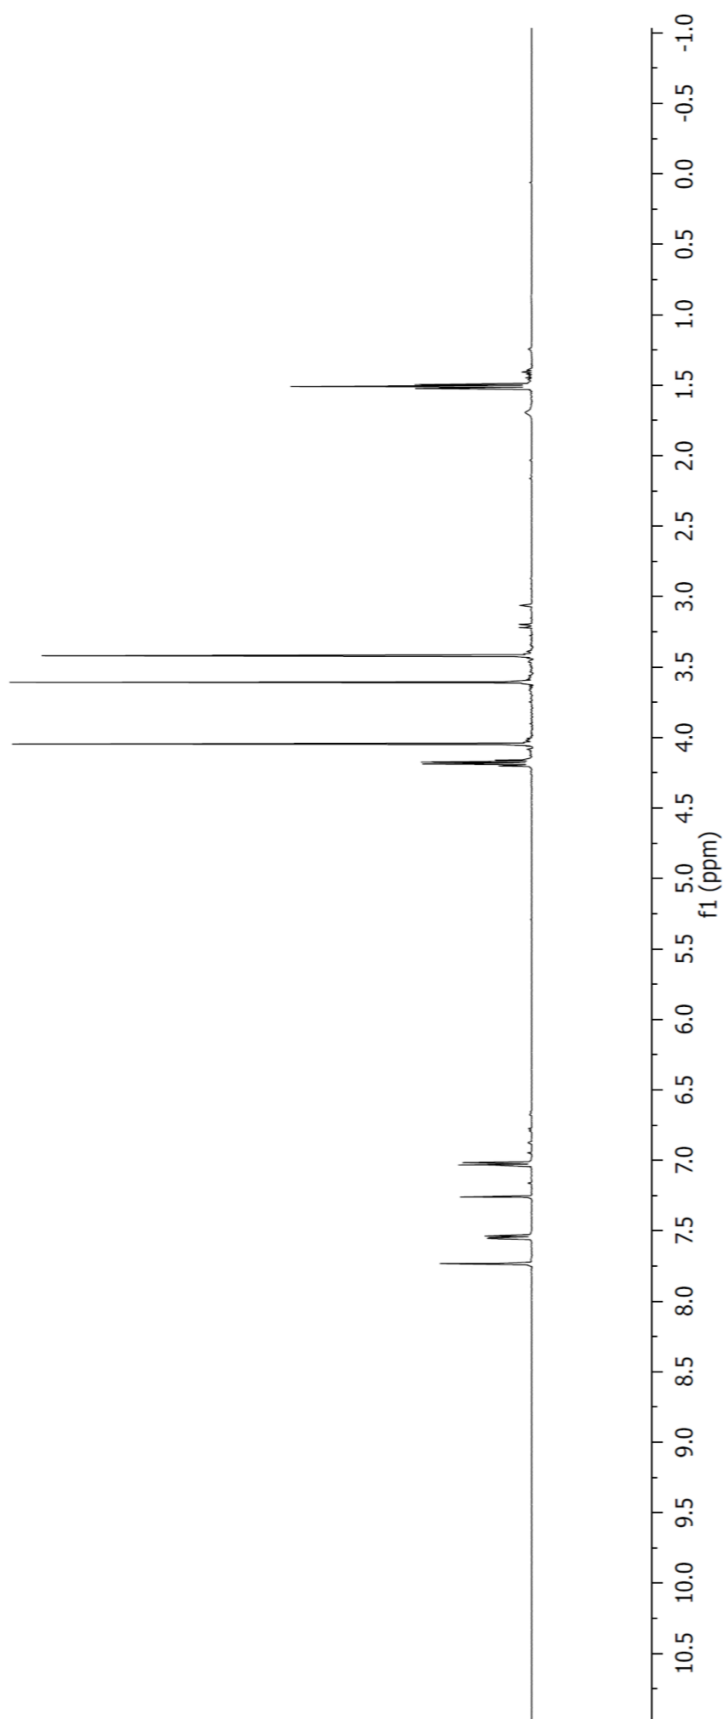

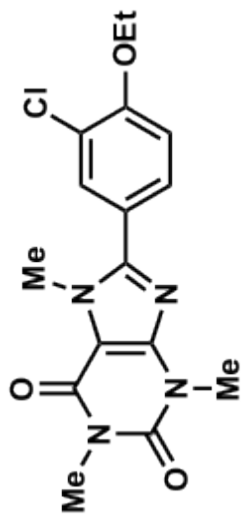

Compound 26  
13C NMR, 150 MHz

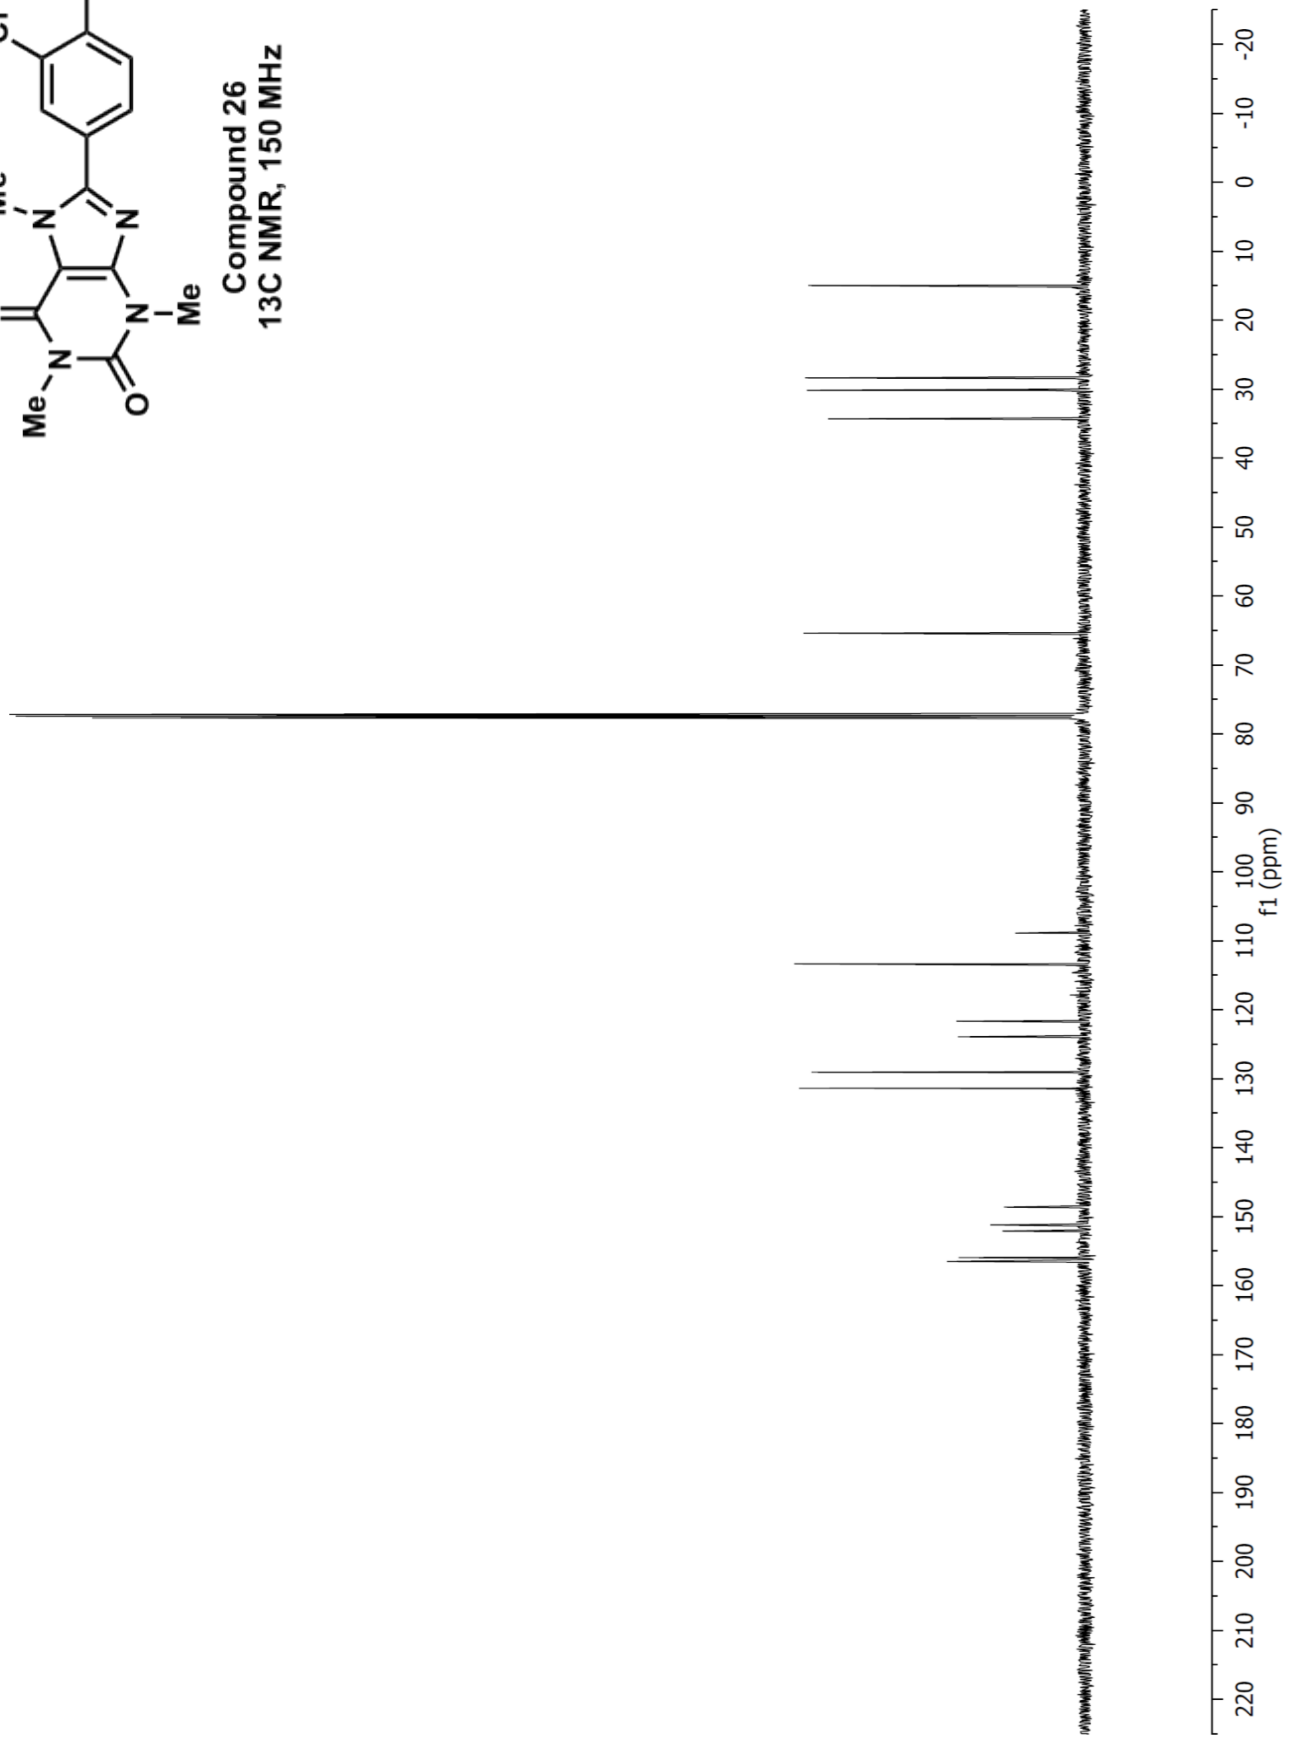



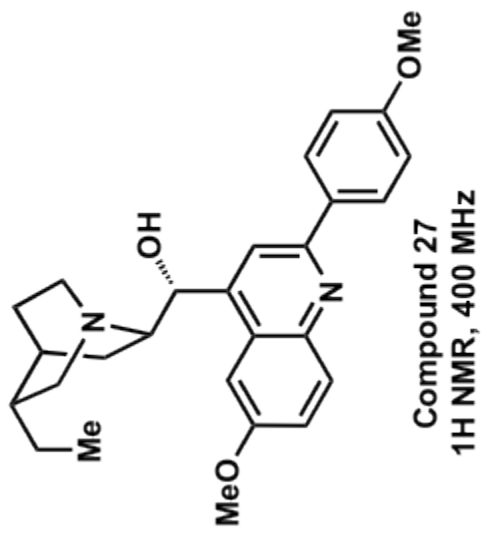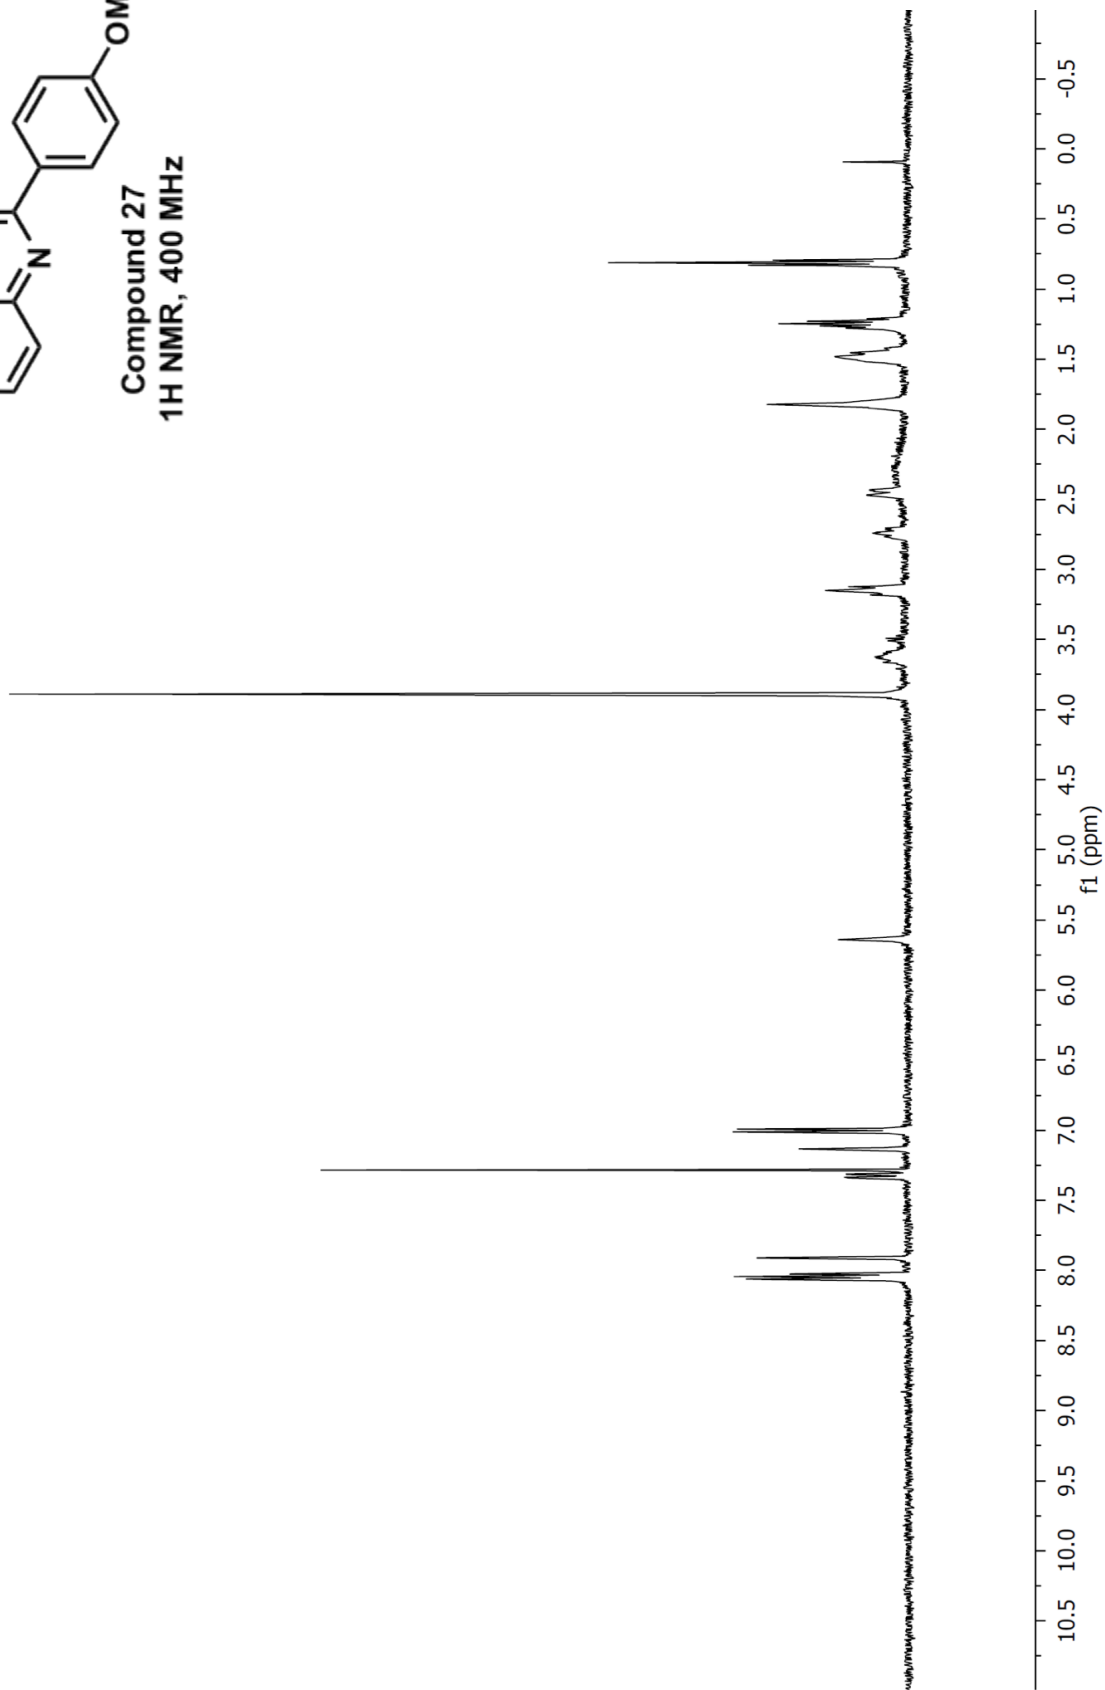

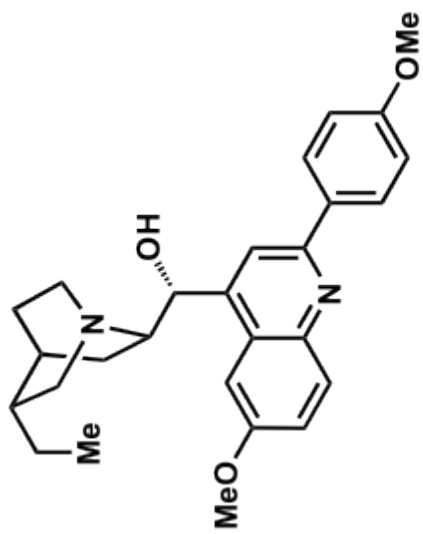

Compound 27  
13C NMR, 150 MHz

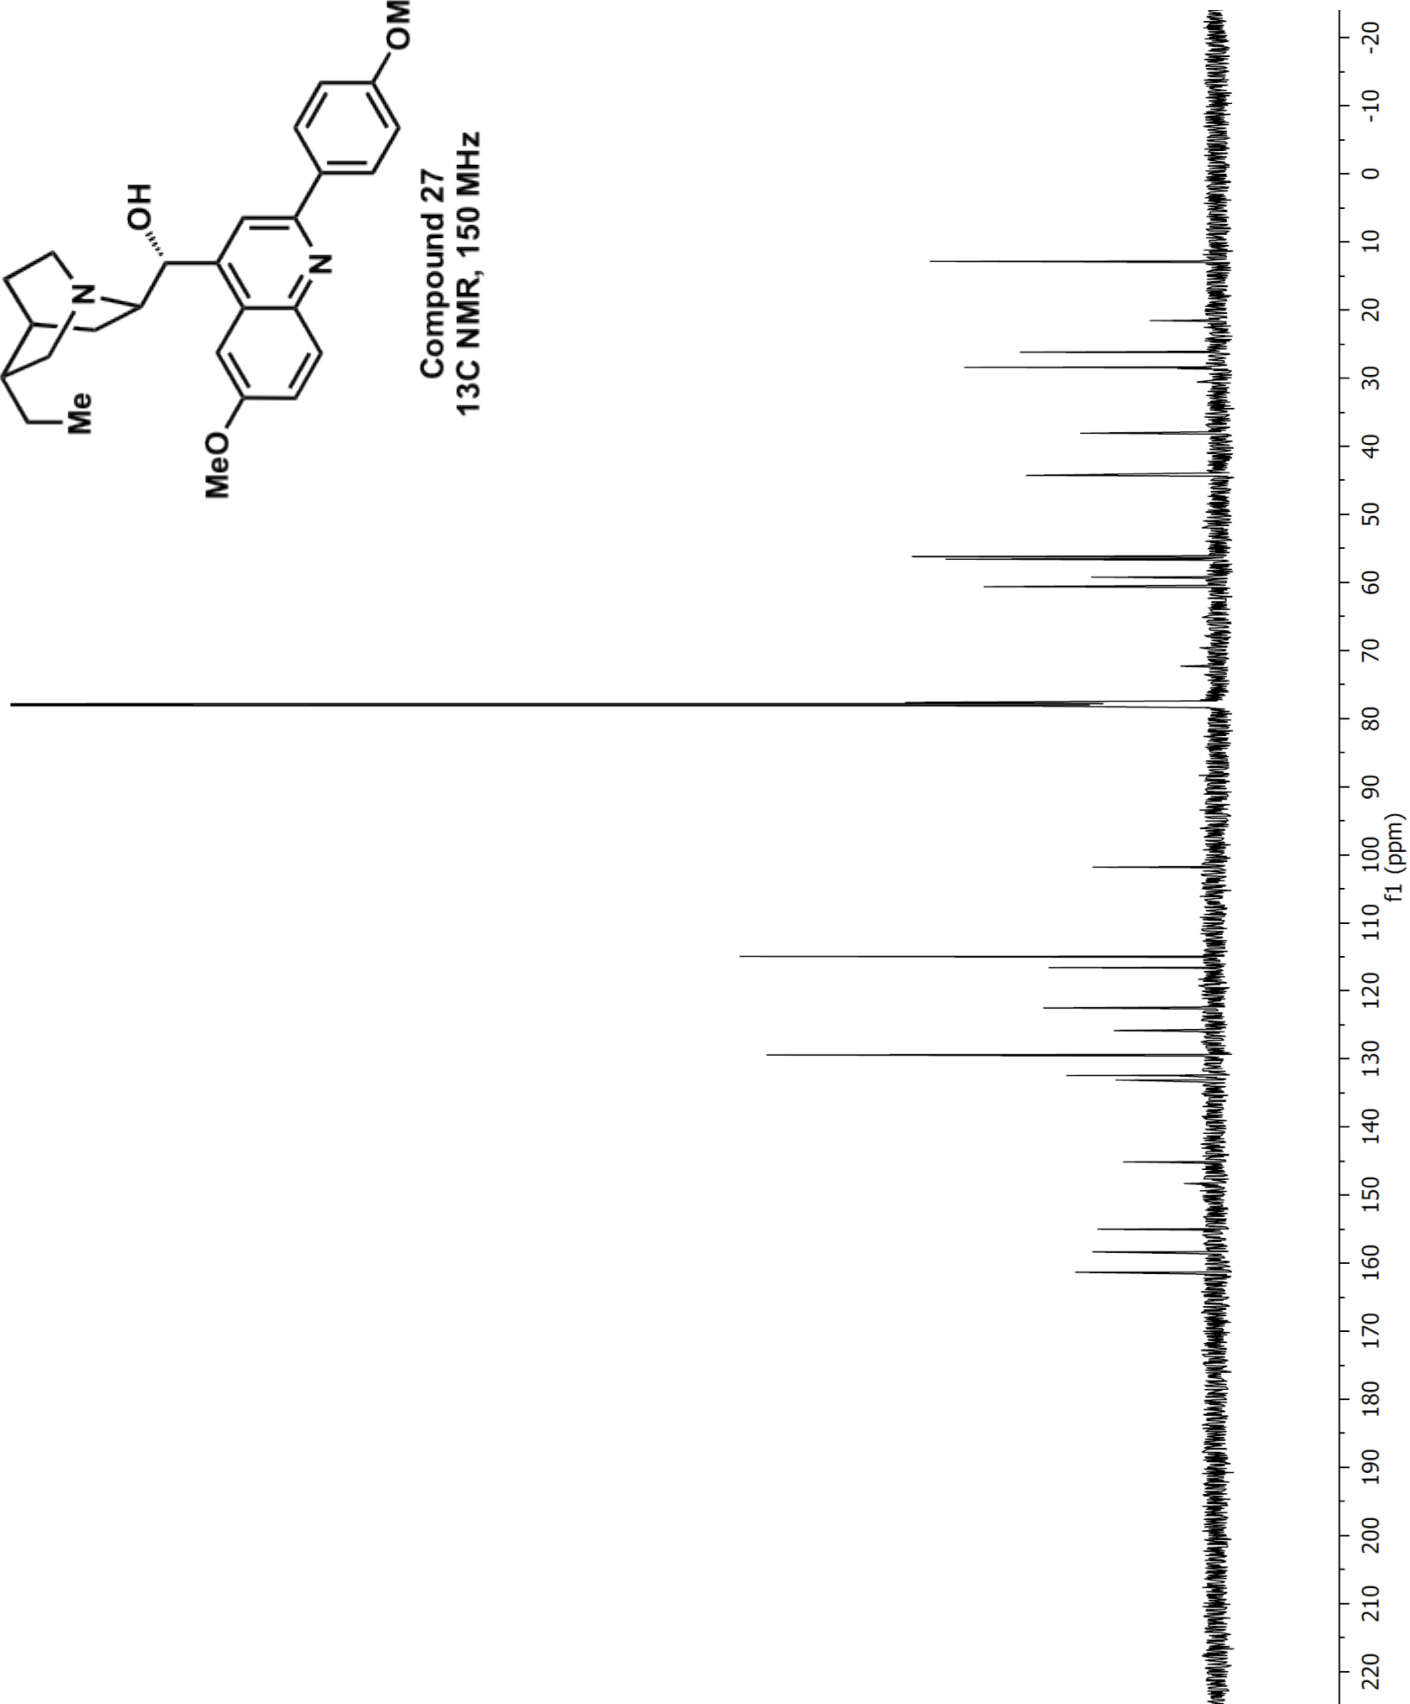

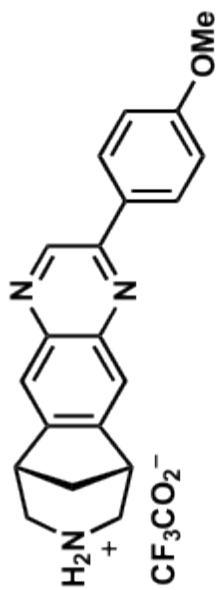

Compound 28•TFA  
1H NMR, 400 MHz

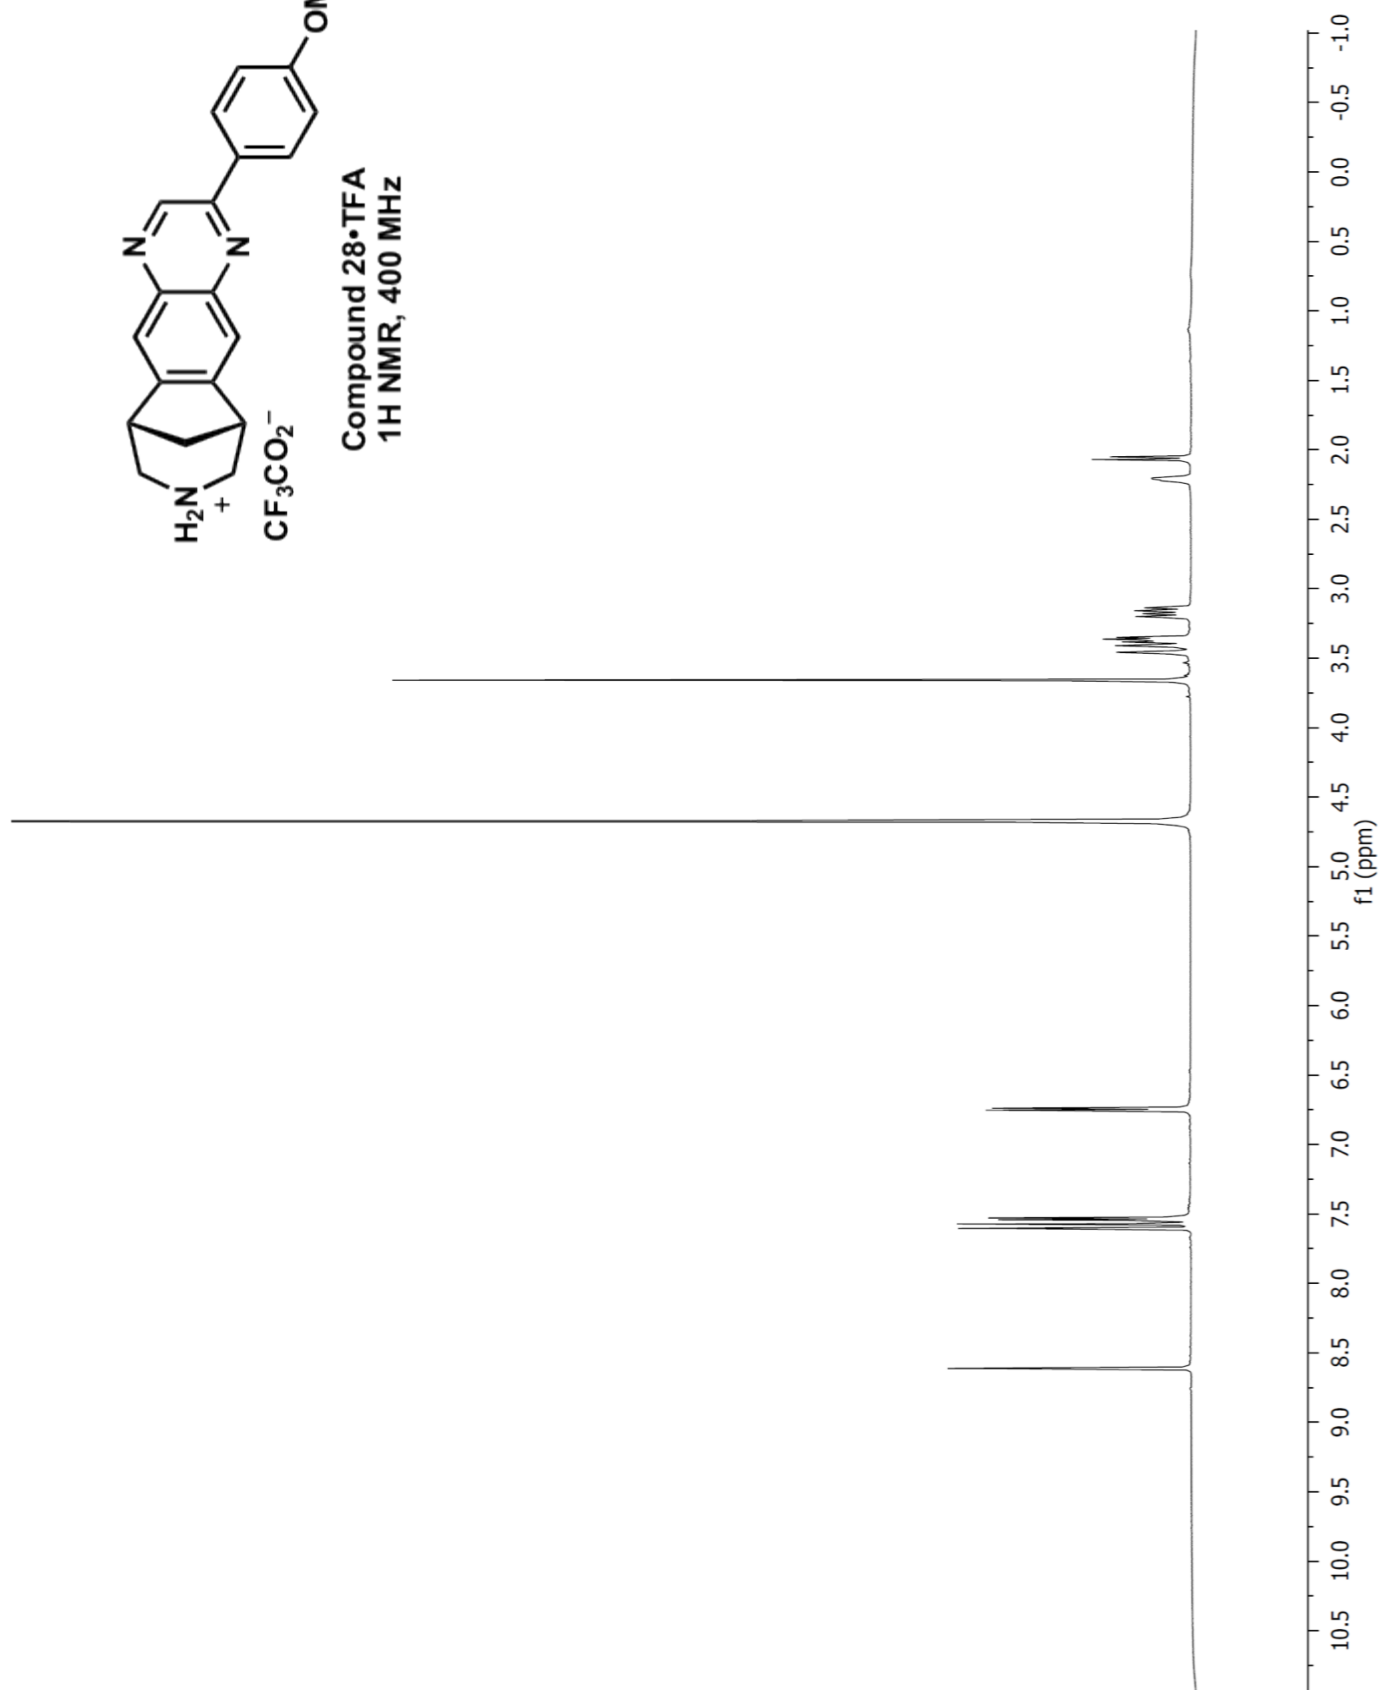

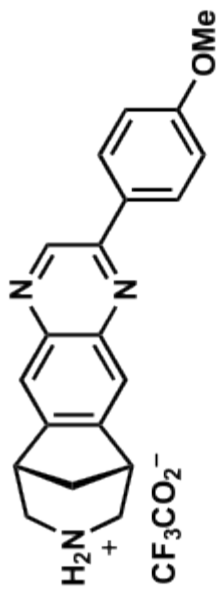

Compound 28•TFA  
13C NMR, 150 MHz

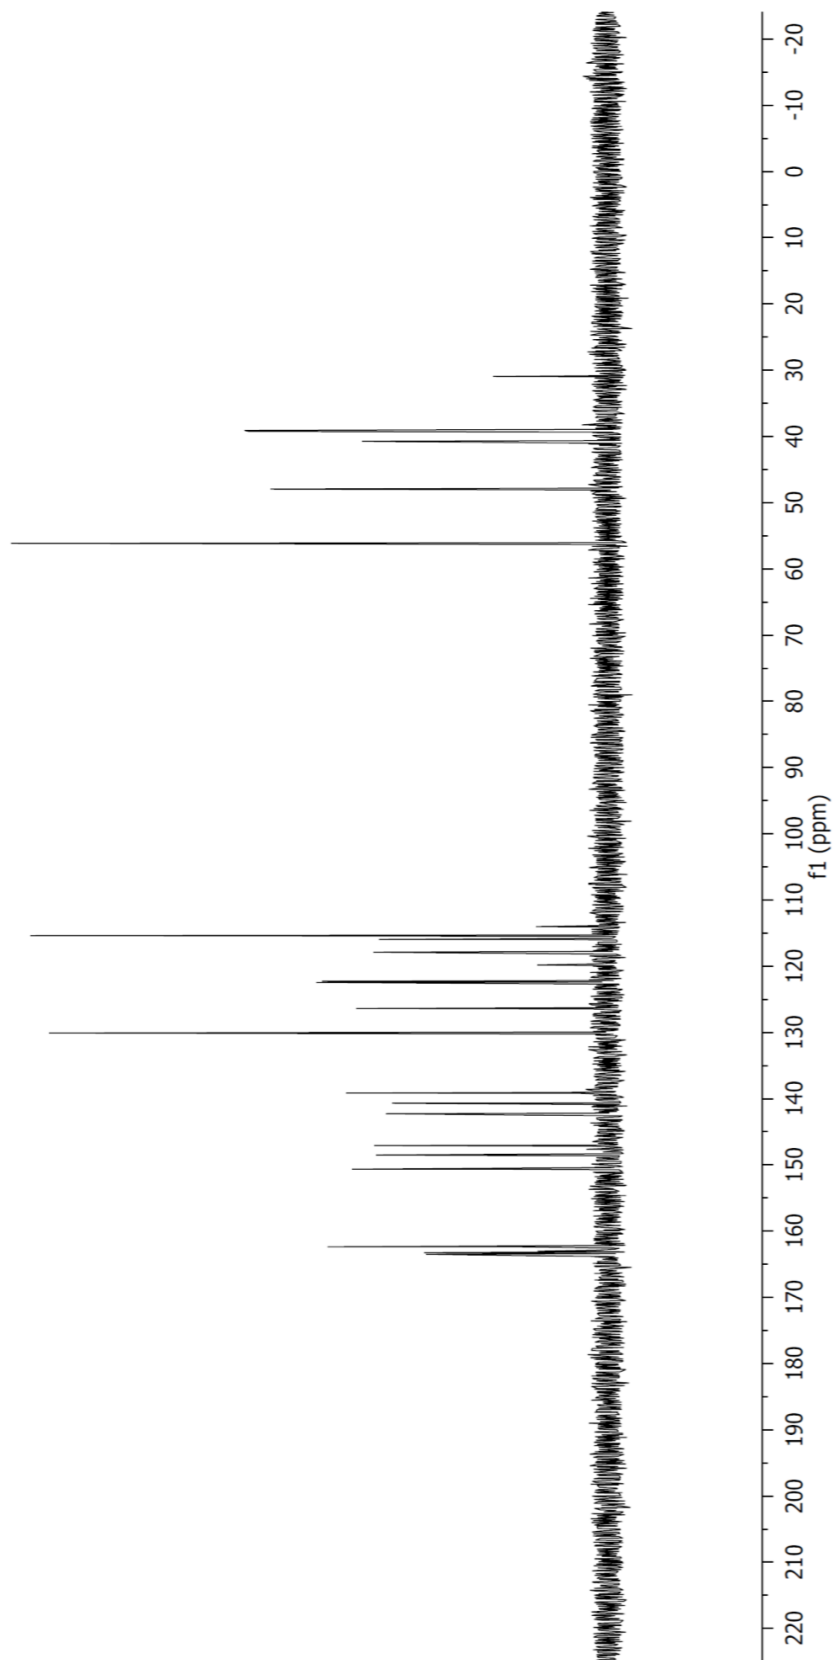

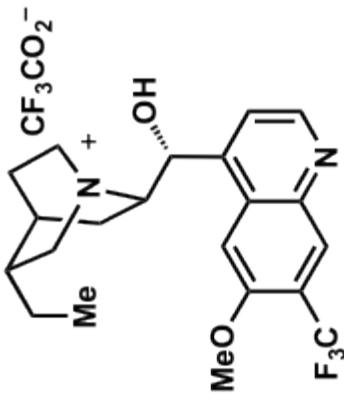

Compound 29•TFA  
1H NMR, 400 MHz

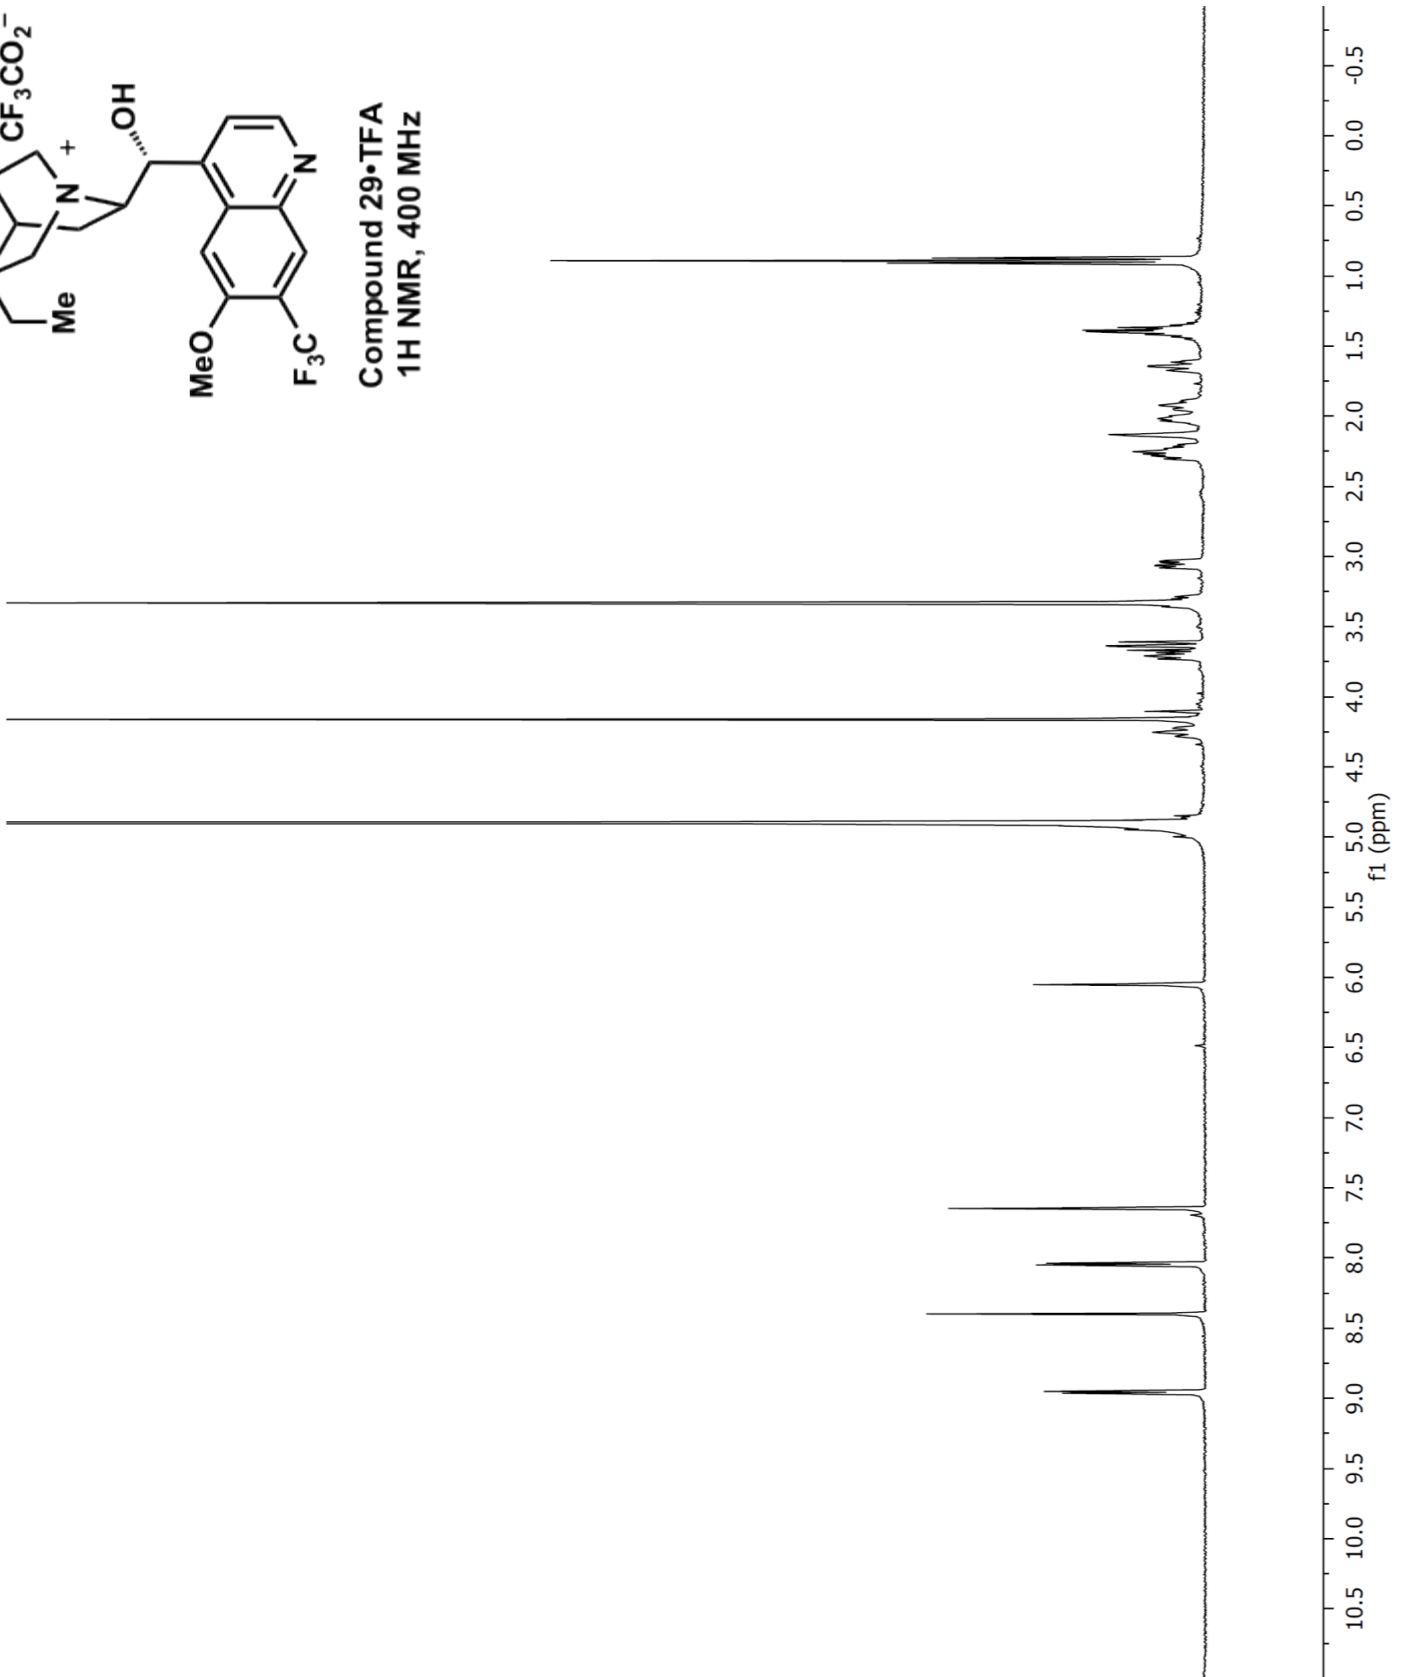

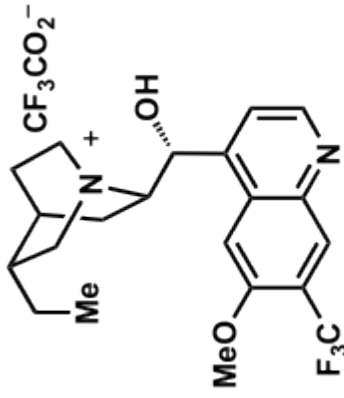

Compound 29•TFA  
13C NMR, 150 MHz

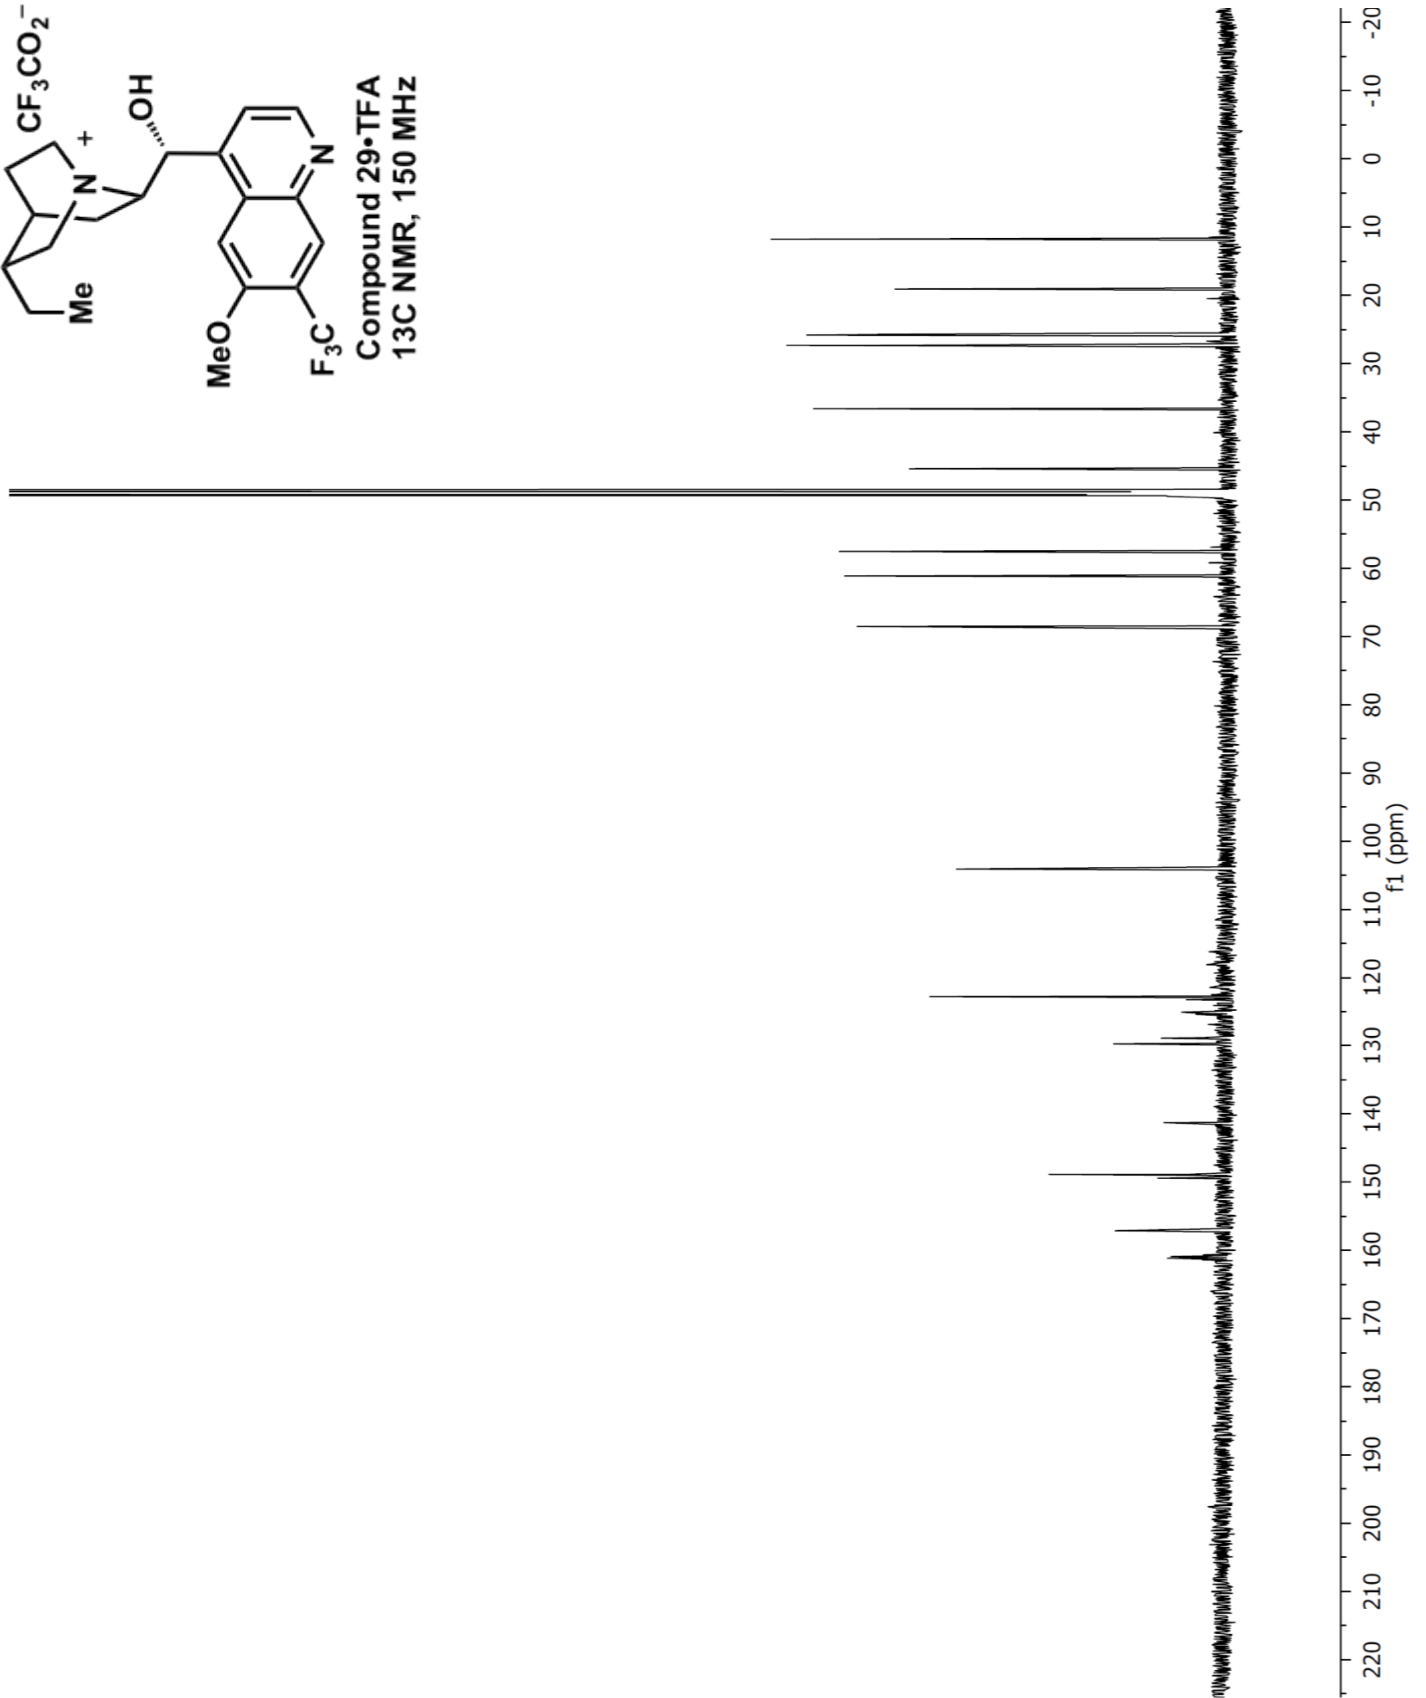

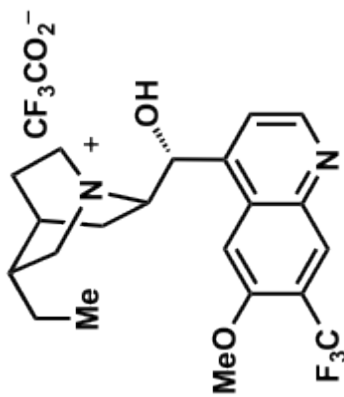

Compound 29•TFA  
19F NMR, 376 MHz

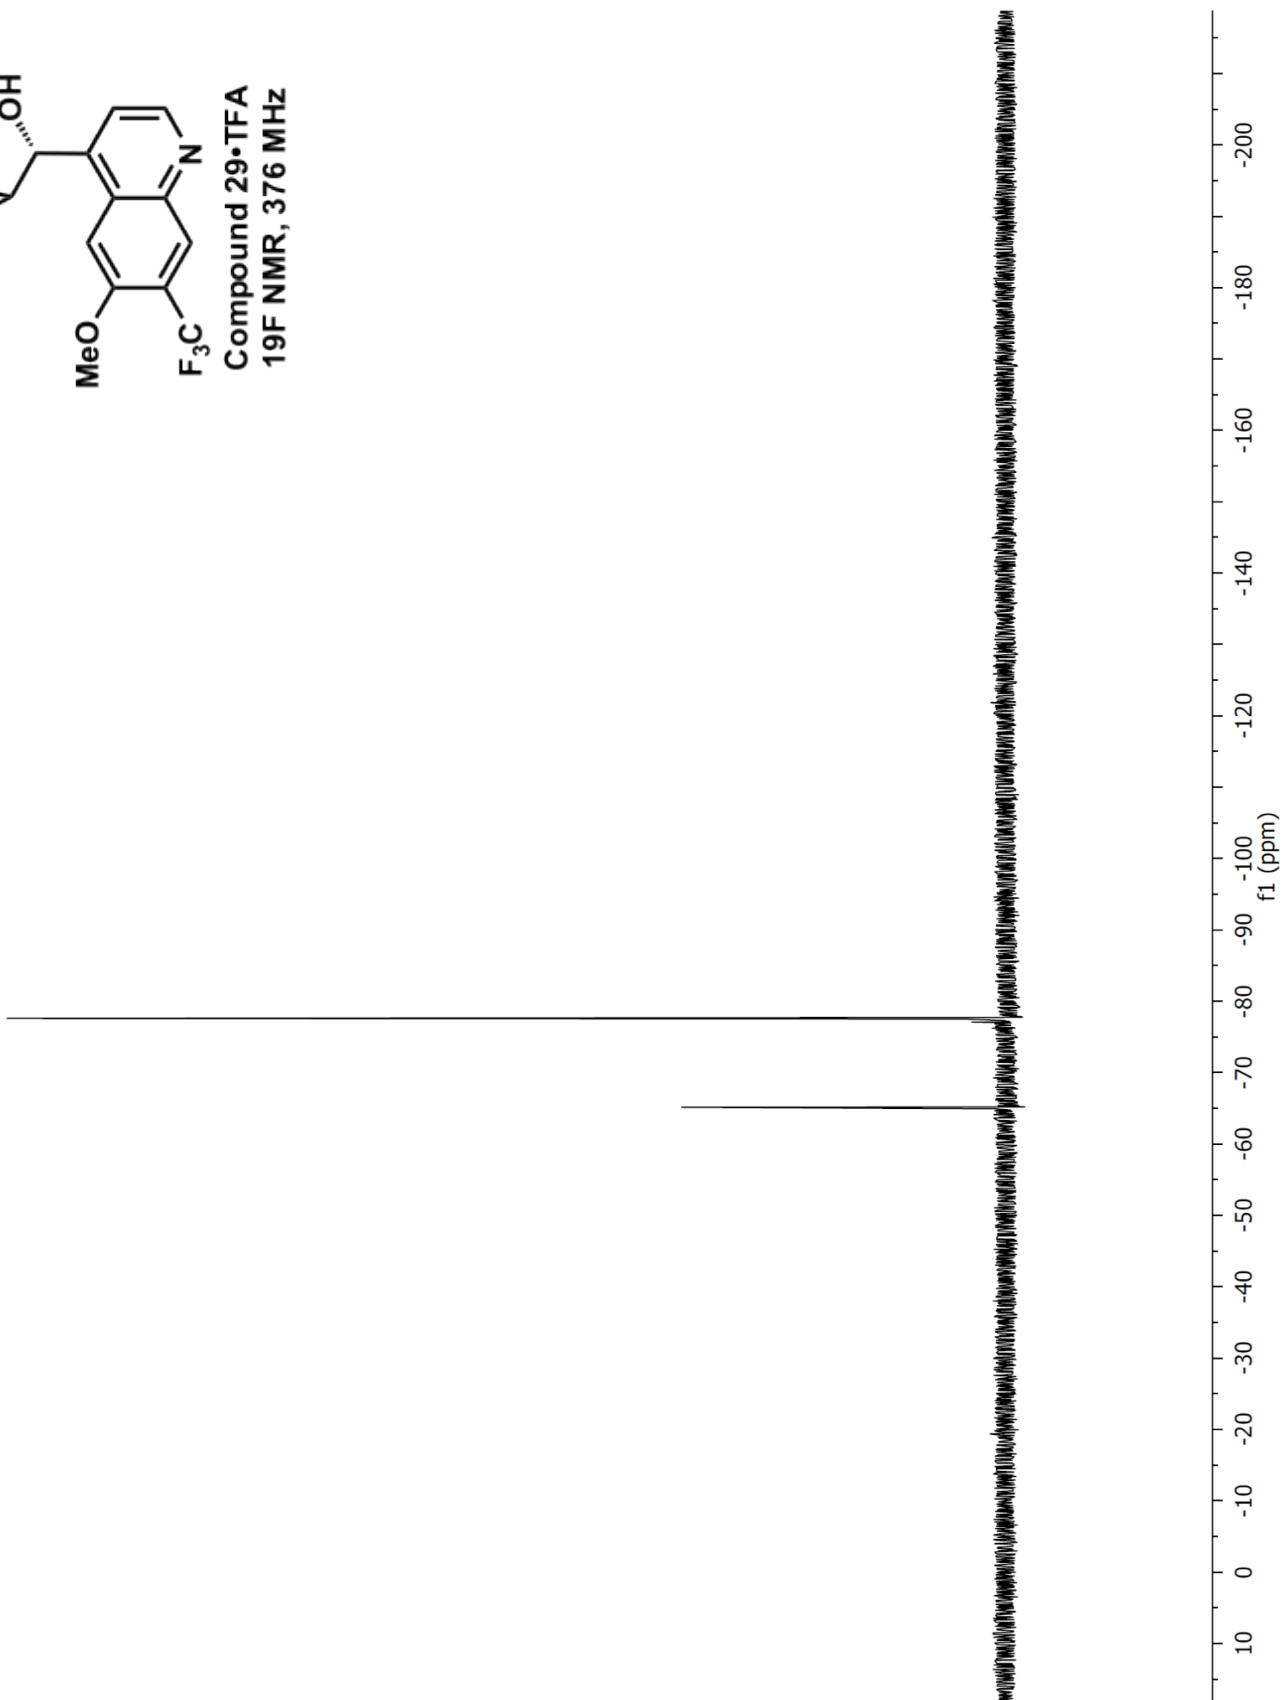

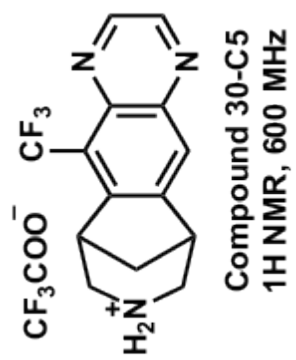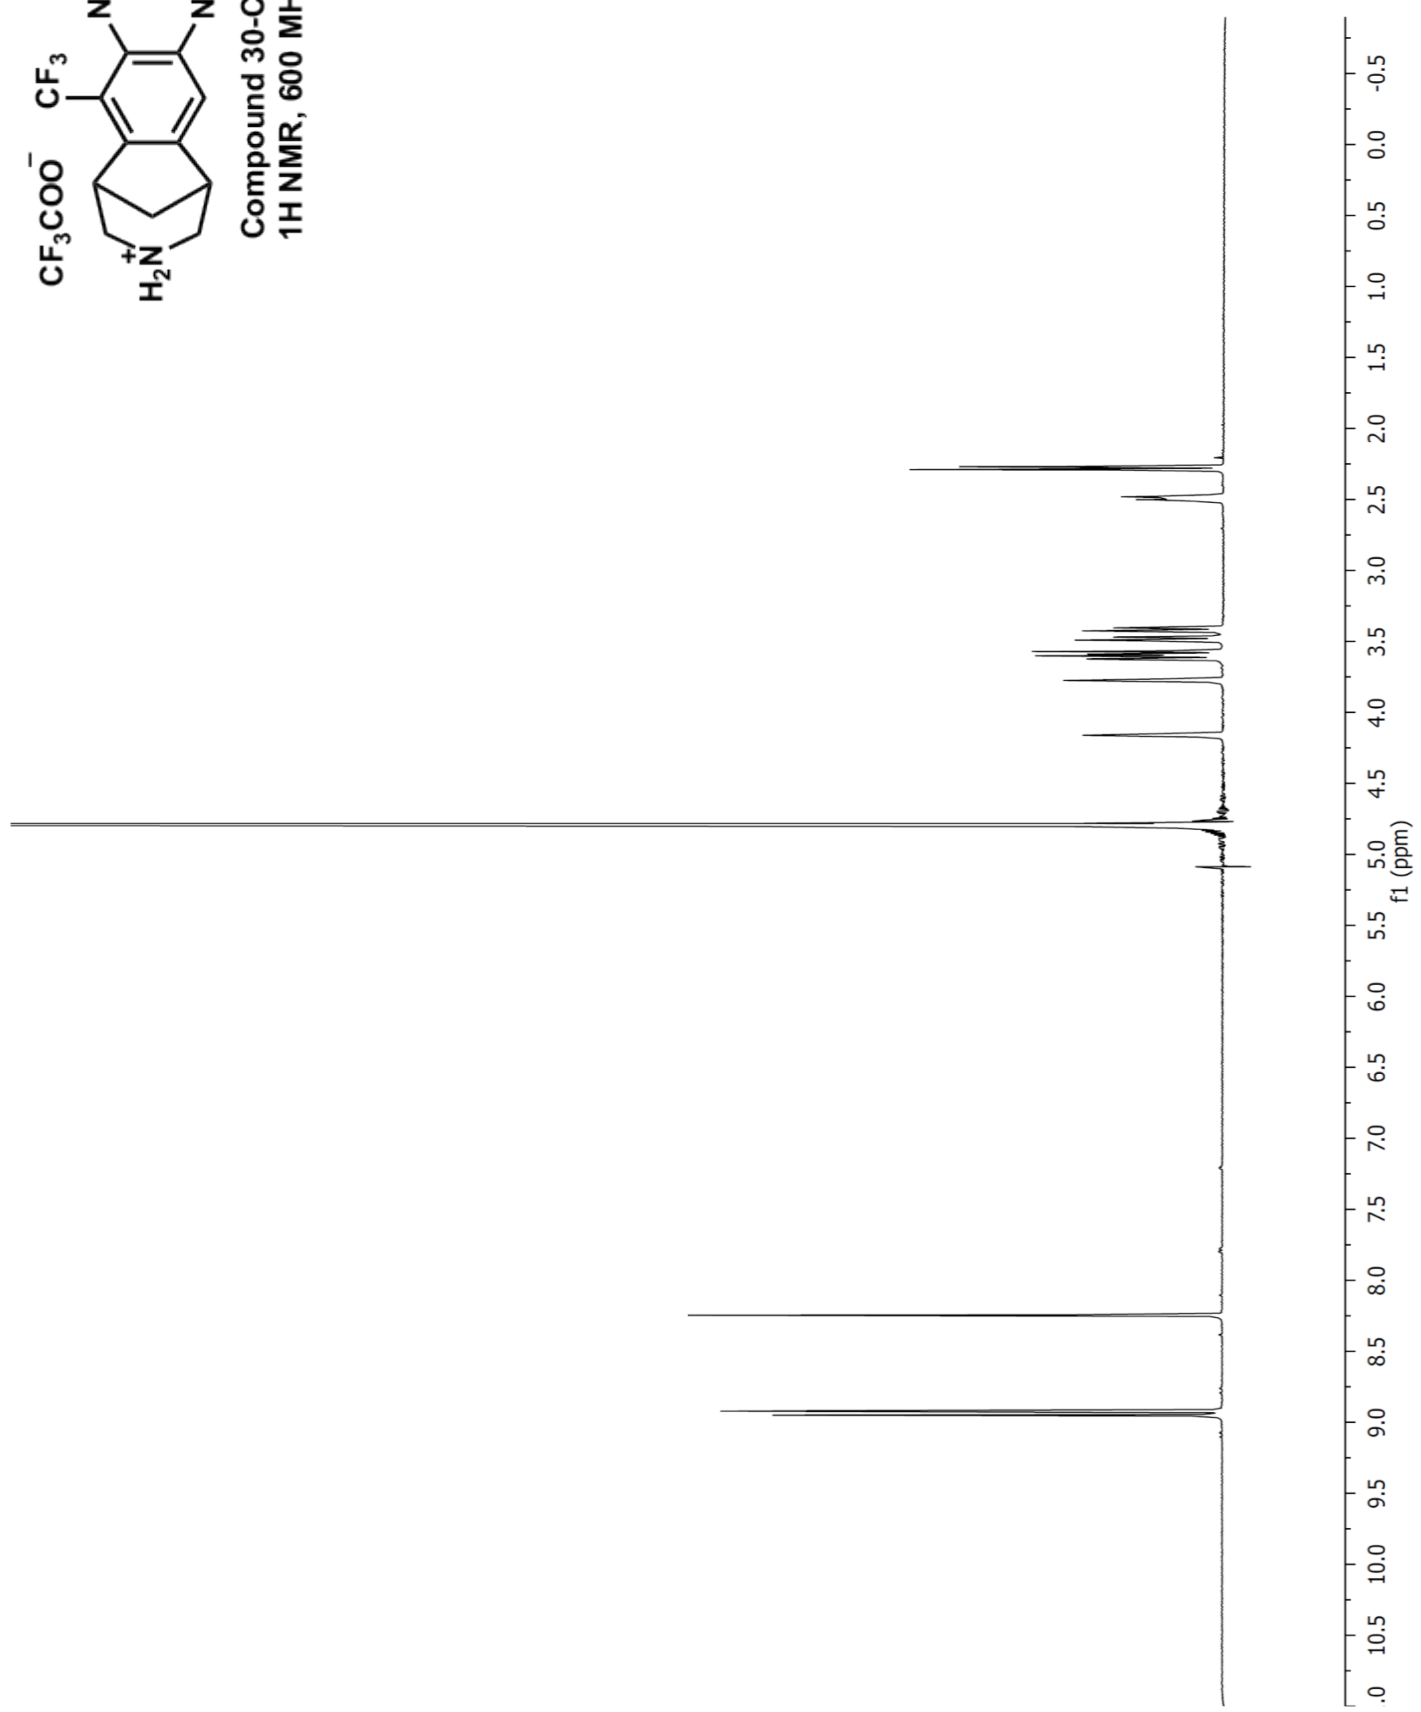



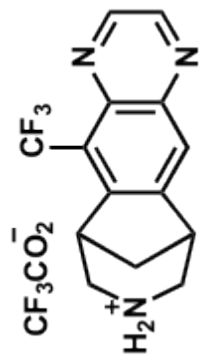

Compound 30-C5  
13C NMR, 150 MHz

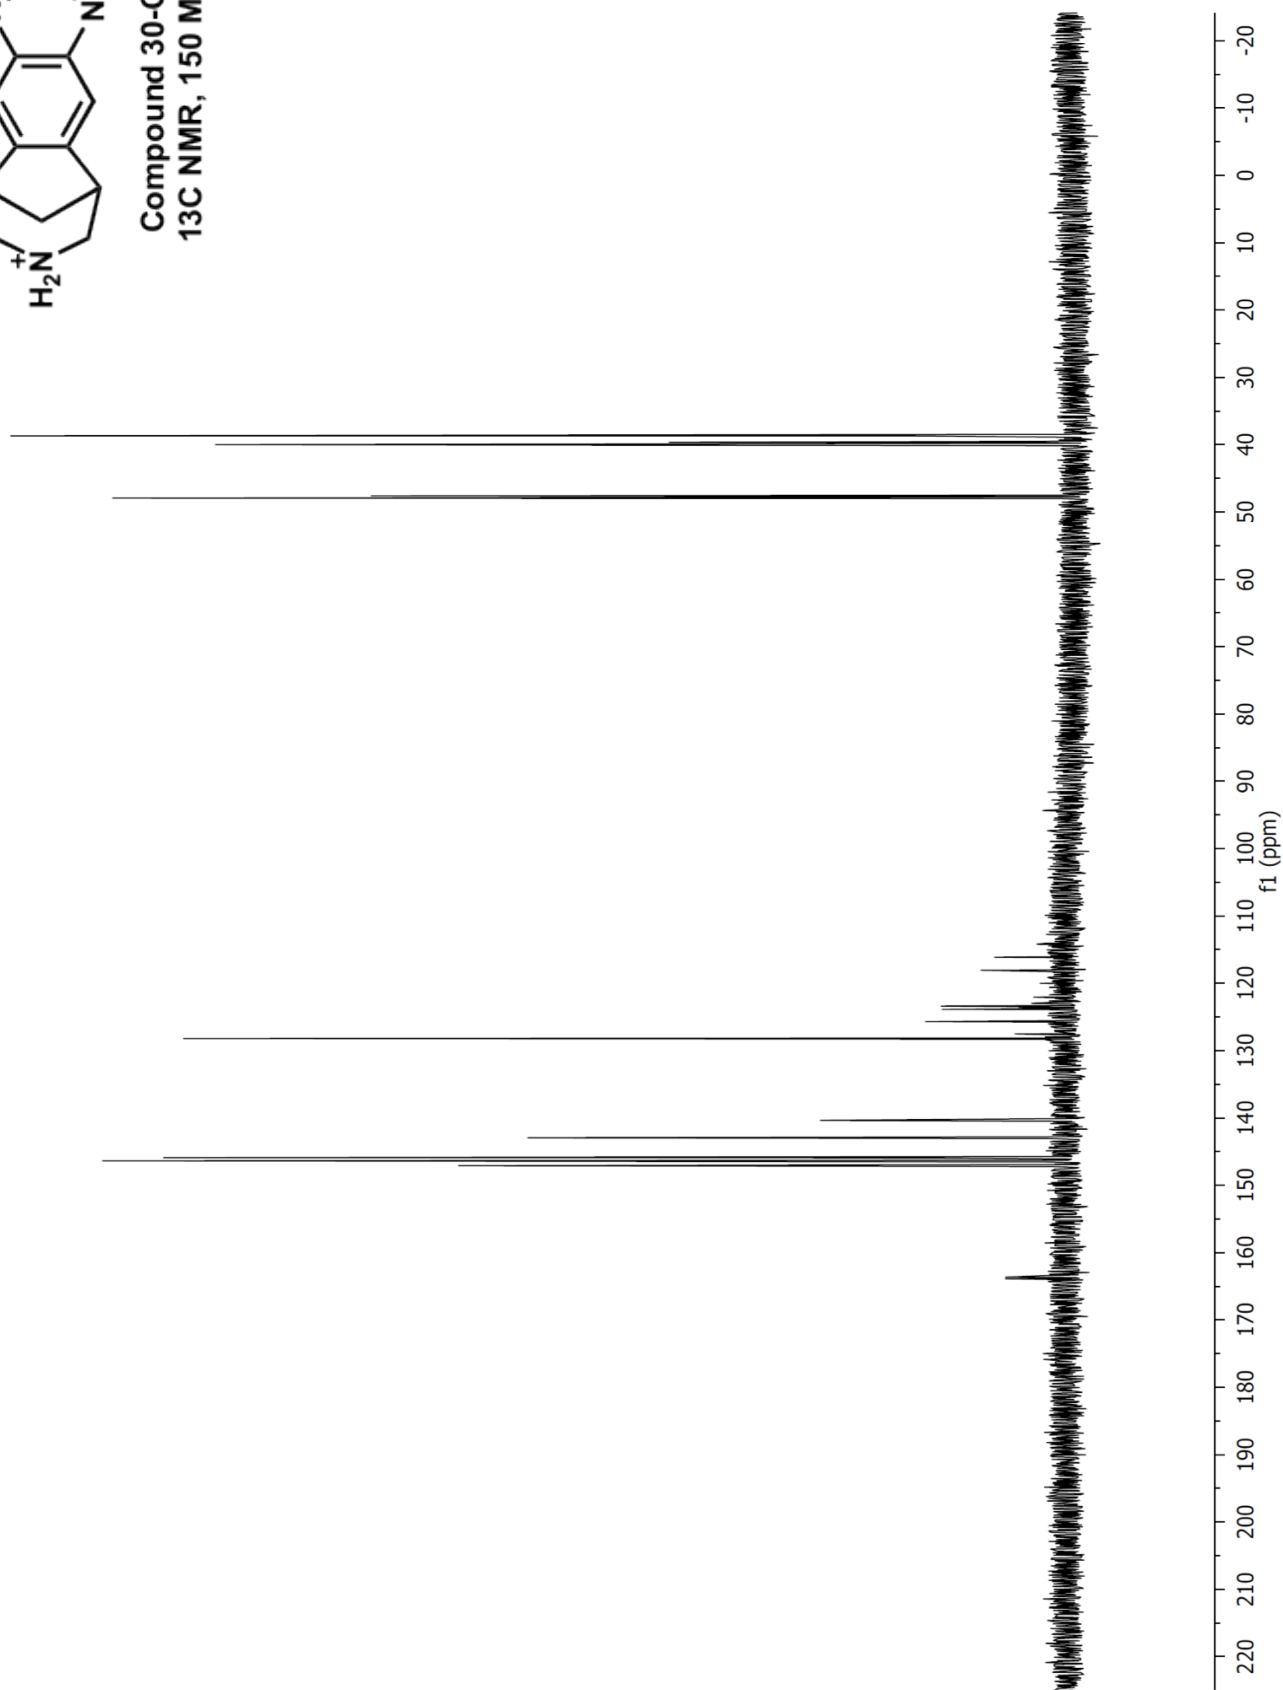

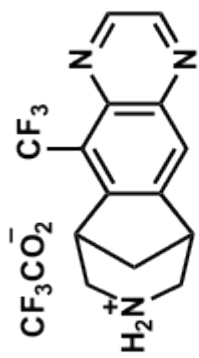

Compound 30-C5  
19F NMR, 376 MHz

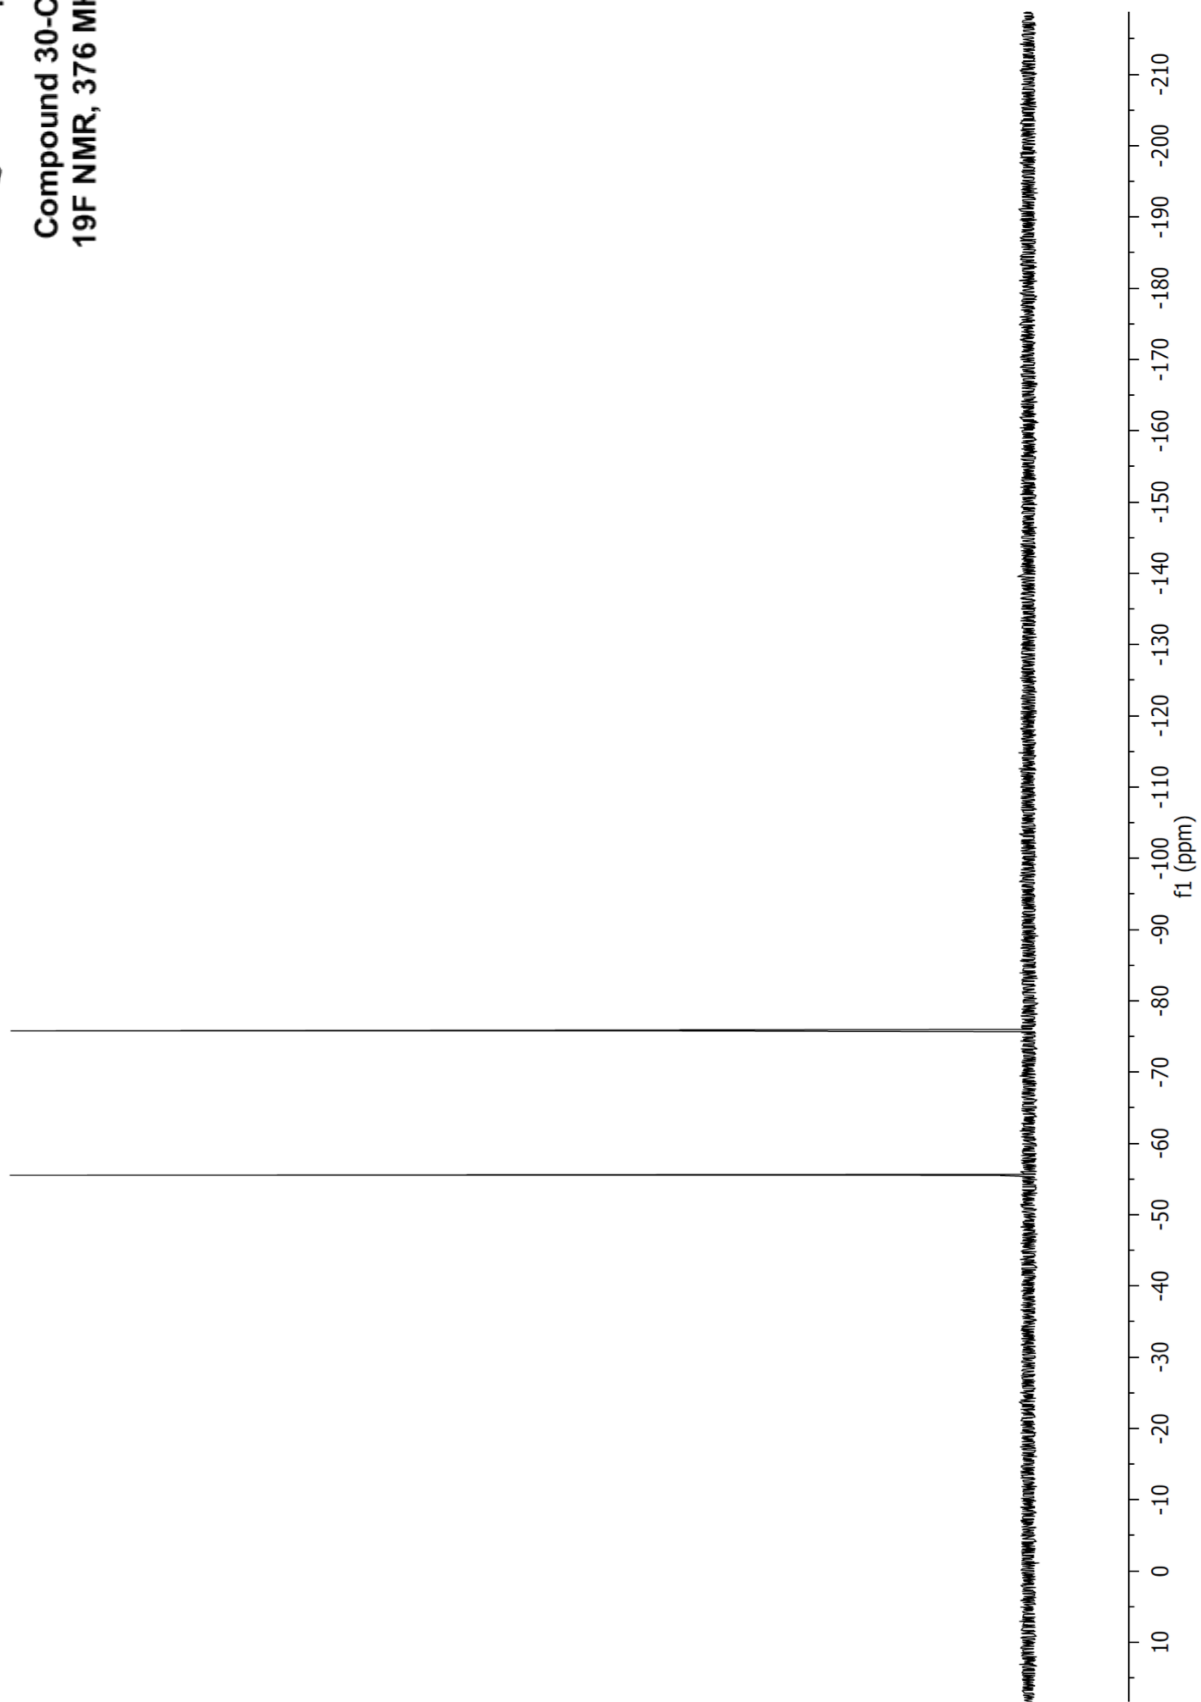

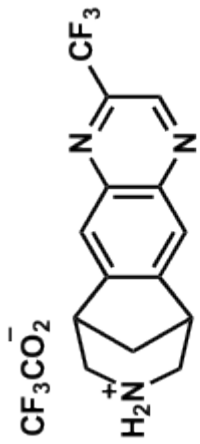

Compound 30-C2  
1H NMR, 600 MHz

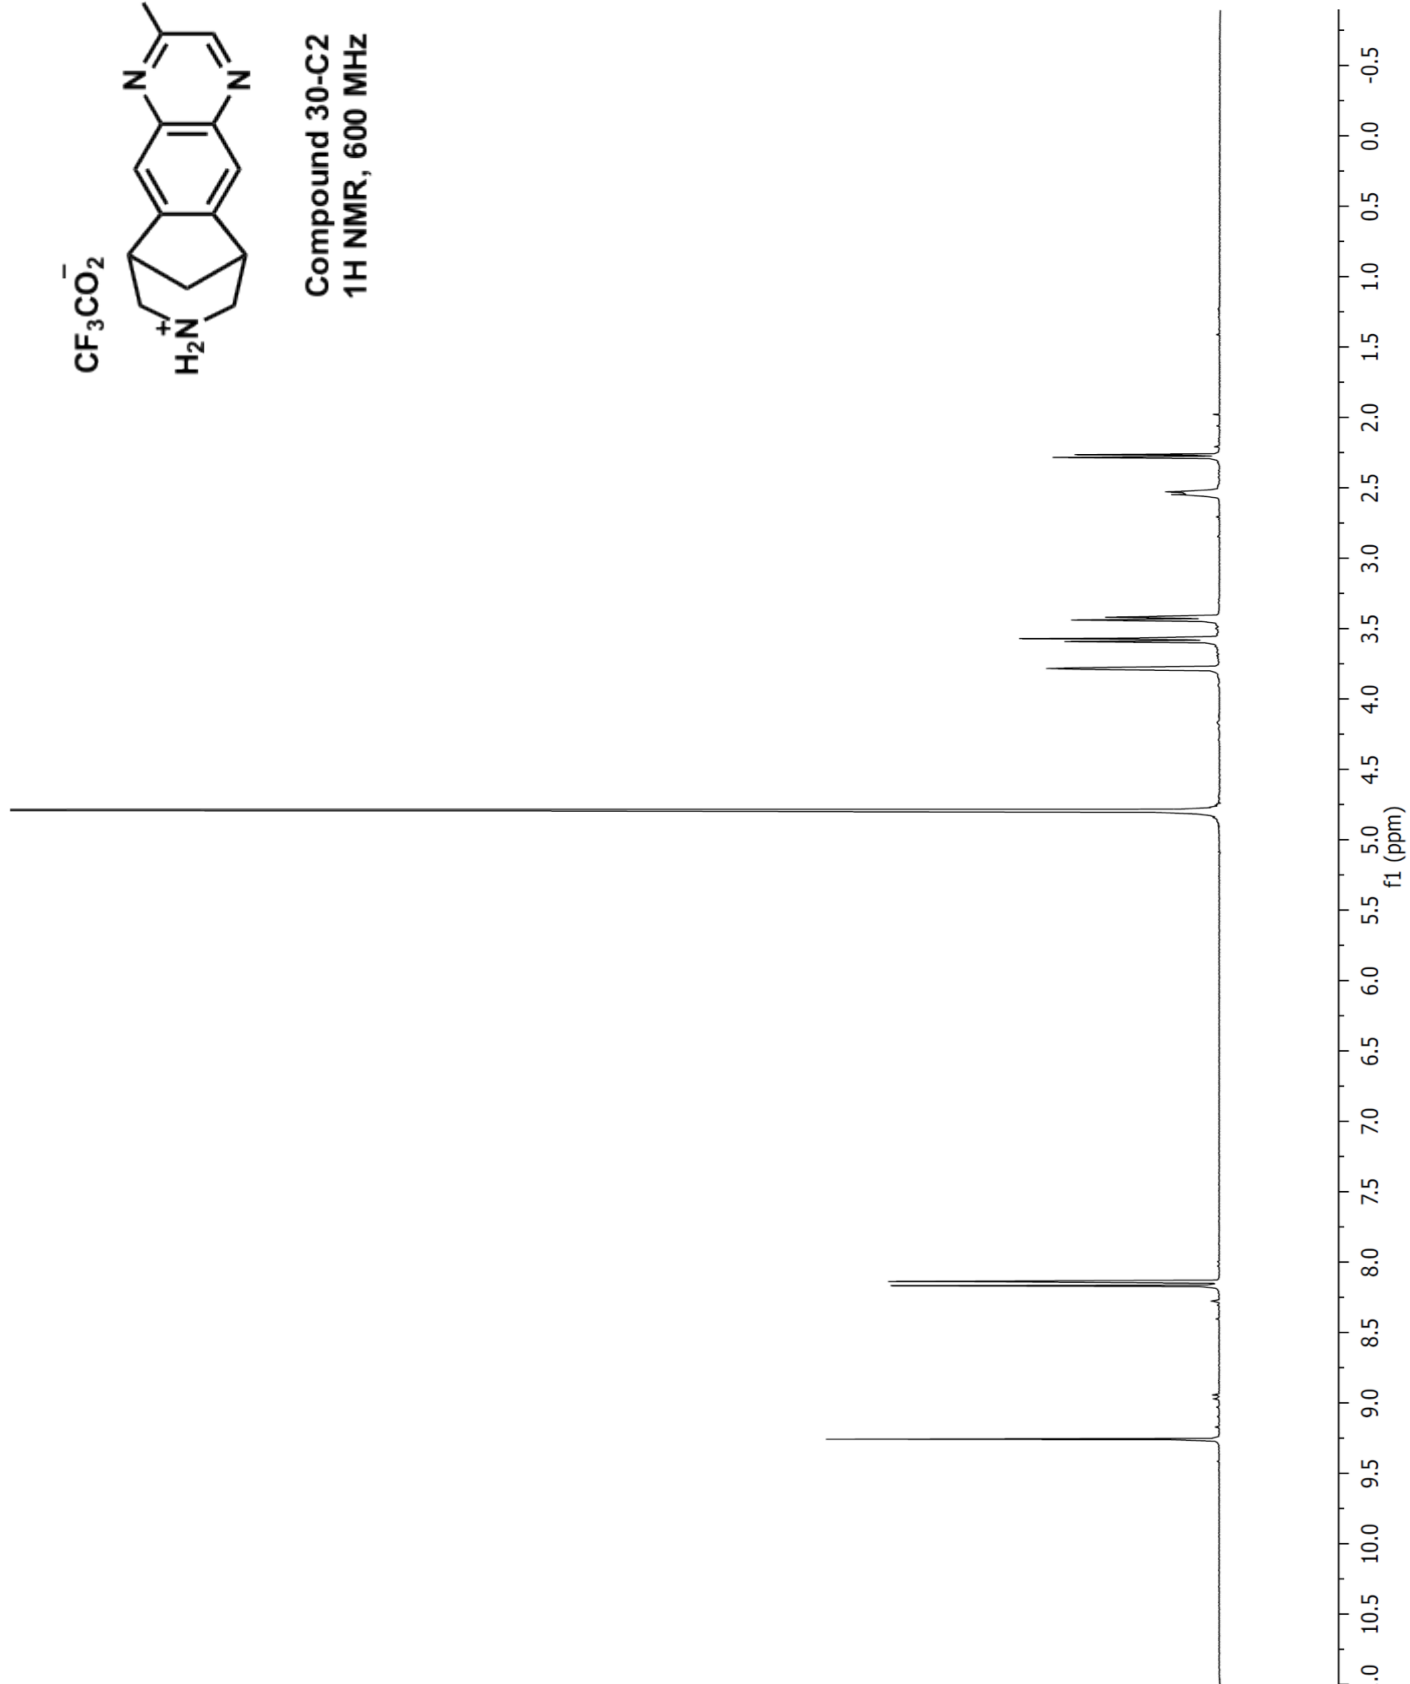

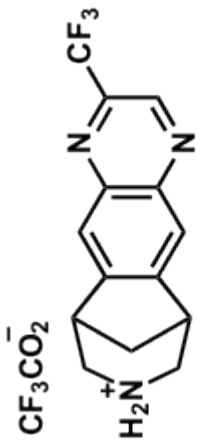

Compound 30-C2  
13C NMR, 150 MHz

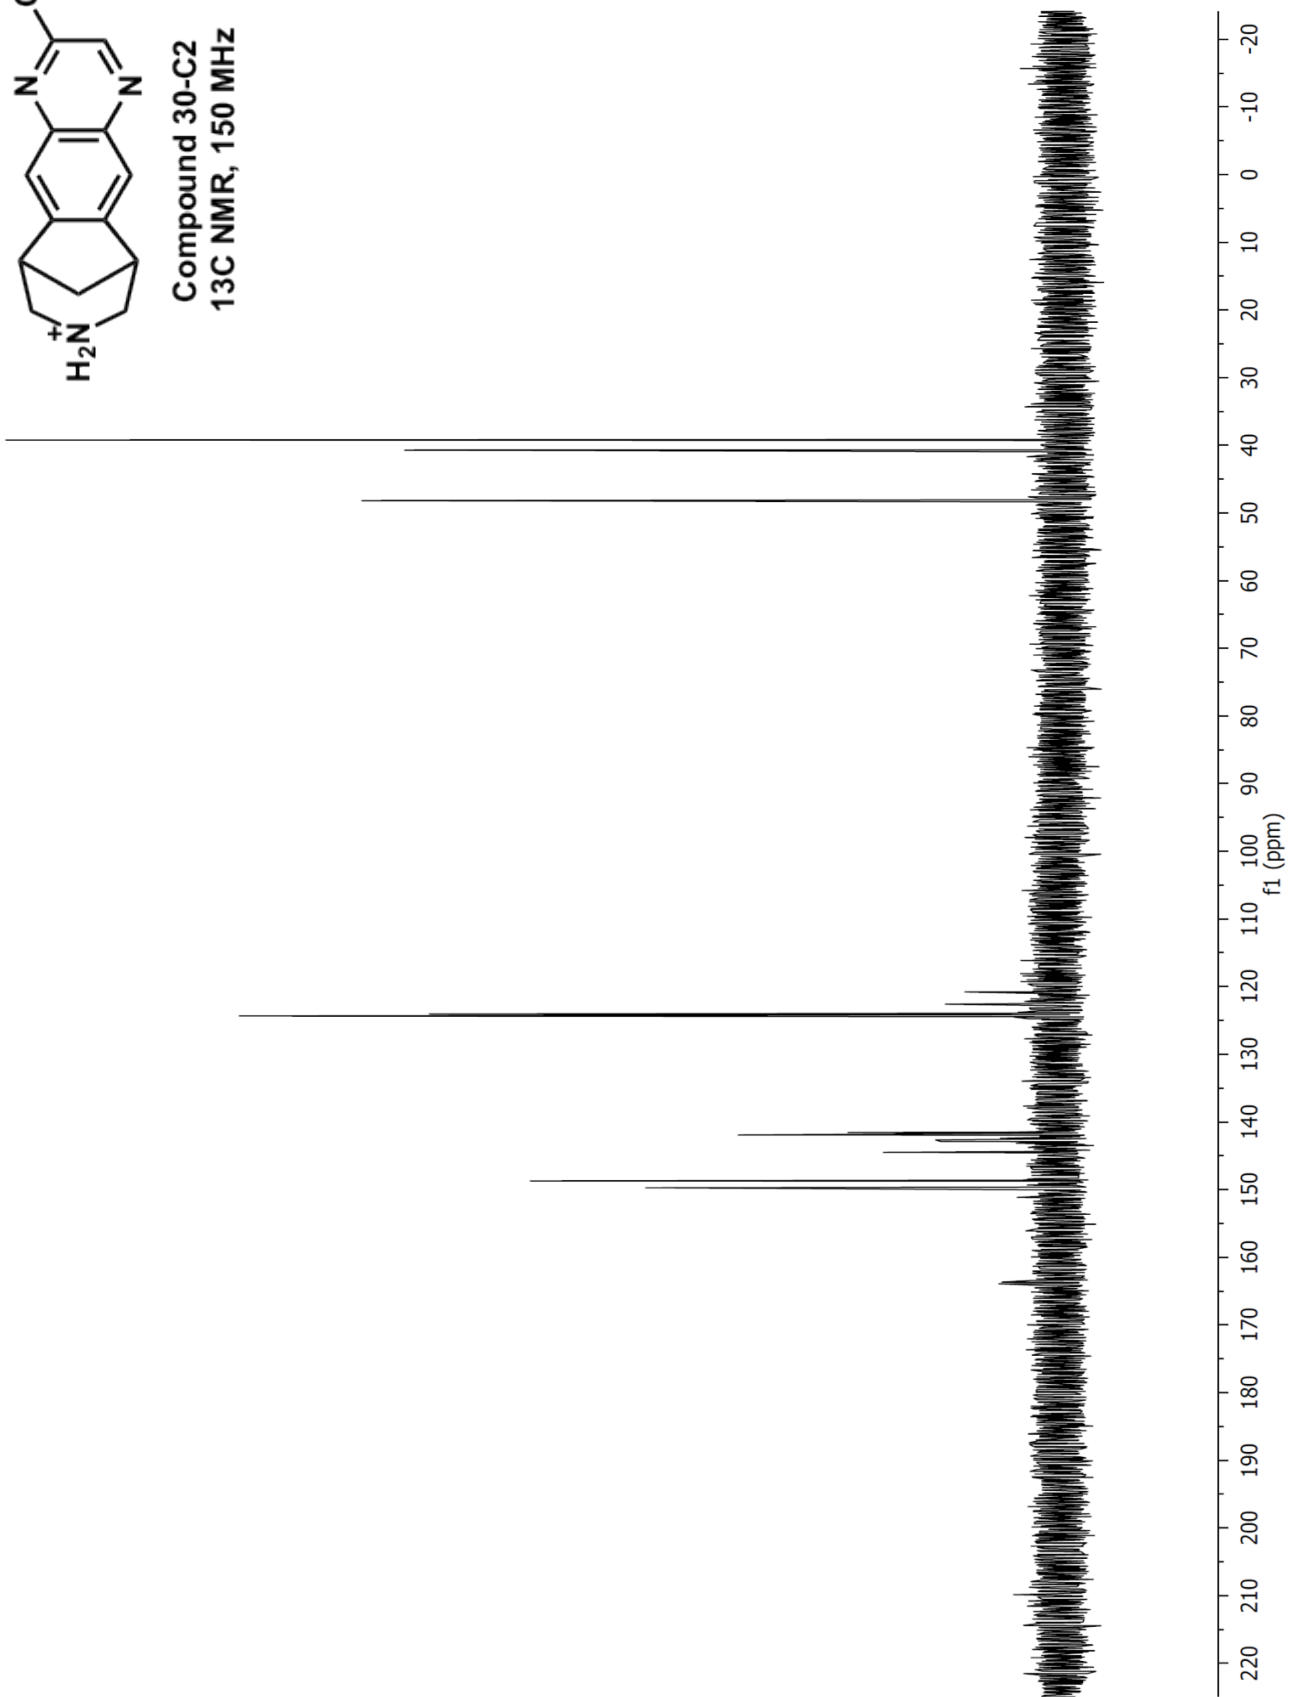

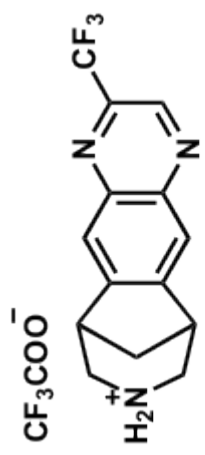

Compound 30-C2  
19F NMR, 376 MHz

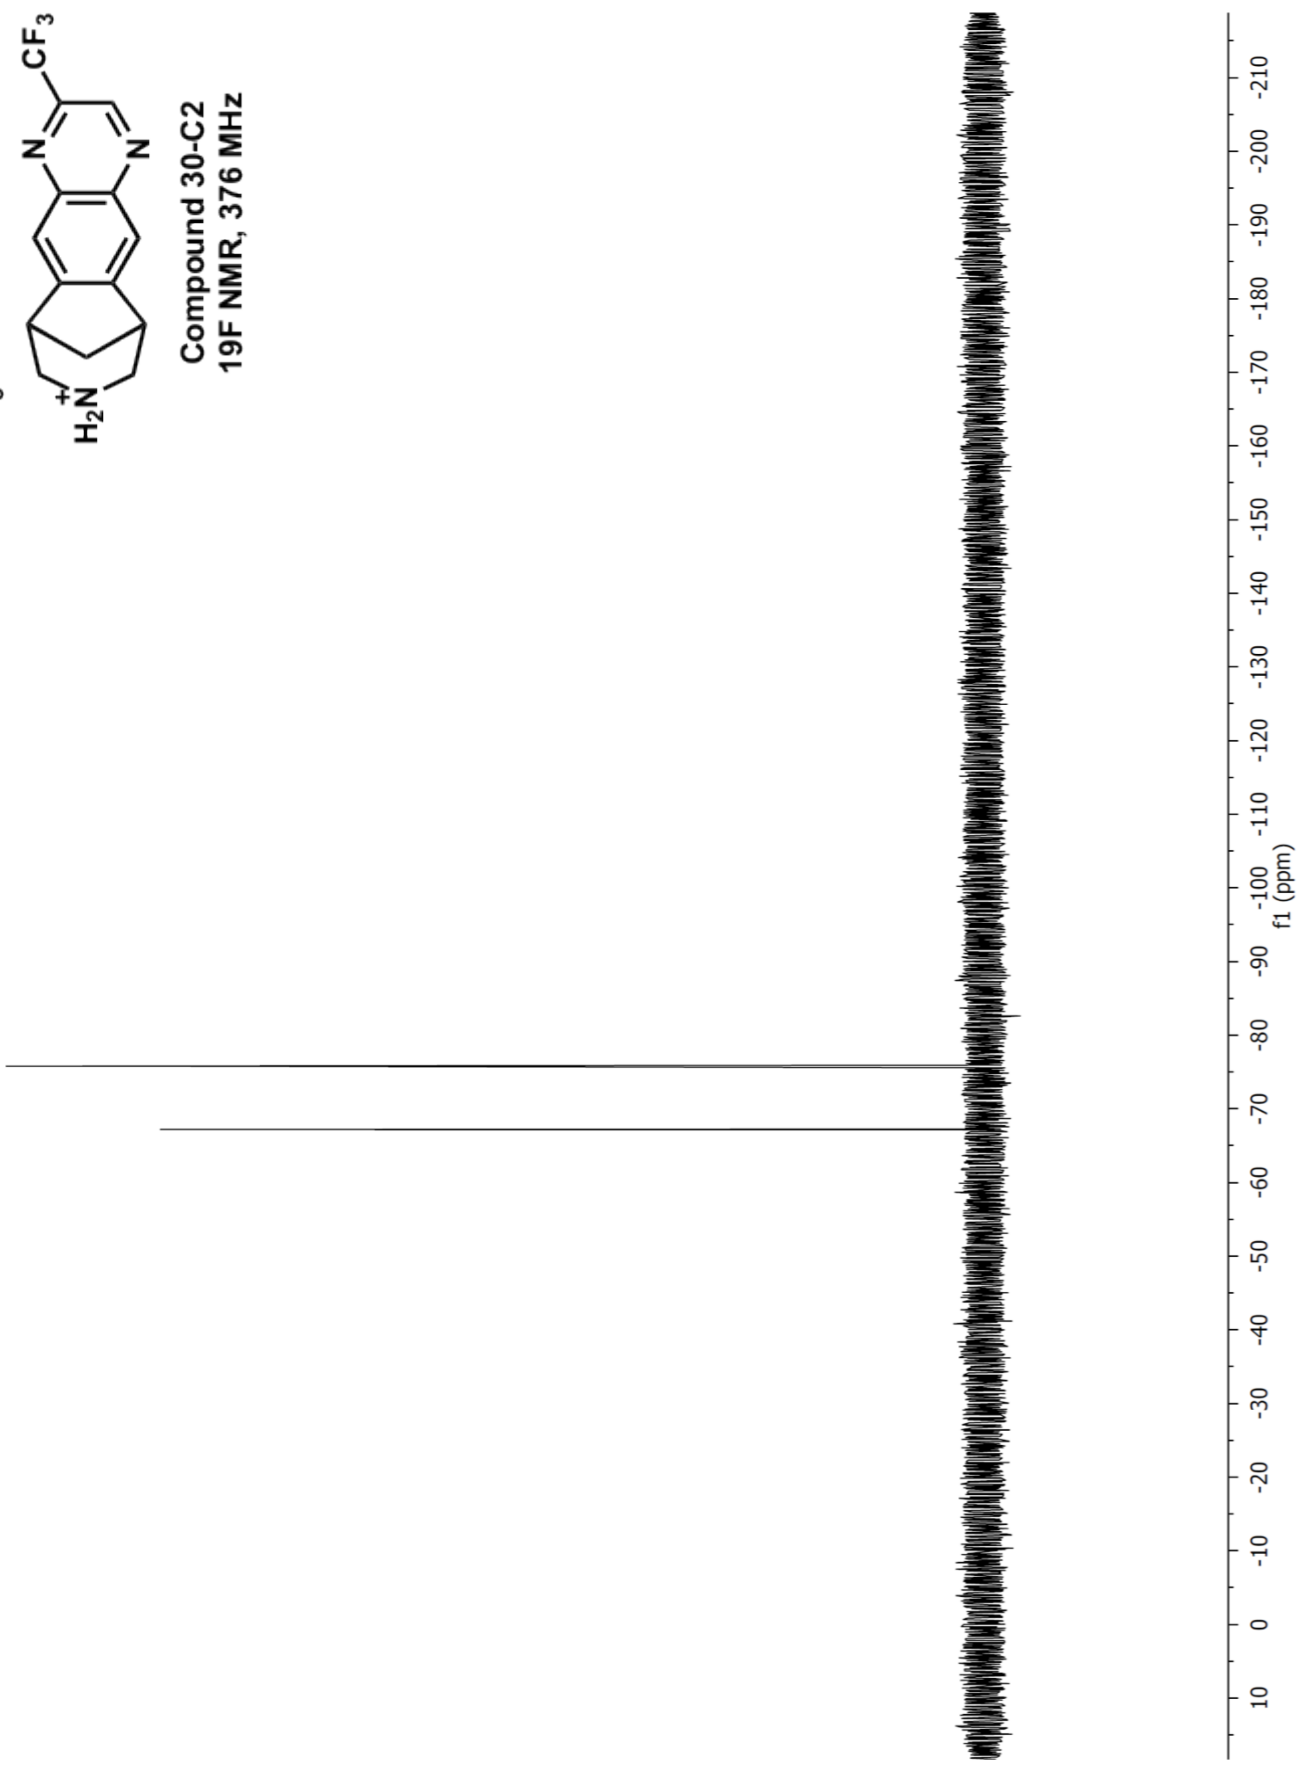

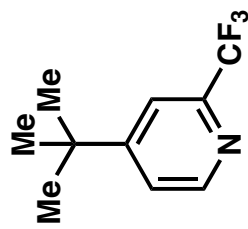

2-trifluoromethyl-4-tert-butylpyridine  
1H NMR, 600 MHz

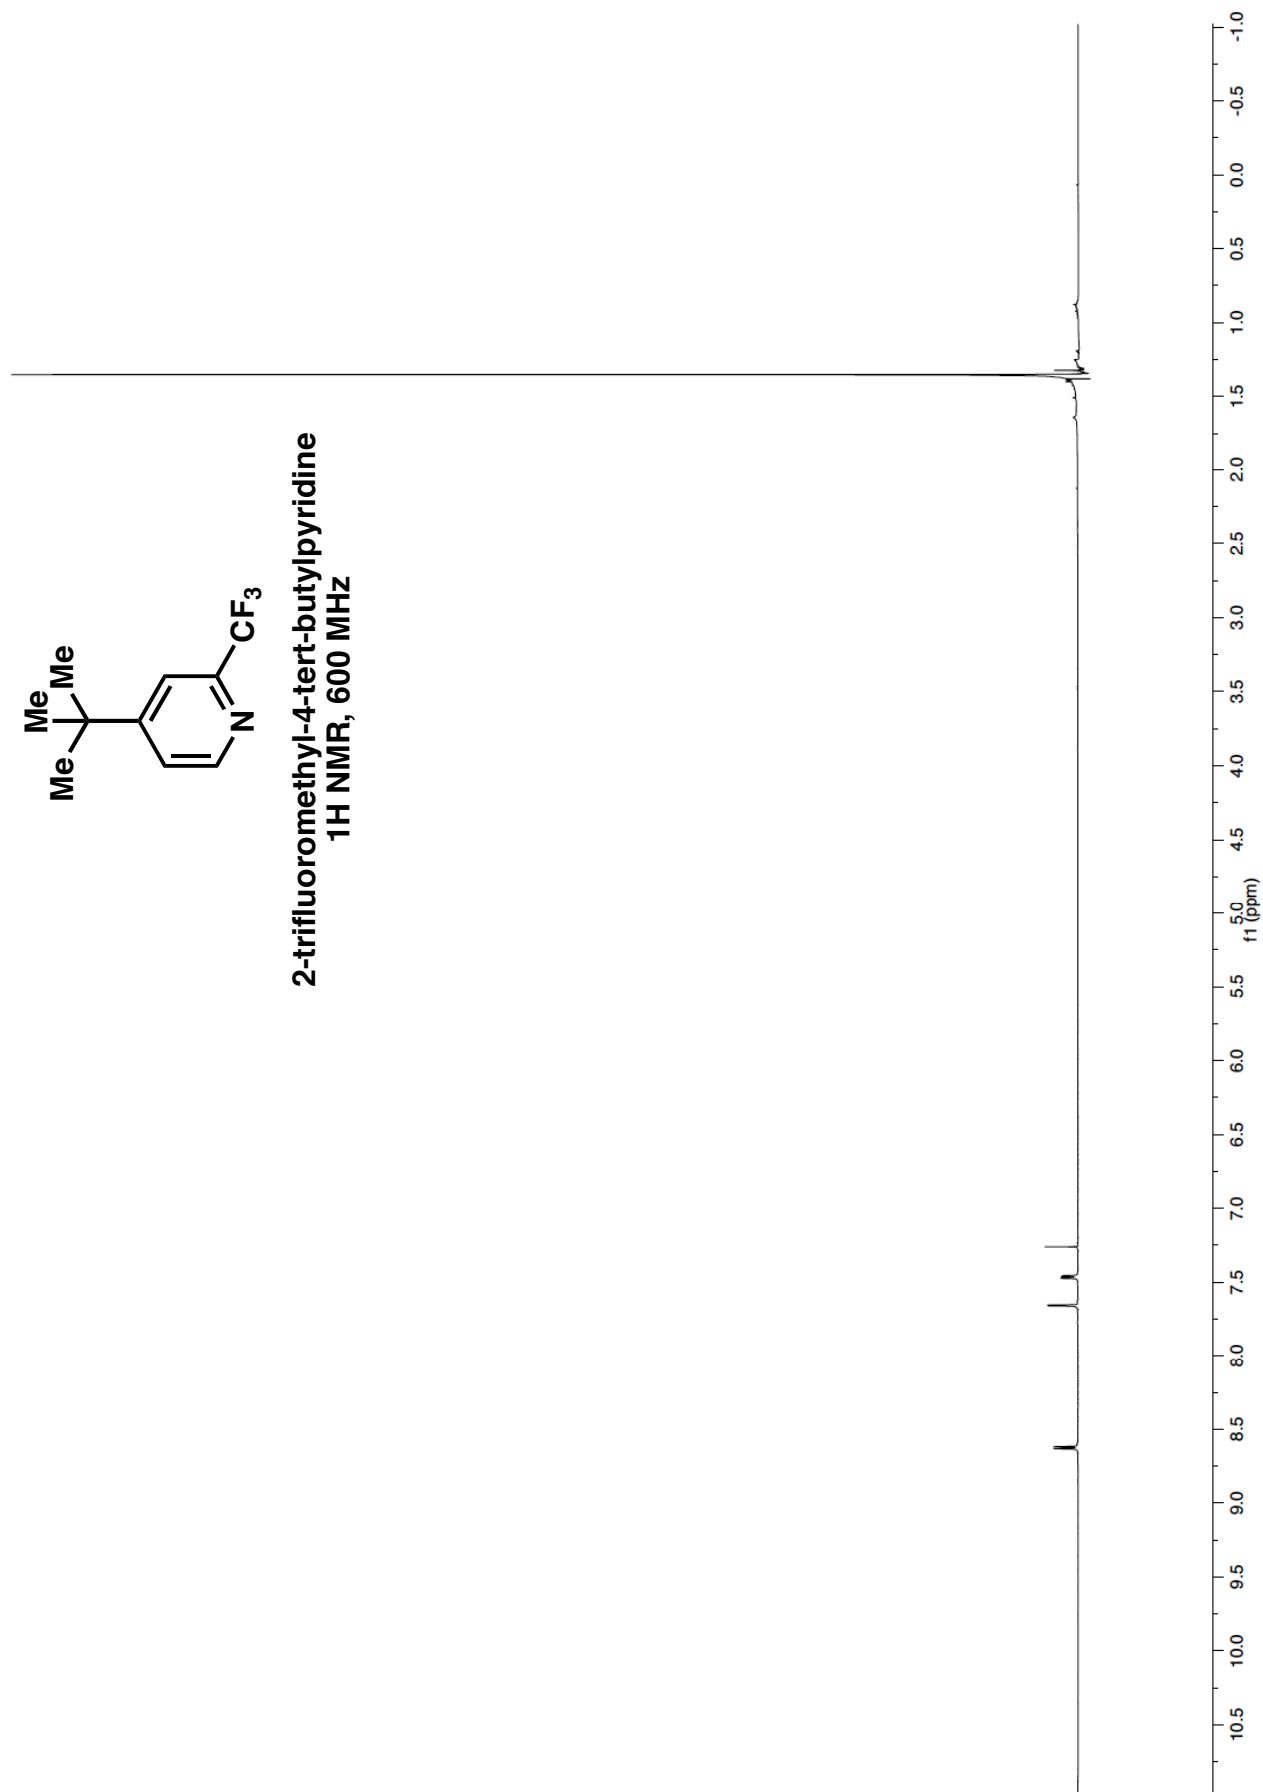

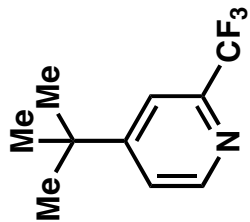

2-tert-butyl-4-(trifluoromethyl)pyridine  
13C NMR, 150 MHz

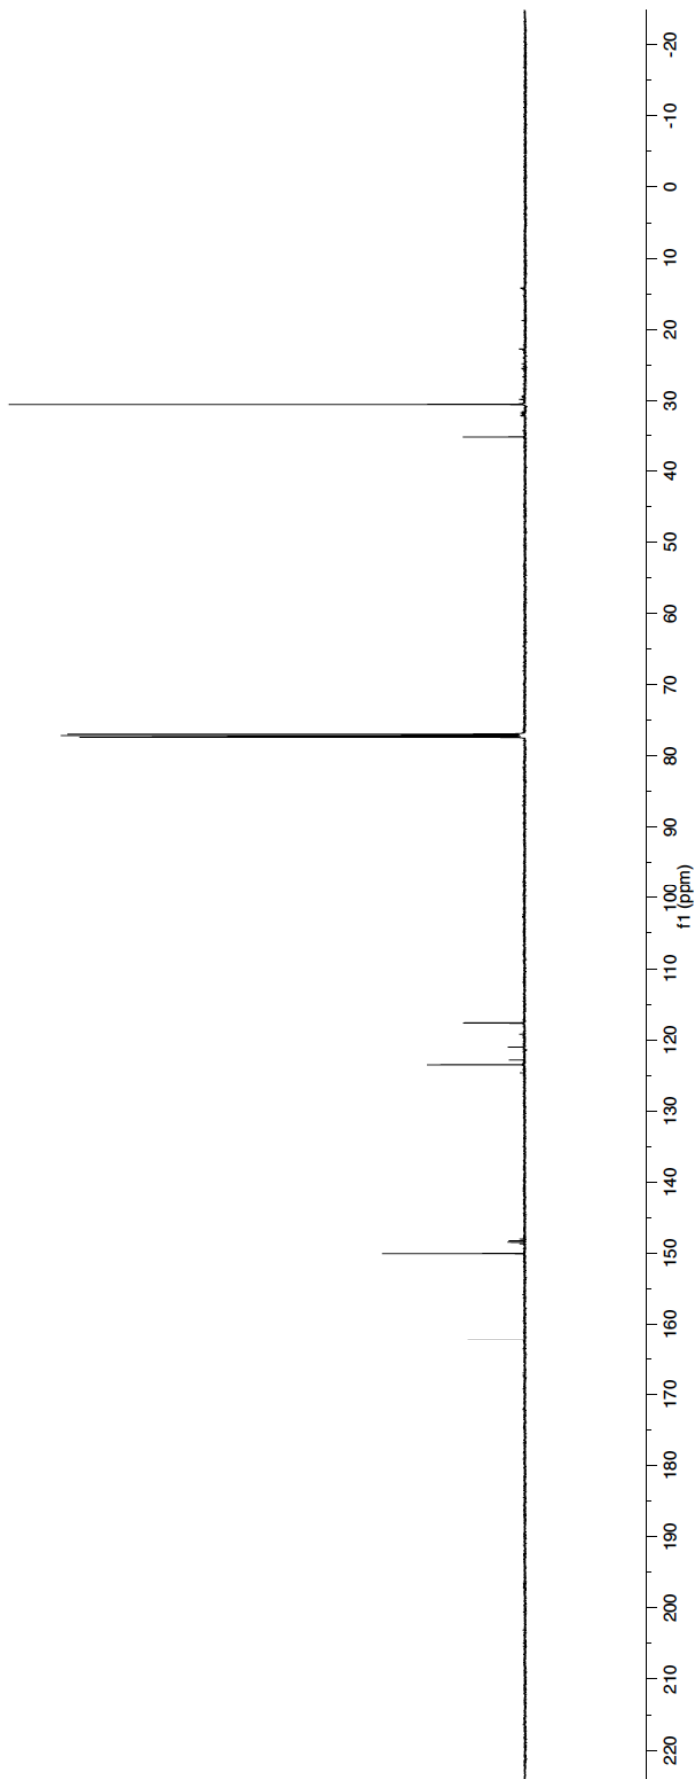

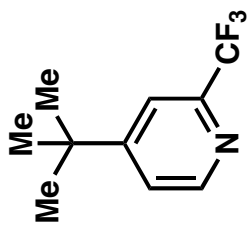

2-(tert-butyl)-4-(trifluoromethyl)pyridine  
19F NMR, 376 MHz

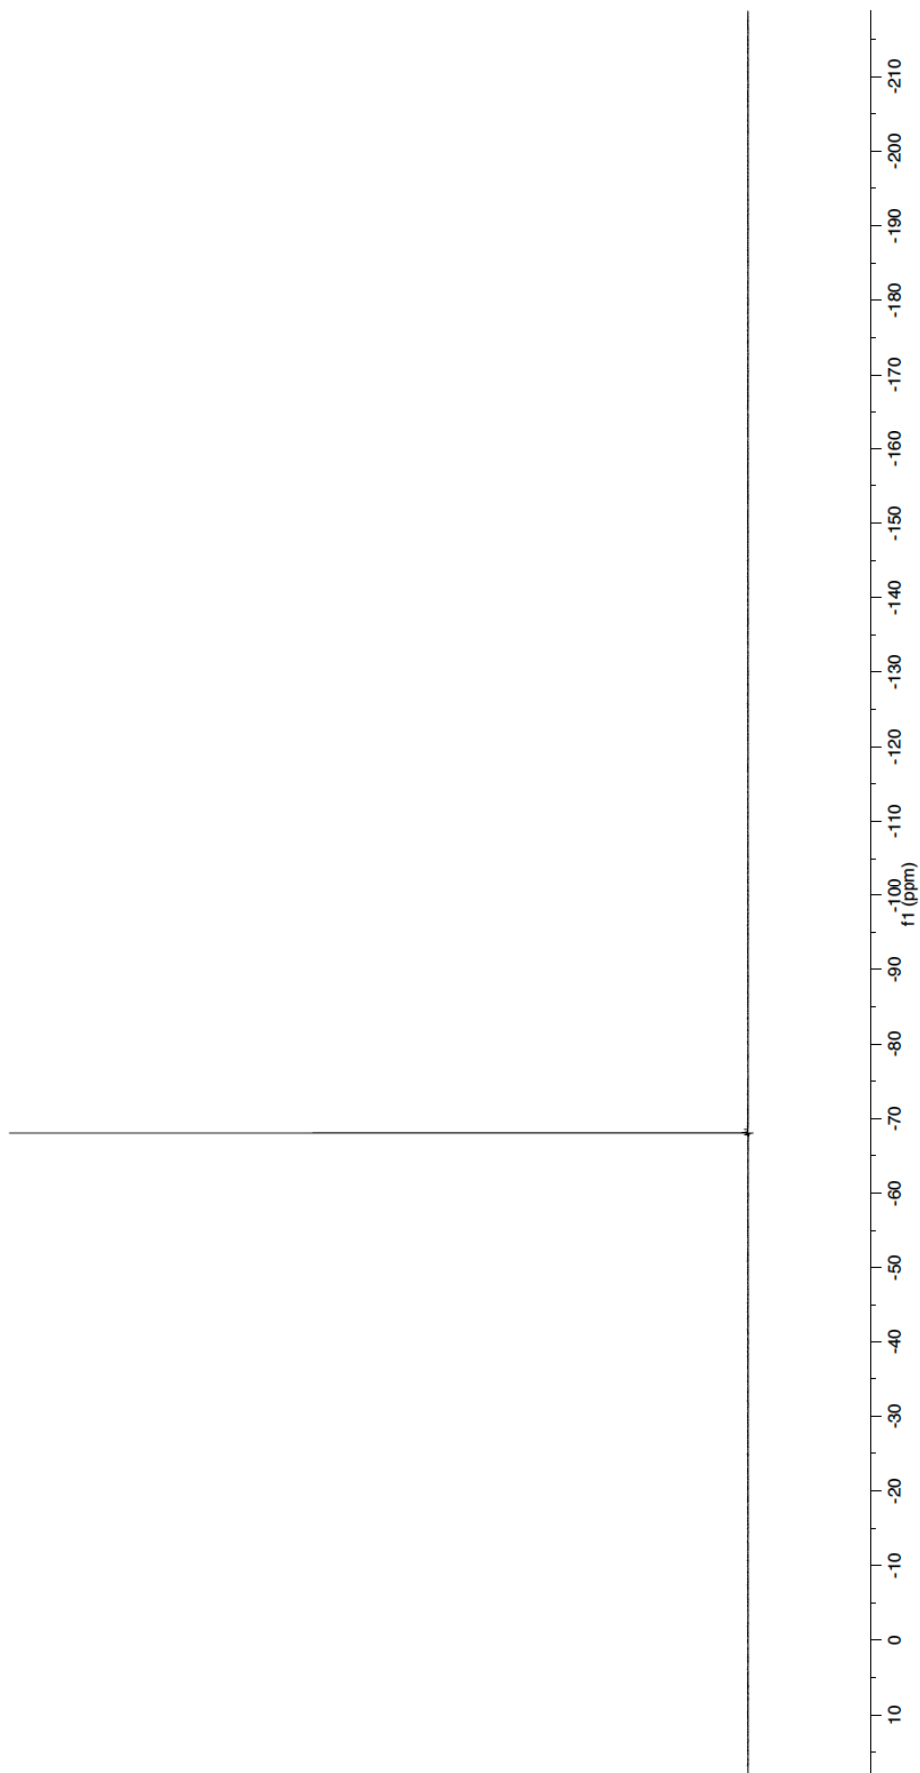

Supplement: 1109059108_Appendix2.pdf [file 1109059108_Appendix2.pdf]
