# Supplementary material
Source: PubMed Central journal article supplement (PMC3167544)
Supplement: 1109059108_Appendix1.pdf [file 1109059108_Appendix1.pdf]

# Innate C–H Trifluoromethylation of Heterocycles

Yining Ji,<sup>+</sup> Tobias Brueckl,<sup>+</sup> Ryan D. Baxter, Yuta Fujiwara, Ian B. Seiple, Shun Su, Donna G.

Blackmond and Phil S. Baran

*Department of Chemistry, The Scripps Research Institute, 10550 N. Torrey Pines Rd, La Jolla,*

*CA 92037*

## SUPPORTING INFORMATION – PROCEDURES

### Table of Contents

|                                                                  |      |              |
|------------------------------------------------------------------|------|--------------|
| General Experimental .....                                       | page | SI-2         |
| Trifluoromethylation of Heterocycles: Standard Procedure .....   | page | SI-3         |
| Trifluoromethylation of Heterocycles: Gram Scale Procedure ..... | page | SI-3         |
| Experimental Procedures and Spectroscopic Data .....             | page | SI-4 – SI-23 |
| Compound 1 .....                                                 | page | SI-4         |
| Compound 3/5A .....                                              | page | SI-5         |
| Compound 4 .....                                                 | page | SI-5         |
| Compound 5 .....                                                 | page | SI-7         |
| Compound 6 .....                                                 | page | SI-8         |
| Compound 7 .....                                                 | page | SI-9         |
| Compound 8 .....                                                 | page | SI-10        |
| Compound 9 .....                                                 | page | SI-10        |
| Compound 10 .....                                                | page | SI-11        |
| Compound 11 .....                                                | page | SI-11        |
| Compound 12 .....                                                | page | SI-12        |
| Compound 13 .....                                                | page | SI-13        |
| Compound 14 .....                                                | page | SI-14        |
| Compound 15 .....                                                | page | SI-14        |
| Compound 16 .....                                                | page | SI-15        |
| Compound 17 .....                                                | page | SI-15        |
| Compound 18 .....                                                | page | SI-16        |
| Compound 19 .....                                                | page | SI-17        |
| Compound 20 .....                                                | page | SI-17        |
| Compound 21 .....                                                | page | SI-18        |
| Compound 22 .....                                                | page | SI-18        |
| Compound 23 .....                                                | page | SI-19        |
| Compound 24 .....                                                | page | SI-19        |
| Compound 25 .....                                                | page | SI-19        |
| Compound 26 .....                                                | page | SI-20        |
| Compound 27 .....                                                | page | SI-21        |
| Compound 28 .....                                                | page | SI-22        |
| Compound 29 .....                                                | page | SI-23        |
| Compound 30 .....                                                | page | SI-23        |

|                                                               |      |       |
|---------------------------------------------------------------|------|-------|
| <i>In Situ</i> Reaction Calorimetric Monitoring .....         | page | SI-24 |
| GC Analysis of Reaction Progress and Conversion.....          | page | SI-25 |
| NMR Analysis of Arene Phase Partitioning .....                | page | SI-27 |
| EPR Evidence for Free Radical Generation .....                | page | SI-28 |
| Observation of CF <sub>3</sub> H via <sup>19</sup> F-NMR..... | page | SI-31 |
| Trace Elemental Analysis of Reagents.....                     | page | SI-32 |
| GC Traces from Figure 7.....                                  | page | SI-33 |

**General Experimental.** All reactions were carried out under an air atmosphere. Reagents were purchased at the highest commercial quality and used without further purification, unless otherwise stated. Yields refer to chromatographically and spectroscopically (<sup>1</sup>H-NMR) homogeneous material, unless otherwise stated. Reactions were monitored by thin layer chromatography (TLC) carried out on 0.25 mm E. Merck silica plates (60F-254), using UV light as the visualizing agent and KMnO<sub>4</sub> as a developing agent. Flash silica gel chromatography was performed using E. Merck silica gel (60, particle size 0.043–0.063 mm). Preparative HPLC was performed using a Phenomenex Gemini C18 110Å AXIA 5 μm column with dimension 30 or 50 x 100 mm, unless otherwise noted. NMR spectra were recorded on Bruker DRX-600, DRX-500, AMX-400, and Varian INOVA-399 instruments and were calibrated using residual undeuterated solvent as an internal reference (CHCl<sub>3</sub> @ 7.26 ppm <sup>1</sup>H-NMR, 77.16 ppm <sup>13</sup>C-NMR; CD<sub>3</sub>OD @ 3.31 ppm <sup>1</sup>H-NMR, 49.0 ppm <sup>13</sup>C-NMR; CD<sub>3</sub>CN 1.94 ppm <sup>1</sup>H-NMR, 1.32 ppm <sup>13</sup>C-NMR). The following abbreviations were used to explain multiplicities: s = singlet, d = doublet, t = triplet, q = quartet, m = multiplet, br = broad. Gas chromatography was performed on an Agilent Technologies 7890A instrument using a 30 meter DB-5 column with an internal diameter of 0.250 millimeters; reaction species were calibrated against tetradecane as an internal standard. *In situ* reaction calorimetry was performed using an Omnical Insight-CPR-220 calorimeter. High resolution mass spectra (HRMS) were recorded on an Agilent LC/MSD TOF mass spectrometer by electrospray ionization time of flight reflectron experiments. IR experiments were recorded

on a Perkin Elmer Spectrum BX FTIR spectrometer. Melting points were recorded on a Fisher-Johns 12-144 melting point apparatus and are uncorrected.

**Trifluoromethylation of Heterocycles: Standard Procedure.** To a solution of heterocycle (0.25 mmol, 1.0 equiv) and sodium trifluoromethylsulfinate (117 mg, 0.75 mmol, 3.0 equiv) in dichloromethane (1.0 mL) and water (0.4 mL) at 0 °C was *slowly* added *tert*-butylhydroperoxide (70% solution in water, 0.17 mL, 1.25 mmol, 5.0 equiv) with vigorous stirring. The reaction was allowed to warm to room temperature and monitored by thin layer chromatography until completion. For substrates which do not go to completion in 24 h, a second addition of sodium trifluoromethylsulfinate (3.0 equiv) and *tert*-butylhydroperoxide (5.0 equiv) may be added to drive the reaction towards completion. Upon consumption of starting material, the reaction was partitioned between dichloromethane (2.0 mL) and saturated sodium bicarbonate (2.0 mL). The organic layer was separated, and the aqueous layer was extracted with dichloromethane (3 X 2.0 mL). The organic layers were dried with sodium sulfate, concentrated, and purified by column chromatography on silica gel.

**NOTES:** If a substrate fails to react or gives unfavorable selectivity, DMSO should be substituted for DCM as a cosolvent, as it causes substrate-dependent (and sometimes notable) changes in reactivity. For more polar substrates, EtOAc may be used in place of DCM for extractive workup. For water-soluble starting materials, a purely aqueous reaction may be run, usually with little to no impact on yield (simply run in 1.0 mL of water). In lieu of a workup, these reactions may be concentrated and purified directly. If the addition of *tert*-butylhydroperoxide is performed too rapidly, the resulting exotherm can result in reduced yield and selectivity. This is especially important on larger scales (see gram scale procedure below), where a syringe pump may be used to meter in *tert*-butylhydroperoxide.

**Trifluoromethylation of Heterocycles: Gram Scale Procedure.** To a solution of heterocycle (1.0 g) and sodium trifluoromethylsulfinate (3.0 equiv) in a mixture of dichloromethane/water (2.5:1, 0.18 M) at 0 °C was added *tert*-butylhydroperoxide (70% solution in water, 5.0 equiv) using a syringe pump (0.1 mL/min). The reaction was allowed to warm to room temperature and monitored by thin layer chromatography until completion, and solvent was removed under reduced pressure. The resulting white solid was washed with EtOAc, and the filtrate was concentrated and purified by column chromatography on silica gel.

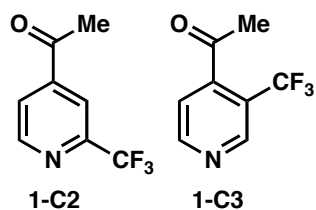

**2-(Trifluoromethyl)-4-acetylpyridine (1-C2) and 3-(trifluoromethyl)-4-acetylpyridine (1-C3).** The Standard Procedure was followed with a reaction time of 24 h (no second addition of reagents) to provide the products in 67 % yield (2.44 to 1).

Data for **1-C2**: colorless oil;  $R_f = 0.34$  (30% EtOAc/hexanes);  $^1\text{H NMR}$  (400 MHz,  $\text{CDCl}_3$ )  $\delta$  8.94 (d,  $J = 4.9$  Hz, 1 H), 8.12 (s, 1 H), 7.94 (d,  $J = 4.7$  Hz, 1 H), 2.69 (s, 3 H) ppm;  $^{13}\text{C NMR}$  (150 MHz,  $\text{CDCl}_3$ )  $\delta$  195.7, 151.5, 149.8 (q,  $J = 35$  Hz), 144.4, 124.6, 121.3 (q,  $J = 274$  Hz), 118.3 (q,  $J = 3$  Hz), 26.8 ppm;  $^{19}\text{F NMR}$  (376 MHz,  $\text{CDCl}_3$ )  $\delta$  -68.3 ppm; IR (neat)  $\nu = 2920, 1701, 1362, 1328, 1236, 1180, 1135, 1112, 1085, 853, 735, 683$   $\text{cm}^{-1}$ ; HRMS (ESI-TOF) calc'd for  $\text{C}_8\text{H}_7\text{F}_3\text{NO}$  [ $\text{M} + \text{H}^+$ ]: 190.0474, found 190.0470. Data for **1-C3**: colorless oil;  $R_f = 0.20$  (30% EtOAc/hexanes);  $^1\text{H NMR}$  (400 MHz,  $\text{CDCl}_3$ )  $\delta$  8.97 (s, 1 H), 8.90 (d,  $J = 5.0$  Hz, 1 H), 7.33 (d,  $J = 4.9$  Hz, 1 H), 2.59 (s, 3 H) ppm;  $^{13}\text{C NMR}$  (150 MHz,  $\text{CDCl}_3$ )  $\delta$  203.0, 157.0, 151.2 (q,  $J = 5.2$  Hz), 150.6, 126.3 (q,  $J = 274$  Hz), 125.1 (q,  $J = 33$  Hz), 123.5, 33.7 ppm;  $^{19}\text{F NMR}$  (376 MHz,  $\text{CDCl}_3$ )  $\delta$  -58.5 ppm; IR (neat)  $\nu = 2924, 1716, 1558, 1330, 1288, 1253, 1140, 1105, 1033, 683$   $\text{cm}^{-1}$ ; HRMS (ESI-TOF) calc'd for  $\text{C}_8\text{H}_7\text{F}_3\text{NO}$  [ $\text{M} + \text{H}^+$ ]: 190.0474, found 190.0478.

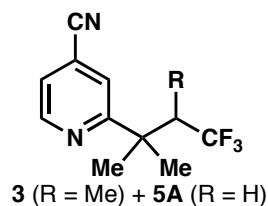

**2-(4,4,4-Trifluoro-2,3-dimethylbutan-2-yl) isonicotinonitrile (3) and 2-(4,4,4-trifluoro-2-methylbutan-2-yl)isonicotinonitrile (5A).**

The Standard Procedure (0.5 mmol) was followed with a reaction time of 18 hours and with an addition of 2-methyl-but-2-ene (5.0 equiv) (no second addition of reagents) to provide the products in 17% yield (2:1 **3**:**5A**). Data for **3**: colorless oil;  $R_f$  = 0.77 (33% EtOAc/hexanes);  $^1\text{H}$  NMR (400 MHz,  $\text{CDCl}_3$ )  $\delta$  8.74 (dd,  $J$  = 4.9 and 1.0 Hz, 1 H), 7.54 (dd,  $J$  = 1.4 and 1.0 Hz, 1 H), 7.36 (dd,  $J$  = 4.9 and 1.4 Hz, 1 H), 3.37 – 3.24 (m, 1 H), 1.48 (q,  $J$  = 0.8 Hz, 3 H), 1.45 (q,  $J$  = 1.4 Hz, 3 H), 1.09 (dd,  $J$  = 7.2 and 0.5 Hz, 3 H);  $^{13}\text{C}$  NMR (150 MHz,  $\text{CDCl}_3$ )  $\delta$  170.1, 150.6, 129.1 (q,  $J$  = 283 Hz), 123.4, 121.9, 117.7, 45.7 (q,  $J$  = 24 Hz), 42.7 (q,  $J$  = 1 Hz), 28.7 (q,  $J$  = 1 Hz), 23.6 (q,  $J$  = 2 Hz), 10.5 (q,  $J$  = 4 Hz);  $^{19}\text{F}$  NMR (376 MHz,  $\text{CDCl}_3$ )  $\delta$  -65.6 ppm. Data for **3** and **5A**: IR (neat)  $\nu$  = 2982, 1593, 1553, 1365, 1174, 1156, 1090, 1056, 842, 506  $\text{cm}^{-1}$ ; HRMS (ESI-TOF) calc'd for  $\text{C}_{12}\text{H}_{14}\text{F}_3\text{N}_2$  [ $\text{M} + \text{H}^+$ ]: 243.1104; found 243.1115, calc'd for  $\text{C}_{11}\text{H}_{12}\text{F}_3\text{N}_2$  [ $\text{M} + \text{H}^+$ ]: 229.0947; found 229.0953.

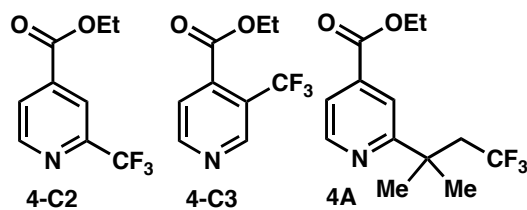

**Ethyl 2-(trifluoromethyl)isonicotinate (4-C2) and ethyl 3-(trifluoromethyl)isonicotinate (4-C3), and ethyl 2-(4,4,4-trifluoro-2-methylbutan-2-yl)isonicotinate (4A).**

The Standard Procedure was followed with a reaction time of 40 hours (second addition of trifluoromethylsulfinate and *tert*-butylhydrogen peroxide after 16 h) to provide **4-C2** and **4-C3** (4.1:1 C2:C3) in 53% yield and the **4A** in 9% yield. Data for **4-C2**: colorless oil;  $R_f$  = 0.58 (20% EtOAc/hexanes);  $^1\text{H}$  NMR (400 MHz,  $\text{CDCl}_3$ )  $\delta$  8.90 (d,  $J$  = 4.9 Hz, 1 H), 8.23 (s, 1 H), 8.06 (d,  $J$  = 4.8 Hz, 1 H), 4.46 (q,  $J$  = 7.1 Hz, 2 H), 1.44 (t,  $J$  = 7.1 Hz, 3 H) ppm;  $^{13}\text{C}$  NMR (150 MHz,  $\text{CDCl}_3$ )  $\delta$  164.00, 151.1, 149.4 (q,

$J = 35$  Hz), 139.6, 125.9, 121.4 (q,  $J = 274$  Hz), 120.0 (q,  $J = 3$  Hz), 62.6, 14.3 ppm;  $^{19}\text{F}$  NMR (400 MHz,  $\text{CDCl}_3$ )  $\delta$  -58.5 ppm; IR (neat)  $\nu = 2983, 1731, 1329, 1253, 1239, 1179, 1139, 1101, 1082, 1017, 764, 696, 677$   $\text{cm}^{-1}$ ; HRMS (ESI-TOF) calc'd for  $\text{C}_9\text{H}_9\text{F}_3\text{NO}_2$  [ $\text{M} + \text{H}^+$ ] 220.0580, found: 220.0585. Data for **4-C3**: colorless oil;  $R_f = 0.45$  (20% EtOAc/hexanes);  $^1\text{H}$  NMR (400 MHz,  $\text{CDCl}_3$ )  $\delta$  9.02 (s, 1 H), 8.91 (d,  $J = 4.9$  Hz, 1 H), 7.64 (d,  $J = 4.9$  Hz, 1 H), 4.44 (q,  $J = 7.1$  Hz, 2 H), 1.40 (t,  $J = 7.1$  Hz, 3 H) ppm;  $^{13}\text{C}$  NMR (150 MHz,  $\text{CDCl}_3$ )  $\delta$  165.1, 153.8, 148.0 (q,  $J = 6$  Hz), 139.0, 123.5 (d,  $J = 33$  Hz), 123.2, 122.9 (q,  $J = 274$  Hz), 63.0, 14.00 ppm;  $^{19}\text{F}$  NMR (400 MHz,  $\text{CDCl}_3$ )  $\delta$  -61.9 ppm; IR (neat)  $\nu = 2982, 1739, 1328, 1303, 1270, 1206, 1141, 1085, 1031, 689$   $\text{cm}^{-1}$ ; HRMS (ESI-TOF) calc'd for  $\text{C}_9\text{H}_9\text{F}_3\text{NO}_2$  [ $\text{M} + \text{H}^+$ ] 220.0580, found: 220.0587. Data for **4A**: colorless oil;  $R_f = 0.65$  (20% EtOAc/hexanes);  $^1\text{H}$  NMR (400 MHz,  $\text{CDCl}_3$ )  $\delta$  8.71 (d,  $J = 4.9$  Hz, 1 H), 7.88 (s, 1 H), 7.69 (d,  $J = 4.9$  Hz, 1 H), 4.42 (q,  $J = 7.1$  Hz, 2 H), 2.74 (q,  $J = 11.5$  Hz, 2 H), 1.50 (s, 6H), 1.42 (t,  $J = 7.1$  Hz, 3 H) ppm;  $^{13}\text{C}$  NMR (150 MHz,  $\text{CDCl}_3$ )  $\delta$  167.2, 165.6, 149.7, 138.3, 126.8 (q,  $J = 279$  Hz), 120.6, 118.5, 61.9, 44.8 (q,  $J = 26$  Hz), 38.7, 28.2, 14.4 ppm;  $^{19}\text{F}$  NMR (400 MHz,  $\text{CDCl}_3$ )  $\delta$  -60.3 ppm; IR (neat)  $\nu = 2981, 1730, 1405, 1362, 1302, 1279, 1262, 1230, 1177, 1150, 1106, 1058, 1033, 1015, 764$   $\text{cm}^{-1}$ ; HRMS (ESI-TOF) calc'd for  $\text{C}_{13}\text{H}_{16}\text{F}_3\text{NO}_2$  [ $\text{M} + \text{H}^+$ ] 276.1206, found 276.1199.

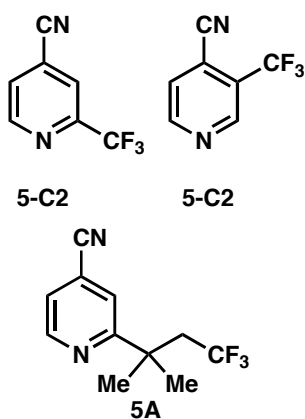

**2-Trifluoromethyl-4-cyanopyridine (5-C2), 2-trifluoromethyl-4-cyanopyridine (5-C3) and 2-(4,4,4-trifluoro-2,3-dimethylbutan-2-yl)isonicotinonitrile (5A).** The Standard Procedure was followed with a reaction time of 40 h (second addition of trifluoromethylsulfinate and *tert*-butylhydroperoxide after 16 h) to provide **5-C2** and **5-C3** in 48% yield (2.4:1 C2:C3) and **5A** in 10% yield. Data for **5-C2**: colorless oil;  $R_f = 0.53$  (20% EtOAc/hexanes);

$^1\text{H}$  NMR (400 MHz,  $\text{CDCl}_3$ )  $\delta$  8.95 (d,  $J = 4.9$  Hz, 1 H), 7.92 (s, 1 H), 7.76 (d,  $J = 4.8$  Hz, 1 H) ppm;  $^{13}\text{C}$  NMR (150 MHz,  $\text{CDCl}_3$ )  $\delta$  151.4, 149.9 (q,  $J = 36$  Hz), 128.3, 122.4 (q,  $J = 3$  Hz), 122.4, 120.7 (q,  $J = 275$  Hz), 115.4 ppm;  $^{19}\text{F}$  NMR (400 MHz,  $\text{CDCl}_3$ )  $\delta$  -58.5 ppm; IR (neat)  $\nu = 2922, 2852, 2244, 1603, 1560, 1420, 1325, 1184, 1141, 1111, 1086, 862, 743, 687$   $\text{cm}^{-1}$ ; product did not ionize sufficiently on ESI-TOF HRMS to collect a high resolution mass spectrum. Data for **5-C3**: colorless oil;  $R_f = 0.31$  (20% EtOAc/hexanes);  $^1\text{H}$  NMR (400 MHz,  $\text{CDCl}_3$ )  $\delta$  9.11 (s, 1 H), 9.03 (d,  $J = 5.0$  Hz, 1 H), 7.74 (d,  $J = 4.9$  Hz, 1 H) ppm;  $^{13}\text{C}$  NMR (150 MHz,  $\text{CDCl}_3$ )  $\delta$  154.2, 147.9 (q,  $J = 5$  Hz), 127.0, 126.8 (q,  $J = 33$  Hz), 121.9 (q,  $J = 274$  Hz), 118.6 (q,  $J = 2$  Hz), 113.4 ppm;  $^{19}\text{F}$  NMR (400 MHz,  $\text{CDCl}_3$ )  $\delta$  -61.9 ppm; IR (neat)  $\nu = 2923, 2244, 1603, 1560, 1420, 1325, 1184, 1143, 1111, 1086, 862, 742, 687$   $\text{cm}^{-1}$ ; HRMS-ESI  $m/z$  calcd. for  $\text{C}_8\text{H}_6\text{F}_3\text{NO}$ : 172.0248, product did not ionize sufficiently on ESI-TOF HRMS to collect a high resolution mass spectrum. Data for **5A**: colorless oil;  $R_f = 0.61$  (20% EtOAc/hexanes);  $^1\text{H}$  NMR (400 MHz,  $\text{CDCl}_3$ )  $\delta$  8.75 (d,  $J = 4.9$  Hz, 1 H), 7.54 (s, 1 H), 7.37 (d,  $J = 4.9$  Hz, 1 H), 2.73 (q,  $J = 11.4$  Hz, 2 H), 1.48 (s, 6H) ppm;  $^{13}\text{C}$  NMR (150 MHz,  $\text{CDCl}_3$ )  $\delta$  168.5, 150.7, 127.3 (q,  $J = 279$  Hz), 123.6, 121.8, 121.7, 117.7, 45.3 (q,  $J = 27$  Hz), 39.6, 28.7 ppm;  $^{19}\text{F}$  NMR (400 MHz,  $\text{CDCl}_3$ )  $\delta$  -68.7 ppm; IR (neat)  $\nu = 2973, 2239, 1593, 1553, 1363, 1261, 1195, 1177, 1136, 1108, 1071, 1060, 1033, 1016, 841$   $\text{cm}^{-1}$ ; HRMS (ESI-TOF) calc'd for  $\text{C}_{11}\text{H}_{12}\text{F}_3\text{N}_2$  [ $\text{M} + \text{H}^+$ ]: 229.0947, found 229.0971.

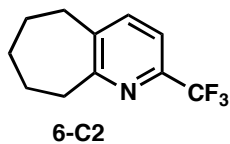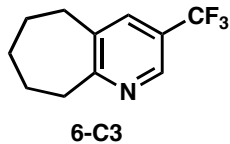

**2-(trifluoromethyl)-6,7,8,9-tetrahydro-5H-cyclohepta[b]pyridine (6-C2) and 3-(trifluoromethyl)-6,7,8,9-tetrahydro-5H-cyclohepta[b]pyridine (6-C3).**

The Standard Procedure was followed with a reaction time of 40 hours (56% of conversion, second addition of trifluoromethylsulfinate and *tert*-butylhydroperoxide after 16 h) to provide the

products in 43% yield (1.1:1, C2:C3). Data for **6-C2**: colorless oil;  $R_f = 0.62$  (20% EtOAc/hexanes);  $^1\text{H NMR}$  (400 MHz,  $\text{CDCl}_3$ )  $\delta$  7.51 (d,  $J = 7.7$  Hz, 1 H), 7.39 (d,  $J = 7.7$  Hz, 1 H), 3.23 – 3.00 (m, 2 H), 2.92 – 2.70 (m, 2 H), 2.13 – 1.81 (m, 2 H), 1.75 – 1.67 (m, 4 H) ppm;  $^{13}\text{C NMR}$  (150 MHz,  $\text{CDCl}_3$ )  $\delta$  165.1, 145.5 (q,  $J = 34$  Hz), 142.5, 138.0, 122.7 (q,  $J = 274$  Hz), 118.8 (q,  $J = 3$  Hz), 40.0, 36.0, 33.2, 28.5, 27.1 ppm;  $^{19}\text{F NMR}$  (400 MHz,  $\text{CDCl}_3$ )  $\delta$  -68.7 ppm; IR (neat)  $\nu = 2922, 2846, 1054, 1033, 1013$   $\text{cm}^{-1}$ ; HRMS (ESI-TOF) calc'd for  $\text{C}_{11}\text{H}_{13}\text{F}_3\text{N}$  [ $\text{M} + \text{H}^+$ ]: 216.0995, found: 216.0995. Data for **6-C3**: colorless oil;  $R_f = 0.38$  (20% EtOAc/hexanes);  $^1\text{H NMR}$  (400 MHz,  $\text{CDCl}_3$ )  $\delta$  8.42 (d,  $J = 5.1$  Hz, 1 H), 7.32 (d,  $J = 5.2$  Hz, 1 H), 3.23 – 3.11 (m, 2 H), 2.95 (m, 2 H), 1.88 (m, 2 H), 1.79 – 1.61 (m, 4 H) ppm;  $^{13}\text{C NMR}$  (150 MHz,  $\text{CDCl}_3$ )  $\delta$  166.9, 147.3, 136.8, 136.4 (q,  $J = 30$  Hz), 124.4 (q,  $J = 275$  Hz), 118.1 (q,  $J = 5$  Hz), 39.8, 32.7, 29.9, 27.7, 26.9 ppm;  $^{19}\text{F NMR}$  (400 MHz,  $\text{CDCl}_3$ )  $\delta$  -58.5 ppm; IR (neat)  $\nu = 2925, 1316, 1159, 1134, 1054, 1033, 1013$   $\text{cm}^{-1}$ ; HRMS (ESI-TOF) calc'd for  $\text{C}_{11}\text{H}_{13}\text{F}_3\text{N}$  [ $\text{M} + \text{H}^+$ ] 216.0995, found: 216.0996.

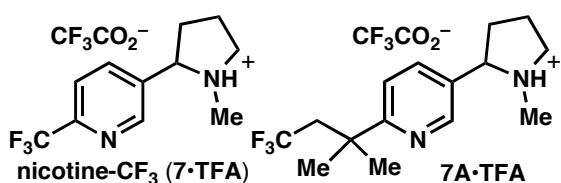

**Nicotine- $\text{CF}_3$ •TFA (7•TFA) and 1-methyl-2-(6-(4,4,4-trifluoro-2-methylbutan-2-yl)pyridin-3-yl)pyrrolidin-1-ium 2,2,2-trifluoroacetate (7A•TFA).**

The Standard Procedure was followed (1.0 equiv of TFA added before initial addition of reagents) with a reaction time of 21 h (no second addition of reagents) to provide the products **7•TFA** and **7A•TFA** in 44% and 7% yield respectively. Purification was accomplished by preparative HPLC (10% to 45% MeCN in water, 0.1% TFA, 25 minute ramp;  $R_T$  for **7•TFA** = 9.0 min,  $R_T$  for **7A•TFA** = 15.3 min). Data for **7•TFA**: colorless oil;  $^1\text{H NMR}$  (400 MHz,  $\text{CD}_3\text{OD}$ )  $\delta$  8.85 (d,  $J = 1.8$  Hz, 1 H), 8.24 (d,  $J = 8.1$  Hz, 1 H), 7.92 (d,  $J = 8.2$  Hz, 1 H), 4.54 (br, 1 H), 3.89 (br, 1 H), 3.33 (br, 1 H), 2.80 (s, 3 H), 2.59 (m, 1 H), 2.38 (br, 1 H), 2.32 – 2.27 (m, 2



H) ppm;  $^{13}\text{C}$  NMR (150 MHz,  $\text{CD}_3\text{OD}$ )  $\delta$  162.0 (q,  $J = 33$  Hz), 151.8, 150.4 (q,  $J = 35$  Hz), 139.6, 133.7, 122.7 (q,  $J = 274$  Hz), 122.4, 117.6 (q,  $J = 289$  Hz), 70.8, 57.5, 39.3, 32.2, 22.8 ppm;  $^{19}\text{F}$  NMR (400 MHz,  $\text{CDCl}_3$ )  $\delta$  -68.8, -77.4 ppm; IR (neat)  $\nu = 3342, 2981, 1662, 1462, 1424, 1337, 1176, 1124, 1087, 835, 799, 721$   $\text{cm}^{-1}$ ; HRMS (ESI-TOF) calc'd for  $\text{C}_{11}\text{H}_{13}\text{F}_3\text{N}_2$  [ $\text{M} + \text{H}^+$ ]: 231.1104, found 231.1109. Data for **7A**•TFA: colorless oil,  $^1\text{H}$  NMR (400 MHz,  $\text{CD}_3\text{OD}$ )  $\delta$  8.66 (d,  $J = 2.1$  Hz, 1 H), 7.95 (dd,  $J = 8.3$  and 2.0 Hz, 1 H), 7.61 (d,  $J = 8.3$  Hz, 1 H), 4.43 (dd,  $J = 10.4$  and 7.7 Hz, 1 H), 3.89 – 3.82 (m, 1 H), 2.37 – 2.30 (m, 1 H), 2.79 (q,  $J = 11.6$  Hz, 2 H), 2.78 (s, 3 H), 2.61 – 2.52 (m, 1 H), 2.42 – 2.33 (m, 1 H), 2.33 – 2.23 (m, 2 H), 1.47 (s, 6 H) ppm;  $^{13}\text{C}$  NMR (150 MHz,  $\text{CD}_3\text{OD}$ )  $\delta$  169.5, 161.6 (q,  $J = 37$  Hz), 150.2, 138.1, 128.3 (q,  $J = 251$  Hz), 127.3, 121.5, 117.5 (q,  $J = 290$  Hz), 71.2, 57.2, 45.3 (q,  $J = 26$  Hz), 39.6, 39.1, 31.8, 28.4, 22.7 ppm;  $^{19}\text{F}$  NMR (400 MHz,  $\text{CDCl}_3$ )  $\delta$  -61.7, -77.5 ppm; IR (neat)  $\nu = 3347, 1672, 1432, 1202, 1138, 1015$   $\text{cm}^{-1}$ ; HRMS (ESI-TOF) calc'd for  $\text{C}_{15}\text{H}_{22}\text{F}_3\text{N}_2$  [ $\text{M} + \text{H}^+$ ]: 287.1730, found: 287.1731.

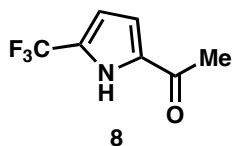

**1-(5-(trifluoromethyl)-1H-pyrrol-2-yl)ethanone (8).** The Standard

Procedure was followed with a reaction time of 24 h (no second addition of reagents) to provide the product in 57% yield: white solid;  $R_f = 0.45$  (20%

EtOAc/hexanes); m.p.: 65-67 °C;  $^1\text{H}$  NMR (400 MHz,  $\text{CDCl}_3$ )  $\delta$  9.80 (brs, 1 H), 6.89 (brs, 1 H), 6.64 (brs, 1 H), 2.51 (s, 3 H) ppm;  $^{13}\text{C}$  NMR (100 MHz,  $\text{CDCl}_3$ )  $\delta$  189.0, 133.6, 125.9 (q,  $J = 40$  Hz), 120.5 (q,  $J = 268$  Hz), 115.9, 111.1 (q,  $J = 3$  Hz), 25.81 ppm;  $^{19}\text{F}$  NMR (400 MHz,  $\text{CDCl}_3$ )  $\delta$  -61.0 ppm; IR (neat)  $\nu = 3254, 2923, 1671, 1561, 1333, 1292, 1164, 1115, 1096, 1049, 1033, 795, 738$   $\text{cm}^{-1}$ ; HRMS (ESI-TOF) calc'd for  $\text{C}_7\text{H}_6\text{F}_3\text{NO}$  [ $\text{M} - \text{H}^+$ ]: 176.0329, found 176.0332.

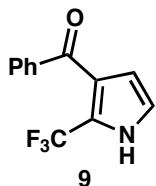

**Phenyl(2-(trifluoromethyl)-1H-pyrrol-3-yl)methanone (9).** The Standard

Procedure was followed with a reaction time of 24 h (73% conversion) to provide the product in 68% yield: white solid; m.p.: 117-120 °C;  $R_f = 0.24$  (30%

EtOAc/hexanes);  $^1\text{H NMR}$  (400 MHz,  $\text{CDCl}_3$ )  $\delta$  9.08 (s, 1 H), 8.01 – 7.78 (m, 2 H), 7.67 – 7.55 (m, 1 H), 7.53 – 7.48 (m, 2 H), 6.92 (q,  $J = 2.8$  Hz, 1 H), 6.59 – 6.54 (m, 1 H) ppm;  $^{13}\text{C NMR}$  (150 MHz,  $\text{CDCl}_3$ )  $\delta$  190.3, 138.5, 132.7, 129.8, 128.4, 124.0 (q,  $J = 2$  Hz), 122.5 (q,  $J = 39$  Hz), 120.6 (q,  $J = 268$  Hz), 118.8, 113.9 ppm;  $^{19}\text{F NMR}$  (376 MHz,  $\text{CDCl}_3$ )  $\delta$  -59.0 ppm; IR (neat)  $\nu = 3265, 2981, 1645, 1421, 1300, 1169, 1099, 1047, 1033, 885, 731$   $\text{cm}^{-1}$ ; HRMS (ESI-TOF) calc'd for  $\text{C}_{12}\text{H}_9\text{F}_3\text{NO}$  [ $\text{M} + \text{H}^+$ ] 240.0631, found 240.0627.

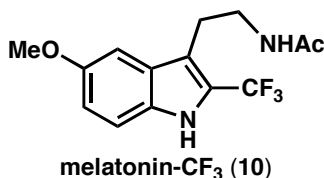

**2-Trifluoromethyl-melatonin (10).** The Standard Procedure was

followed with a reaction time of 18 hours (no second addition of reagents). Purification was accomplished by preparative HPLC (5%

to 60% MeCN in  $\text{H}_2\text{O}$ , 0.1% TFA, 25 minute ramp;  $R_T = 17.3$  min) to provide the product in 51% yield : colorless solid; m.p.: 68 - 72 °C;  $R_f = 0.68$  (EtOAc);  $^1\text{H NMR}$  (600 MHz,  $\text{CD}_3\text{OD}$ )  $\delta$  7.30 (d,  $J = 9.0$  Hz, 1 H), 7.15 (d,  $J = 2.4$  Hz, 1 H), 6.92 (dd,  $J = 9.0$  and 2.4 Hz, 1 H), 3.84 (s, 3 H), 3.41 (t,  $J = 7.1$  Hz, 2 H), 3.05 (t,  $J = 7.1$  Hz, 2 H), 1.88 (s, 3 H);  $^{13}\text{C NMR}$  (150 MHz,  $\text{CD}_3\text{OD}$ )  $\delta$  173.4, 155.9, 132.6, 128.9, 123.8 (q,  $J = 267$  Hz), 123.6 (q,  $J = 34$  Hz), 116.6, 115.0 (q,  $J = 3$  Hz), 101.4, 101.4, 56.1, 41.3, 24.9, 22.6;  $^{19}\text{F NMR}$  (376 MHz,  $\text{CD}_3\text{OD}$ )  $\delta$  -59.5; IR (neat)  $\nu = 1605, 1565, 1483, 1367, 1195, 1220, 1158, 1103, 1075, 1026, 973, 801, 523, 430$   $\text{cm}^{-1}$ ; HRMS (ESI-TOF) calc'd for  $\text{C}_{14}\text{H}_{16}\text{F}_3\text{N}_2\text{O}_2$  [ $\text{M} + \text{H}^+$ ]: 301.1158; found 301.1164.

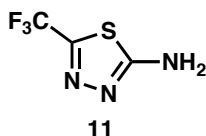

**5-Trifluoromethyl-1,3,4-thiadiazol-2-amine (11).** The Standard Procedure

was followed with a reaction time of 48 hours (second addition of

trifluoromethylsulfinate and *tert*-butylhydroperoxide after 24 h) to provide the product in 33% yield: colorless solid; m.p.: 129 - 132 °C;  $R_f = 0.72$  (EtOAc);  $^{13}\text{C}$  NMR (150 MHz,  $\text{CD}_3\text{OD}$ )  $\delta$  173.8, 146.6 (q,  $J = 40$  Hz), 121.1 (q,  $J = 274$  Hz);  $^{19}\text{F}$  NMR (376 MHz,  $\text{CD}_3\text{OD}$ )  $\delta$  -61.7; IR (neat)  $\nu = 2487, 2361, 2230, 1525, 1494, 1329, 1189, 1141, 1112, 1033, 743, 637, 620, 438, 409$   $\text{cm}^{-1}$ ; HRMS (ESI-TOF) calc'd for  $\text{C}_3\text{H}_3\text{F}_3\text{N}_3\text{S}$  [ $\text{M} + \text{H}^+$ ]: 169.9994; found 169.9996.

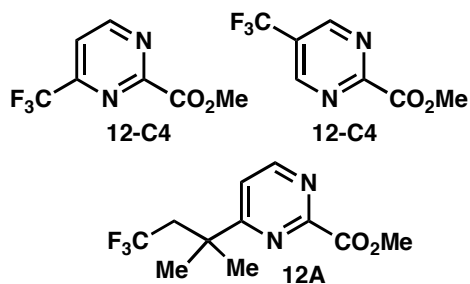

**Methyl 4-(trifluoromethyl)pyrimidine-2-carboxylate (12-C4), methyl 5-(trifluoromethyl)pyrimidine-2-carboxylate (12-C5) and methyl 4-(4,4,4-trifluoro-2-methylbutan-2-yl)pyrimidine-2-carboxylate (12A).** The Standard Procedure was followed with a reaction time of

40 hours (second addition of trifluoromethylsulfinate and *tert*-butylhydroperoxide after 16 h) to provide **12-C4** and **12-C5** in 37% yield (1:1 C4:C5) and **12A** in 10 % yield. Data for **12-C4**: white solid; m.p.: 88-90 °C;  $R_f = 0.40$  (30% EtOAc/hexanes);  $^1\text{H}$  NMR (400 MHz,  $\text{CDCl}_3$ )  $\delta$  9.21 (d,  $J = 5.0$  Hz, 1 H), 7.84 (d,  $J = 5.0$  Hz, 1 H), 4.10 (s, 3 H) ppm;  $^{13}\text{C}$  NMR (150 MHz,  $\text{CDCl}_3$ )  $\delta$  163.6, 161.2, 158.0, 157.7 (q,  $J = 38$  Hz), 120.8 (q,  $J = 276$  Hz), 119.7 (q,  $J = 3$  Hz), 54.8 ppm;  $^{19}\text{F}$  NMR (400 MHz,  $\text{CDCl}_3$ )  $\delta$  -58.5 ppm; IR (neat)  $\nu = 2927, 1740, 1563, 1392, 1326, 1143, 1023, 738, 738, 708$   $\text{cm}^{-1}$ ; HRMS (ESI-TOF) calc'd for  $\text{C}_7\text{H}_6\text{F}_3\text{N}_2\text{O}_2$  [ $\text{M} + \text{H}^+$ ]: 207.0376, found: 207.0382. Data for **12-C5**: white solid; m.p.: 129-131 °C;  $R_f = 0.62$  (30% EtOAc/hexanes);  $^1\text{H}$  NMR (400 MHz,  $\text{CDCl}_3$ )  $\delta$  9.18 (s, 2 H), 4.11 (s, 3 H) ppm;  $^{13}\text{C}$  NMR (150 MHz,  $\text{CDCl}_3$ )  $\delta$  163.5, 159.5, 156.2 (q,  $J = 4$  Hz), 127.3 (q,  $J = 35$  Hz), 122.9 (q,  $J = 273$  Hz), 54.9 ppm;  $^{19}\text{F}$  NMR (400 MHz,  $\text{CDCl}_3$ )  $\delta$  -62.7 ppm; IR (neat)  $\nu = 3074, 1742, 1581, 1446, 1395, 1340, 1308, 1221, 1148, 1125, 1099, 964, 881, 715, 666$   $\text{cm}^{-1}$ ; HRMS (ESI-TOF) calc'd for  $\text{C}_7\text{H}_6\text{F}_3\text{N}_2\text{O}_2$  [ $\text{M} + \text{H}^+$ ]: 207.0376, found 207.0378. Data for **12A**: colorless oil;  $R_f = 0.33$  (30% EtOAc/hexanes);

$^1\text{H}$  NMR (400 MHz,  $\text{CDCl}_3$ )  $\delta$  8.85 (d,  $J = 5.3$  Hz, 1 H), 7.47 (d,  $J = 5.3$  Hz, 1 H), 4.05 (s, 3 H), 2.80 (q,  $J = 11.3$  Hz, 2 H), 1.50 (s, 6H) ppm;  $^{13}\text{C}$  NMR (150 MHz,  $\text{CDCl}_3$ )  $\delta$  176.2, 164.2, 158.3, 156.2, 126.5 (q,  $J = 279$  Hz), 118.7, 53.5, 44.2 (q,  $J = 27$  Hz), 38.8, 27.6 ppm;  $^{19}\text{F}$  NMR (400 MHz,  $\text{CDCl}_3$ )  $\delta$  -61.9 ppm; IR (neat)  $\nu = 2957, 1743, 1576, 1434, 1364, 1310, 1260, 1225, 1161, 1101, 1073, 984, 763$   $\text{cm}^{-1}$ ; HRMS (ESI-TOF) calc'd for  $\text{C}_{11}\text{H}_{14}\text{F}_3\text{N}_2\text{O}_2$  [ $\text{M} + \text{H}^+$ ]: 263.1002, found: 263.1008.

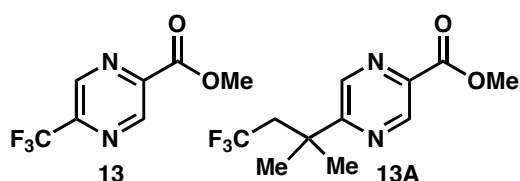

**Methyl 5-(trifluoromethyl)pyrazine-2-carboxylate (13) and methyl 5-(4,4,4-trifluoro-2-methylbutan-2-yl)pyrazine-2-carboxylate (13A).** The Standard

Procedure was followed with a reaction time of 40 hours (second addition of trifluoromethylsulfinate and *tert*-butylhydroperoxide after 16 h) to provide **13** and **13A** in 50% and 19% yield respectively. Data for **13**: white solid; m.p. 71-73  $^{\circ}\text{C}$ ;  $R_f = 0.37$  (20% EtOAc/hexanes);  $^1\text{H}$  NMR (400 MHz,  $\text{CDCl}_3$ )  $\delta$  9.41 (s, 1 H), 9.08 (s, 1 H), 4.10 (s, 3 H) ppm;  $^{13}\text{C}$  NMR (150 MHz,  $\text{CDCl}_3$ )  $\delta$  164.02, 147 (q,  $J = 36$  Hz), 146.5, 146.4, 142.1 (q,  $J = 3$  Hz), 121.5 (q,  $J = 275$  Hz), 54.5 ppm;  $^{19}\text{F}$  NMR (400 MHz,  $\text{CDCl}_3$ )  $\delta$  -58.5 ppm; IR (neat)  $\nu = 2965, 1720, 1440, 1364, 1306, 1180, 1162, 1139, 1024, 739$   $\text{cm}^{-1}$ ; HRMS (ESI-TOF) calc'd for  $\text{C}_7\text{H}_6\text{F}_3\text{N}_2\text{O}_2$  [ $\text{M} + \text{H}^+$ ]: 207.0376, found: 207.0385. Data for **13A**: white solid; m.p.: 76-78  $^{\circ}\text{C}$ ;  $R_f = 0.27$  (20% EtOAc/hexanes);  $^1\text{H}$  NMR (400 MHz,  $\text{CDCl}_3$ )  $\delta$  9.24 (s, 1 H), 8.74 (s, 1 H), 4.04 (s, 3 H), 2.75 (q,  $J = 11.3$  Hz, 2 H), 1.55 (s, 6H) ppm;  $^{13}\text{C}$  NMR (150 MHz,  $\text{CDCl}_3$ )  $\delta$  164.7, 164.6, 144.9, 140.9, 140.9, 126.4 (q,  $J = 279$  Hz), 53.2, 44.6 (q,  $J = 27$  Hz), 38.1, 27.8 ppm;  $^{19}\text{F}$  NMR (400 MHz,  $\text{CDCl}_3$ )  $\delta$  -61.9 ppm; IR (neat)  $\nu = 2958, 1726, 1437, 1363, 1282, 1258, 1146, 1100, 1069, 1029, 971, 914, 767, 740, 676$   $\text{cm}^{-1}$ ; HRMS (ESI-TOF) calc'd for  $\text{C}_{11}\text{H}_{14}\text{F}_3\text{N}_2\text{O}_2$  [ $\text{M} + \text{H}^+$ ] 263.1002, found: 263.1004.

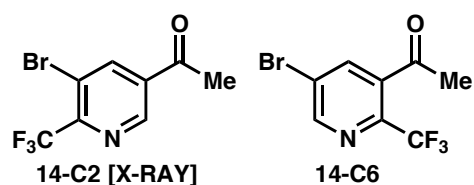

**2-Trifluoromethyl-3-bromo-5-acetylpyridine (14-C2) and 6-trifluoromethyl-3-bromo-5-acetylpyridine (14-C3).** The Standard Procedure was followed with a

reaction time of 48 hours (second addition of trifluoromethylsulfinate and *tert*-butylhydroperoxide after 24 h) to provide the products in 65% yield (1:1.5, C2:C6). Data for **14-C2**: white solid; m.p.: 91-93 °C;  $R_f = 0.45$  (20% EtOAc/hexanes);  $^1\text{H}$  NMR (400 MHz,  $\text{CDCl}_3$ )  $\delta$  9.08 (s, 1 H), 8.55 (s, 1 H), 2.68 (s, 3 H) ppm;  $^{13}\text{C}$  NMR (150 MHz,  $\text{CDCl}_3$ )  $\delta$  195.1, 149.8 (q,  $J = 34$  Hz), 147.5, 143.3, 135.7, 121.5 (q,  $J = 277$  Hz), 119.5, 27.9 ppm;  $^{19}\text{F}$  NMR (400 MHz,  $\text{CDCl}_3$ )  $\delta$  -66.6 ppm; IR (neat)  $\nu = 1711, 1360, 1288, 1223, 1142, 1086, 1050, 896, 803, 768, 684, 623, 607\text{ cm}^{-1}$ ; product did not ionize sufficiently on ESI-TOF HRMS to collect a high resolution mass spectrum. Data for **14-C6**: colorless oil;  $R_f = 0.37$  (20% EtOAc/hexanes);  $^1\text{H}$  NMR (400 MHz,  $\text{CDCl}_3$ )  $\delta$  8.96 (s, 1H), 8.50 (s, 1H), 2.57 (q,  $J = 1.0$  Hz, 3H) ppm;  $^{13}\text{C}$  NMR (150 MHz,  $\text{CDCl}_3$ )  $\delta$  199.7, 156.0, 146.6, 138.0 (q,  $J = 2$  Hz), 134.1 (q,  $J = 33$  Hz), 122.5 (q,  $J = 276$  Hz), 119.0, 32.6 (q,  $J = 2$  Hz) ppm;  $^{19}\text{F}$  NMR (400 MHz,  $\text{CDCl}_3$ )  $\delta$  -58.7 ppm; IR (neat)  $\nu = 3063, 1692, 1379, 1318, 1283, 1247, 1213, 1170, 1136, 1111, 1031, 938, 836, 768, 741, 660\text{ cm}^{-1}$ ; product did not ionize sufficiently on ESI-TOF HRMS to collect a high resolution mass spectrum.

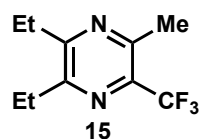

**2,3-Diethyl-5-methyl-6-(trifluoromethyl)pyrazine (15).** The Standard Procedure was followed with a reaction time of 40 hours (84% conversion, second addition of trifluoromethylsulfinate and *tert*-butylhydroperoxide after

16 h) to provide the product in 57% yield: colorless oil;  $R_f = 0.49$  (20% EtOAc/hexanes);  $^1\text{H}$  NMR (400 MHz,  $\text{CDCl}_3$ )  $\delta$  2.92 – 2.81 (m, 4 H), 2.66 (br, 3 H), 1.31 (t,  $J = 7.5$  Hz, 3 H), 1.30 (t,

$J = 7.5$  Hz, 3 H) ppm;  $^{13}\text{C}$  NMR (150 MHz,  $\text{CDCl}_3$ )  $\delta$  159.3, 153.3, 149.2, 139.2 (q,  $J = 34$  Hz), 123.2 (q,  $J = 274$  Hz), 28.4, 27.7, 21.8 (d,  $J = 2$  Hz), 13.6, 13.5 ppm;  $^{19}\text{F}$  NMR (376 MHz,  $\text{CDCl}_3$ )  $\delta$  -65.3 ppm; IR (neat)  $\nu = 2975, 1417, 1298, 1186, 1125, 1032, 733$   $\text{cm}^{-1}$ ; HRMS (ESI-TOF) calc'd for  $\text{C}_{10}\text{H}_{14}\text{F}_3\text{N}_2$  [ $\text{M} + \text{H}^+$ ] 219.1104, found 219.1101.

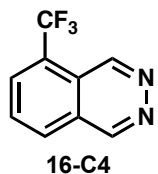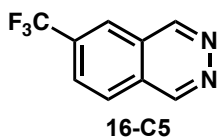

**4-Trifluoromethyl-phthalazine (16-C4), 5-Trifluoromethyl-phthalazine (16-C5).** The Standard Procedure was followed with a reaction time of 1 hour (no second addition of reagents) to

provide the products in 70% yield (2.3:1, C4:C5). The products could not readily be separated by silica gel chromatography or preparative TLC, so they were characterized as a mixture. Data for **16-C4** and **16-C5**: yellow solid; m.p.: 49 – 53 °C;  $R_f = 0.18$  ( $\text{Et}_2\text{O}$ );  $^1\text{H}$  NMR (400 MHz,  $\text{CDCl}_3$ )  $\delta$  9.86 (s, 1 H), 9.65 (s, 1 H), 9.62 (s, 1 H), 8.29 (s, 0.4 H), 8.24 (d,  $J = 7.6$  Hz, 1 H), 8.18 (d,  $J = 8.4$  Hz, 1 H), 8.15 – 8.10 (m, 1 H), 8.01 (m, 1 H) ppm;  $^{13}\text{C}$  NMR (125 MHz,  $\text{CDCl}_3$ )  $\delta$  151.2, 151.0, 151.6, 147.4, 131.6, 130.9, 130.6 (q,  $J = 5$  Hz), 128.7 (q,  $J = 3$  Hz), 127.8, 127.6, 126.9, 126.1 (q,  $J = 33$  Hz), 125.9, 124.3 (q,  $J = 4$  Hz), 123.4 (q,  $J = 275$  Hz), 122.7, C-CF<sub>3</sub> of the minor product resulted in an insufficient signal to noise ratio;  $^{19}\text{F}$  NMR (376 MHz,  $\text{CDCl}_3$ )  $\delta$  -63.3, -59.0 ppm; IR (neat)  $\nu = 3042, 1594, 1470, 1448, 1379, 1333, 1296, 1264, 1206, 1165, 1125, 1065, 999, 933, 877, 824, 770, 741, 676$   $\text{cm}^{-1}$ ; HRMS (ESI-TOF) calc'd  $\text{C}_9\text{H}_6\text{F}_3\text{N}_2$  for [ $\text{M} + \text{H}^+$ ]: 199.0478; found 199.0484.

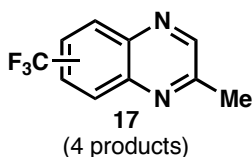

**2-Methylquinoxaline-CF<sub>3</sub> (17).** The Standard Procedure was followed with a reaction time of 16 hours to provide the products in 54% yield. The products could not be separated by silica gel chromatography or

preparative TLC, so they were characterized as a mixture. Data for **17**: orange solid; m.p.: 37 –

40 °C;  $R_f$  = 0.51 (25% EtOAc/hexanes);  $^1\text{H}$  NMR (400 MHz,  $\text{CDCl}_3$ )  $\delta$  8.87 (s, 1 H), 8.84 (s, 0.3 H), 8.83 (s, 0.1 H), 8.80 (0.3 H), 8.39 – 8.17 (m, 2 H), 8.15 – 8.03 (m, 2 H), 7.93 – 7.87 (m, 0.5 H), 7.81 – 7.70 (m, 1.8 H), 2.82 (s, 1 H), 2.82 (s, 1 H), 2.81 (s, 3 H) ppm;  $^{13}\text{C}$  NMR (150 MHz,  $\text{CDCl}_3$ )  $\delta$  156.3, 155.6, 155.0, 155.0, 148.1, 147.5, 146.8, 146.7, 143.3, 142.2, 142.1, 141.3, 140.9, 140.1, 139.4, 137.9, 133.7, 133.4, 131.8 (q,  $J$  = 33 Hz), 130.8 (q,  $J$  = 33 Hz), 130.6, 130.1, 128.7, 128.2 (q,  $J$  = 5 Hz), 127.9 (q,  $J$  = 30 Hz), 127.6 (q,  $J$  = 30 Hz), 127.5, 127.4, 127.3 (q,  $J$  = 5 Hz), 126.9 (q,  $J$  = 4 Hz), 125.8 (q,  $J$  = 3 Hz), 124.8 (q,  $J$  = 3 Hz), 123.8 (q,  $J$  = 273 Hz), 123.8 (q,  $J$  = 273 Hz), 123.7 (q,  $J$  = 272 Hz), 23.1, 22.9, 22.8, 22.7 ppm;  $\text{CF}_3$  of the minor product resulted in an insufficient signal to noise ratio;  $^{19}\text{F}$  NMR (376 MHz,  $\text{CDCl}_3$ )  $\delta$  -60.0, -60.1, -62.8, -62.9 ppm; IR (neat)  $\nu$  = 2936, 1574, 1495, 1350, 1325, 1308, 1258, 1187, 1135, 1062, 1021, 981, 928, 838, 772, 740, 706  $\text{cm}^{-1}$ ; HRMS (ESI-TOF) calc'd for  $\text{C}_{10}\text{H}_8\text{F}_3\text{N}_2$  [ $\text{M} + \text{H}^+$ ]: 213.0634; found 213.0627.

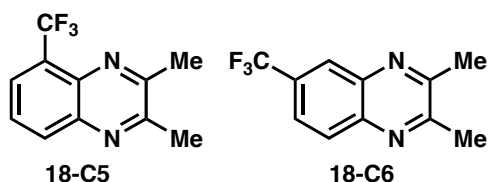

**2,3-Dimethyl-5-(trifluoromethyl)quinoxaline (18-C5),**  
**2,3-dimethyl-6-(trifluoromethyl)quinoxaline (18-C6).**

The Standard Procedure was followed with a reaction time of 19 hours (no second addition of reagents) to provide the products in 64% yield (2:1, C5:C6). Data for **18-C5**: yellow crystalline solid; m.p.: 54 – 57 °C;  $R_f$  = 0.42 (50% DCM/hexanes);  $^1\text{H}$  NMR (600 MHz,  $\text{CDCl}_3$ )  $\delta$  8.15 (d,  $J$  = 7.8 Hz, 1 H), 8.00 (d,  $J$  = 7.8 Hz, 1 H), 7.68 (dd,  $J$  = 7.8 and 7.8 Hz, 1 H), 2.78 (s, 3 H), 2.74 (s, 3 H) ppm;  $^{13}\text{C}$  NMR (150 MHz,  $\text{CDCl}_3$ )  $\delta$  154.7, 154.6, 141.1, 138.3, 132.9, 127.5, 127.3, 127.0 (q,  $J$  = 5.5 Hz), 123.1 (q,  $J$  = 272.1 Hz), 23.7, 23.3 ppm;  $^{19}\text{F}$  NMR (376 MHz,  $\text{CDCl}_3$ )  $\delta$  -59.9 ppm; IR (neat)  $\nu$  = 1585, 1486, 1402, 1350, 1319, 1297, 1215, 1135, 1057, 997, 947, 858, 835, 770, 734, 714, 697, 677  $\text{cm}^{-1}$ ; HRMS (ESI-TOF) calc'd for  $\text{C}_{11}\text{H}_{10}\text{F}_3\text{N}_2$  [ $\text{M} + \text{H}^+$ ]: 227.0791; found 227.0799. Data for **18-C6**:

yellow crystalline solid; m.p.: 56 – 58 °C;  $R_f$  = 0.24 (50% DCM/hexanes);  $^1\text{H}$  NMR (400 MHz,  $\text{CDCl}_3$ )  $\delta$  8.29 (s, 1 H), 8.08 (d,  $J$  = 8.6 Hz, 1 H), 7.84 (d,  $J$  = 8.6 Hz, 1 H), 2.77 (s, 3 H), 2.76 (s, 3 H) ppm;  $^{13}\text{C}$  NMR (150 MHz,  $\text{CDCl}_3$ )  $\delta$  156.0, 155.4, 142.4, 140.2, 130.7, 129.7, 126.5 (q,  $J$  = 4 Hz), 124.7 (q,  $J$  = 3 Hz), 124.0 (q,  $J$  = 273 Hz), 23.5, 23.4 ppm;  $^{19}\text{F}$  NMR (376 MHz,  $\text{CDCl}_3$ )  $\delta$  -62.7 ppm; IR (neat)  $\nu$  = 1434, 1153, 1111, 846, 694  $\text{cm}^{-1}$ ; HRMS (ESI-TOF) calc'd for  $\text{C}_{11}\text{H}_{10}\text{F}_3\text{N}_2$  [ $\text{M} + \text{H}^+$ ]: 227.0791; found 227.0798.

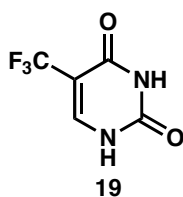

**Uracil- $\text{CF}_3$  (19).** The Standard Procedure was followed with a reaction time of 16 h (no second addition of reagents) to provide the product in 87 % yield: white solid; m.p.: 243-245 °C;  $R_f$  = 0.67 (EtOAc);  $^1\text{H}$  NMR (400 MHz,  $\text{CD}_3\text{OD}$ )  $\delta$  7.94 (s, 1 H) ppm;  $^{13}\text{C}$  NMR (150 MHz,  $\text{CD}_3\text{OD}$ )  $\delta$  162.1, 152.5, 144.8 (q,  $J$  = 6 Hz), 124.0 (q,  $J$  = 268 Hz), 104.8 (q,  $J$  = 33 Hz) ppm;  $^{19}\text{F}$  NMR (376 MHz,  $\text{CD}_3\text{OD}$ )  $\delta$  -65.1 ppm; IR (neat)  $\nu$  = 3214, 2925, 1687, 1436, 1336, 1257, 1190, 1132, 1053, 1033, 794  $\text{cm}^{-1}$ ; HRMS (ESI-TOF) calc'd for  $\text{C}_5\text{H}_2\text{F}_3\text{N}_2\text{O}_2$  [ $\text{M} - \text{H}^+$ ]: 179.0074; found 179.0071.

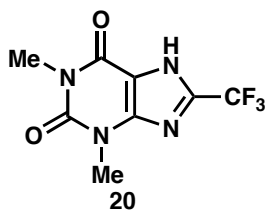

**Theophylline- $\text{CF}_3$  (20).** The Standard Procedure was followed with a reaction time of 17 h (no second addition of reagents) to provide the product in 96% yield as a white solid; m.p.: 234-237 °C;  $R_f$  = 0.36 (EtOAc);  $^1\text{H}$  NMR (400 MHz,  $\text{CD}_3\text{OD}$ )  $\delta$  3.55 (s, 3 H), 3.37 (s, 3 H) ppm;  $^{13}\text{C}$  NMR (150 MHz,  $\text{CD}_3\text{OD}$ )  $\delta$  159.5, 153.8, 150.2, 145.4 (q,  $J$  = 38 Hz), 121.6 (q,  $J$  = 269 Hz), 116.0, 30.8, 28.4 ppm;  $^{19}\text{F}$  NMR (376 MHz,  $\text{CD}_3\text{OD}$ )  $\delta$  -64.7 ppm; IR (neat)  $\nu$  = 3484, 2965, 1695, 1640, 1272, 1160, 1114, 1061, 1033, 751  $\text{cm}^{-1}$ ; HRMS (ESI-TOF) calc'd for  $\text{C}_8\text{H}_8\text{F}_3\text{N}_4\text{O}_2$  [ $\text{M} + \text{H}^+$ ]: 249.0594, found 249.0592.



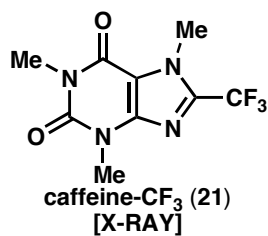

**Caffeine-CF<sub>3</sub> (21).** The Standard Procedure was followed with a reaction time of 40 hours (no second addition of reagents) to provide the product in 80% yield: white solid;  $R_f = 0.23$  (25% EtOAc/hexanes); <sup>1</sup>H NMR (400 MHz, CDCl<sub>3</sub>) δ 4.13 (s, 3 H), 3.55 (s, 3 H), 3.38 (s, 3 H) ppm; <sup>13</sup>C NMR (125 MHz, CDCl<sub>3</sub>) δ 155.5, 151.4, 146.6, 139.0 (q,  $J = 40$  Hz), 118.3 (q,  $J = 270$  Hz), 109.7, 33.3 (q,  $J = 2$  Hz), 30.0, 28.3 ppm; <sup>19</sup>F NMR (376 MHz, CDCl<sub>3</sub>) δ -62.7 ppm; IR (neat)  $\nu = 3378, 2958, 1710, 1661, 1611, 1553, 1511, 1459, 1404, 1367, 1346, 1252, 1210, 1181, 1145, 1127, 1100, 1022, 978, 821, 761, 745, 732, 710, 683$  cm<sup>-1</sup>; HRMS (ESI-TOF) calc'd for C<sub>9</sub>H<sub>10</sub>F<sub>3</sub>N<sub>4</sub>O<sub>2</sub> [M + H<sup>+</sup>]: 263.0750; found 263.0753.

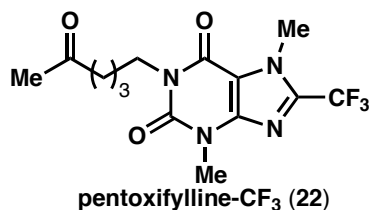

**2-Trifluoromethyl-pentoxifylline (22).** The Standard Procedure was followed with a reaction time of 48 hours (second addition of trifluoromethylsulfinate and *tert*-butylhydroperoxide after 24 h) to provide the product in 47% yield: colorless solid; m.p.: 67 - 69 °C;  $R_f = 0.16$  (33% EtOAc/hexanes); <sup>1</sup>H NMR (600 MHz, CDCl<sub>3</sub>) δ 4.14 (s, 3 H), 4.01 (t,  $J = 7.1$  Hz, 2 H), 3.57 (s, 3 H), 2.49 (t,  $J = 7.1$  Hz, 2 H), 2.13 (s, 3 H), 1.69 – 1.60 (m, 4 H); <sup>13</sup>C NMR (150 MHz, CDCl<sub>3</sub>) δ 208.7, 155.4, 151.2, 146.7, 139.1 (q,  $J = 40$  Hz), 118.3 (q,  $J = 272$  Hz), 109.8, 43.2, 41.3, 33.3 (q,  $J = 2$  Hz), 30.1, 30.0, 27.4, 21.0; <sup>19</sup>F NMR (376 MHz, CDCl<sub>3</sub>) δ -62.6; IR (neat)  $\nu = 1712, 1652, 1608, 1545, 1459, 13796, 1245, 1203, 1129, 1099, 748, 600, 474$  cm<sup>-1</sup>; HRMS (ESI-TOF) calc'd for C<sub>14</sub>H<sub>18</sub>F<sub>3</sub>N<sub>4</sub>O<sub>3</sub> [M + H<sup>+</sup>]: 347.1326; found 347.1330.

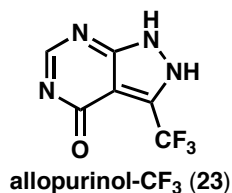

**Allopurinol-CF<sub>3</sub> (23).** The Standard Procedure was followed with a reaction time of 40 hours (second addition of trifluoromethylsulfinate and *tert*-butylhydroperoxide after 16 h) to provide the product in 76%: white

solid; m.p.: 300-303 °C;  $R_f$  = 0.51 (EtOAc);  $^1\text{H}$  NMR (400 MHz,  $\text{CD}_3\text{OD}$ )  $\delta$  8.08 (s, 1 H) ppm;  $^{13}\text{C}$  NMR (150 MHz,  $\text{CD}_3\text{OD}$ )  $\delta$  158.0, 156.5, 150.1, 138.9 (d,  $J$  = 40 Hz), 121.9 (q,  $J$  = 268 Hz), 103.9 ppm;  $^{19}\text{F}$  NMR (376 MHz,  $\text{CD}_3\text{OD}$ )  $\delta$  -64.0 ppm; IR (neat)  $\nu$  = 2982, 1736, 1373, 1253, 1044, 1033, 1017, 847  $\text{cm}^{-1}$ ; HRMS (ESI-TOF) calc'd for  $\text{C}_6\text{H}_4\text{F}_3\text{N}_4\text{O}$  [ $\text{M} + \text{H}^+$ ]: 205.0332; found 205.0338.

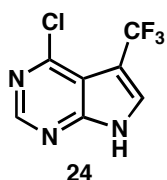

**4-Chloro-5-(trifluoromethyl)-7H-pyrrolo[2,3-d]pyrimidine (24).** The Standard Procedure was followed with a reaction time of 61 hours to provide the product in 43% yield: colorless solid; m.p.: 52 – 56 °C;  $R_f$  = 0.75 (50%

EtOAc/hexanes);  $^1\text{H}$  NMR (400 MHz,  $\text{CDCl}_3$ )  $\delta$  13.24 (br s, 1 H), 8.83 (s, 1 H), 7.10 (s, 1 H) ppm;  $^{13}\text{C}$  NMR (150 MHz,  $\text{CDCl}_3$ )  $\delta$  155.7, 152.4, 151.6, 128.5 (q,  $J$  = 41 Hz), 120.5 (q,  $J$  = 268 Hz), 117.5, 101.7 (q,  $J$  = 3 Hz) ppm;  $^{19}\text{F}$  NMR (376 MHz,  $\text{CDCl}_3$ )  $\delta$  -61.8 ppm; IR (neat)  $\nu$  = 1572, 1313, 1222, 1191, 1126, 987, 872  $\text{cm}^{-1}$ ; HRMS (ESI-TOF) calc'd for  $\text{C}_7\text{H}_4\text{ClF}_3\text{N}_3$  [ $\text{M} + \text{H}^+$ ] 222.0040; found 222.0049.

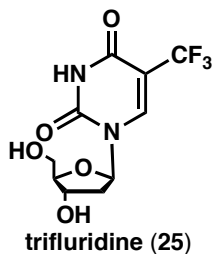

**Trifluridine (25).** The Standard Procedure (with 1 ml water and without organic solvent) was followed with a reaction time of 6 hours (no second addition of reagents) to provide the product in 57% yield: colorless solid; m.p.: 181 °C (decomposition);  $R_f$  = 0.45 (EtOAc);  $^1\text{H}$  NMR (600 MHz,

$\text{CD}_3\text{CN}$ )  $\delta$  9.28 (s, 1 H), 8.65 (s, 1 H), 6.11 (t,  $J$  = 6.0 Hz, 1 H), 4.37 – 4.33 (m, 1 H), 3.90 (m, 1 H), 3.78 (ddd,  $J$  = 11.9, 4.6, and 2.9 Hz, 1 H), 3.70 (ddd,  $J$  = 11.9, 4.6, and 2.9 Hz, 1 H), 3.38 (d,  $J$  = 4.5 Hz, 1 H), 3.29 (t,  $J$  = 4.6 Hz, 1 H), 2.29 (ddd,  $J$  = 13.7, 6.0, and 5.0 Hz, 1 H), 2.24 – 2.19 (m, 1 H);  $^{13}\text{C}$  NMR (150 MHz,  $\text{CD}_3\text{CN}$ )  $\delta$  159.9, 150.5, 143.4 (q,  $J$  = 6 Hz), 123.8 (q,  $J$  = 269 Hz), 104.4 (q,  $J$  = 32 Hz), 88.6, 87.0, 70.7, 61.5, 41.7;  $^{19}\text{F}$  NMR (376 MHz,  $\text{CD}_3\text{CN}$ )  $\delta$  -63.8

ppm; IR (neat)  $\nu$  = 3391, 3062, 1727, 1670, 1479, 1273, 1121, 1097, 1038, 874, 626, 597, 565, 535, 439  $\text{cm}^{-1}$ ; HRMS (ESI-TOF) calc'd for  $\text{C}_{10}\text{H}_{12}\text{F}_3\text{N}_2\text{O}_5$  [ $\text{M} + \text{H}^+$ ]: 297.0693; found 297.0694.

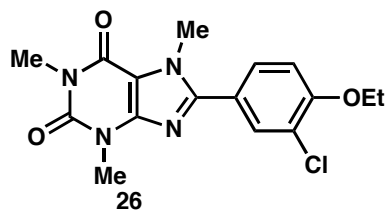

**(3-Chloro-4-ethoxyphenyl)-caffeine (26).** To a solution of caffeine (0.25 mmol, 1.0 equiv) in DCM (1.25 mL) was added trifluoroacetic acid (19  $\mu\text{L}$ , 0.25 mmol, 1.0 equiv) followed by 3-chloro-4-ethoxyphenylboronic acid (0.38 mmol, 1.5 equiv).

Water (0.75 mL) was then added, followed by silver (I) nitrate (8.5 mg, 0.05 mmol, 0.2 equiv) in water (0.50 mL). Potassium persulfate (202 mg, 0.75 mmol, 3.0 equiv) was then added and the solution was stirred vigorously at room temperature and monitored by thin-layer chromatography of the organic layer. After 3 hours, a second addition of solid silver(I)nitrate (8.5 mg, 0.05 mmol, 0.2 equiv) and potassium persulfate (202 mg, 0.75 mmol, 3.0 equiv) was performed. After 19 hours, the reaction was diluted with DCM (3 mL) and washed with 5% sodium bicarbonate. The layers were separated, and the aqueous layer was extracted with DCM (3 x 4 mL), dried over sodium sulfate, and evaporated *in vacuo*. Purification was performed by silica gel chromatography to provide the product in 63% yield: colorless solid;  $R_f$  = 0.44 (50% EtOAc/hexanes); m.p.: 205 – 209  $^{\circ}\text{C}$ ;  $^1\text{H}$  NMR (500 MHz,  $\text{CDCl}_3$ )  $\delta$  7.74 (d,  $J$  = 2.2 Hz, 1 H), 7.54 (dd,  $J$  = 8.7 and 2.2 Hz, 1 H), 7.02 (d,  $J$  = 8.7 Hz, 1 H), 4.18 (q,  $J$  = 7.0 Hz, 2 H), 4.05 (s, 3 H), 3.61 (s, 3 H), 3.42 (s, 3 H), 1.50 (t,  $J$  = 7.0 Hz, 3 H) ppm;  $^{13}\text{C}$  NMR (125 MHz,  $\text{CDCl}_3$ )  $\delta$  156.2, 155.6, 151.8, 150.9, 148.4, 131.1, 128.8, 123.7, 121.4, 113.1, 108.9, 65.1, 34.1, 29.9, 28.1, 14.7 ppm; IR (neat)  $\nu$  = 1697, 1656, 1456, 747  $\text{cm}^{-1}$ ; HRMS (ESI-TOF) calc'd for  $\text{C}_{16}\text{H}_{18}\text{ClN}_4\text{O}_3$  [ $\text{M} + \text{H}^+$ ] 349.1062; found 349.1074.

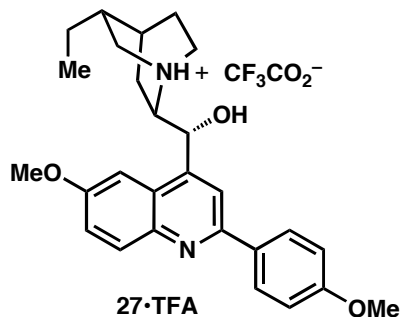

**2-(4-Methoxyphenyl)-dihydroquinine (27).** To a solution of dihydroquinine (41 mg, 0.125 mmol, 1.0 equiv) in dichloromethane/water (0.6/0.4 mL) was added trifluoroacetic acid (19  $\mu$ L, 0.25 mmol, 2.0 equiv) followed by 4-methoxyphenylboronic acid (38 mg, 0.19 mmol, 1.5 equiv), silver(I)nitrate (4.3 mg, 0.025 mmol, 0.2 equiv) and ammonium persulfate (87 mg, 0.38 mmol, 3.0 equiv). The solution was stirred vigorously at room temperature for 3h (89% conv.), and the solvent was removed under reduced pressure. Purification was accomplished by preparative HPLC (10% to 45% MeCN in water, 0.1% TFA, 25 minute ramp;  $R_T$  for **27•TFA** = 17.7 min) to afford the product in 48% yield. The product was free-based for characterization (due to broadened signals in the salt form): white solid; m.p.: 98-100  $^{\circ}$ C;  $^1\text{H}$  NMR (400 MHz,  $\text{CDCl}_3$ )  $\delta$  8.07 – 8.01 (m, 3 H), 7.91 (s, 1 H), 7.33 (ddd,  $J$  = 9.2, 2.5 and 1.0 Hz, 1 H), 7.13 (s, 1 H), 7.00 (d,  $J$  = 7.9 Hz, 2 H), 5.64 (s, 1 H), 3.90 (s, 3 H), 3.89 (s, 3 H), 3.70 – 3.54 (m, 1 H), 3.21 – 3.06 (m, 2 H), 2.81 – 2.66 (m, 1 H), 2.50 – 2.40 (m, 1 H), 1.82 (br, 3 H), 1.56 – 1.39 (m, 3 H), 1.32 – 1.14 (m, 3 H), 0.81 (t,  $J$  = 7.4 Hz, 3 H) ppm;  $^{13}\text{C}$  NMR (100 MHz,  $\text{CDCl}_3$ )  $\delta$  160.6, 157.6, 154.3, 147.6, 144.4, 132.4, 131.7, 128.7, 125.1, 121.8, 115.9, 114.2, 101.1, 71.6, 59.9, 58.5, 55.9, 55.5, 43.6, 37.4, 27.9, 27.7, 25.5, 20.8, 12.1 ppm; IR (neat)  $\nu$  = 3345, 1654, 1431, 1181, 1126, 722  $\text{cm}^{-1}$ ; HRMS (ESI-TOF) calc'd for  $\text{C}_{27}\text{H}_{33}\text{N}_2\text{O}_3$  [ $\text{M} + \text{H}^+$ ]: 433.2486, found 433.2491.

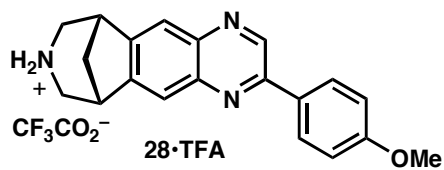

**(4-methoxyphenyl)-varenicline•TFA (28•TFA).** To a solution of varenicline (0.25 mmol, 1.0 equiv) in DCM (1.25 mL) was added trifluoroacetic acid (57  $\mu$ L, 0.75 mmol, 3.0 equiv) followed by 4-methoxyphenylboronic acid (0.38 mmol, 1.5 equiv). Water (0.75 mL) was then added, followed by silver (I) nitrate (17 mg, 0.1 mmol, 0.4 equiv) in water (1.00 mL).

Potassium persulfate (202 mg, 0.75 mmol, 3.0 equiv) was then added and the solution was stirred vigorously at room temperature and monitored by thin-layer chromatography of the organic layer. After 16 hours, the reaction was diluted with a solution of 20% MeOH in DCM (3 mL) and washed with 5% sodium bicarbonate. The layers were separated, and the aqueous layer was extracted with a solution of 20% MeOH in DCM (3 mL), dried over sodium sulfate, and evaporated *in vacuo*. Purification was accomplished by preparative HPLC (5% to 50% MeCN in H<sub>2</sub>O, 0.1% TFA, 30 minute ramp; R<sub>T</sub> = 17.3 min) to provide the product in 45% yield: yellow solid; m.p.: 229 - 234 °C; R<sub>f</sub> = 0.47 (10% MeOH/DCM); <sup>1</sup>H NMR (600 MHz, D<sub>2</sub>O) δ 8.73 (s, 1 H), 7.72 (s, 1 H), 7.69 (s, 1 H), 7.65 (d, *J* = 8.6 Hz, 2 H), 6.86 (d, *J* = 8.6 Hz, 2 H), 3.78 (s, 3 H), 3.58 (br, 1 H), 3.53 (br, 1 H), 3.49 (d, *J* = 12.2 Hz, 1 H), 3.48 (d, *J* = 12.6 Hz, 1 H), 3.31 (d, *J* = 12.6 Hz, 1 H), 3.27 (d, *J* = 12.2 Hz, 1 H), 2.33 (m, 1 H), 2.18 (d, *J* = 11.6 Hz, 1 H) ppm; <sup>13</sup>C NMR (150 MHz, D<sub>2</sub>O) δ 163.4 (q, *J* = 36 Hz), 162.4, 150.6, 148.5, 147.1, 142.3, 140.7, 139.2, 130.1, 126.4, 122.5, 122.3, 116.9 (q, *J* = 290 Hz), 115.4, 56.1, 48.0, 40.7, 39.2, 39.1, 30.9 ppm; IR (neat) ν = 3387, 2924, 2473, 1673, 1609, 1456, 1205, 1055, 1033, 670, 571, 542, 537, 526, 524 cm<sup>-1</sup>; HRMS (ESI-TOF) calc'd for C<sub>20</sub>H<sub>20</sub>N<sub>3</sub>O [M + H<sup>+</sup>]: 318.1601; found 318.1609.

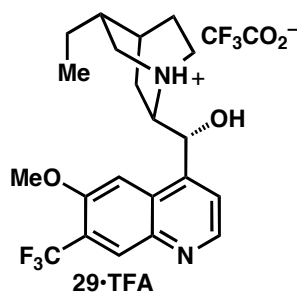

**Dihydroquinine-CF<sub>3</sub>•TFA (29•TFA).** The Standard Procedure was followed with a reaction time of 16h (1 equiv. of TFA added; 89% conversion; no second addition of reagents). The solvent was removed under reduced pressure and purification was accomplished by preparative HPLC (10% to 45% MeCN in water, 0.1% TFA, 25 minute ramp; R<sub>T</sub> for **7•TFA** = 22.3 min) . to provide **29•TFA** in 50% yield: colorless oil; <sup>1</sup>H NMR (400 MHz, CD<sub>3</sub>OD) δ 8.93 (d, *J* = 4.8 Hz, 1 H), 8.37 (s, 1 H), 8.02 (d, *J* = 4.8 Hz, 1 H), 7.62 (s, 1 H), 6.02 (s, 1 H), 4.29 – 4.17 (m, 1 H), 4.13 (s, 3 H), 3.73 – 3.65 (m, 1 H), 3.61 (dd, *J* = 12.7 and

10.6 Hz, 1 H), 3.03 (ddd,  $J = 12.7, 5.9$  and  $2.7$  Hz, 1 H), 2.32 – 2.17 (m, 2 H), 2.13 – 2.08 (m, 1 H), 2.04 – 1.84 (m, 3 H), 1.67 – 1.57 (m, 1 H), 1.44 – 1.28 (m, 2 H), 0.86 (t,  $J = 7.4$  Hz, 3 H) ppm;  $^{13}\text{C}$  NMR (150 MHz,  $\text{CD}_3\text{OD}$ )  $\delta$  160.5 (q,  $J = 38$  Hz), 156.5, 148.8, 148.3, 140.7, 129.2, 128.3, 124.7 (q,  $J = 32$  Hz), 123.6 (q,  $J = 273$  Hz), 122.2, 116.6 (d,  $J = 286$  Hz), 103.5, 68.0, 60.6, 57.0, 56.9, 44.8, 36.0, 26.8, 25.3, 25.1, 18.5, 11.2 ppm; IR (neat)  $\nu = 3345, 2981, 1654, 1431, 1181, 1126, 839, 799, 722$   $\text{cm}^{-1}$ ; HRMS (ESI-TOF) calc'd for  $\text{C}_{21}\text{H}_{26}\text{F}_3\text{N}_2\text{O}_2$  [ $\text{M} + \text{H}^+$ ]: 433.2486, found 433.2491.

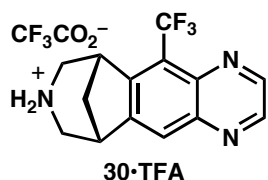

**5-Trifluoromethyl-varenicrine (30-C5) and 2-Trifluoromethyl-varenicrine (30-C2).** The tartrate salt of varenicrine was used in this reaction as obtained from Pfizer. The Standard Procedure was followed

with a reaction time of 18 hours (no second addition of reagents) to provide the product in 50% yield (4:1 C5:C2). Purification was accomplished by preparative HPLC (4% to 50% MeCN in  $\text{H}_2\text{O}$ , 0.1% TFA, 25 minute ramp;  $R_T$  for **30-C5** = 21.3 min;  $R_T$  for **30-C2** = 24.7). Data for **30-C5**: colorless solid; m.p.: 176 °C (decomposition);  $R_f = 0.58$  (10%  $\text{Et}_3\text{N}/\text{EtOAc}$ );  $^1\text{H}$  NMR (600 MHz,  $\text{D}_2\text{O}$ )  $\delta$  8.83 (d,  $J = 2.0$  Hz, 1 H), 8.80 (d,  $J = 2.0$  Hz, 1 H), 8.12 (s, 1 H), 4.04 (s, 1 H), 3.65 (s, 1 H), 3.49 (dd,  $J = 12.7$  and  $1.4$  Hz, 1 H), 3.46 (dd,  $J = 12.6$  and  $1.3$  Hz, 1 H), 3.38 – 3.34 (m, 1 H), 3.31 – 3.27 (m, 1 H), 2.39 – 2.34 (m, 1 H), 2.16 (d,  $J = 12.1$  Hz, 1 H);  $^{13}\text{C}$  NMR (150 MHz,  $\text{D}_2\text{O}$ )  $\delta$  163.7 (q,  $J = 37$  Hz), 147.1, 146.4, 145.9, 145.9, 143.0, 140.4, 128.2, 124.8 (q,  $J = 272$  Hz), 123.2 (q,  $J = 30$  Hz), 117.1 (q,  $J = 291$  Hz), 47.94, 47.60, 40.00, 39.6 (q,  $J = 4$  Hz), 38.69;  $^{19}\text{F}$  NMR (376 MHz,  $\text{D}_2\text{O}$ )  $\delta$  -55.5, -75.8 ppm; IR (neat)  $\nu = 2970, 1672, 1458, 1340, 1229, 1179, 1129, 1086, 961, 939, 797, 752, 719, 444$   $\text{cm}^{-1}$ ; HRMS (ESI-TOF) calc'd for  $\text{C}_{14}\text{H}_{13}\text{F}_3\text{N}_3$  [ $\text{M} + \text{H}^+$ ]: 280.1056; found 280.1060. Data for **30-C2**: colorless solid; m.p.: 194 °C (decomposition);  $R_f = 0.60$  (10%  $\text{Et}_3\text{N}/\text{EtOAc}$ );  $^1\text{H}$  NMR (600 MHz,  $\text{D}_2\text{O}$ )  $\delta$  9.14 (s, 1 H), 8.05

(s, 1 H), 8.02 (s, 1 H), 3.66 (br, 2 H), 3.48 – 3.44 (m, 2 H), 3.33 – 3.29 (m, 2 H), 2.45 – 2.39 (m, 1 H), 2.15 (d,  $J = 11.9$  Hz, 1 H);  $^{13}\text{C}$  NMR (150 MHz,  $\text{D}_2\text{O}$ )  $\delta$  163.8 (q,  $J = 36$  Hz), 149.7, 148.7, 144.5 (q,  $J = 1$  Hz), 142.8 (q,  $J = 36$  Hz), 141.9, 141.6 (q,  $J = 3$  Hz), 124.3, 124.1, 121.7 (q,  $J = 275$  Hz), 48.2, 48.2, 40.7, 39.3, 39.2;  $^{19}\text{F}$  NMR (376 MHz,  $\text{D}_2\text{O}$ )  $\delta$  -67.2, -75.8 ppm; IR (neat)  $\nu = 2973, 1672, 1476, 1322, 1209, 1149, 1111, 1030, 984, 835, 719, 457$   $\text{cm}^{-1}$ ; HRMS (ESI-TOF) calc'd for  $\text{C}_{14}\text{H}_{13}\text{F}_3\text{N}_3$  [ $\text{M} + \text{H}^+$ ]: 280.1056; found 280.1060.

***In Situ* Reaction Calorimetric Monitoring.** Measurements were performed in an Omnical Insight-CPR-220 reaction calorimeter which allows for continuous monitoring of the instantaneous heat absorbed or released by a chemical reaction taking place within the reaction vessel. Reaction vessels were septum-capped vials equipped with stirbars (in cases of stirring).

**Aqueous Reaction:** 4-acetylpyridine (0.25 mmol, 1.0 equiv) and sodium trifluoromethylsulfinate (0.75 mmol, 3.0 equiv) were combined in 1.4 mL of H<sub>2</sub>O at room temperature and stirred at 600 rpm. *Tert*-butylhydrogenperoxide (70% solution in water, 1.25 mmol, 5.0 equiv) was added to the stirred mixture via syringe.

**Well-Mixed No Substrate:** Sodium trifluoromethylsulfinate (0.75 mmol, 3.0 equiv) was dissolved in a mixture of dichloromethane/water (1.0 mL/0.4 mL) at room temperature and stirred at 600 rpm. *Tert*-butylhydrogenperoxide (70% solution in water, 1.25 mmol, 5.0 equiv) was added to the stirred mixture via syringe.

**Well-Mixed Substrate:** 4-acetylpyridine (0.25 mmol, 1.0 equiv) and sodium trifluoromethylsulfinate (0.75 mmol, 3.0 equiv) were combined in mixture of dichloromethane/water (1.0 mL/0.4 mL) at room temperature and stirred at 600 rpm. *Tert*-butylhydrogenperoxide (70% solution in water, 1.25 mmol, 5.0 equiv) was added to the stirred mixture via syringe.

**Unstirred Substrate:** 4-acetylpyridine (0.25 mmol, 1.0 equiv) and *tert*-butylhydrogenperoxide (70% solution in water, 1.25 mmol, 5.0 equiv). Sodium trifluoromethylsulfinate (0.75 mmol, 3.0 equiv) was dissolved in 0.4 mL of water and carefully layered on top of the dichloromethane solution of arene and peroxide. The mixture was allowed to react undisturbed in the reaction calorimeter.



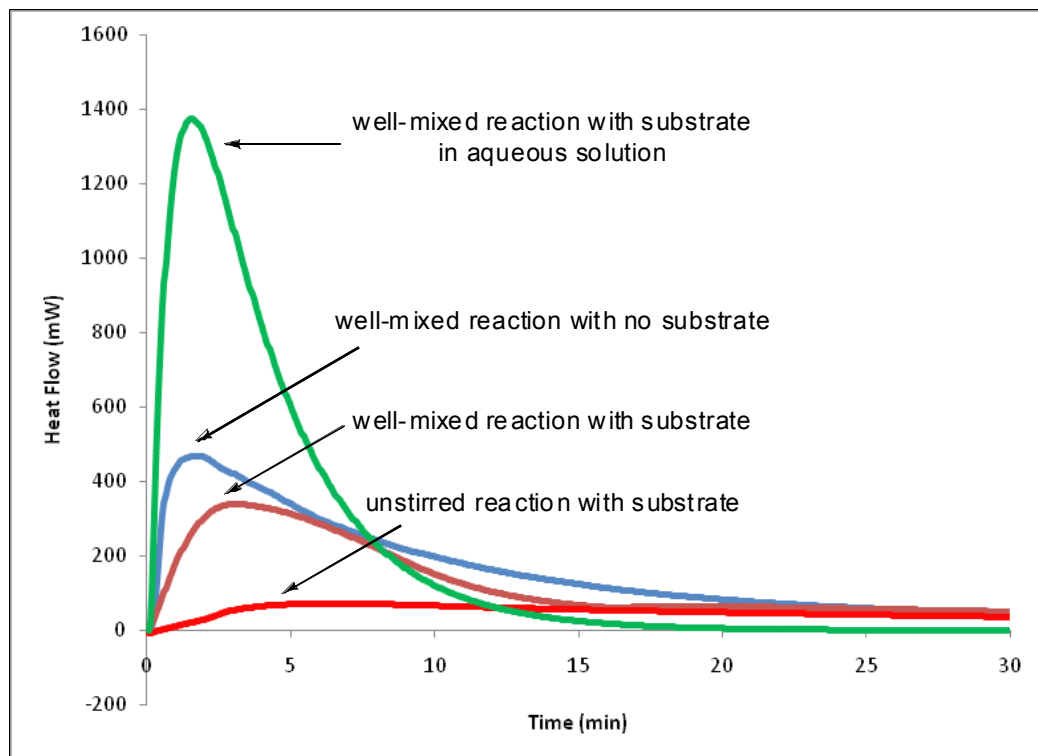

**GC Analysis of Reaction Progression and Conversion.** The trifluoromethylation of 4-acetylpyridine was examined under various conditions. To simplify the analysis of reaction progressions, the following procedure was utilized: 4-acetylpyridine (0.25 mmol, 1.0 equiv) was combined with *tert*-butylhydrogenperoxide (70% solution in water, 1.25 mmol, 5.0 equiv) and tetradecane (10  $\mu$ L, 0.04 mmol) in 1.0 mL of dichloromethane. A solution of trifluoromethylsulfinate (0.75 mmol, 3.0 equiv) in 0.4 mL of water was then added dropwise to the dichloromethane solution (stirred between 0-600 rpm). Small aliquots ( $\sim$ 20  $\mu$ L) were removed from the organic layer at timed intervals, quenched in 1 mL of NaHCO<sub>3</sub> (sat.) and extracted with 2 mL of dichloromethane for GC analysis.

## Product Calibration

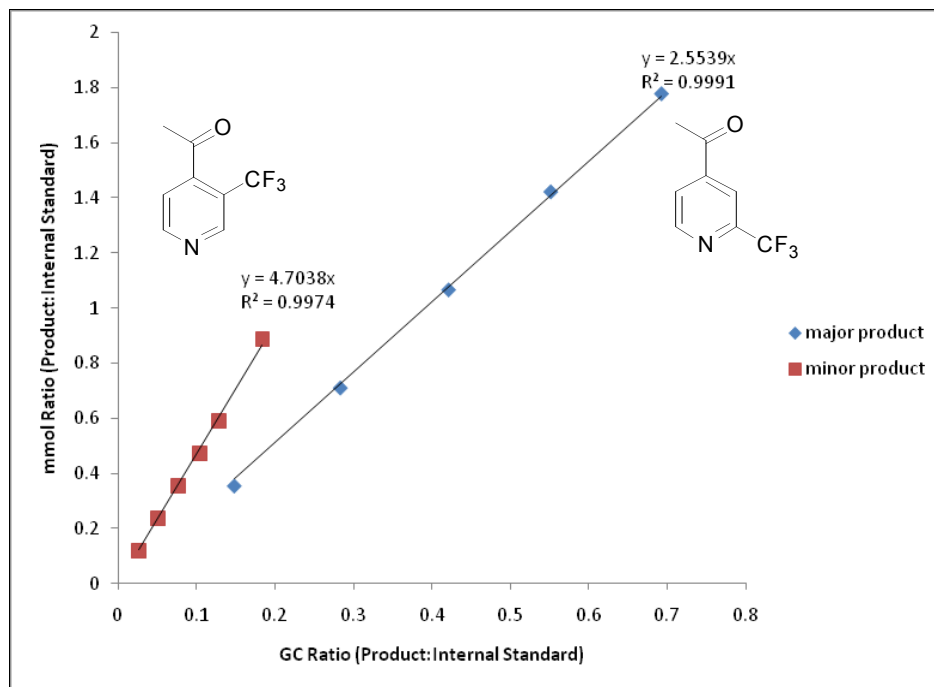

## Starting Material Calibration

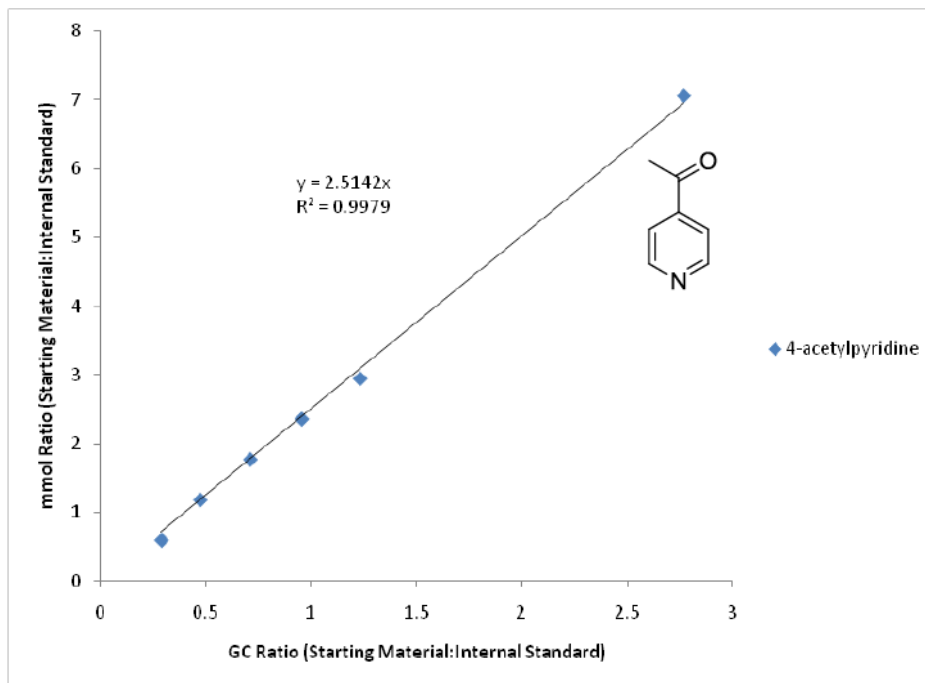

**NMR Analysis of Arene Phase Partitioning.** Because the trifluoromethylation likely occurs at the interface of the biphasic mixture, the improved conversion obtained when the reaction is not well-mixed may be attributed to the suppression of degradation pathways available to the sulfinate and peroxide when combined directly in the aqueous phase. NMR spectroscopy shows that the trifluoromethylated products do not enter the aqueous phase, although the peroxide and the arene pass from the organic into the aqueous layer. The disappearance of arene from the organic phase is thus due to both phase partitioning and consumption to product, as shown below.

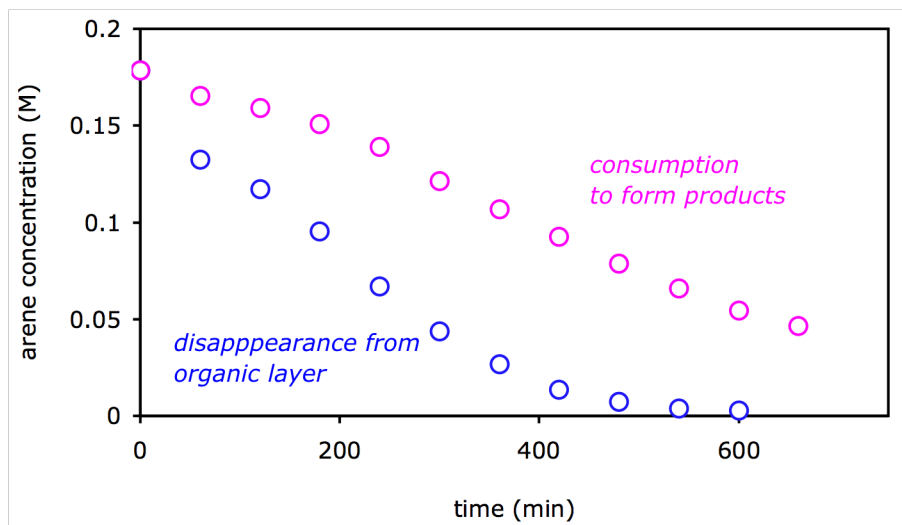

Arene concentration in the organic phase in the unstirred two-phase reaction shown in Table 1 using 0.18 M arene, 5.0 equiv. <sup>t</sup>BuOOH, 3.0 equiv. CF<sub>3</sub>SO<sub>2</sub>Na in (DCM:H<sub>2</sub>O 2.5:1).

**EPR Evidence for Free Radical Generation:** EPR spectra were acquired on a Bruker EMX X-band (9 GHz) instrument and visualized using WinEPR software. Due to expected solvent interference in aqueous solution, spectra were initially acquired at 96 K. Shown below is an initial spectrum acquired from a sample which was frozen shortly after combining trifluoromethylsulfinate and *tert*-butylhydroperoxide in aqueous solution.

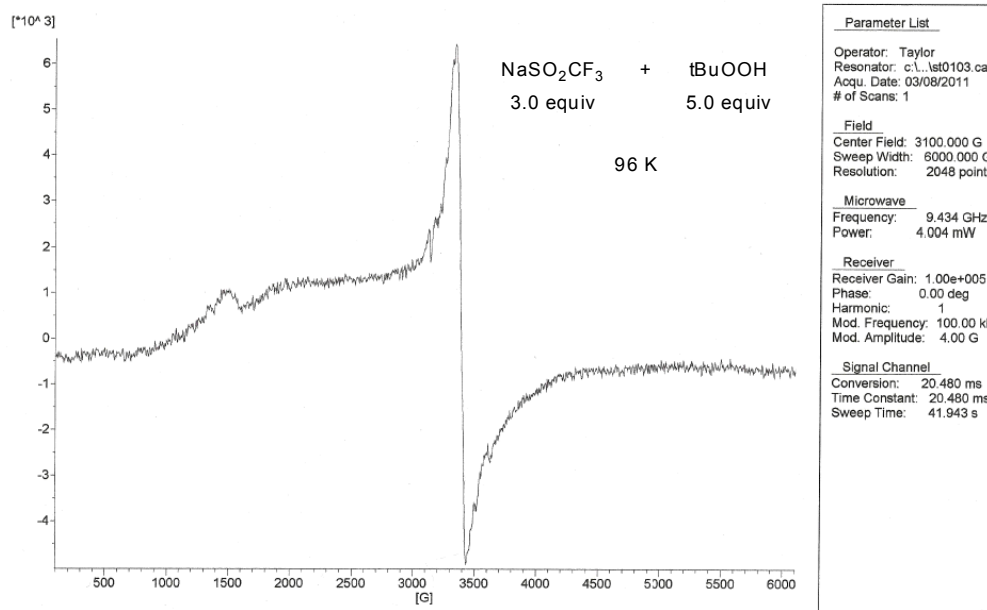

Due to the high signal to noise ratio observed, subsequent spectra were acquired at approximately 298 K in a narrow melting point capillary placed inside an EPR tube.

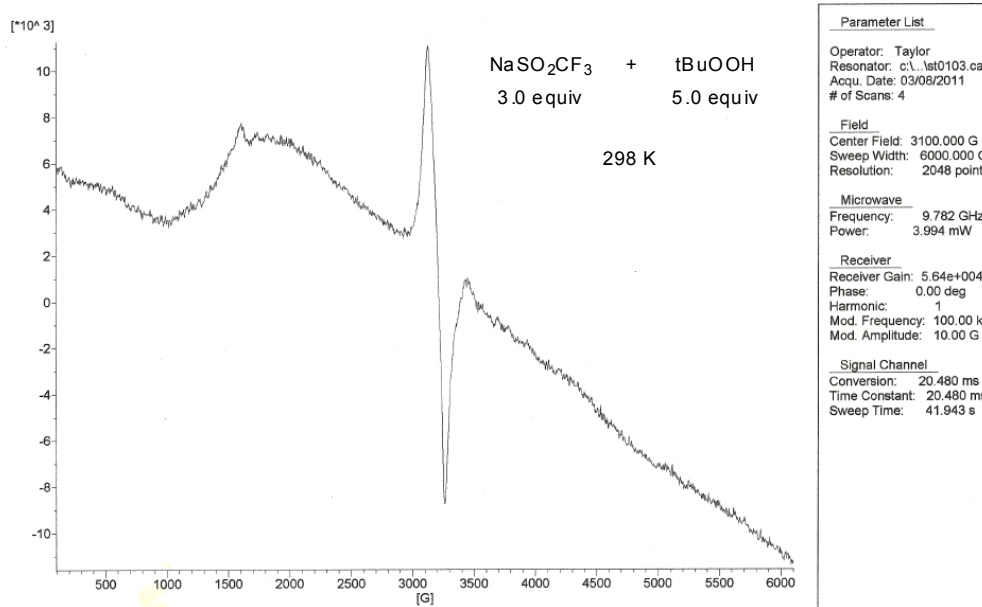

Allowing this solution to stand for approximately one hour at room temperature reveals the presence of more complex signals arising from species containing unpaired electrons.

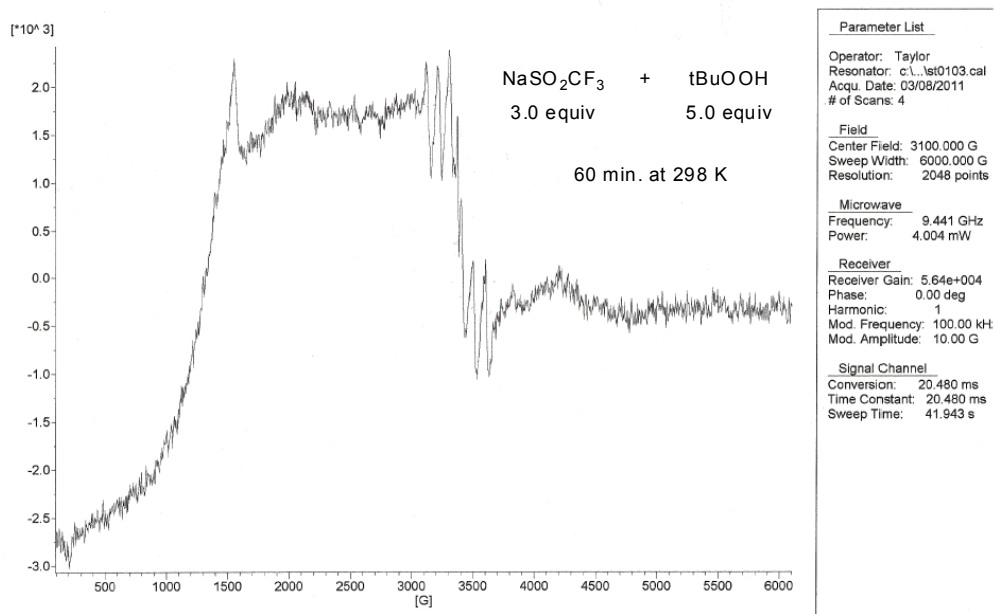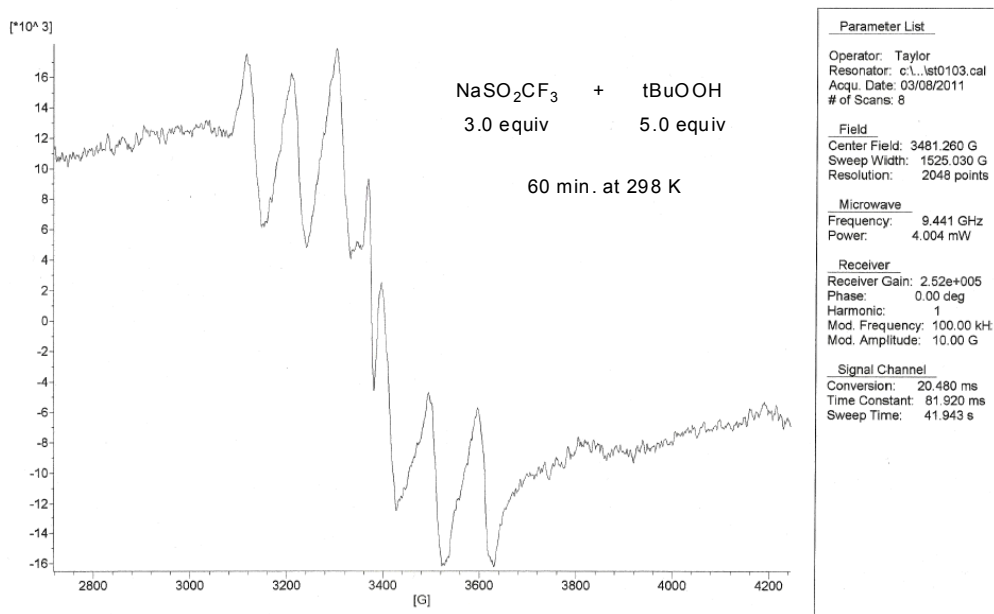

In the absence of a coupling partner, nearly all radical species have disappeared over the course of three hours.

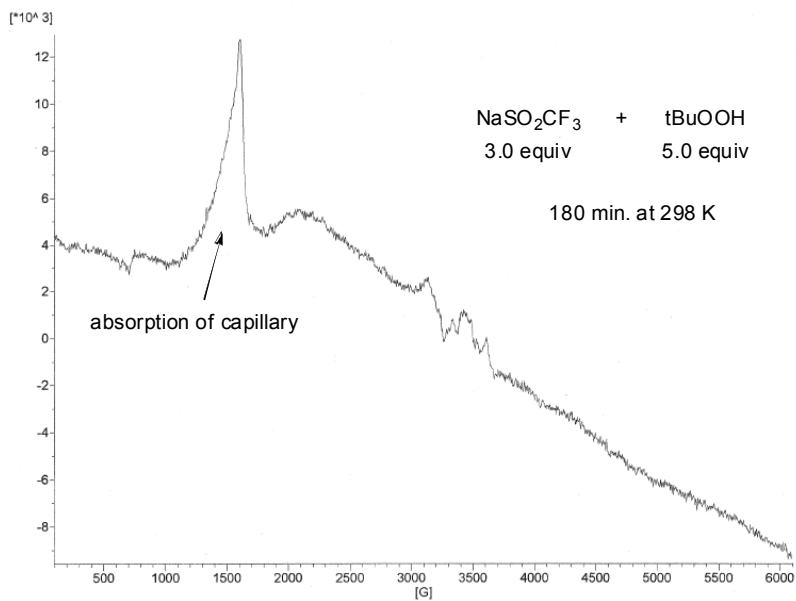

| Parameter List  |                 |
|-----------------|-----------------|
| Operator:       | Taylor          |
| Resonator:      | c:\_lst0103.cal |
| Acq. Date:      | 03/08/2011      |
| # of Scans:     | 4               |
| Field           |                 |
| Center Field:   | 3100.000 G      |
| Sweep Width:    | 6000.000 G      |
| Resolution:     | 2048 points     |
| Microwave       |                 |
| Frequency:      | 9.772 GHz       |
| Power:          | 3.994 mW        |
| Receiver        |                 |
| Receiver Gain:  | 5.64e+004       |
| Phase:          | 0.00 deg        |
| Harmonic:       | 1               |
| Mod. Frequency: | 100.00 kHz      |
| Mod. Amplitude: | 10.00 G         |
| Signal Channel  |                 |
| Conversion:     | 20.480 ms       |
| Time Constant:  | 20.480 ms       |
| Sweep Time:     | 41.943 s        |

**Observation of CF<sub>3</sub>H via <sup>19</sup>F-NMR.** Trifluoromethylsulfinate (117 mg, 0.75 mmol) was dissolved in a combination of CD<sub>2</sub>CL<sub>2</sub> and D<sub>2</sub>O (1 mL each) and placed into an NMR tube. *Tert*-butylhydrogenperoxide (70% solution in water, 0.17 mL, 1.25 mmol) was added dropwise to the mixture and gas was allowed to evolve (exothermic). The tube was then sealed, inverted, and <sup>19</sup>F-NMR spectra were collected once the biphasic mixture had settled into distinct layers. A fluorinated-alkyl species was observed at -78.64 ppm (referenced to CFC<sub>3</sub>) in the <sup>19</sup>F-<sup>1</sup>H decoupled spectrum. A subsequent <sup>19</sup>F-<sup>1</sup>H coupled spectrum was immediately acquired which yielded a clear doublet centered around the original peak at -78.64 ppm, indicative of the CF<sub>3</sub> fluorines being split by a single hydrogen.

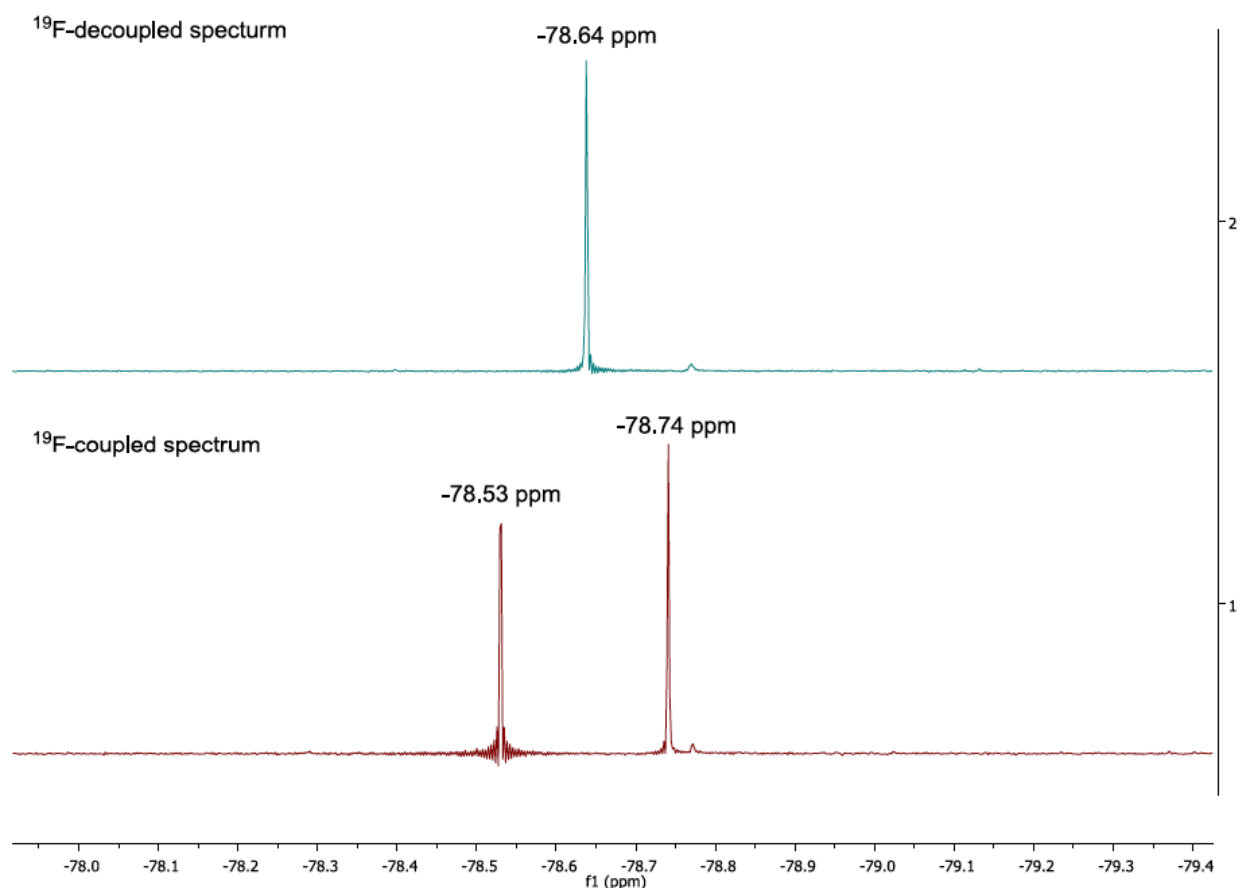

**Trace Elemental Analysis of *tert*-butylhydroperoxide (“Liquid Sample”) CF<sub>3</sub>SO<sub>2</sub>Na (“Solid Sample”):**

Analyze samples for metals via ICP-MS. Samples reported as parts per billion (ppb)  
 ND=element was not detectable in sample.

---

|    | Liquid Sample<br>ppb | Solid Sample<br>ppb |    | Liquid Sample<br>ppb | Solid Sample<br>ppb |
|----|----------------------|---------------------|----|----------------------|---------------------|
| Li | 17.73                | 28.13               | Nb | ND                   | 28.98               |
| Be | ND                   | ND                  | Mo | ND                   | 1746.29             |
| B  | 6791.00              | 7023.22             | Ru | ND                   | ND                  |
| Al | 24.50                | 567.78              | Rh | ND                   | ND                  |
| Sc | 112.28               | 484.01              | Cd | ND                   | ND                  |
| V  | ND                   | 357.04              | Sn | ND                   | 28.68               |
| Cr | 1864.85              | 24599.62            | Sb | ND                   | 31.12               |
| Mn | 4.92                 | 1456.86             | Ba | ND                   | ND                  |
| Co | ND                   | 431.89              | La | ND                   | ND                  |
| Ni | 24.02                | 6634.85             | Hf | ND                   | ND                  |
| Cu | 14.73                | 4707.94             | W  | ND                   | 11.61               |
| Zn | 24.02                | 6634.85             | Re | ND                   | ND                  |
| Ga | ND                   | ND                  | Ir | ND                   | ND                  |
| Ge | ND                   | 12.43               | Tl | ND                   | ND                  |
| As | ND                   | 62.54               | Pb | ND                   | ND                  |
| Rb | ND                   | 4.81                | Bi | 127.49               | 367.79              |
| Sr | ND                   | 5.50                | Ca | 8.13                 | 968.11              |
| Y  | ND                   | ND                  | Fe | 17.11                | 30006.10            |
| Zr | ND                   | ND                  |    |                      |                     |



# GC Trace from Figure 7 – 4-acetylpyridine with tetradecane standard

Data File C:\CHEM32\1\DATA\RDB\RDB1-ACETYL-SM-8-8.D

Sample Name: rdb1-acetyl-sm-8-8

```
=====
Acq. Operator   : Ryan                      Seq. Line :    8
Acq. Instrument : GC-FID                    Location  : Vial 8
Injection Date  : 3/28/2011 12:30:24 PM     Inj       :    1
                                           Inj Volume: 1 µl

Acq. Method     : C:\CHEM32\1\METHODS\DB-5-GENERAL-SHORT.M
Last changed    : 3/23/2011 11:30:50 AM by Ryan
Analysis Method : C:\CHEM32\1\METHODS\BETADEX-1B.M
Last changed    : 4/16/2011 12:13:31 PM by Ryan
                (modified after loading)
=====
```

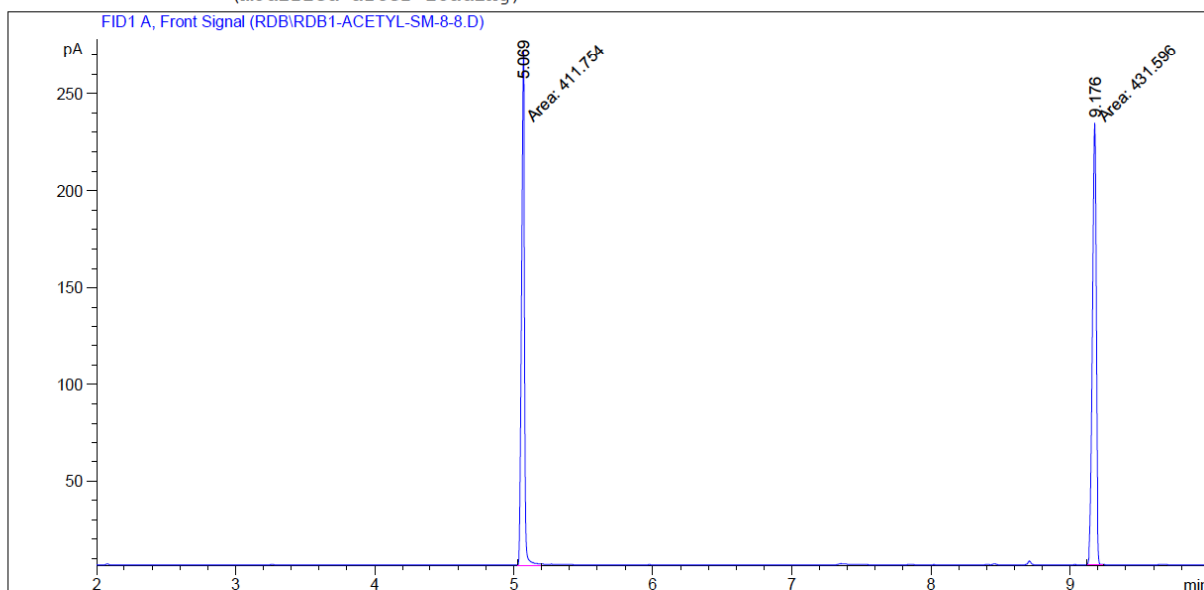

## Area Percent Report

```
Sorted By      :      Signal
Multiplier:    :      1.0000
Dilution:      :      1.0000
Use Multiplier & Dilution Factor with ISTDs
```

Signal 1: FID1 A, Front Signal

| Peak # | RetTime [min] | Type | Width [min] | Area [pA*s] | Height [pA] | Area %  |
|--------|---------------|------|-------------|-------------|-------------|---------|
| 1      | 0.401         | BV   | 0.0570      | 6.70501e-2  | 1.79374e-2  | 0.00014 |
| 2      | 1.314         | BV   | 0.0151      | 7.85758e-2  | 7.60041e-2  | 0.00017 |
| 3      | 1.347         | VV   | 0.0192      | 8.01223e-2  | 6.14528e-2  | 0.00017 |
| 4      | 1.380         | VV   | 0.0133      | 6.91922e-2  | 7.85648e-2  | 0.00015 |
| 5      | 1.409         | VV   | 0.0115      | 1.40246     | 1.93218     | 0.00300 |

# GC Trace from Figure 7 – 2-trifluoromethyl-4-acetylpyridine (1-C2) with tetradecane standard

Data File C:\CHEM32\1\DATA\RDB\RDB1-MAJ-50-50-2.D

Sample Name: rdb1-maj-50-50-2

```

=====
Acq. Operator   : Ryan                               Seq. Line : 20
Acq. Instrument : GC-FID                           Location  : Vial 25
Injection Date  : 3/29/2011 9:22:17 PM             Inj       : 1
                                                    Inj Volume: 1 µl

Acq. Method     : C:\CHEM32\1\METHODS\DB-5-GENERAL-SHORT.M
Last changed    : 3/23/2011 11:30:50 AM by Ryan
Analysis Method : C:\CHEM32\1\METHODS\BETADEX-1B.M
Last changed    : 4/16/2011 12:13:31 PM by Ryan
                (modified after loading)
    
```

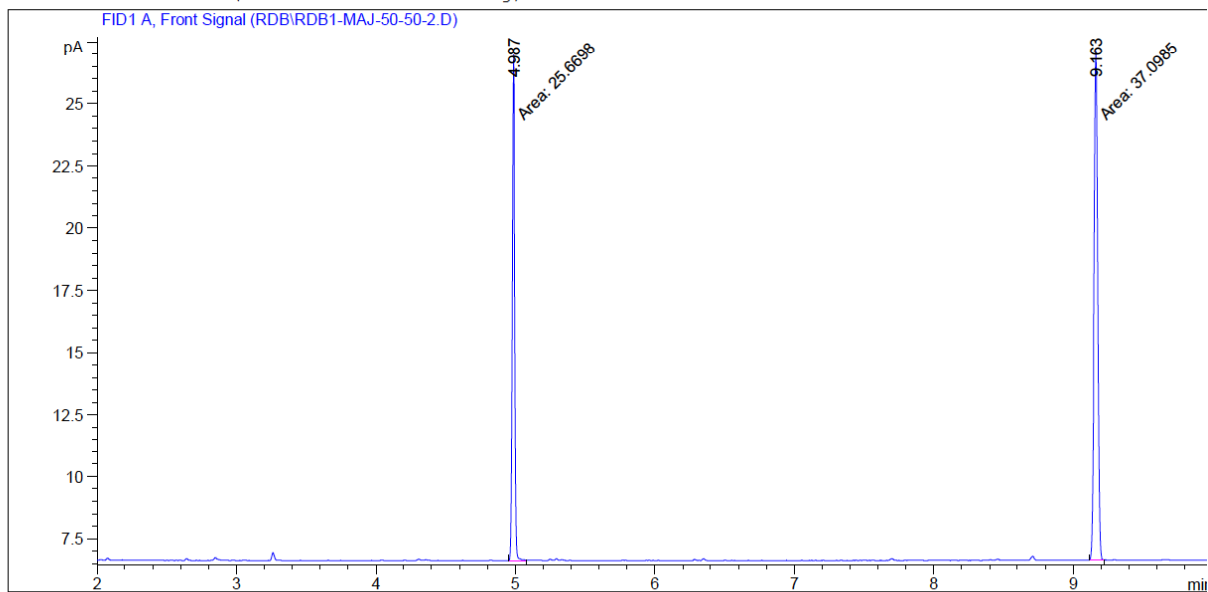

## Area Percent Report

```

=====
Sorted By      :      Signal
Multiplier:    :      1.0000
Dilution:      :      1.0000
Use Multiplier & Dilution Factor with ISTDs
    
```

Signal 1: FID1 A, Front Signal

| Peak # | RetTime [min] | Type | Width [min] | Area [pA*s] | Height [pA] | Area %   |
|--------|---------------|------|-------------|-------------|-------------|----------|
| 1      | 1.348         | VV   | 0.0169      | 6.41681e-2  | 5.79595e-2  | 0.00013  |
| 2      | 1.380         | VV   | 0.0124      | 5.20701e-2  | 6.48676e-2  | 0.00011  |
| 3      | 1.431         | VB S | 0.0204      | 4.88915e4   | 3.27260e4   | 99.81003 |
| 4      | 1.532         | BB X | 0.0166      | 3.09201e-1  | 3.09655e-1  | 0.00063  |
| 5      | 1.605         | BV X | 0.0150      | 8.10648e-2  | 8.62715e-2  | 0.00017  |

# GC Trace from Figure 7 – 3-trifluoromethyl-4-acetylpyridine (1-C3) with tetradecane standard

Data File C:\CHEM32\1\DATA\RDB\RDB1-MIN-50-50-2.D

Sample Name: rdb1-min-50-50-2

```

=====
Acq. Operator   : Ryan                      Seq. Line : 21
Acq. Instrument : GC-FID                    Location  : Vial 35
Injection Date  : 3/29/2011 9:34:24 PM      Inj       : 1
                                           Inj Volume: 1 µl

Acq. Method     : C:\CHEM32\1\METHODS\DB-5-GENERAL-SHORT.M
Last changed    : 3/23/2011 11:30:50 AM by Ryan
Analysis Method : C:\CHEM32\1\METHODS\BETADEX-1B.M
Last changed    : 4/16/2011 12:13:31 PM by Ryan
                (modified after loading)
    
```

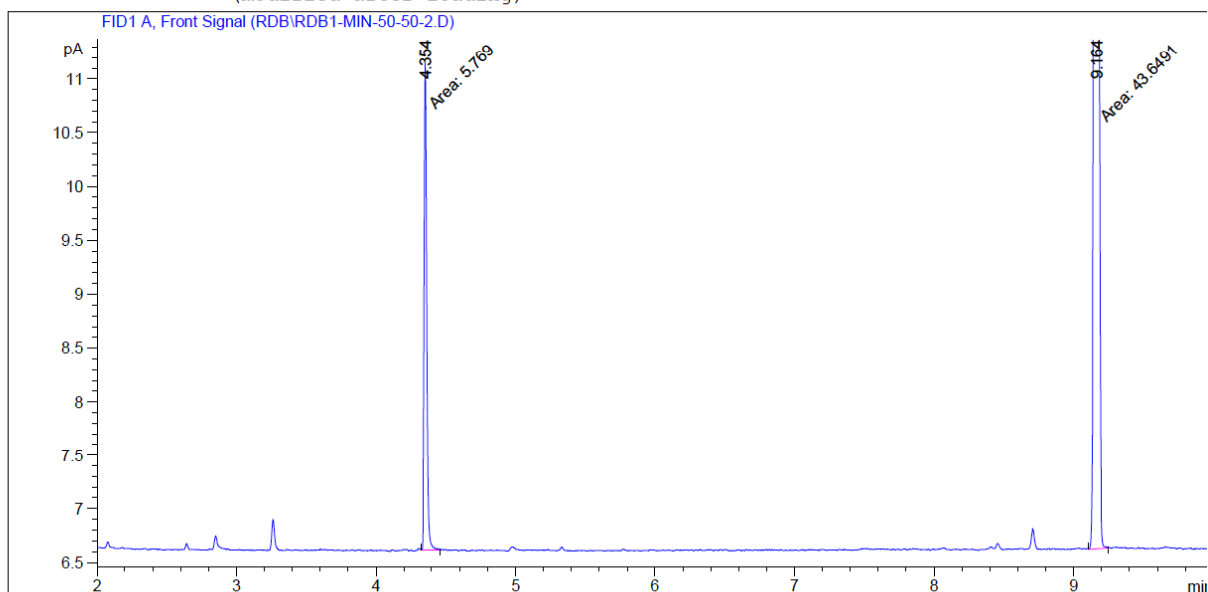

## Area Percent Report

```

=====
Sorted By      :      Signal
Multiplier:    :      1.0000
Dilution:      :      1.0000
Use Multiplier & Dilution Factor with ISTDs
    
```

Signal 1: FID1 A, Front Signal

| Peak # | RetTime [min] | Type | Width [min] | Area [pA*s] | Height [pA] | Area %   |
|--------|---------------|------|-------------|-------------|-------------|----------|
| 1      | 1.314         | BV   | 0.0150      | 4.54913e-2  | 4.83437e-2  | 9.336e-5 |
| 2      | 1.347         | VV   | 0.0164      | 7.72374e-2  | 7.26970e-2  | 0.00016  |
| 3      | 1.381         | VV   | 0.0135      | 6.40000e-2  | 7.84168e-2  | 0.00013  |
| 4      | 1.431         | VB S | 0.0204      | 4.86479e4   | 3.26120e4   | 99.84193 |
| 5      | 1.747         | BB X | 0.0172      | 27.41441    | 26.14367    | 0.05626  |

# GC Trace from Figure 7 – Standard solvent system reaction (2.5:1 DCM:H<sub>2</sub>O) after 24 h.

Data File C:\CHEM32\1\DATA\RDB\RDB1-YN2-3.D

Sample Name: rdb1-YN2-3

```
=====
Acq. Operator   : Ryan                      Seq. Line : 23
Acq. Instrument : GC-FID                    Location  : Vial 73
Injection Date  : 4/2/2011 7:06:28 PM      Inj       : 1
                                                Inj Volume: 1 µl

Acq. Method     : C:\CHEM32\1\METHODS\DB-5-GENERAL-SHORT.M
Last changed    : 3/23/2011 11:30:50 AM by Ryan
Analysis Method : C:\CHEM32\1\METHODS\BETADDEX-1B.M
Last changed    : 4/16/2011 12:13:31 PM by Ryan
                (modified after loading)
=====
```

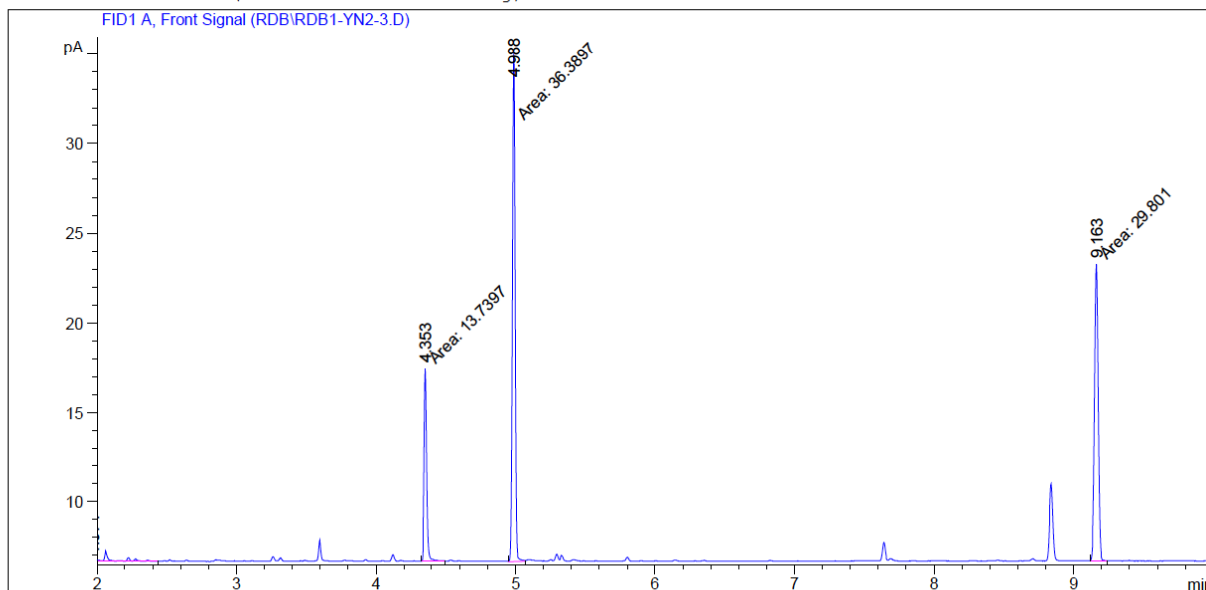

## Area Percent Report

```
Sorted By      :      Signal
Multiplier:    :      1.0000
Dilution:      :      1.0000
Use Multiplier & Dilution Factor with ISTDs
```

Signal 1: FID1 A, Front Signal

| Peak # | RetTime [min] | Type | Width [min] | Area [pA*s] | Height [pA] | Area %   |
|--------|---------------|------|-------------|-------------|-------------|----------|
| 1      | 1.315         | BV   | 0.0159      | 3.09993e-1  | 3.03168e-1  | 0.00068  |
| 2      | 1.360         | VV   | 0.0163      | 5.15667e-1  | 4.51734e-1  | 0.00113  |
| 3      | 1.387         | VV   | 0.0129      | 7.84142e-1  | 9.64555e-1  | 0.00172  |
| 4      | 1.410         | VV   | 9.68e-3     | 2.15038     | 3.50760     | 0.00471  |
| 5      | 1.431         | VB S | 0.0203      | 4.55489e4   | 3.06509e4   | 99.75052 |

# GC Trace from Figure 7 – Trifluorotoluene:Acetone (1:1) after 24 h (~50% yield with SM left).

Data File C:\CHEM32\1\DATA\RDB\TB952\_24H.D

Sample Name: TB952\_24h

```
=====
Acq. Operator   : Ryan                               Seq. Line :    1
Acq. Instrument : GC-FID                             Location  : Vial 25
Injection Date  : 4/30/2011 9:22:34 AM              Inj       :    1
                                                    Inj Volume: 1 µl

Acq. Method     : C:\CHEM32\1\METHODS\DB-5-GENERAL-SHORT.M
Last changed    : 4/27/2011 11:04:44 AM by Ryan
Analysis Method : C:\CHEM32\1\METHODS\BETADEX-1B.M
Last changed    : 4/16/2011 12:13:31 PM by Ryan
                (modified after loading)
=====
```

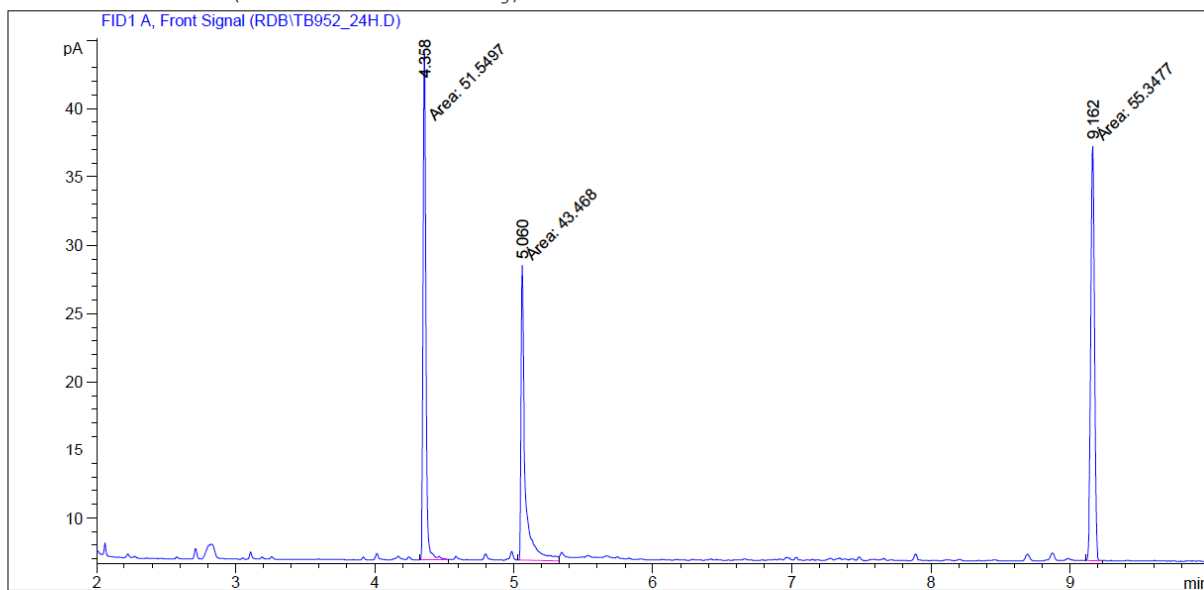

## Area Percent Report

```
Sorted By      :      Signal
Multiplier:    :      1.0000
Dilution:      :      1.0000
Use Multiplier & Dilution Factor with ISTDs
```

Signal 1: FID1 A, Front Signal

| Peak # | RetTime [min] | Type | Width [min] | Area [pA*s] | Height [pA] | Area %   |
|--------|---------------|------|-------------|-------------|-------------|----------|
| 1      | 4.358         | MM   | 0.0225      | 51.54967    | 38.11177    | 34.28292 |
| 2      | 5.060         | MM   | 0.0333      | 43.46805    | 21.75716    | 28.90827 |
| 3      | 9.162         | MM   | 0.0302      | 55.34772    | 30.55031    | 36.80880 |

Totals :                            150.36543    90.41924
